# Supplementary material for: TMSOTf-catalyzed synthesis of trisubstituted imidazoles using hexamethyldisilazane as a nitrogen source under neat and microwave irradiation conditions
Source: PubMed Central journal article supplement — RSC Adv. 2021 Aug 19;11(45):28061–71. doi: 10.1039/d1ra05802a (PMC9039414; doi:10.1039/d1ra05802a), 2021-08-19
Supplement: RA-011-D1RA05802A-s001.pdf [file RA-011-D1RA05802A-s001.pdf]

*Supplementary Information*

*for*

**TMSOTf-catalyzed Synthesis of Trisubstituted Imidazoles Using  
Hexamethyldisilazane as a Nitrogen Source under Neat and Microwave  
Irradiation Conditions**

Kesatebrhan Haile Asressu, Chieh-Kai Chan, Cheng-Chung Wang\*  
*Institute of Chemistry, Academia Sinica Taipei 115, Taiwan*

E-mail: wangcc@chem.sinica.edu.tw

|                                                                                                             |             |
|-------------------------------------------------------------------------------------------------------------|-------------|
| I. Crystal data for compounds <b>3n</b> , <b>3q</b> , <b>3s</b> , <b>3w</b> , <b>3z</b> and <b>4h</b> ..... | S-2~S-55    |
| II. <sup>1</sup> H and <sup>13</sup> C NMR spectra for compounds <b>3a-ab</b> .....                         | S-56~S-111  |
| III. <sup>1</sup> H and <sup>13</sup> C NMR spectra for compounds <b>4a-m</b> .....                         | S-112~S-133 |
| IV. <sup>1</sup> H and <sup>13</sup> C NMR spectra for compounds <b>5a</b> and <b>5b</b> .....              | S-134~S-137 |
| V. HRMS of ethane-1,2-diimine intermediate <b>H</b> .....                                                   | S-138       |

## Crystal data and structure refinement for compound **3n**

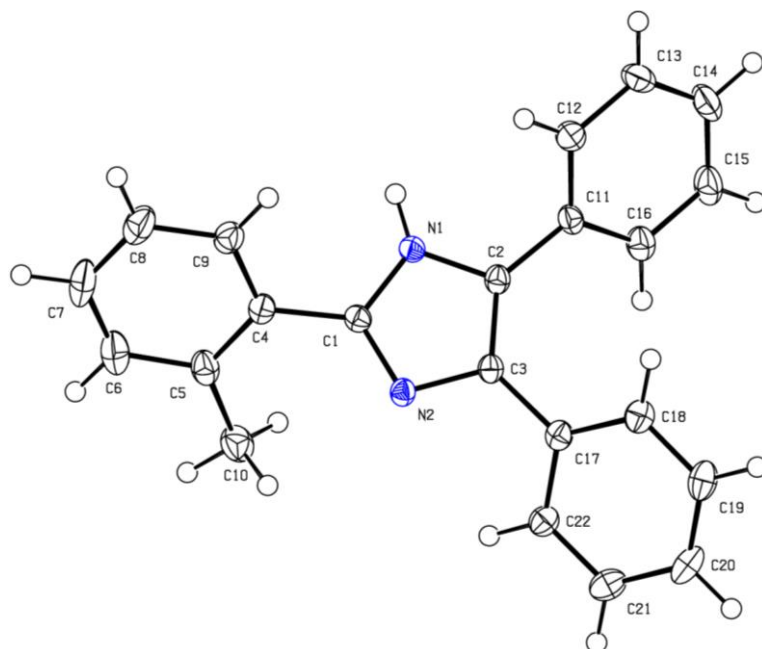

**Figure S1.** Single X-ray crystal structure of imidazole **3n** (the thermal ellipsoid was drawn at the 50% probability level)

**Table S1. Crystal data and structure refinement for i18082**

|                                 |                                                |                    |
|---------------------------------|------------------------------------------------|--------------------|
| CCDC                            | 2082023                                        |                    |
| Identification code             | i18082                                         |                    |
| Empirical formula               | C <sub>22</sub> H <sub>18</sub> N <sub>2</sub> |                    |
| Formula weight                  | 310.38                                         |                    |
| Temperature                     | 100.0(2) K                                     |                    |
| Wavelength                      | 0.71073 Å                                      |                    |
| Crystal system                  | Monoclinic                                     |                    |
| Space group                     | C c                                            |                    |
| Unit cell dimensions            | a = 10.7445(3) Å                               | α = 90°.           |
|                                 | b = 19.4078(5) Å                               | β = 112.9490(10)°. |
|                                 | c = 8.7809(2) Å                                | γ = 90°.           |
| Volume                          | 1686.13(8) Å <sup>3</sup>                      |                    |
| Z                               | 4                                              |                    |
| Density (calculated)            | 1.223 Mg/m <sup>3</sup>                        |                    |
| Absorption coefficient          | 0.072 mm <sup>-1</sup>                         |                    |
| F(000)                          | 656                                            |                    |
| Crystal size                    | 0.245 x 0.099 x 0.084 mm <sup>3</sup>          |                    |
| Theta range for data collection | 2.764 to 27.494°.                              |                    |
| Index ranges                    | -13 ≤ h ≤ 13, -25 ≤ k ≤ 25, -11 ≤ l ≤ 11       |                    |

|                                   |                                             |
|-----------------------------------|---------------------------------------------|
| Reflections collected             | 24629                                       |
| Independent reflections           | 3652 [R(int) = 0.0527]                      |
| Completeness to theta = 25.242°   | 99.6 %                                      |
| Absorption correction             | Numerical                                   |
| Max. and min. transmission        | 0.9987 and 0.9811                           |
| Refinement method                 | Full-matrix least-squares on F <sup>2</sup> |
| Data / restraints / parameters    | 3652 / 2 / 223                              |
| Goodness-of-fit on F <sup>2</sup> | 1.064                                       |
| Final R indices [I>2sigma(I)]     | R1 = 0.0334, wR2 = 0.0757                   |
| R indices (all data)              | R1 = 0.0419, wR2 = 0.0808                   |
| Absolute structure parameter      | 2(3)                                        |
| Extinction coefficient            | n/a                                         |
| Largest diff. peak and hole       | 0.155 and -0.164 e.Å <sup>-3</sup>          |

**Table S2. Atomic coordinates ( x 10<sup>4</sup>) and equivalent isotropic displacement parameters (Å<sup>2</sup>x 10<sup>3</sup>) for i18082. U(eq) is defined as one third of the trace of the orthogonalized U<sup>ij</sup> tensor.**

|       | x       | y       | z       | U(eq) |
|-------|---------|---------|---------|-------|
| N(1)  | 5306(2) | 4864(1) | 3924(2) | 17(1) |
| N(2)  | 4925(2) | 4338(1) | 5938(2) | 17(1) |
| C(1)  | 4583(2) | 4864(1) | 4888(2) | 17(1) |
| C(2)  | 6145(2) | 4296(1) | 4339(2) | 18(1) |
| C(3)  | 5908(2) | 3975(1) | 5608(2) | 17(1) |
| C(4)  | 3619(2) | 5418(1) | 4802(2) | 20(1) |
| C(5)  | 2378(2) | 5284(1) | 4920(3) | 24(1) |
| C(6)  | 1545(3) | 5847(1) | 4837(3) | 34(1) |
| C(7)  | 1920(3) | 6513(1) | 4652(4) | 39(1) |
| C(8)  | 3140(3) | 6637(1) | 4526(3) | 33(1) |
| C(9)  | 3989(2) | 6090(1) | 4594(3) | 24(1) |
| C(10) | 1907(2) | 4567(1) | 5083(3) | 31(1) |
| C(11) | 6982(2) | 4130(1) | 3409(2) | 19(1) |
| C(12) | 7640(2) | 4650(1) | 2914(3) | 23(1) |
| C(13) | 8376(2) | 4492(1) | 1960(3) | 29(1) |
| C(14) | 8456(2) | 3818(1) | 1493(3) | 32(1) |
| C(15) | 7823(2) | 3299(1) | 1991(3) | 30(1) |
| C(16) | 7084(2) | 3450(1) | 2938(3) | 24(1) |
| C(17) | 6548(2) | 3368(1) | 6608(3) | 19(1) |

|       |         |         |         |       |
|-------|---------|---------|---------|-------|
| C(18) | 7901(2) | 3196(1) | 6971(3) | 23(1) |
| C(19) | 8469(2) | 2616(1) | 7905(3) | 27(1) |
| C(20) | 7716(2) | 2200(1) | 8511(3) | 28(1) |
| C(21) | 6388(2) | 2372(1) | 8189(3) | 26(1) |
| C(22) | 5810(2) | 2951(1) | 7257(3) | 22(1) |

---

**Table S3. Bond lengths [Å] and angles [°] for i18082.**

---

|              |          |
|--------------|----------|
| N(1)-C(1)    | 1.354(3) |
| N(1)-C(2)    | 1.381(3) |
| N(1)-H(1)    | 0.90(3)  |
| N(2)-C(1)    | 1.327(3) |
| N(2)-C(3)    | 1.390(3) |
| C(1)-C(4)    | 1.473(3) |
| C(2)-C(3)    | 1.383(3) |
| C(2)-C(11)   | 1.467(3) |
| C(3)-C(17)   | 1.470(3) |
| C(4)-C(9)    | 1.397(3) |
| C(4)-C(5)    | 1.402(3) |
| C(5)-C(6)    | 1.396(3) |
| C(5)-C(10)   | 1.507(3) |
| C(6)-C(7)    | 1.381(4) |
| C(6)-H(6)    | 0.9500   |
| C(7)-C(8)    | 1.380(4) |
| C(7)-H(7)    | 0.9500   |
| C(8)-C(9)    | 1.385(3) |
| C(8)-H(8)    | 0.9500   |
| C(9)-H(9)    | 0.9500   |
| C(10)-H(10A) | 0.9800   |
| C(10)-H(10B) | 0.9800   |
| C(10)-H(10C) | 0.9800   |
| C(11)-C(12)  | 1.394(3) |
| C(11)-C(16)  | 1.400(3) |
| C(12)-C(13)  | 1.391(3) |
| C(12)-H(12)  | 0.9500   |
| C(13)-C(14)  | 1.385(4) |
| C(13)-H(13)  | 0.9500   |

|             |          |
|-------------|----------|
| C(14)-C(15) | 1.378(4) |
| C(14)-H(14) | 0.9500   |
| C(15)-C(16) | 1.387(3) |
| C(15)-H(15) | 0.9500   |
| C(16)-H(16) | 0.9500   |
| C(17)-C(22) | 1.400(3) |
| C(17)-C(18) | 1.402(3) |
| C(18)-C(19) | 1.386(3) |
| C(18)-H(18) | 0.9500   |
| C(19)-C(20) | 1.388(3) |
| C(19)-H(19) | 0.9500   |
| C(20)-C(21) | 1.383(3) |
| C(20)-H(20) | 0.9500   |
| C(21)-C(22) | 1.386(3) |
| C(21)-H(21) | 0.9500   |
| C(22)-H(22) | 0.9500   |

|                 |            |
|-----------------|------------|
| C(1)-N(1)-C(2)  | 108.00(17) |
| C(1)-N(1)-H(1)  | 125.8(17)  |
| C(2)-N(1)-H(1)  | 126.0(17)  |
| C(1)-N(2)-C(3)  | 105.82(16) |
| N(2)-C(1)-N(1)  | 111.27(17) |
| N(2)-C(1)-C(4)  | 126.55(18) |
| N(1)-C(1)-C(4)  | 122.06(18) |
| N(1)-C(2)-C(3)  | 105.40(17) |
| N(1)-C(2)-C(11) | 120.41(18) |
| C(3)-C(2)-C(11) | 134.09(19) |
| C(2)-C(3)-N(2)  | 109.48(17) |
| C(2)-C(3)-C(17) | 130.60(18) |
| N(2)-C(3)-C(17) | 119.88(17) |
| C(9)-C(4)-C(5)  | 120.6(2)   |
| C(9)-C(4)-C(1)  | 117.27(19) |
| C(5)-C(4)-C(1)  | 122.09(19) |
| C(6)-C(5)-C(4)  | 117.4(2)   |
| C(6)-C(5)-C(10) | 119.8(2)   |
| C(4)-C(5)-C(10) | 122.8(2)   |
| C(7)-C(6)-C(5)  | 121.9(2)   |
| C(7)-C(6)-H(6)  | 119.1      |

|                     |            |
|---------------------|------------|
| C(5)-C(6)-H(6)      | 119.1      |
| C(8)-C(7)-C(6)      | 120.2(2)   |
| C(8)-C(7)-H(7)      | 119.9      |
| C(6)-C(7)-H(7)      | 119.9      |
| C(7)-C(8)-C(9)      | 119.5(2)   |
| C(7)-C(8)-H(8)      | 120.2      |
| C(9)-C(8)-H(8)      | 120.2      |
| C(8)-C(9)-C(4)      | 120.4(2)   |
| C(8)-C(9)-H(9)      | 119.8      |
| C(4)-C(9)-H(9)      | 119.8      |
| C(5)-C(10)-H(10A)   | 109.5      |
| C(5)-C(10)-H(10B)   | 109.5      |
| H(10A)-C(10)-H(10B) | 109.5      |
| C(5)-C(10)-H(10C)   | 109.5      |
| H(10A)-C(10)-H(10C) | 109.5      |
| H(10B)-C(10)-H(10C) | 109.5      |
| C(12)-C(11)-C(16)   | 118.79(19) |
| C(12)-C(11)-C(2)    | 120.75(19) |
| C(16)-C(11)-C(2)    | 120.40(19) |
| C(13)-C(12)-C(11)   | 120.4(2)   |
| C(13)-C(12)-H(12)   | 119.8      |
| C(11)-C(12)-H(12)   | 119.8      |
| C(14)-C(13)-C(12)   | 120.1(2)   |
| C(14)-C(13)-H(13)   | 120.0      |
| C(12)-C(13)-H(13)   | 120.0      |
| C(15)-C(14)-C(13)   | 120.1(2)   |
| C(15)-C(14)-H(14)   | 119.9      |
| C(13)-C(14)-H(14)   | 119.9      |
| C(14)-C(15)-C(16)   | 120.3(2)   |
| C(14)-C(15)-H(15)   | 119.9      |
| C(16)-C(15)-H(15)   | 119.9      |
| C(15)-C(16)-C(11)   | 120.4(2)   |
| C(15)-C(16)-H(16)   | 119.8      |
| C(11)-C(16)-H(16)   | 119.8      |
| C(22)-C(17)-C(18)   | 118.12(19) |
| C(22)-C(17)-C(3)    | 119.93(18) |
| C(18)-C(17)-C(3)    | 121.93(19) |
| C(19)-C(18)-C(17)   | 120.4(2)   |

|                   |          |
|-------------------|----------|
| C(19)-C(18)-H(18) | 119.8    |
| C(17)-C(18)-H(18) | 119.8    |
| C(18)-C(19)-C(20) | 120.7(2) |
| C(18)-C(19)-H(19) | 119.6    |
| C(20)-C(19)-H(19) | 119.6    |
| C(21)-C(20)-C(19) | 119.4(2) |
| C(21)-C(20)-H(20) | 120.3    |
| C(19)-C(20)-H(20) | 120.3    |
| C(20)-C(21)-C(22) | 120.3(2) |
| C(20)-C(21)-H(21) | 119.8    |
| C(22)-C(21)-H(21) | 119.8    |
| C(21)-C(22)-C(17) | 121.0(2) |
| C(21)-C(22)-H(22) | 119.5    |
| C(17)-C(22)-H(22) | 119.5    |

---

Symmetry transformations used to generate equivalent atoms:

**Table S4. Anisotropic displacement parameters ( $\text{\AA}^2 \times 10^3$ ) for i18082. The anisotropic displacement factor exponent takes the form:  $-2\pi^2 [ h^2 a^{*2} U^{11} + \dots + 2 h k a^* b^* U^{12} ]$**

|       | $U^{11}$ | $U^{22}$ | $U^{33}$ | $U^{23}$ | $U^{13}$ | $U^{12}$ |
|-------|----------|----------|----------|----------|----------|----------|
| N(1)  | 19(1)    | 19(1)    | 15(1)    | 1(1)     | 7(1)     | 2(1)     |
| N(2)  | 18(1)    | 18(1)    | 16(1)    | -1(1)    | 6(1)     | 2(1)     |
| C(1)  | 19(1)    | 18(1)    | 14(1)    | -2(1)    | 7(1)     | 0(1)     |
| C(2)  | 19(1)    | 18(1)    | 17(1)    | -2(1)    | 6(1)     | 2(1)     |
| C(3)  | 16(1)    | 17(1)    | 17(1)    | -2(1)    | 6(1)     | 1(1)     |
| C(4)  | 23(1)    | 21(1)    | 13(1)    | -1(1)    | 5(1)     | 5(1)     |
| C(5)  | 23(1)    | 30(1)    | 20(1)    | -3(1)    | 7(1)     | 5(1)     |
| C(6)  | 26(1)    | 39(1)    | 36(1)    | -4(1)    | 11(1)    | 11(1)    |
| C(7)  | 38(1)    | 33(1)    | 42(2)    | -2(1)    | 12(1)    | 19(1)    |
| C(8)  | 41(2)    | 22(1)    | 34(1)    | 1(1)     | 13(1)    | 9(1)     |
| C(9)  | 30(1)    | 22(1)    | 22(1)    | 0(1)     | 10(1)    | 5(1)     |
| C(10) | 22(1)    | 36(1)    | 34(1)    | 1(1)     | 12(1)    | 1(1)     |
| C(11) | 16(1)    | 25(1)    | 16(1)    | 0(1)     | 6(1)     | 4(1)     |
| C(12) | 21(1)    | 30(1)    | 19(1)    | 3(1)     | 7(1)     | 4(1)     |
| C(13) | 22(1)    | 44(1)    | 24(1)    | 11(1)    | 12(1)    | 5(1)     |
| C(14) | 27(1)    | 51(2)    | 24(1)    | 4(1)     | 15(1)    | 14(1)    |

|       |       |       |       |       |       |       |
|-------|-------|-------|-------|-------|-------|-------|
| C(15) | 32(1) | 35(1) | 24(1) | -5(1) | 12(1) | 11(1) |
| C(16) | 24(1) | 26(1) | 24(1) | -3(1) | 9(1)  | 3(1)  |
| C(17) | 22(1) | 17(1) | 16(1) | -4(1) | 6(1)  | 1(1)  |
| C(18) | 20(1) | 22(1) | 24(1) | -1(1) | 5(1)  | 0(1)  |
| C(19) | 20(1) | 25(1) | 29(1) | -3(1) | 2(1)  | 4(1)  |
| C(20) | 29(1) | 17(1) | 27(1) | 2(1)  | 0(1)  | 4(1)  |
| C(21) | 30(1) | 22(1) | 24(1) | 1(1)  | 6(1)  | -4(1) |
| C(22) | 20(1) | 21(1) | 21(1) | 1(1)  | 5(1)  | 0(1)  |

### Crystal data and structure refinement for compound **3q**

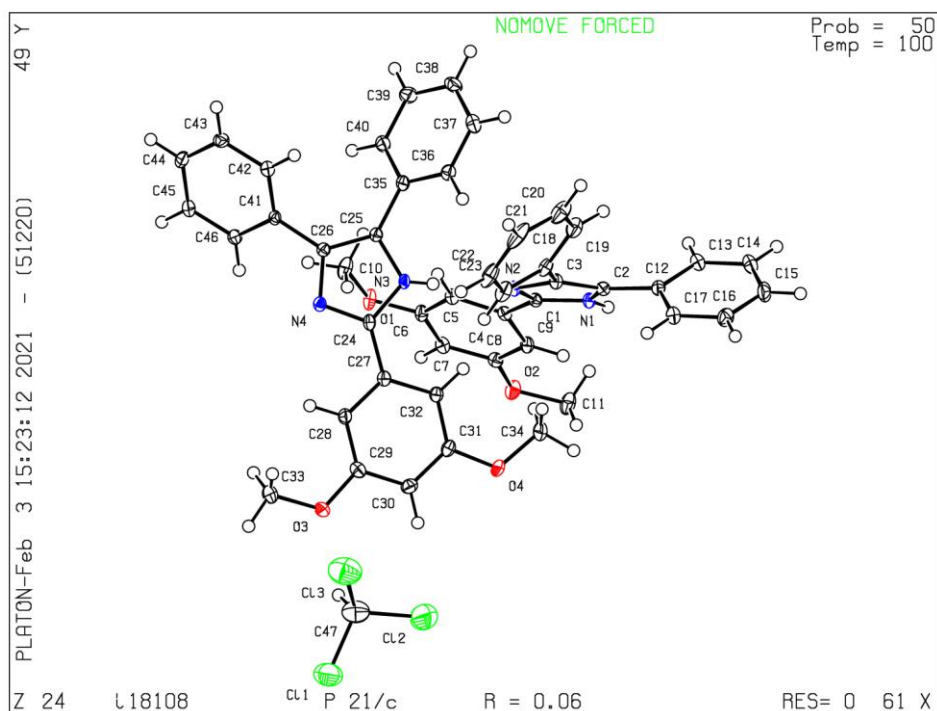

**Figure S2.** Single X-ray crystal structure of imidazole **3q** (the thermal ellipsoid was drawn at the 50% probability level)

**Table S5. Crystal data and structure refinement for i18108.**

|                     |                   |
|---------------------|-------------------|
| CCDC                | 2082029           |
| Identification code | i18108            |
| Empirical formula   | C47 H41 Cl3 N4 O4 |
| Formula weight      | 832.19            |
| Temperature         | 100.0(2) K        |
| Wavelength          | 0.71073 Å         |
| Crystal system      | Monoclinic        |
| Space group         | P 21/c            |



|                                   |                                             |                               |
|-----------------------------------|---------------------------------------------|-------------------------------|
| Unit cell dimensions              | a = 10.2370(4) Å                            | $\alpha = 90^\circ$ .         |
|                                   | b = 18.3683(6) Å                            | $\beta = 95.8070(10)^\circ$ . |
|                                   | c = 22.3540(8) Å                            | $\gamma = 90^\circ$ .         |
| Volume                            | 4181.8(3) Å <sup>3</sup>                    |                               |
| Z                                 | 4                                           |                               |
| Density (calculated)              | 1.322 Mg/m <sup>3</sup>                     |                               |
| Absorption coefficient            | 0.269 mm <sup>-1</sup>                      |                               |
| F(000)                            | 1736                                        |                               |
| Crystal size                      | 0.216 x 0.155 x 0.040 mm <sup>3</sup>       |                               |
| Theta range for data collection   | 2.141 to 27.103°.                           |                               |
| Index ranges                      | -13<=h<=13, -23<=k<=23, -28<=l<=28          |                               |
| Reflections collected             | 167934                                      |                               |
| Independent reflections           | 9215 [R(int) = 0.1039]                      |                               |
| Completeness to theta = 25.242°   | 99.9 %                                      |                               |
| Absorption correction             | Numerical                                   |                               |
| Max. and min. transmission        | 0.9971 and 0.9646                           |                               |
| Refinement method                 | Full-matrix least-squares on F <sup>2</sup> |                               |
| Data / restraints / parameters    | 9215 / 0 / 535                              |                               |
| Goodness-of-fit on F <sup>2</sup> | 1.054                                       |                               |
| Final R indices [I>2sigma(I)]     | R1 = 0.0627, wR2 = 0.1759                   |                               |
| R indices (all data)              | R1 = 0.0857, wR2 = 0.1928                   |                               |
| Extinction coefficient            | n/a                                         |                               |
| Largest diff. peak and hole       | 1.274 and -1.052 e.Å <sup>-3</sup>          |                               |

**Table S6. Atomic coordinates (  $\times 10^4$ ) and equivalent isotropic displacement parameters ( $\text{\AA}^2 \times 10^3$ ) for i18108.  $U(\text{eq})$  is defined as one third of the trace of the orthogonalized  $U^{ij}$  tensor.**

|       | x        | y        | z       | $U(\text{eq})$ |
|-------|----------|----------|---------|----------------|
| Cl(1) | 7496(1)  | 3601(1)  | 4147(1) | 50(1)          |
| Cl(2) | 8235(1)  | 4966(1)  | 4716(1) | 55(1)          |
| Cl(3) | 8207(1)  | 3665(1)  | 5431(1) | 57(1)          |
| O(1)  | 1293(2)  | 7033(1)  | 7240(1) | 18(1)          |
| O(2)  | 2411(2)  | 8961(1)  | 6056(1) | 18(1)          |
| O(3)  | 5272(2)  | 4495(1)  | 5660(1) | 26(1)          |
| O(4)  | 6993(2)  | 6815(1)  | 6028(1) | 20(1)          |
| N(1)  | 6568(2)  | 8639(1)  | 7664(1) | 12(1)          |
| N(2)  | 6260(2)  | 7497(1)  | 7927(1) | 12(1)          |
| N(3)  | 5151(2)  | 6080(1)  | 8071(1) | 12(1)          |
| N(4)  | 4032(2)  | 5081(1)  | 7809(1) | 12(1)          |
| C(1)  | 5714(2)  | 8073(1)  | 7643(1) | 12(1)          |
| C(2)  | 7732(2)  | 8418(1)  | 7980(1) | 12(1)          |
| C(3)  | 7524(2)  | 7706(1)  | 8139(1) | 12(1)          |
| C(4)  | 4389(2)  | 8074(1)  | 7320(1) | 12(1)          |
| C(5)  | 3481(2)  | 7557(1)  | 7475(1) | 13(1)          |
| C(6)  | 2261(2)  | 7515(1)  | 7134(1) | 14(1)          |
| C(7)  | 1945(2)  | 7981(1)  | 6656(1) | 14(1)          |
| C(8)  | 2835(2)  | 8514(1)  | 6522(1) | 14(1)          |
| C(9)  | 4072(2)  | 8563(1)  | 6846(1) | 14(1)          |
| C(10) | 1587(3)  | 6516(2)  | 7714(1) | 22(1)          |
| C(11) | 3269(3)  | 9543(2)  | 5923(1) | 23(1)          |
| C(12) | 8893(2)  | 8891(1)  | 8068(1) | 13(1)          |
| C(13) | 8789(3)  | 9616(1)  | 8251(1) | 16(1)          |
| C(14) | 9883(3)  | 10067(2) | 8300(1) | 21(1)          |
| C(15) | 11089(3) | 9806(2)  | 8167(1) | 22(1)          |
| C(16) | 11204(3) | 9085(2)  | 7988(1) | 20(1)          |
| C(17) | 10119(3) | 8633(1)  | 7938(1) | 16(1)          |
| C(18) | 8394(2)  | 7187(1)  | 8487(1) | 16(1)          |
| C(19) | 9151(3)  | 7394(2)  | 9012(1) | 21(1)          |
| C(20) | 9883(3)  | 6879(2)  | 9357(1) | 28(1)          |
| C(21) | 9860(3)  | 6151(2)  | 9184(2) | 29(1)          |
| C(22) | 9122(3)  | 5942(2)  | 8661(2) | 25(1)          |

|       |         |         |          |       |
|-------|---------|---------|----------|-------|
| C(23) | 8397(3) | 6456(1) | 8309(1)  | 19(1) |
| C(24) | 4850(2) | 5583(1) | 7628(1)  | 12(1) |
| C(25) | 4475(2) | 5902(1) | 8554(1)  | 11(1) |
| C(26) | 3787(2) | 5275(1) | 8383(1)  | 12(1) |
| C(27) | 5319(2) | 5609(1) | 7031(1)  | 13(1) |
| C(28) | 5094(3) | 5012(1) | 6647(1)  | 15(1) |
| C(29) | 5477(3) | 5046(1) | 6069(1)  | 18(1) |
| C(30) | 6100(3) | 5659(1) | 5871(1)  | 17(1) |
| C(31) | 6350(3) | 6244(1) | 6258(1)  | 15(1) |
| C(32) | 5957(2) | 6231(1) | 6838(1)  | 14(1) |
| C(33) | 4762(4) | 3823(2) | 5868(2)  | 38(1) |
| C(34) | 7363(4) | 7409(2) | 6419(1)  | 32(1) |
| C(35) | 4565(3) | 6351(1) | 9102(1)  | 13(1) |
| C(36) | 5761(3) | 6651(1) | 9333(1)  | 15(1) |
| C(37) | 5850(3) | 7072(1) | 9852(1)  | 19(1) |
| C(38) | 4745(3) | 7198(2) | 10146(1) | 20(1) |
| C(39) | 3547(3) | 6908(2) | 9918(1)  | 20(1) |
| C(40) | 3451(3) | 6485(1) | 9399(1)  | 17(1) |
| C(41) | 2829(2) | 4853(1) | 8695(1)  | 12(1) |
| C(42) | 3011(3) | 4687(1) | 9308(1)  | 15(1) |
| C(43) | 2046(3) | 4304(1) | 9573(1)  | 16(1) |
| C(44) | 902(3)  | 4086(1) | 9237(1)  | 16(1) |
| C(45) | 726(3)  | 4241(1) | 8625(1)  | 16(1) |
| C(46) | 1679(2) | 4624(1) | 8358(1)  | 14(1) |
| C(47) | 7452(4) | 4125(2) | 4798(2)  | 40(1) |

---

**Table S7. Bond lengths [ $\text{\AA}$ ] and angles [ $^\circ$ ] for i18108.**

---

|              |          |
|--------------|----------|
| Cl(1)-C(47)  | 1.750(4) |
| Cl(2)-C(47)  | 1.759(4) |
| Cl(3)-C(47)  | 1.758(4) |
| O(1)-C(6)    | 1.367(3) |
| O(1)-C(10)   | 1.433(3) |
| O(2)-C(8)    | 1.363(3) |
| O(2)-C(11)   | 1.433(3) |
| O(3)-C(29)   | 1.365(3) |
| O(3)-C(33)   | 1.434(4) |
| O(4)-C(31)   | 1.366(3) |
| O(4)-C(34)   | 1.426(3) |
| N(1)-C(1)    | 1.355(3) |
| N(1)-C(2)    | 1.383(3) |
| N(1)-H(1)    | 0.79(3)  |
| N(2)-C(1)    | 1.328(3) |
| N(2)-C(3)    | 1.387(3) |
| N(3)-C(24)   | 1.359(3) |
| N(3)-C(25)   | 1.379(3) |
| N(3)-H(3)    | 0.74(4)  |
| N(4)-C(24)   | 1.335(3) |
| N(4)-C(26)   | 1.380(3) |
| C(1)-C(4)    | 1.471(3) |
| C(2)-C(3)    | 1.378(3) |
| C(2)-C(12)   | 1.469(3) |
| C(3)-C(18)   | 1.471(3) |
| C(4)-C(5)    | 1.398(3) |
| C(4)-C(9)    | 1.403(3) |
| C(5)-C(6)    | 1.398(4) |
| C(5)-H(5)    | 0.9500   |
| C(6)-C(7)    | 1.381(4) |
| C(7)-C(8)    | 1.390(4) |
| C(7)-H(7)    | 0.9500   |
| C(8)-C(9)    | 1.397(4) |
| C(9)-H(9)    | 0.9500   |
| C(10)-H(10A) | 0.9800   |
| C(10)-H(10B) | 0.9800   |

|              |          |
|--------------|----------|
| C(10)-H(10C) | 0.9800   |
| C(11)-H(11A) | 0.9800   |
| C(11)-H(11B) | 0.9800   |
| C(11)-H(11C) | 0.9800   |
| C(12)-C(17)  | 1.398(4) |
| C(12)-C(13)  | 1.401(4) |
| C(13)-C(14)  | 1.388(4) |
| C(13)-H(13)  | 0.9500   |
| C(14)-C(15)  | 1.384(4) |
| C(14)-H(14)  | 0.9500   |
| C(15)-C(16)  | 1.392(4) |
| C(15)-H(15)  | 0.9500   |
| C(16)-C(17)  | 1.382(4) |
| C(16)-H(16)  | 0.9500   |
| C(17)-H(17)  | 0.9500   |
| C(18)-C(19)  | 1.393(4) |
| C(18)-C(23)  | 1.401(4) |
| C(19)-C(20)  | 1.391(4) |
| C(19)-H(19)  | 0.9500   |
| C(20)-C(21)  | 1.391(5) |
| C(20)-H(20)  | 0.9500   |
| C(21)-C(22)  | 1.380(5) |
| C(21)-H(21)  | 0.9500   |
| C(22)-C(23)  | 1.394(4) |
| C(22)-H(22)  | 0.9500   |
| C(23)-H(23)  | 0.9500   |
| C(24)-C(27)  | 1.465(3) |
| C(25)-C(26)  | 1.383(3) |
| C(25)-C(35)  | 1.471(3) |
| C(26)-C(41)  | 1.478(3) |
| C(27)-C(28)  | 1.398(3) |
| C(27)-C(32)  | 1.405(3) |
| C(28)-C(29)  | 1.390(4) |
| C(28)-H(28)  | 0.9500   |
| C(29)-C(30)  | 1.388(4) |
| C(30)-C(31)  | 1.389(4) |
| C(30)-H(30)  | 0.9500   |
| C(31)-C(32)  | 1.395(4) |

|                  |          |
|------------------|----------|
| C(32)-H(32)      | 0.9500   |
| C(33)-H(33A)     | 0.9800   |
| C(33)-H(33B)     | 0.9800   |
| C(33)-H(33C)     | 0.9800   |
| C(34)-H(34A)     | 0.9800   |
| C(34)-H(34B)     | 0.9800   |
| C(34)-H(34C)     | 0.9800   |
| C(35)-C(36)      | 1.394(4) |
| C(35)-C(40)      | 1.399(4) |
| C(36)-C(37)      | 1.390(4) |
| C(36)-H(36)      | 0.9500   |
| C(37)-C(38)      | 1.384(4) |
| C(37)-H(37)      | 0.9500   |
| C(38)-C(39)      | 1.386(4) |
| C(38)-H(38)      | 0.9500   |
| C(39)-C(40)      | 1.391(4) |
| C(39)-H(39)      | 0.9500   |
| C(40)-H(40)      | 0.9500   |
| C(41)-C(46)      | 1.397(4) |
| C(41)-C(42)      | 1.398(4) |
| C(42)-C(43)      | 1.394(4) |
| C(42)-H(42)      | 0.9500   |
| C(43)-C(44)      | 1.386(4) |
| C(43)-H(43)      | 0.9500   |
| C(44)-C(45)      | 1.390(4) |
| C(44)-H(44)      | 0.9500   |
| C(45)-C(46)      | 1.387(4) |
| C(45)-H(45)      | 0.9500   |
| C(46)-H(46)      | 0.9500   |
| C(47)-H(47)      | 1.0000   |
|                  |          |
| C(6)-O(1)-C(10)  | 117.2(2) |
| C(8)-O(2)-C(11)  | 117.0(2) |
| C(29)-O(3)-C(33) | 117.3(2) |
| C(31)-O(4)-C(34) | 117.7(2) |
| C(1)-N(1)-C(2)   | 108.2(2) |
| C(1)-N(1)-H(1)   | 125(2)   |
| C(2)-N(1)-H(1)   | 127(2)   |

|                     |          |
|---------------------|----------|
| C(1)-N(2)-C(3)      | 106.0(2) |
| C(24)-N(3)-C(25)    | 108.5(2) |
| C(24)-N(3)-H(3)     | 125(3)   |
| C(25)-N(3)-H(3)     | 125(3)   |
| C(24)-N(4)-C(26)    | 106.3(2) |
| N(2)-C(1)-N(1)      | 110.9(2) |
| N(2)-C(1)-C(4)      | 123.9(2) |
| N(1)-C(1)-C(4)      | 125.1(2) |
| C(3)-C(2)-N(1)      | 105.2(2) |
| C(3)-C(2)-C(12)     | 132.1(2) |
| N(1)-C(2)-C(12)     | 122.6(2) |
| C(2)-C(3)-N(2)      | 109.7(2) |
| C(2)-C(3)-C(18)     | 130.5(2) |
| N(2)-C(3)-C(18)     | 119.8(2) |
| C(5)-C(4)-C(9)      | 120.9(2) |
| C(5)-C(4)-C(1)      | 118.8(2) |
| C(9)-C(4)-C(1)      | 120.2(2) |
| C(4)-C(5)-C(6)      | 118.8(2) |
| C(4)-C(5)-H(5)      | 120.6    |
| C(6)-C(5)-H(5)      | 120.6    |
| O(1)-C(6)-C(7)      | 114.7(2) |
| O(1)-C(6)-C(5)      | 124.3(2) |
| C(7)-C(6)-C(5)      | 121.0(2) |
| C(6)-C(7)-C(8)      | 119.7(2) |
| C(6)-C(7)-H(7)      | 120.1    |
| C(8)-C(7)-H(7)      | 120.1    |
| O(2)-C(8)-C(7)      | 115.1(2) |
| O(2)-C(8)-C(9)      | 124.0(2) |
| C(7)-C(8)-C(9)      | 120.9(2) |
| C(8)-C(9)-C(4)      | 118.7(2) |
| C(8)-C(9)-H(9)      | 120.7    |
| C(4)-C(9)-H(9)      | 120.7    |
| O(1)-C(10)-H(10A)   | 109.5    |
| O(1)-C(10)-H(10B)   | 109.5    |
| H(10A)-C(10)-H(10B) | 109.5    |
| O(1)-C(10)-H(10C)   | 109.5    |
| H(10A)-C(10)-H(10C) | 109.5    |
| H(10B)-C(10)-H(10C) | 109.5    |

|                     |          |
|---------------------|----------|
| O(2)-C(11)-H(11A)   | 109.5    |
| O(2)-C(11)-H(11B)   | 109.5    |
| H(11A)-C(11)-H(11B) | 109.5    |
| O(2)-C(11)-H(11C)   | 109.5    |
| H(11A)-C(11)-H(11C) | 109.5    |
| H(11B)-C(11)-H(11C) | 109.5    |
| C(17)-C(12)-C(13)   | 118.6(2) |
| C(17)-C(12)-C(2)    | 120.2(2) |
| C(13)-C(12)-C(2)    | 121.1(2) |
| C(14)-C(13)-C(12)   | 120.4(2) |
| C(14)-C(13)-H(13)   | 119.8    |
| C(12)-C(13)-H(13)   | 119.8    |
| C(15)-C(14)-C(13)   | 120.4(3) |
| C(15)-C(14)-H(14)   | 119.8    |
| C(13)-C(14)-H(14)   | 119.8    |
| C(14)-C(15)-C(16)   | 119.7(3) |
| C(14)-C(15)-H(15)   | 120.2    |
| C(16)-C(15)-H(15)   | 120.2    |
| C(17)-C(16)-C(15)   | 120.2(3) |
| C(17)-C(16)-H(16)   | 119.9    |
| C(15)-C(16)-H(16)   | 119.9    |
| C(16)-C(17)-C(12)   | 120.7(2) |
| C(16)-C(17)-H(17)   | 119.6    |
| C(12)-C(17)-H(17)   | 119.6    |
| C(19)-C(18)-C(23)   | 119.0(2) |
| C(19)-C(18)-C(3)    | 121.6(2) |
| C(23)-C(18)-C(3)    | 119.3(2) |
| C(20)-C(19)-C(18)   | 120.3(3) |
| C(20)-C(19)-H(19)   | 119.9    |
| C(18)-C(19)-H(19)   | 119.9    |
| C(21)-C(20)-C(19)   | 120.4(3) |
| C(21)-C(20)-H(20)   | 119.8    |
| C(19)-C(20)-H(20)   | 119.8    |
| C(22)-C(21)-C(20)   | 119.7(3) |
| C(22)-C(21)-H(21)   | 120.1    |
| C(20)-C(21)-H(21)   | 120.1    |
| C(21)-C(22)-C(23)   | 120.3(3) |
| C(21)-C(22)-H(22)   | 119.8    |



|                     |          |
|---------------------|----------|
| C(23)-C(22)-H(22)   | 119.8    |
| C(22)-C(23)-C(18)   | 120.3(3) |
| C(22)-C(23)-H(23)   | 119.9    |
| C(18)-C(23)-H(23)   | 119.9    |
| N(4)-C(24)-N(3)     | 110.3(2) |
| N(4)-C(24)-C(27)    | 124.9(2) |
| N(3)-C(24)-C(27)    | 124.8(2) |
| N(3)-C(25)-C(26)    | 105.2(2) |
| N(3)-C(25)-C(35)    | 121.7(2) |
| C(26)-C(25)-C(35)   | 133.1(2) |
| N(4)-C(26)-C(25)    | 109.7(2) |
| N(4)-C(26)-C(41)    | 119.6(2) |
| C(25)-C(26)-C(41)   | 130.5(2) |
| C(28)-C(27)-C(32)   | 120.1(2) |
| C(28)-C(27)-C(24)   | 119.0(2) |
| C(32)-C(27)-C(24)   | 120.9(2) |
| C(29)-C(28)-C(27)   | 119.4(2) |
| C(29)-C(28)-H(28)   | 120.3    |
| C(27)-C(28)-H(28)   | 120.3    |
| O(3)-C(29)-C(30)    | 115.6(2) |
| O(3)-C(29)-C(28)    | 123.3(2) |
| C(30)-C(29)-C(28)   | 121.0(2) |
| C(29)-C(30)-C(31)   | 119.4(2) |
| C(29)-C(30)-H(30)   | 120.3    |
| C(31)-C(30)-H(30)   | 120.3    |
| O(4)-C(31)-C(30)    | 115.1(2) |
| O(4)-C(31)-C(32)    | 124.0(2) |
| C(30)-C(31)-C(32)   | 120.9(2) |
| C(31)-C(32)-C(27)   | 119.1(2) |
| C(31)-C(32)-H(32)   | 120.5    |
| C(27)-C(32)-H(32)   | 120.5    |
| O(3)-C(33)-H(33A)   | 109.5    |
| O(3)-C(33)-H(33B)   | 109.5    |
| H(33A)-C(33)-H(33B) | 109.5    |
| O(3)-C(33)-H(33C)   | 109.5    |
| H(33A)-C(33)-H(33C) | 109.5    |
| H(33B)-C(33)-H(33C) | 109.5    |
| O(4)-C(34)-H(34A)   | 109.5    |

|                     |          |
|---------------------|----------|
| O(4)-C(34)-H(34B)   | 109.5    |
| H(34A)-C(34)-H(34B) | 109.5    |
| O(4)-C(34)-H(34C)   | 109.5    |
| H(34A)-C(34)-H(34C) | 109.5    |
| H(34B)-C(34)-H(34C) | 109.5    |
| C(36)-C(35)-C(40)   | 118.7(2) |
| C(36)-C(35)-C(25)   | 120.6(2) |
| C(40)-C(35)-C(25)   | 120.6(2) |
| C(37)-C(36)-C(35)   | 120.8(2) |
| C(37)-C(36)-H(36)   | 119.6    |
| C(35)-C(36)-H(36)   | 119.6    |
| C(38)-C(37)-C(36)   | 120.1(3) |
| C(38)-C(37)-H(37)   | 120.0    |
| C(36)-C(37)-H(37)   | 120.0    |
| C(37)-C(38)-C(39)   | 119.8(2) |
| C(37)-C(38)-H(38)   | 120.1    |
| C(39)-C(38)-H(38)   | 120.1    |
| C(38)-C(39)-C(40)   | 120.5(3) |
| C(38)-C(39)-H(39)   | 119.8    |
| C(40)-C(39)-H(39)   | 119.8    |
| C(39)-C(40)-C(35)   | 120.2(3) |
| C(39)-C(40)-H(40)   | 119.9    |
| C(35)-C(40)-H(40)   | 119.9    |
| C(46)-C(41)-C(42)   | 118.9(2) |
| C(46)-C(41)-C(26)   | 117.8(2) |
| C(42)-C(41)-C(26)   | 123.2(2) |
| C(43)-C(42)-C(41)   | 119.9(2) |
| C(43)-C(42)-H(42)   | 120.1    |
| C(41)-C(42)-H(42)   | 120.1    |
| C(44)-C(43)-C(42)   | 120.8(2) |
| C(44)-C(43)-H(43)   | 119.6    |
| C(42)-C(43)-H(43)   | 119.6    |
| C(43)-C(44)-C(45)   | 119.5(2) |
| C(43)-C(44)-H(44)   | 120.2    |
| C(45)-C(44)-H(44)   | 120.2    |
| C(46)-C(45)-C(44)   | 120.1(2) |
| C(46)-C(45)-H(45)   | 120.0    |
| C(44)-C(45)-H(45)   | 120.0    |

|                   |          |
|-------------------|----------|
| C(45)-C(46)-C(41) | 120.8(2) |
| C(45)-C(46)-H(46) | 119.6    |
| C(41)-C(46)-H(46) | 119.6    |
| Cl(1)-C(47)-Cl(3) | 111.0(2) |
| Cl(1)-C(47)-Cl(2) | 110.3(2) |
| Cl(3)-C(47)-Cl(2) | 109.8(2) |
| Cl(1)-C(47)-H(47) | 108.6    |
| Cl(3)-C(47)-H(47) | 108.6    |
| Cl(2)-C(47)-H(47) | 108.6    |

---

Symmetry transformations used to generate equivalent atoms:

**Table S8. Anisotropic displacement parameters ( $\text{\AA}^2 \times 10^3$ ) for i18108. The anisotropic displacement factor exponent takes the form:  $-2\pi^2 [ h^2 a^{*2} U^{11} + \dots + 2 h k a^* b^* U^{12} ]$**

|       | $U^{11}$ | $U^{22}$ | $U^{33}$ | $U^{23}$ | $U^{13}$ | $U^{12}$ |
|-------|----------|----------|----------|----------|----------|----------|
| Cl(1) | 52(1)    | 60(1)    | 38(1)    | -9(1)    | 8(1)     | -2(1)    |
| Cl(2) | 69(1)    | 47(1)    | 51(1)    | -3(1)    | 21(1)    | -5(1)    |
| Cl(3) | 67(1)    | 60(1)    | 41(1)    | 6(1)     | -6(1)    | 14(1)    |
| O(1)  | 13(1)    | 14(1)    | 28(1)    | 6(1)     | 0(1)     | -3(1)    |
| O(2)  | 15(1)    | 19(1)    | 20(1)    | 8(1)     | -3(1)    | -2(1)    |
| O(3)  | 44(1)    | 18(1)    | 19(1)    | -8(1)    | 13(1)    | -12(1)   |
| O(4)  | 28(1)    | 14(1)    | 19(1)    | 2(1)     | 8(1)     | -7(1)    |
| N(1)  | 12(1)    | 7(1)     | 15(1)    | 1(1)     | 1(1)     | 1(1)     |
| N(2)  | 11(1)    | 8(1)     | 16(1)    | 0(1)     | 1(1)     | 0(1)     |
| N(3)  | 13(1)    | 7(1)     | 15(1)    | 0(1)     | 3(1)     | -1(1)    |
| N(4)  | 12(1)    | 9(1)     | 15(1)    | 0(1)     | 3(1)     | 1(1)     |
| C(1)  | 12(1)    | 9(1)     | 14(1)    | -1(1)    | 2(1)     | 1(1)     |
| C(2)  | 11(1)    | 12(1)    | 13(1)    | -1(1)    | 1(1)     | 1(1)     |
| C(3)  | 10(1)    | 12(1)    | 15(1)    | 1(1)     | 1(1)     | 0(1)     |
| C(4)  | 11(1)    | 10(1)    | 14(1)    | -2(1)    | 1(1)     | 3(1)     |
| C(5)  | 12(1)    | 11(1)    | 16(1)    | 1(1)     | 0(1)     | 2(1)     |
| C(6)  | 12(1)    | 10(1)    | 21(1)    | -2(1)    | 4(1)     | 0(1)     |
| C(7)  | 11(1)    | 13(1)    | 18(1)    | -1(1)    | -1(1)    | 1(1)     |
| C(8)  | 15(1)    | 10(1)    | 15(1)    | 0(1)     | 1(1)     | 3(1)     |
| C(9)  | 13(1)    | 11(1)    | 18(1)    | 1(1)     | 1(1)     | 0(1)     |
| C(10) | 20(1)    | 17(1)    | 30(2)    | 10(1)    | 2(1)     | -3(1)    |
| C(11) | 20(1)    | 20(1)    | 27(2)    | 11(1)    | -2(1)    | -4(1)    |
| C(12) | 14(1)    | 13(1)    | 13(1)    | 2(1)     | -1(1)    | -1(1)    |
| C(13) | 17(1)    | 14(1)    | 18(1)    | -2(1)    | 0(1)     | -1(1)    |
| C(14) | 23(1)    | 15(1)    | 23(1)    | -3(1)    | -1(1)    | -4(1)    |
| C(15) | 21(1)    | 21(1)    | 23(1)    | 0(1)     | -3(1)    | -10(1)   |
| C(16) | 14(1)    | 23(1)    | 22(1)    | 1(1)     | 2(1)     | -2(1)    |
| C(17) | 15(1)    | 13(1)    | 20(1)    | 0(1)     | 0(1)     | -1(1)    |
| C(18) | 11(1)    | 15(1)    | 21(1)    | 6(1)     | 4(1)     | 1(1)     |
| C(19) | 16(1)    | 23(1)    | 23(1)    | 7(1)     | -1(1)    | -2(1)    |
| C(20) | 17(1)    | 40(2)    | 27(2)    | 17(1)    | -1(1)    | -2(1)    |
| C(21) | 14(1)    | 33(2)    | 41(2)    | 26(1)    | 8(1)     | 7(1)     |
| C(22) | 16(1)    | 20(1)    | 42(2)    | 14(1)    | 12(1)    | 5(1)     |

|       |       |       |       |        |       |        |
|-------|-------|-------|-------|--------|-------|--------|
| C(23) | 13(1) | 16(1) | 29(2) | 6(1)   | 6(1)  | 4(1)   |
| C(24) | 11(1) | 7(1)  | 16(1) | 1(1)   | 0(1)  | 1(1)   |
| C(25) | 11(1) | 9(1)  | 14(1) | 0(1)   | 2(1)  | 1(1)   |
| C(26) | 12(1) | 11(1) | 13(1) | 1(1)   | 1(1)  | 1(1)   |
| C(27) | 12(1) | 11(1) | 15(1) | 1(1)   | 1(1)  | 1(1)   |
| C(28) | 16(1) | 12(1) | 18(1) | -2(1)  | 4(1)  | -2(1)  |
| C(29) | 20(1) | 16(1) | 17(1) | -3(1)  | 2(1)  | -1(1)  |
| C(30) | 20(1) | 18(1) | 14(1) | 2(1)   | 4(1)  | -1(1)  |
| C(31) | 15(1) | 13(1) | 18(1) | 4(1)   | 2(1)  | 0(1)   |
| C(32) | 15(1) | 11(1) | 15(1) | 1(1)   | 2(1)  | 0(1)   |
| C(33) | 67(2) | 19(2) | 32(2) | -12(1) | 23(2) | -21(2) |
| C(34) | 49(2) | 23(2) | 24(2) | -1(1)  | 9(1)  | -20(1) |
| C(35) | 17(1) | 7(1)  | 15(1) | 2(1)   | 1(1)  | 0(1)   |
| C(36) | 15(1) | 14(1) | 16(1) | 1(1)   | 2(1)  | -1(1)  |
| C(37) | 20(1) | 14(1) | 21(1) | 0(1)   | -3(1) | -2(1)  |
| C(38) | 29(2) | 14(1) | 16(1) | -3(1)  | 1(1)  | 1(1)   |
| C(39) | 23(1) | 18(1) | 21(1) | -3(1)  | 8(1)  | 2(1)   |
| C(40) | 17(1) | 15(1) | 19(1) | -3(1)  | 3(1)  | -2(1)  |
| C(41) | 13(1) | 7(1)  | 16(1) | -1(1)  | 4(1)  | 0(1)   |
| C(42) | 15(1) | 13(1) | 16(1) | 0(1)   | 1(1)  | -1(1)  |
| C(43) | 21(1) | 14(1) | 14(1) | 1(1)   | 3(1)  | 1(1)   |
| C(44) | 17(1) | 13(1) | 20(1) | 2(1)   | 7(1)  | -1(1)  |
| C(45) | 14(1) | 13(1) | 20(1) | -1(1)  | 1(1)  | -2(1)  |
| C(46) | 17(1) | 10(1) | 15(1) | 0(1)   | 3(1)  | 1(1)   |
| C(47) | 42(2) | 45(2) | 34(2) | -2(2)  | 7(2)  | 7(2)   |

---

## Crystal data and structure refinement for compound **3s**

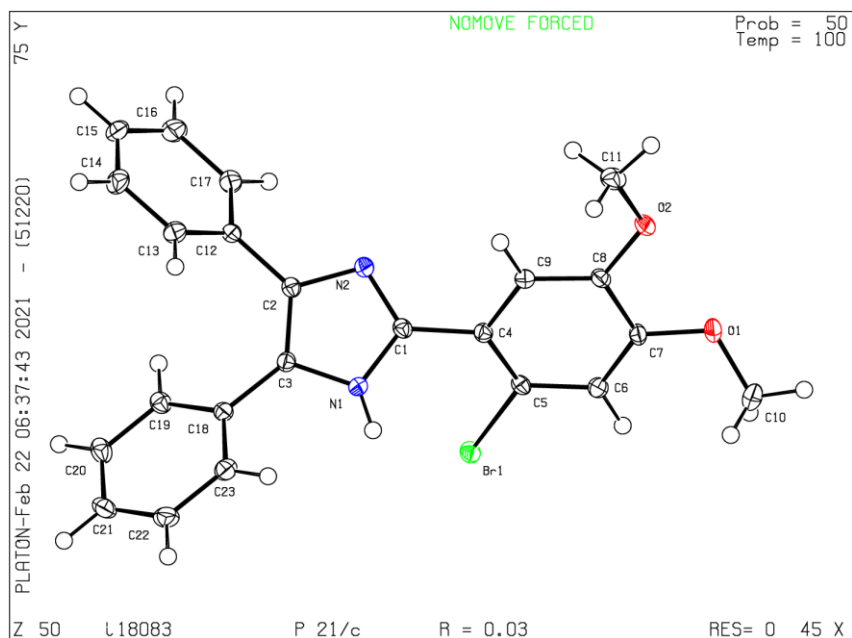

**Figure S3.** Single X-ray crystal structure of imidazole **3s** (the thermal ellipsoid was drawn at the 50% probability level)

**Table S9. Crystal data and structure refinement for i18083.**

|                                 |                                                                  |                                |
|---------------------------------|------------------------------------------------------------------|--------------------------------|
| CCDC                            | 2082025                                                          |                                |
| Identification code             | i18083                                                           |                                |
| Empirical formula               | C <sub>23</sub> H <sub>19</sub> Br N <sub>2</sub> O <sub>2</sub> |                                |
| Formula weight                  | 435.31                                                           |                                |
| Temperature                     | 100.0(2) K                                                       |                                |
| Wavelength                      | 0.71073 Å                                                        |                                |
| Crystal system                  | Monoclinic                                                       |                                |
| Space group                     | P 21/c                                                           |                                |
| Unit cell dimensions            | a = 9.2089(2) Å                                                  | $\alpha = 90^\circ$ .          |
|                                 | b = 19.8306(3) Å                                                 | $\beta = 101.4920(10)^\circ$ . |
|                                 | c = 10.4519(2) Å                                                 | $\gamma = 90^\circ$ .          |
| Volume                          | 1870.44(6) Å <sup>3</sup>                                        |                                |
| Z                               | 4                                                                |                                |
| Density (calculated)            | 1.546 Mg/m <sup>3</sup>                                          |                                |
| Absorption coefficient          | 2.220 mm <sup>-1</sup>                                           |                                |
| F(000)                          | 888                                                              |                                |
| Crystal size                    | 0.201 x 0.185 x 0.095 mm <sup>3</sup>                            |                                |
| Theta range for data collection | 2.054 to 30.518°.                                                |                                |
| Index ranges                    | -13 ≤ h ≤ 13, -28 ≤ k ≤ 28, -14 ≤ l ≤ 14                         |                                |

|                                   |                                             |
|-----------------------------------|---------------------------------------------|
| Reflections collected             | 78302                                       |
| Independent reflections           | 5710 [R(int) = 0.0527]                      |
| Completeness to theta = 25.242°   | 99.9 %                                      |
| Absorption correction             | Numerical                                   |
| Max. and min. transmission        | 1 and 0.9203                                |
| Refinement method                 | Full-matrix least-squares on F <sup>2</sup> |
| Data / restraints / parameters    | 5710 / 0 / 259                              |
| Goodness-of-fit on F <sup>2</sup> | 1.036                                       |
| Final R indices [I>2sigma(I)]     | R1 = 0.0262, wR2 = 0.0562                   |
| R indices (all data)              | R1 = 0.0366, wR2 = 0.0603                   |
| Extinction coefficient            | n/a                                         |
| Largest diff. peak and hole       | 0.457 and -0.365 e.Å <sup>-3</sup>          |

**Table S10. Atomic coordinates (  $\times 10^4$ ) and equivalent isotropic displacement parameters ( $\text{\AA}^2 \times 10^3$ ) for i18083.  $U(\text{eq})$  is defined as one third of the trace of the orthogonalized  $U^{ij}$  tensor.**

|       | x       | y       | z       | U(eq) |
|-------|---------|---------|---------|-------|
| Br(1) | 671(1)  | 7092(1) | 3732(1) | 16(1) |
| O(1)  | 3529(1) | 9029(1) | 6611(1) | 19(1) |
| O(2)  | 4595(1) | 8243(1) | 8533(1) | 17(1) |
| N(1)  | 2709(1) | 5839(1) | 5063(1) | 14(1) |
| N(2)  | 2329(1) | 5853(1) | 7092(1) | 14(1) |
| C(1)  | 2592(2) | 6225(1) | 6114(1) | 13(1) |
| C(2)  | 2251(2) | 5196(1) | 6637(1) | 13(1) |
| C(3)  | 2482(2) | 5177(1) | 5370(1) | 13(1) |
| C(4)  | 2763(2) | 6963(1) | 6164(1) | 13(1) |
| C(5)  | 2085(2) | 7404(1) | 5192(1) | 13(1) |
| C(6)  | 2344(2) | 8097(1) | 5282(1) | 14(1) |
| C(7)  | 3225(2) | 8361(1) | 6399(1) | 14(1) |
| C(8)  | 3845(2) | 7929(1) | 7434(1) | 14(1) |
| C(9)  | 3647(2) | 7240(1) | 7296(1) | 14(1) |
| C(10) | 3483(2) | 9441(1) | 5488(2) | 30(1) |
| C(11) | 5575(2) | 7836(1) | 9459(1) | 19(1) |
| C(12) | 1942(2) | 4633(1) | 7460(1) | 14(1) |
| C(13) | 2765(2) | 4037(1) | 7535(1) | 18(1) |
| C(14) | 2457(2) | 3501(1) | 8299(2) | 22(1) |
| C(15) | 1339(2) | 3558(1) | 9008(2) | 24(1) |
| C(16) | 531(2)  | 4153(1) | 8953(2) | 25(1) |
| C(17) | 819(2)  | 4685(1) | 8178(2) | 20(1) |
| C(18) | 2430(2) | 4629(1) | 4416(1) | 13(1) |
| C(19) | 1336(2) | 4133(1) | 4320(1) | 16(1) |
| C(20) | 1237(2) | 3621(1) | 3395(1) | 19(1) |
| C(21) | 2233(2) | 3601(1) | 2561(1) | 22(1) |
| C(22) | 3326(2) | 4090(1) | 2648(2) | 22(1) |
| C(23) | 3432(2) | 4604(1) | 3570(1) | 19(1) |



**Table S11. Bond lengths [Å] and angles [°] for i18083.**

---

|              |            |
|--------------|------------|
| Br(1)-C(5)   | 1.9022(13) |
| O(1)-C(7)    | 1.3634(16) |
| O(1)-C(10)   | 1.4237(19) |
| O(2)-C(8)    | 1.3675(16) |
| O(2)-C(11)   | 1.4328(17) |
| N(1)-C(1)    | 1.3611(17) |
| N(1)-C(3)    | 1.3780(17) |
| N(1)-H(1)    | 0.85(2)    |
| N(2)-C(1)    | 1.3220(18) |
| N(2)-C(2)    | 1.3839(17) |
| C(1)-C(4)    | 1.4716(18) |
| C(2)-C(3)    | 1.3835(19) |
| C(2)-C(12)   | 1.4714(19) |
| C(3)-C(18)   | 1.4700(18) |
| C(4)-C(5)    | 1.3896(18) |
| C(4)-C(9)    | 1.4073(18) |
| C(5)-C(6)    | 1.3960(18) |
| C(6)-C(7)    | 1.3838(19) |
| C(6)-H(6)    | 0.9500     |
| C(7)-C(8)    | 1.4093(19) |
| C(8)-C(9)    | 1.3807(18) |
| C(9)-H(9)    | 0.9500     |
| C(10)-H(10A) | 0.9800     |
| C(10)-H(10B) | 0.9800     |
| C(10)-H(10C) | 0.9800     |
| C(11)-H(11A) | 0.9800     |
| C(11)-H(11B) | 0.9800     |
| C(11)-H(11C) | 0.9800     |
| C(12)-C(17)  | 1.397(2)   |
| C(12)-C(13)  | 1.397(2)   |
| C(13)-C(14)  | 1.391(2)   |
| C(13)-H(13)  | 0.9500     |
| C(14)-C(15)  | 1.387(2)   |
| C(14)-H(14)  | 0.9500     |
| C(15)-C(16)  | 1.391(2)   |
| C(15)-H(15)  | 0.9500     |

|             |            |
|-------------|------------|
| C(16)-C(17) | 1.387(2)   |
| C(16)-H(16) | 0.9500     |
| C(17)-H(17) | 0.9500     |
| C(18)-C(19) | 1.3973(19) |
| C(18)-C(23) | 1.401(2)   |
| C(19)-C(20) | 1.3925(19) |
| C(19)-H(19) | 0.9500     |
| C(20)-C(21) | 1.387(2)   |
| C(20)-H(20) | 0.9500     |
| C(21)-C(22) | 1.388(2)   |
| C(21)-H(21) | 0.9500     |
| C(22)-C(23) | 1.392(2)   |
| C(22)-H(22) | 0.9500     |
| C(23)-H(23) | 0.9500     |

|                 |            |
|-----------------|------------|
| C(7)-O(1)-C(10) | 116.87(12) |
| C(8)-O(2)-C(11) | 117.14(11) |
| C(1)-N(1)-C(3)  | 107.92(12) |
| C(1)-N(1)-H(1)  | 125.0(13)  |
| C(3)-N(1)-H(1)  | 127.0(13)  |
| C(1)-N(2)-C(2)  | 105.44(11) |
| N(2)-C(1)-N(1)  | 111.47(12) |
| N(2)-C(1)-C(4)  | 124.27(12) |
| N(1)-C(1)-C(4)  | 124.26(12) |
| C(3)-C(2)-N(2)  | 110.25(12) |
| C(3)-C(2)-C(12) | 128.64(12) |
| N(2)-C(2)-C(12) | 121.11(12) |
| N(1)-C(3)-C(2)  | 104.92(12) |
| N(1)-C(3)-C(18) | 122.22(12) |
| C(2)-C(3)-C(18) | 132.74(12) |
| C(5)-C(4)-C(9)  | 117.99(12) |
| C(5)-C(4)-C(1)  | 124.72(12) |
| C(9)-C(4)-C(1)  | 117.28(12) |
| C(4)-C(5)-C(6)  | 121.63(12) |
| C(4)-C(5)-Br(1) | 121.21(10) |
| C(6)-C(5)-Br(1) | 117.05(10) |
| C(7)-C(6)-C(5)  | 119.51(12) |
| C(7)-C(6)-H(6)  | 120.2      |

|                     |            |
|---------------------|------------|
| C(5)-C(6)-H(6)      | 120.2      |
| O(1)-C(7)-C(6)      | 124.88(13) |
| O(1)-C(7)-C(8)      | 115.29(12) |
| C(6)-C(7)-C(8)      | 119.80(12) |
| O(2)-C(8)-C(9)      | 124.90(12) |
| O(2)-C(8)-C(7)      | 115.31(12) |
| C(9)-C(8)-C(7)      | 119.78(12) |
| C(8)-C(9)-C(4)      | 121.05(12) |
| C(8)-C(9)-H(9)      | 119.5      |
| C(4)-C(9)-H(9)      | 119.5      |
| O(1)-C(10)-H(10A)   | 109.5      |
| O(1)-C(10)-H(10B)   | 109.5      |
| H(10A)-C(10)-H(10B) | 109.5      |
| O(1)-C(10)-H(10C)   | 109.5      |
| H(10A)-C(10)-H(10C) | 109.5      |
| H(10B)-C(10)-H(10C) | 109.5      |
| O(2)-C(11)-H(11A)   | 109.5      |
| O(2)-C(11)-H(11B)   | 109.5      |
| H(11A)-C(11)-H(11B) | 109.5      |
| O(2)-C(11)-H(11C)   | 109.5      |
| H(11A)-C(11)-H(11C) | 109.5      |
| H(11B)-C(11)-H(11C) | 109.5      |
| C(17)-C(12)-C(13)   | 118.92(13) |
| C(17)-C(12)-C(2)    | 120.54(13) |
| C(13)-C(12)-C(2)    | 120.54(13) |
| C(14)-C(13)-C(12)   | 120.48(14) |
| C(14)-C(13)-H(13)   | 119.8      |
| C(12)-C(13)-H(13)   | 119.8      |
| C(15)-C(14)-C(13)   | 120.17(15) |
| C(15)-C(14)-H(14)   | 119.9      |
| C(13)-C(14)-H(14)   | 119.9      |
| C(14)-C(15)-C(16)   | 119.62(14) |
| C(14)-C(15)-H(15)   | 120.2      |
| C(16)-C(15)-H(15)   | 120.2      |
| C(17)-C(16)-C(15)   | 120.43(15) |
| C(17)-C(16)-H(16)   | 119.8      |
| C(15)-C(16)-H(16)   | 119.8      |
| C(16)-C(17)-C(12)   | 120.37(14) |

|                   |            |
|-------------------|------------|
| C(16)-C(17)-H(17) | 119.8      |
| C(12)-C(17)-H(17) | 119.8      |
| C(19)-C(18)-C(23) | 119.10(13) |
| C(19)-C(18)-C(3)  | 119.67(13) |
| C(23)-C(18)-C(3)  | 121.19(13) |
| C(20)-C(19)-C(18) | 120.64(14) |
| C(20)-C(19)-H(19) | 119.7      |
| C(18)-C(19)-H(19) | 119.7      |
| C(21)-C(20)-C(19) | 119.81(14) |
| C(21)-C(20)-H(20) | 120.1      |
| C(19)-C(20)-H(20) | 120.1      |
| C(20)-C(21)-C(22) | 120.09(14) |
| C(20)-C(21)-H(21) | 120.0      |
| C(22)-C(21)-H(21) | 120.0      |
| C(21)-C(22)-C(23) | 120.43(15) |
| C(21)-C(22)-H(22) | 119.8      |
| C(23)-C(22)-H(22) | 119.8      |
| C(22)-C(23)-C(18) | 119.93(14) |
| C(22)-C(23)-H(23) | 120.0      |
| C(18)-C(23)-H(23) | 120.0      |

---

Symmetry transformations used to generate equivalent atoms:

**Table S12. Anisotropic displacement parameters ( $\text{\AA}^2 \times 10^3$ ) for i18083. The anisotropic displacement factor exponent takes the form:  $-2\pi^2 [ h^2 a^{*2} U^{11} + \dots + 2 h k a^* b^* U^{12} ]$**

|       | $U^{11}$ | $U^{22}$ | $U^{33}$ | $U^{23}$ | $U^{13}$ | $U^{12}$ |
|-------|----------|----------|----------|----------|----------|----------|
| Br(1) | 16(1)    | 15(1)    | 14(1)    | -1(1)    | -2(1)    | -1(1)    |
| O(1)  | 27(1)    | 10(1)    | 19(1)    | -1(1)    | 2(1)     | -2(1)    |
| O(2)  | 20(1)    | 16(1)    | 13(1)    | -3(1)    | -1(1)    | -3(1)    |
| N(1)  | 17(1)    | 12(1)    | 13(1)    | 1(1)     | 5(1)     | -1(1)    |
| N(2)  | 14(1)    | 13(1)    | 13(1)    | -1(1)    | 2(1)     | -1(1)    |
| C(1)  | 13(1)    | 13(1)    | 13(1)    | -1(1)    | 0(1)     | 0(1)     |
| C(2)  | 13(1)    | 13(1)    | 13(1)    | -1(1)    | 2(1)     | 0(1)     |
| C(3)  | 14(1)    | 12(1)    | 14(1)    | 0(1)     | 2(1)     | -1(1)    |
| C(4)  | 13(1)    | 12(1)    | 14(1)    | -1(1)    | 5(1)     | 0(1)     |
| C(5)  | 13(1)    | 14(1)    | 12(1)    | -2(1)    | 0(1)     | -1(1)    |
| C(6)  | 16(1)    | 14(1)    | 14(1)    | 1(1)     | 2(1)     | 2(1)     |
| C(7)  | 16(1)    | 10(1)    | 16(1)    | -2(1)    | 5(1)     | -1(1)    |
| C(8)  | 14(1)    | 14(1)    | 12(1)    | -3(1)    | 3(1)     | -2(1)    |
| C(9)  | 15(1)    | 14(1)    | 12(1)    | 0(1)     | 2(1)     | 0(1)     |
| C(10) | 47(1)    | 16(1)    | 25(1)    | 3(1)     | 6(1)     | -9(1)    |
| C(11) | 18(1)    | 23(1)    | 15(1)    | -1(1)    | -1(1)    | -2(1)    |
| C(12) | 17(1)    | 14(1)    | 11(1)    | -1(1)    | 1(1)     | -3(1)    |
| C(13) | 19(1)    | 17(1)    | 16(1)    | 2(1)     | 1(1)     | 1(1)     |
| C(14) | 27(1)    | 17(1)    | 19(1)    | 5(1)     | -3(1)    | 0(1)     |
| C(15) | 36(1)    | 21(1)    | 14(1)    | 4(1)     | 1(1)     | -11(1)   |
| C(16) | 31(1)    | 26(1)    | 20(1)    | -2(1)    | 12(1)    | -10(1)   |
| C(17) | 23(1)    | 18(1)    | 19(1)    | -2(1)    | 8(1)     | -3(1)    |
| C(18) | 16(1)    | 12(1)    | 11(1)    | 1(1)     | 1(1)     | 3(1)     |
| C(19) | 15(1)    | 16(1)    | 15(1)    | -1(1)    | 1(1)     | 1(1)     |
| C(20) | 20(1)    | 16(1)    | 19(1)    | -2(1)    | -4(1)    | 0(1)     |
| C(21) | 35(1)    | 18(1)    | 12(1)    | -2(1)    | 0(1)     | 7(1)     |
| C(22) | 33(1)    | 20(1)    | 16(1)    | 1(1)     | 10(1)    | 7(1)     |
| C(23) | 24(1)    | 16(1)    | 18(1)    | 2(1)     | 7(1)     | 2(1)     |

## Crystal data and structure refinement for compound **3w**

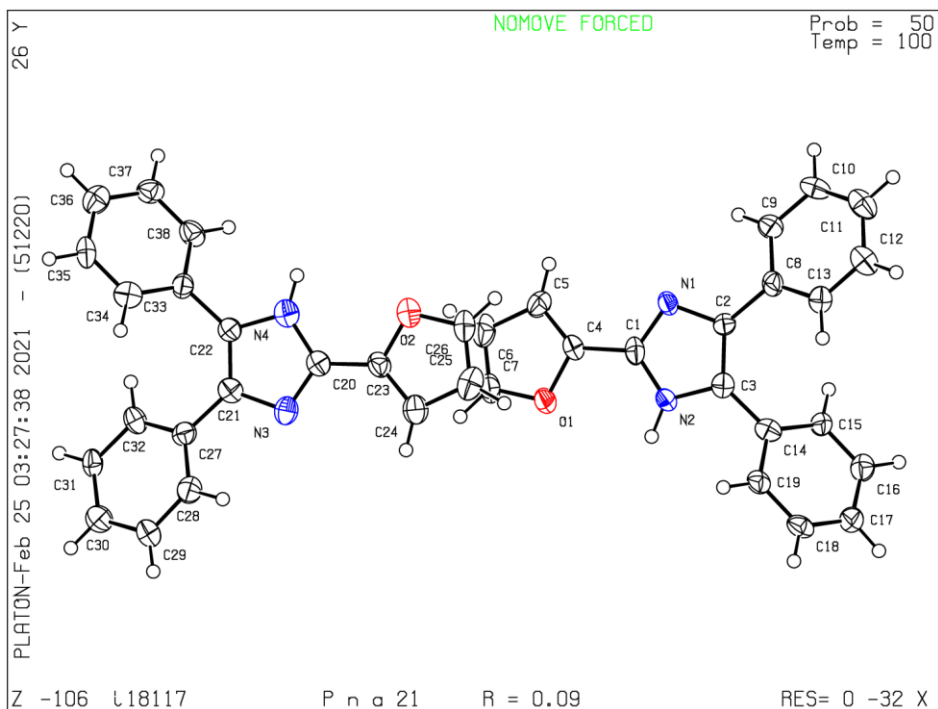

**Figure S4.** Single X-ray crystal structure of imidazole **3w** (the thermal ellipsoid was drawn at the 50% probability level)

**Table S13. Crystal data and structure refinement for i18117.**

|                                 |                                                               |          |
|---------------------------------|---------------------------------------------------------------|----------|
| CCDC                            | 2082032                                                       |          |
| Identification code             | i18117                                                        |          |
| Empirical formula               | C <sub>38</sub> H <sub>28</sub> N <sub>4</sub> O <sub>2</sub> |          |
| Formula weight                  | 572.64                                                        |          |
| Temperature                     | 100.0(2) K                                                    |          |
| Wavelength                      | 1.54178 Å                                                     |          |
| Crystal system                  | Orthorhombic                                                  |          |
| Space group                     | P n a 21                                                      |          |
| Unit cell dimensions            | a = 8.9585(4) Å                                               | α = 90°. |
|                                 | b = 11.3947(5) Å                                              | β = 90°. |
|                                 | c = 28.7859(13) Å                                             | γ = 90°. |
| Volume                          | 2938.4(2) Å <sup>3</sup>                                      |          |
| Z                               | 4                                                             |          |
| Density (calculated)            | 1.294 Mg/m <sup>3</sup>                                       |          |
| Absorption coefficient          | 0.644 mm <sup>-1</sup>                                        |          |
| F(000)                          | 1200                                                          |          |
| Crystal size                    | 0.320 x 0.090 x 0.060 mm <sup>3</sup>                         |          |
| Theta range for data collection | 3.070 to 66.595°.                                             |          |

|                                   |                                             |
|-----------------------------------|---------------------------------------------|
| Index ranges                      | -10<=h<=9, -13<=k<=13, -33<=l<=34           |
| Reflections collected             | 27891                                       |
| Independent reflections           | 5125 [R(int) = 0.1401]                      |
| Completeness to theta = 66.595°   | 99.7 %                                      |
| Absorption correction             | Semi-empirical from equivalents             |
| Max. and min. transmission        | 0.7528 and 0.6024                           |
| Refinement method                 | Full-matrix least-squares on F <sup>2</sup> |
| Data / restraints / parameters    | 5125 / 1 / 403                              |
| Goodness-of-fit on F <sup>2</sup> | 1.017                                       |
| Final R indices [I>2sigma(I)]     | R1 = 0.0871, wR2 = 0.2137                   |
| R indices (all data)              | R1 = 0.1249, wR2 = 0.2411                   |
| Absolute structure parameter      | 0.1(4)                                      |
| Extinction coefficient            | n/a                                         |
| Largest diff. peak and hole       | 0.550 and -0.323 e.Å <sup>-3</sup>          |

**Table S14. Atomic coordinates (  $\times 10^4$ ) and equivalent isotropic displacement parameters ( $\text{\AA}^2 \times 10^3$ ) for i18117.  $U(\text{eq})$  is defined as one third of the trace of the orthogonalized  $U^{ij}$  tensor.**

|       | x         | y        | z       | U(eq) |
|-------|-----------|----------|---------|-------|
| O(1)  | 1603(7)   | 3907(5)  | 5150(2) | 36(2) |
| O(2)  | 5472(7)   | 6077(5)  | 4919(2) | 40(2) |
| N(1)  | 3283(8)   | 1445(6)  | 5762(2) | 28(2) |
| N(2)  | 1123(9)   | 2322(6)  | 5888(3) | 28(2) |
| N(3)  | 3780(9)   | 8541(7)  | 4306(2) | 34(2) |
| N(4)  | 5962(9)   | 7675(7)  | 4171(3) | 34(2) |
| C(1)  | 2351(10)  | 2299(8)  | 5627(3) | 33(2) |
| C(2)  | 2570(9)   | 889(7)   | 6133(3) | 25(2) |
| C(3)  | 1206(10)  | 1447(8)  | 6209(3) | 28(2) |
| C(4)  | 2628(10)  | 3023(7)  | 5219(3) | 31(2) |
| C(5)  | 3612(11)  | 2976(9)  | 4877(3) | 38(2) |
| C(6)  | 3227(12)  | 3909(10) | 4564(4) | 46(3) |
| C(7)  | 2011(11)  | 4432(9)  | 4741(4) | 42(2) |
| C(8)  | 3310(10)  | -78(7)   | 6384(3) | 31(2) |
| C(9)  | 4331(10)  | -788(8)  | 6145(3) | 34(2) |
| C(10) | 5026(10)  | -1699(8) | 6372(3) | 36(2) |
| C(11) | 4757(11)  | -1918(8) | 6840(4) | 42(2) |
| C(12) | 3749(11)  | -1208(8) | 7076(4) | 40(2) |
| C(13) | 3035(11)  | -311(8)  | 6852(3) | 31(2) |
| C(14) | -41(9)    | 1206(8)  | 6522(3) | 29(2) |
| C(15) | -585(10)  | 58(8)    | 6587(4) | 33(2) |
| C(16) | -1799(10) | -154(9)  | 6864(3) | 35(2) |
| C(17) | -2559(11) | 768(8)   | 7068(4) | 41(2) |
| C(18) | -2030(10) | 1905(8)  | 7021(3) | 34(2) |
| C(19) | -789(9)   | 2123(8)  | 6744(3) | 29(2) |
| C(20) | 4720(10)  | 7714(7)  | 4443(3) | 29(2) |
| C(21) | 4469(10)  | 9092(7)  | 3940(3) | 30(2) |
| C(22) | 5837(9)   | 8569(7)  | 3850(3) | 28(2) |
| C(23) | 4481(10)  | 6968(8)  | 4840(3) | 33(2) |
| C(24) | 3439(11)  | 6995(9)  | 5188(3) | 39(2) |
| C(25) | 3831(12)  | 6079(10) | 5505(4) | 46(3) |
| C(26) | 5028(12)  | 5545(8)  | 5324(3) | 39(2) |
| C(27) | 3673(10)  | 10069(8) | 3712(3) | 32(2) |



|       |          |          |         |       |
|-------|----------|----------|---------|-------|
| C(28) | 2642(11) | 10714(8) | 3959(4) | 38(2) |
| C(29) | 1827(11) | 11622(8) | 3764(3) | 41(2) |
| C(30) | 2067(11) | 11889(9) | 3286(3) | 39(2) |
| C(31) | 3109(10) | 11268(8) | 3036(3) | 32(2) |
| C(32) | 3911(11) | 10352(8) | 3247(3) | 32(2) |
| C(33) | 7041(10) | 8817(8)  | 3516(3) | 31(2) |
| C(34) | 7492(10) | 9985(8)  | 3427(3) | 34(2) |
| C(35) | 8664(11) | 10196(9) | 3134(3) | 36(2) |
| C(36) | 9441(11) | 9280(9)  | 2925(3) | 41(2) |
| C(37) | 8983(11) | 8128(8)  | 3011(3) | 35(2) |
| C(38) | 7807(10) | 7904(8)  | 3296(3) | 35(2) |

---

**Table S15. Bond lengths [ $\text{\AA}$ ] and angles [ $^\circ$ ] for i18117.**

---

|             |           |
|-------------|-----------|
| O(1)-C(7)   | 1.371(12) |
| O(1)-C(4)   | 1.377(10) |
| O(2)-C(23)  | 1.368(11) |
| O(2)-C(26)  | 1.372(11) |
| N(1)-C(1)   | 1.339(11) |
| N(1)-C(2)   | 1.398(11) |
| N(2)-C(1)   | 1.332(12) |
| N(2)-C(3)   | 1.361(12) |
| N(2)-H(2)   | 0.91(10)  |
| N(3)-C(20)  | 1.324(12) |
| N(3)-C(21)  | 1.374(11) |
| N(4)-C(20)  | 1.362(12) |
| N(4)-C(22)  | 1.380(12) |
| N(4)-H(4)   | 0.90(11)  |
| C(1)-C(4)   | 1.458(12) |
| C(2)-C(3)   | 1.395(12) |
| C(2)-C(8)   | 1.474(12) |
| C(3)-C(14)  | 1.461(12) |
| C(4)-C(5)   | 1.323(13) |
| C(5)-C(6)   | 1.435(15) |
| C(5)-H(5)   | 0.9500    |
| C(6)-C(7)   | 1.341(15) |
| C(6)-H(6)   | 0.9500    |
| C(7)-H(7)   | 0.9500    |
| C(8)-C(13)  | 1.397(12) |
| C(8)-C(9)   | 1.402(13) |
| C(9)-C(10)  | 1.375(12) |
| C(9)-H(9)   | 0.9500    |
| C(10)-C(11) | 1.389(14) |
| C(10)-H(10) | 0.9500    |
| C(11)-C(12) | 1.390(14) |
| C(11)-H(11) | 0.9500    |
| C(12)-C(13) | 1.367(13) |
| C(12)-H(12) | 0.9500    |
| C(13)-H(13) | 0.9500    |
| C(14)-C(19) | 1.397(12) |

|             |           |
|-------------|-----------|
| C(14)-C(15) | 1.408(12) |
| C(15)-C(16) | 1.369(13) |
| C(15)-H(15) | 0.9500    |
| C(16)-C(17) | 1.383(14) |
| C(16)-H(16) | 0.9500    |
| C(17)-C(18) | 1.386(13) |
| C(17)-H(17) | 0.9500    |
| C(18)-C(19) | 1.390(12) |
| C(18)-H(18) | 0.9500    |
| C(19)-H(19) | 0.9500    |
| C(20)-C(23) | 1.441(13) |
| C(21)-C(22) | 1.387(12) |
| C(21)-C(27) | 1.476(13) |
| C(22)-C(33) | 1.473(12) |
| C(23)-C(24) | 1.368(14) |
| C(24)-C(25) | 1.431(15) |
| C(24)-H(24) | 0.9500    |
| C(25)-C(26) | 1.339(15) |
| C(25)-H(25) | 0.9500    |
| C(26)-H(26) | 0.9500    |
| C(27)-C(28) | 1.378(13) |
| C(27)-C(32) | 1.392(13) |
| C(28)-C(29) | 1.386(13) |
| C(28)-H(28) | 0.9500    |
| C(29)-C(30) | 1.424(14) |
| C(29)-H(29) | 0.9500    |
| C(30)-C(31) | 1.376(13) |
| C(30)-H(30) | 0.9500    |
| C(31)-C(32) | 1.406(13) |
| C(31)-H(31) | 0.9500    |
| C(32)-H(32) | 0.9500    |
| C(33)-C(38) | 1.397(12) |
| C(33)-C(34) | 1.414(12) |
| C(34)-C(35) | 1.368(13) |
| C(34)-H(34) | 0.9500    |
| C(35)-C(36) | 1.392(14) |
| C(35)-H(35) | 0.9500    |
| C(36)-C(37) | 1.397(14) |

|                  |           |
|------------------|-----------|
| C(36)-H(36)      | 0.9500    |
| C(37)-C(38)      | 1.360(13) |
| C(37)-H(37)      | 0.9500    |
| C(38)-H(38)      | 0.9500    |
| C(7)-O(1)-C(4)   | 105.4(7)  |
| C(23)-O(2)-C(26) | 106.3(7)  |
| C(1)-N(1)-C(2)   | 105.4(7)  |
| C(1)-N(2)-C(3)   | 108.8(8)  |
| C(1)-N(2)-H(2)   | 125(6)    |
| C(3)-N(2)-H(2)   | 126(6)    |
| C(20)-N(3)-C(21) | 105.6(8)  |
| C(20)-N(4)-C(22) | 107.2(8)  |
| C(20)-N(4)-H(4)  | 130(7)    |
| C(22)-N(4)-H(4)  | 122(7)    |
| N(2)-C(1)-N(1)   | 111.5(8)  |
| N(2)-C(1)-C(4)   | 125.7(8)  |
| N(1)-C(1)-C(4)   | 122.6(8)  |
| C(3)-C(2)-N(1)   | 108.2(7)  |
| C(3)-C(2)-C(8)   | 131.2(8)  |
| N(1)-C(2)-C(8)   | 120.6(7)  |
| N(2)-C(3)-C(2)   | 106.1(8)  |
| N(2)-C(3)-C(14)  | 120.9(8)  |
| C(2)-C(3)-C(14)  | 132.8(8)  |
| C(5)-C(4)-O(1)   | 111.5(8)  |
| C(5)-C(4)-C(1)   | 133.7(9)  |
| O(1)-C(4)-C(1)   | 114.7(8)  |
| C(4)-C(5)-C(6)   | 106.0(9)  |
| C(4)-C(5)-H(5)   | 127.0     |
| C(6)-C(5)-H(5)   | 127.0     |
| C(7)-C(6)-C(5)   | 106.7(9)  |
| C(7)-C(6)-H(6)   | 126.7     |
| C(5)-C(6)-H(6)   | 126.7     |
| C(6)-C(7)-O(1)   | 110.4(9)  |
| C(6)-C(7)-H(7)   | 124.8     |
| O(1)-C(7)-H(7)   | 124.8     |
| C(13)-C(8)-C(9)  | 118.6(8)  |
| C(13)-C(8)-C(2)  | 122.4(8)  |

|                   |          |
|-------------------|----------|
| C(9)-C(8)-C(2)    | 119.0(8) |
| C(10)-C(9)-C(8)   | 119.9(9) |
| C(10)-C(9)-H(9)   | 120.0    |
| C(8)-C(9)-H(9)    | 120.0    |
| C(9)-C(10)-C(11)  | 121.1(9) |
| C(9)-C(10)-H(10)  | 119.5    |
| C(11)-C(10)-H(10) | 119.5    |
| C(10)-C(11)-C(12) | 118.9(9) |
| C(10)-C(11)-H(11) | 120.6    |
| C(12)-C(11)-H(11) | 120.6    |
| C(13)-C(12)-C(11) | 120.6(9) |
| C(13)-C(12)-H(12) | 119.7    |
| C(11)-C(12)-H(12) | 119.7    |
| C(12)-C(13)-C(8)  | 121.0(9) |
| C(12)-C(13)-H(13) | 119.5    |
| C(8)-C(13)-H(13)  | 119.5    |
| C(19)-C(14)-C(15) | 117.8(8) |
| C(19)-C(14)-C(3)  | 120.6(8) |
| C(15)-C(14)-C(3)  | 121.5(8) |
| C(16)-C(15)-C(14) | 121.2(9) |
| C(16)-C(15)-H(15) | 119.4    |
| C(14)-C(15)-H(15) | 119.4    |
| C(15)-C(16)-C(17) | 120.2(9) |
| C(15)-C(16)-H(16) | 119.9    |
| C(17)-C(16)-H(16) | 119.9    |
| C(16)-C(17)-C(18) | 120.1(9) |
| C(16)-C(17)-H(17) | 120.0    |
| C(18)-C(17)-H(17) | 120.0    |
| C(17)-C(18)-C(19) | 119.7(9) |
| C(17)-C(18)-H(18) | 120.1    |
| C(19)-C(18)-H(18) | 120.1    |
| C(18)-C(19)-C(14) | 120.9(8) |
| C(18)-C(19)-H(19) | 119.6    |
| C(14)-C(19)-H(19) | 119.6    |
| N(3)-C(20)-N(4)   | 111.8(8) |
| N(3)-C(20)-C(23)  | 124.2(8) |
| N(4)-C(20)-C(23)  | 124.0(8) |
| N(3)-C(21)-C(22)  | 110.1(8) |

|                   |          |
|-------------------|----------|
| N(3)-C(21)-C(27)  | 118.0(8) |
| C(22)-C(21)-C(27) | 131.9(8) |
| N(4)-C(22)-C(21)  | 105.3(8) |
| N(4)-C(22)-C(33)  | 121.3(8) |
| C(21)-C(22)-C(33) | 133.4(8) |
| O(2)-C(23)-C(24)  | 109.8(8) |
| O(2)-C(23)-C(20)  | 118.2(8) |
| C(24)-C(23)-C(20) | 131.9(9) |
| C(23)-C(24)-C(25) | 106.5(9) |
| C(23)-C(24)-H(24) | 126.8    |
| C(25)-C(24)-H(24) | 126.8    |
| C(26)-C(25)-C(24) | 106.1(9) |
| C(26)-C(25)-H(25) | 126.9    |
| C(24)-C(25)-H(25) | 126.9    |
| C(25)-C(26)-O(2)  | 111.3(9) |
| C(25)-C(26)-H(26) | 124.3    |
| O(2)-C(26)-H(26)  | 124.3    |
| C(28)-C(27)-C(32) | 118.4(9) |
| C(28)-C(27)-C(21) | 119.7(8) |
| C(32)-C(27)-C(21) | 121.9(8) |
| C(27)-C(28)-C(29) | 122.8(9) |
| C(27)-C(28)-H(28) | 118.6    |
| C(29)-C(28)-H(28) | 118.6    |
| C(28)-C(29)-C(30) | 118.1(9) |
| C(28)-C(29)-H(29) | 121.0    |
| C(30)-C(29)-H(29) | 121.0    |
| C(31)-C(30)-C(29) | 119.9(9) |
| C(31)-C(30)-H(30) | 120.0    |
| C(29)-C(30)-H(30) | 120.0    |
| C(30)-C(31)-C(32) | 120.1(8) |
| C(30)-C(31)-H(31) | 120.0    |
| C(32)-C(31)-H(31) | 120.0    |
| C(27)-C(32)-C(31) | 120.7(9) |
| C(27)-C(32)-H(32) | 119.7    |
| C(31)-C(32)-H(32) | 119.7    |
| C(38)-C(33)-C(34) | 118.6(8) |
| C(38)-C(33)-C(22) | 120.8(8) |
| C(34)-C(33)-C(22) | 120.5(8) |

|                   |          |
|-------------------|----------|
| C(35)-C(34)-C(33) | 119.8(9) |
| C(35)-C(34)-H(34) | 120.1    |
| C(33)-C(34)-H(34) | 120.1    |
| C(34)-C(35)-C(36) | 121.2(9) |
| C(34)-C(35)-H(35) | 119.4    |
| C(36)-C(35)-H(35) | 119.4    |
| C(35)-C(36)-C(37) | 118.7(9) |
| C(35)-C(36)-H(36) | 120.6    |
| C(37)-C(36)-H(36) | 120.6    |
| C(38)-C(37)-C(36) | 120.8(9) |
| C(38)-C(37)-H(37) | 119.6    |
| C(36)-C(37)-H(37) | 119.6    |
| C(37)-C(38)-C(33) | 120.8(8) |
| C(37)-C(38)-H(38) | 119.6    |
| C(33)-C(38)-H(38) | 119.6    |

---

Symmetry transformations used to generate equivalent atoms:

**Table S16. Anisotropic displacement parameters ( $\text{\AA}^2 \times 10^3$ ) for i18117. The anisotropic displacement factor exponent takes the form:  $-2\pi^2 [ h^2 a^{*2} U^{11} + \dots + 2 h k a^* b^* U^{12} ]$**

|       | U <sup>11</sup> | U <sup>22</sup> | U <sup>33</sup> | U <sup>23</sup> | U <sup>13</sup> | U <sup>12</sup> |
|-------|-----------------|-----------------|-----------------|-----------------|-----------------|-----------------|
| O(1)  | 33(3)           | 34(3)           | 41(4)           | 13(3)           | -2(3)           | 2(3)            |
| O(2)  | 46(4)           | 36(4)           | 40(4)           | 7(3)            | 0(3)            | -2(3)           |
| N(1)  | 30(4)           | 25(4)           | 29(4)           | 7(3)            | -2(3)           | 1(3)            |
| N(2)  | 30(4)           | 22(4)           | 31(4)           | 4(3)            | -1(3)           | 3(3)            |
| N(3)  | 38(5)           | 33(4)           | 32(4)           | 0(3)            | -1(3)           | -8(3)           |
| N(4)  | 42(5)           | 29(4)           | 31(4)           | -4(3)           | -3(4)           | -3(3)           |
| C(1)  | 37(5)           | 27(5)           | 34(5)           | 9(4)            | -3(4)           | -7(4)           |
| C(2)  | 18(4)           | 29(4)           | 29(5)           | 2(4)            | -5(3)           | -4(3)           |
| C(3)  | 35(5)           | 27(4)           | 24(4)           | -3(4)           | 0(4)            | -3(4)           |
| C(4)  | 36(5)           | 26(5)           | 31(5)           | 6(4)            | -2(4)           | 2(4)            |
| C(5)  | 41(5)           | 41(6)           | 32(5)           | 3(4)            | 11(4)           | 0(4)            |
| C(6)  | 47(6)           | 53(6)           | 37(5)           | 17(5)           | -6(5)           | -10(5)          |
| C(7)  | 40(6)           | 39(6)           | 48(6)           | 21(5)           | -2(5)           | -4(4)           |
| C(8)  | 29(5)           | 23(5)           | 41(5)           | 5(4)            | -1(4)           | -7(3)           |
| C(9)  | 36(5)           | 28(5)           | 38(5)           | -2(4)           | 3(4)            | 3(4)            |
| C(10) | 33(5)           | 31(5)           | 45(6)           | -9(4)           | -7(4)           | 10(4)           |
| C(11) | 41(5)           | 31(5)           | 55(6)           | 2(5)            | -21(5)          | -2(4)           |
| C(12) | 47(6)           | 32(5)           | 41(5)           | -1(4)           | -11(4)          | 2(4)            |
| C(13) | 39(5)           | 30(5)           | 26(5)           | -2(4)           | 0(4)            | -4(4)           |
| C(14) | 25(4)           | 31(5)           | 30(5)           | -5(4)           | -11(4)          | 1(4)            |
| C(15) | 34(5)           | 25(5)           | 40(5)           | 4(4)            | 10(4)           | 1(4)            |
| C(16) | 32(5)           | 37(5)           | 35(5)           | 5(4)            | -5(4)           | -6(4)           |
| C(17) | 31(5)           | 42(6)           | 50(6)           | 14(5)           | 3(4)            | 1(4)            |
| C(18) | 36(5)           | 36(5)           | 29(5)           | 0(4)            | -6(4)           | 12(4)           |
| C(19) | 26(4)           | 33(5)           | 29(5)           | 5(4)            | -8(4)           | 2(3)            |
| C(20) | 33(5)           | 25(4)           | 30(5)           | -4(4)           | -4(4)           | -3(4)           |
| C(21) | 37(5)           | 28(5)           | 25(4)           | -6(4)           | -3(4)           | 1(4)            |
| C(22) | 31(5)           | 24(4)           | 30(5)           | -4(4)           | 0(4)            | -2(3)           |
| C(23) | 34(5)           | 33(5)           | 31(5)           | 6(4)            | -5(4)           | 2(4)            |
| C(24) | 45(6)           | 40(5)           | 32(5)           | 3(5)            | -3(4)           | -2(4)           |
| C(25) | 49(6)           | 53(6)           | 36(5)           | 4(5)            | 0(5)            | -14(5)          |
| C(26) | 48(6)           | 36(5)           | 34(5)           | 10(4)           | -2(5)           | -9(5)           |
| C(27) | 30(5)           | 25(5)           | 40(5)           | -4(4)           | 5(4)            | -4(4)           |



|       |       |       |       |       |       |        |
|-------|-------|-------|-------|-------|-------|--------|
| C(28) | 39(6) | 38(5) | 37(5) | 3(4)  | 3(4)  | -2(4)  |
| C(29) | 44(6) | 36(5) | 43(6) | 10(4) | -1(5) | 5(4)   |
| C(30) | 40(5) | 39(5) | 39(5) | 1(4)  | -4(4) | 2(4)   |
| C(31) | 44(5) | 29(5) | 24(4) | 5(4)  | 1(4)  | -3(4)  |
| C(32) | 41(5) | 22(4) | 34(5) | -1(4) | -5(4) | -2(4)  |
| C(33) | 34(5) | 30(5) | 29(5) | 4(4)  | 3(4)  | -2(4)  |
| C(34) | 34(5) | 38(5) | 30(5) | -8(4) | -9(4) | -2(4)  |
| C(35) | 45(6) | 31(5) | 33(5) | 11(4) | -6(4) | -11(4) |
| C(36) | 39(6) | 49(6) | 35(5) | 1(5)  | 1(4)  | -5(4)  |
| C(37) | 38(5) | 38(5) | 30(5) | -5(4) | 2(4)  | 7(4)   |
| C(38) | 47(6) | 28(5) | 31(5) | -3(4) | -1(4) | 6(4)   |

### Crystal data and structure refinement for compound **4h**

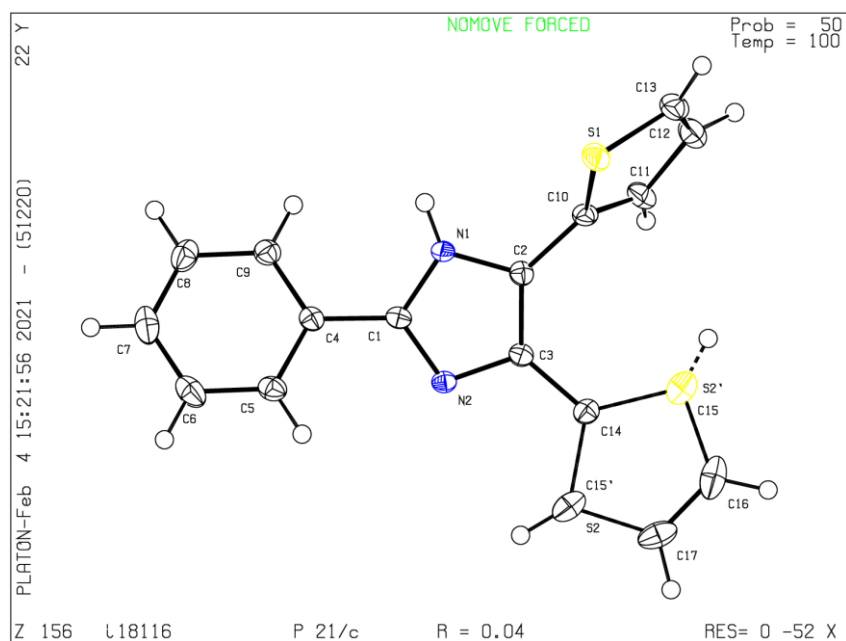

**Figure S5.** Single X-ray crystal structure of imidazole **4h** (the thermal ellipsoid was drawn at the 50% probability level)

### Table S17. Crystal data and structure refinement for **i18116**.

|                     |               |
|---------------------|---------------|
| CCDC                | 2082036       |
| Identification code | i18116        |
| Empirical formula   | C17 H12 N2 S2 |
| Formula weight      | 308.41        |
| Temperature         | 100.0(2) K    |
| Wavelength          | 0.71073 Å     |
| Crystal system      | Monoclinic    |

|                                   |                                             |                                |
|-----------------------------------|---------------------------------------------|--------------------------------|
| Space group                       | P 21/c                                      |                                |
| Unit cell dimensions              | a = 11.1404(4) Å                            | $\alpha = 90^\circ$ .          |
|                                   | b = 14.6012(6) Å                            | $\beta = 104.4970(10)^\circ$ . |
|                                   | c = 9.2447(3) Å                             | $\gamma = 90^\circ$ .          |
| Volume                            | 1455.89(9) Å <sup>3</sup>                   |                                |
| Z                                 | 4                                           |                                |
| Density (calculated)              | 1.407 Mg/m <sup>3</sup>                     |                                |
| Absorption coefficient            | 0.359 mm <sup>-1</sup>                      |                                |
| F(000)                            | 640                                         |                                |
| Crystal size                      | 0.210 x 0.160 x 0.058 mm <sup>3</sup>       |                                |
| Theta range for data collection   | 2.669 to 27.102°.                           |                                |
| Index ranges                      | -13<=h<=14, -18<=k<=18, -11<=l<=11          |                                |
| Reflections collected             | 42960                                       |                                |
| Independent reflections           | 3206 [R(int) = 0.0754]                      |                                |
| Completeness to theta = 25.242°   | 99.9 %                                      |                                |
| Absorption correction             | Numerical                                   |                                |
| Max. and min. transmission        | 1 and 0.9613                                |                                |
| Refinement method                 | Full-matrix least-squares on F <sup>2</sup> |                                |
| Data / restraints / parameters    | 3206 / 0 / 191                              |                                |
| Goodness-of-fit on F <sup>2</sup> | 1.049                                       |                                |
| Final R indices [I>2sigma(I)]     | R1 = 0.0427, wR2 = 0.0999                   |                                |
| R indices (all data)              | R1 = 0.0566, wR2 = 0.1065                   |                                |
| Extinction coefficient            | n/a                                         |                                |
| Largest diff. peak and hole       | 0.593 and -0.453 e.Å <sup>-3</sup>          |                                |

**Table S18. Atomic coordinates (  $\times 10^4$ ) and equivalent isotropic displacement parameters ( $\text{\AA}^2 \times 10^3$ ) for i18116.  $U(\text{eq})$  is defined as one third of the trace of the orthogonalized  $U^{ij}$  tensor.**

|        | x       | y       | z       | $U(\text{eq})$ |
|--------|---------|---------|---------|----------------|
| S(1)   | 3650(1) | 3829(1) | 9063(1) | 24(1)          |
| S(2)   | 4148(1) | 4670(1) | 2772(1) | 29(1)          |
| C(15)  | 2296(1) | 4673(1) | 4269(1) | 34(1)          |
| S(2')  | 2296(1) | 4673(1) | 4269(1) | 34(1)          |
| C(15') | 4148(1) | 4670(1) | 2772(1) | 29(1)          |
| N(1)   | 5217(2) | 2647(1) | 6984(2) | 16(1)          |
| N(2)   | 5418(1) | 3202(1) | 4828(2) | 15(1)          |
| C(1)   | 5913(2) | 2659(1) | 5978(2) | 15(1)          |
| C(2)   | 4213(2) | 3213(1) | 6462(2) | 16(1)          |
| C(3)   | 4354(2) | 3557(1) | 5123(2) | 16(1)          |
| C(4)   | 7067(2) | 2138(1) | 6133(2) | 16(1)          |
| C(5)   | 7933(2) | 2442(2) | 5378(2) | 21(1)          |
| C(6)   | 9021(2) | 1964(2) | 5494(2) | 28(1)          |
| C(7)   | 9280(2) | 1193(2) | 6387(3) | 30(1)          |
| C(8)   | 8436(2) | 886(2)  | 7146(2) | 26(1)          |
| C(9)   | 7320(2) | 1351(1) | 7011(2) | 20(1)          |
| C(10)  | 3274(2) | 3351(1) | 7298(2) | 18(1)          |
| C(11)  | 2032(2) | 3115(2) | 6872(2) | 24(1)          |
| C(12)  | 1413(2) | 3327(2) | 8010(3) | 27(1)          |
| C(13)  | 2166(2) | 3705(2) | 9238(2) | 25(1)          |
| C(14)  | 3623(2) | 4231(1) | 4113(2) | 18(1)          |
| C(16)  | 2118(2) | 5342(2) | 2856(3) | 34(1)          |
| C(17)  | 3036(2) | 5339(2) | 2142(2) | 29(1)          |

**Table S19. Bond lengths [ $\text{\AA}$ ] and angles [ $^\circ$ ] for i18116.**

---

|               |            |
|---------------|------------|
| S(1)-C(13)    | 1.710(2)   |
| S(1)-C(10)    | 1.7265(19) |
| S(2)-C(17)    | 1.571(3)   |
| S(2)-C(14)    | 1.629(2)   |
| C(15)-C(16)   | 1.603(3)   |
| C(15)-C(14)   | 1.653(2)   |
| C(15)-H(15)   | 0.9500     |
| S(2')-C(16)   | 1.603(3)   |
| S(2')-C(14)   | 1.653(2)   |
| C(15')-C(17)  | 1.571(3)   |
| C(15')-C(14)  | 1.629(2)   |
| C(15')-H(15') | 0.9500     |
| N(1)-C(1)     | 1.351(2)   |
| N(1)-C(2)     | 1.378(2)   |
| N(1)-H(1)     | 0.8800     |
| N(2)-C(1)     | 1.330(2)   |
| N(2)-C(3)     | 1.381(2)   |
| C(1)-C(4)     | 1.470(3)   |
| C(2)-C(3)     | 1.381(3)   |
| C(2)-C(10)    | 1.462(3)   |
| C(3)-C(14)    | 1.458(3)   |
| C(4)-C(9)     | 1.394(3)   |
| C(4)-C(5)     | 1.398(3)   |
| C(5)-C(6)     | 1.379(3)   |
| C(5)-H(5)     | 0.9500     |
| C(6)-C(7)     | 1.383(3)   |
| C(6)-H(6)     | 0.9500     |
| C(7)-C(8)     | 1.381(3)   |
| C(7)-H(7)     | 0.9500     |
| C(8)-C(9)     | 1.394(3)   |
| C(8)-H(8)     | 0.9500     |
| C(9)-H(9)     | 0.9500     |
| C(10)-C(11)   | 1.384(3)   |
| C(11)-C(12)   | 1.428(3)   |
| C(11)-H(11)   | 0.9500     |
| C(12)-C(13)   | 1.349(3)   |

|                     |            |
|---------------------|------------|
| C(12)-H(12)         | 0.9500     |
| C(13)-H(13)         | 0.9500     |
| C(16)-C(17)         | 1.349(4)   |
| C(16)-H(16)         | 0.9500     |
| C(17)-H(17)         | 0.9500     |
|                     |            |
| C(13)-S(1)-C(10)    | 92.01(10)  |
| C(17)-S(2)-C(14)    | 97.24(12)  |
| C(16)-C(15)-C(14)   | 95.60(12)  |
| C(16)-C(15)-H(15)   | 132.2      |
| C(14)-C(15)-H(15)   | 132.2      |
| C(16)-S(2')-C(14)   | 95.60(12)  |
| C(17)-C(15')-C(14)  | 97.24(12)  |
| C(17)-C(15')-H(15') | 131.4      |
| C(14)-C(15')-H(15') | 131.4      |
| C(1)-N(1)-C(2)      | 107.87(15) |
| C(1)-N(1)-H(1)      | 126.1      |
| C(2)-N(1)-H(1)      | 126.1      |
| C(1)-N(2)-C(3)      | 105.66(15) |
| N(2)-C(1)-N(1)      | 111.30(17) |
| N(2)-C(1)-C(4)      | 124.35(17) |
| N(1)-C(1)-C(4)      | 124.35(17) |
| N(1)-C(2)-C(3)      | 105.46(16) |
| N(1)-C(2)-C(10)     | 121.57(17) |
| C(3)-C(2)-C(10)     | 132.98(18) |
| C(2)-C(3)-N(2)      | 109.71(17) |
| C(2)-C(3)-C(14)     | 130.45(18) |
| N(2)-C(3)-C(14)     | 119.73(16) |
| C(9)-C(4)-C(5)      | 119.24(18) |
| C(9)-C(4)-C(1)      | 121.90(18) |
| C(5)-C(4)-C(1)      | 118.87(18) |
| C(6)-C(5)-C(4)      | 120.2(2)   |
| C(6)-C(5)-H(5)      | 119.9      |
| C(4)-C(5)-H(5)      | 119.9      |
| C(5)-C(6)-C(7)      | 120.5(2)   |
| C(5)-C(6)-H(6)      | 119.8      |
| C(7)-C(6)-H(6)      | 119.8      |
| C(8)-C(7)-C(6)      | 120.0(2)   |

|                    |            |
|--------------------|------------|
| C(8)-C(7)-H(7)     | 120.0      |
| C(6)-C(7)-H(7)     | 120.0      |
| C(7)-C(8)-C(9)     | 120.1(2)   |
| C(7)-C(8)-H(8)     | 119.9      |
| C(9)-C(8)-H(8)     | 119.9      |
| C(4)-C(9)-C(8)     | 120.0(2)   |
| C(4)-C(9)-H(9)     | 120.0      |
| C(8)-C(9)-H(9)     | 120.0      |
| C(11)-C(10)-C(2)   | 127.68(18) |
| C(11)-C(10)-S(1)   | 111.02(15) |
| C(2)-C(10)-S(1)    | 121.27(15) |
| C(10)-C(11)-C(12)  | 111.62(19) |
| C(10)-C(11)-H(11)  | 124.2      |
| C(12)-C(11)-H(11)  | 124.2      |
| C(13)-C(12)-C(11)  | 113.3(2)   |
| C(13)-C(12)-H(12)  | 123.4      |
| C(11)-C(12)-H(12)  | 123.4      |
| C(12)-C(13)-S(1)   | 112.07(16) |
| C(12)-C(13)-H(13)  | 124.0      |
| S(1)-C(13)-H(13)   | 124.0      |
| C(3)-C(14)-S(2)    | 120.27(15) |
| C(3)-C(14)-C(15')  | 120.27(15) |
| C(3)-C(14)-C(15)   | 125.21(15) |
| S(2)-C(14)-C(15)   | 114.37(12) |
| C(3)-C(14)-S(2')   | 125.21(15) |
| C(15')-C(14)-S(2') | 114.37(12) |
| C(17)-C(16)-C(15)  | 116.25(19) |
| C(17)-C(16)-S(2')  | 116.25(19) |
| C(17)-C(16)-H(16)  | 121.9      |
| C(15)-C(16)-H(16)  | 121.9      |
| C(16)-C(17)-S(2)   | 116.47(18) |
| C(16)-C(17)-C(15') | 116.47(18) |
| C(16)-C(17)-H(17)  | 121.8      |
| S(2)-C(17)-H(17)   | 121.8      |

---

Symmetry transformations used to generate equivalent atoms:

**Table S20. Anisotropic displacement parameters ( $\text{\AA}^2 \times 10^3$ ) for i18116. The anisotropic displacement factor exponent takes the form:  $-2\pi^2 [ h^2 a^{*2} U^{11} + \dots + 2 h k a^* b^* U^{12} ]$**

|        | $U^{11}$ | $U^{22}$ | $U^{33}$ | $U^{23}$ | $U^{13}$ | $U^{12}$ |
|--------|----------|----------|----------|----------|----------|----------|
| S(1)   | 26(1)    | 29(1)    | 19(1)    | -3(1)    | 8(1)     | 4(1)     |
| S(2)   | 36(1)    | 23(1)    | 23(1)    | 4(1)     | -1(1)    | 2(1)     |
| C(15)  | 32(1)    | 36(1)    | 32(1)    | 8(1)     | 4(1)     | 8(1)     |
| S(2')  | 32(1)    | 36(1)    | 32(1)    | 8(1)     | 4(1)     | 8(1)     |
| C(15') | 36(1)    | 23(1)    | 23(1)    | 4(1)     | -1(1)    | 2(1)     |
| N(1)   | 18(1)    | 18(1)    | 12(1)    | 1(1)     | 5(1)     | 1(1)     |
| N(2)   | 18(1)    | 16(1)    | 12(1)    | -1(1)    | 3(1)     | -1(1)    |
| C(1)   | 17(1)    | 16(1)    | 12(1)    | -2(1)    | 4(1)     | -4(1)    |
| C(2)   | 17(1)    | 18(1)    | 14(1)    | -3(1)    | 4(1)     | 0(1)     |
| C(3)   | 18(1)    | 17(1)    | 13(1)    | -3(1)    | 4(1)     | -1(1)    |
| C(4)   | 17(1)    | 19(1)    | 12(1)    | -4(1)    | 3(1)     | -1(1)    |
| C(5)   | 21(1)    | 26(1)    | 16(1)    | -1(1)    | 5(1)     | -2(1)    |
| C(6)   | 19(1)    | 40(1)    | 26(1)    | -5(1)    | 9(1)     | -4(1)    |
| C(7)   | 21(1)    | 38(1)    | 30(1)    | -9(1)    | 4(1)     | 8(1)     |
| C(8)   | 31(1)    | 23(1)    | 23(1)    | -1(1)    | 3(1)     | 8(1)     |
| C(9)   | 24(1)    | 20(1)    | 18(1)    | -1(1)    | 7(1)     | 1(1)     |
| C(10)  | 24(1)    | 18(1)    | 14(1)    | 0(1)     | 7(1)     | 2(1)     |
| C(11)  | 26(1)    | 27(1)    | 22(1)    | -2(1)    | 13(1)    | 0(1)     |
| C(12)  | 24(1)    | 28(1)    | 32(1)    | -1(1)    | 14(1)    | -1(1)    |
| C(13)  | 33(1)    | 23(1)    | 25(1)    | 0(1)     | 15(1)    | 4(1)     |
| C(14)  | 22(1)    | 18(1)    | 14(1)    | -2(1)    | 3(1)     | 1(1)     |
| C(16)  | 29(1)    | 31(1)    | 36(1)    | -10(1)   | -6(1)    | 11(1)    |
| C(17)  | 44(1)    | 22(1)    | 18(1)    | 1(1)     | 0(1)     | -6(1)    |

## Crystal data and structure refinement for compound **3z**

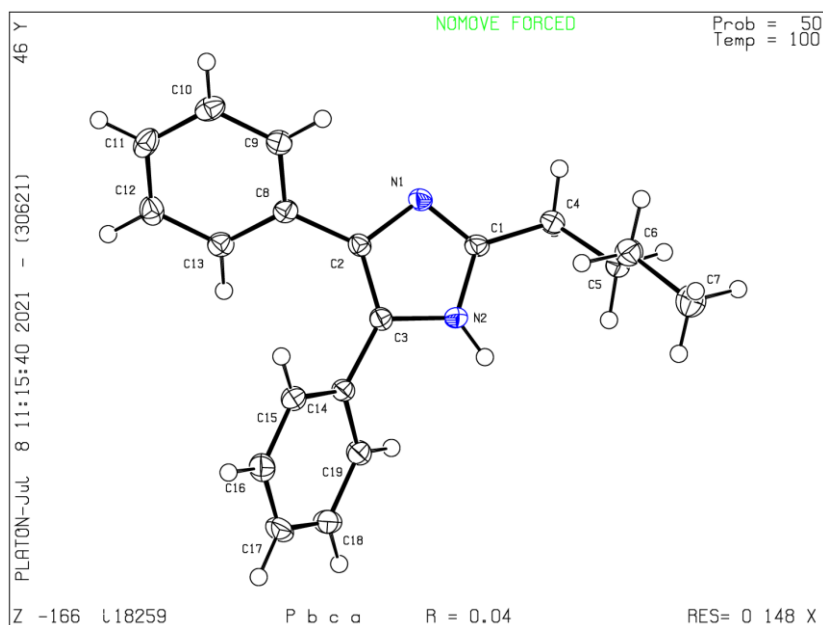

**Figure S6.** Single X-ray crystal structure of imidazole **3z** (the thermal ellipsoid was drawn at the 50% probability level)

### Table S21. Crystal data and structure refinement for **i18259**.

|                                 |                                                |          |
|---------------------------------|------------------------------------------------|----------|
| CCDC                            | 2098033                                        |          |
| Identification code             | i18259                                         |          |
| Empirical formula               | C <sub>19</sub> H <sub>20</sub> N <sub>2</sub> |          |
| Formula weight                  | 276.37                                         |          |
| Temperature                     | 100.0(2) K                                     |          |
| Wavelength                      | 0.71073 Å                                      |          |
| Crystal system                  | Orthorhombic                                   |          |
| Space group                     | P b c a                                        |          |
| Unit cell dimensions            | a = 16.5878(5) Å                               | α = 90°. |
|                                 | b = 9.2549(3) Å                                | β = 90°. |
|                                 | c = 20.0075(6) Å                               | γ = 90°. |
| Volume                          | 3071.52(16) Å <sup>3</sup>                     |          |
| Z                               | 8                                              |          |
| Density (calculated)            | 1.195 Mg/m <sup>3</sup>                        |          |
| Absorption coefficient          | 0.070 mm <sup>-1</sup>                         |          |
| F(000)                          | 1184                                           |          |
| Crystal size                    | 0.317 x 0.169 x 0.167 mm <sup>3</sup>          |          |
| Theta range for data collection | 2.036 to 27.101°.                              |          |
| Index ranges                    | -21 ≤ h ≤ 21, -11 ≤ k ≤ 11, -25 ≤ l ≤ 25       |          |
| Reflections collected           | 61188                                          |          |
| Independent reflections         | 3375 [R(int) = 0.0853]                         |          |



|                                   |                                             |
|-----------------------------------|---------------------------------------------|
| Completeness to theta = 25.242°   | 100.0 %                                     |
| Absorption correction             | Numerical                                   |
| Max. and min. transmission        | 1 and 0.8011                                |
| Refinement method                 | Full-matrix least-squares on F <sup>2</sup> |
| Data / restraints / parameters    | 3375 / 0 / 191                              |
| Goodness-of-fit on F <sup>2</sup> | 1.056                                       |
| Final R indices [I>2sigma(I)]     | R1 = 0.0398, wR2 = 0.0900                   |
| R indices (all data)              | R1 = 0.0529, wR2 = 0.0972                   |
| Extinction coefficient            | n/a                                         |
| Largest diff. peak and hole       | 0.240 and -0.210 e.Å <sup>-3</sup>          |

**Table S22. Atomic coordinates (  $\times 10^4$ ) and equivalent isotropic displacement parameters ( $\text{\AA}^2 \times 10^3$ ) for i18259.  $U(\text{eq})$  is defined as one third of the trace of the orthogonalized  $U^{ij}$  tensor.**

|       | x       | y       | z       | U(eq) |
|-------|---------|---------|---------|-------|
| N(1)  | 3099(1) | 6079(1) | 2710(1) | 18(1) |
| N(2)  | 2590(1) | 3912(1) | 2893(1) | 18(1) |
| C(1)  | 2505(1) | 5176(1) | 2563(1) | 18(1) |
| C(2)  | 3585(1) | 5355(1) | 3165(1) | 17(1) |
| C(3)  | 3279(1) | 3998(1) | 3281(1) | 17(1) |
| C(4)  | 1789(1) | 5538(1) | 2141(1) | 21(1) |
| C(5)  | 1495(1) | 4318(1) | 1688(1) | 21(1) |
| C(6)  | 2083(1) | 3931(2) | 1132(1) | 27(1) |
| C(7)  | 1795(1) | 2644(2) | 721(1)  | 34(1) |
| C(8)  | 4276(1) | 6111(1) | 3471(1) | 18(1) |
| C(9)  | 4732(1) | 7083(1) | 3093(1) | 21(1) |
| C(10) | 5367(1) | 7840(1) | 3379(1) | 24(1) |
| C(11) | 5560(1) | 7632(2) | 4046(1) | 25(1) |
| C(12) | 5109(1) | 6679(1) | 4428(1) | 24(1) |
| C(13) | 4470(1) | 5929(1) | 4146(1) | 21(1) |
| C(14) | 3537(1) | 2754(1) | 3684(1) | 18(1) |
| C(15) | 4348(1) | 2343(1) | 3715(1) | 21(1) |
| C(16) | 4576(1) | 1109(2) | 4061(1) | 26(1) |
| C(17) | 4000(1) | 265(2)  | 4381(1) | 28(1) |
| C(18) | 3198(1) | 677(2)  | 4362(1) | 25(1) |
| C(19) | 2966(1) | 1915(1) | 4020(1) | 21(1) |

**Table S23. Bond lengths [ $\text{\AA}$ ] and angles [ $^\circ$ ] for i18259.**

---

|             |            |
|-------------|------------|
| N(1)-C(1)   | 1.3252(17) |
| N(1)-C(2)   | 1.3889(16) |
| N(2)-C(1)   | 1.3501(16) |
| N(2)-C(3)   | 1.3831(16) |
| N(2)-H(2)   | 0.8800     |
| C(1)-C(4)   | 1.4960(18) |
| C(2)-C(3)   | 1.3748(17) |
| C(2)-C(8)   | 1.4746(18) |
| C(3)-C(14)  | 1.4697(17) |
| C(4)-C(5)   | 1.5278(18) |
| C(4)-H(4A)  | 0.9900     |
| C(4)-H(4AB) | 0.9900     |
| C(5)-C(6)   | 1.521(2)   |
| C(5)-H(5A)  | 0.9900     |
| C(5)-H(5AB) | 0.9900     |
| C(6)-C(7)   | 1.524(2)   |
| C(6)-H(6A)  | 0.9900     |
| C(6)-H(6AB) | 0.9900     |
| C(7)-H(7A)  | 0.9800     |
| C(7)-H(7B)  | 0.9800     |
| C(7)-H(7C)  | 0.9800     |
| C(8)-C(13)  | 1.3983(18) |
| C(8)-C(9)   | 1.3984(18) |
| C(9)-C(10)  | 1.3885(19) |
| C(9)-H(9)   | 0.9500     |
| C(10)-C(11) | 1.386(2)   |
| C(10)-H(10) | 0.9500     |
| C(11)-C(12) | 1.386(2)   |
| C(11)-H(11) | 0.9500     |
| C(12)-C(13) | 1.3874(19) |
| C(12)-H(12) | 0.9500     |
| C(13)-H(13) | 0.9500     |
| C(14)-C(19) | 1.3983(19) |
| C(14)-C(15) | 1.3998(19) |
| C(15)-C(16) | 1.3876(18) |
| C(15)-H(15) | 0.9500     |

|                   |            |
|-------------------|------------|
| C(16)-C(17)       | 1.390(2)   |
| C(16)-H(16)       | 0.9500     |
| C(17)-C(18)       | 1.384(2)   |
| C(17)-H(17)       | 0.9500     |
| C(18)-C(19)       | 1.3890(18) |
| C(18)-H(18)       | 0.9500     |
| C(19)-H(19)       | 0.9500     |
|                   |            |
| C(1)-N(1)-C(2)    | 105.83(10) |
| C(1)-N(2)-C(3)    | 108.05(11) |
| C(1)-N(2)-H(2)    | 126.0      |
| C(3)-N(2)-H(2)    | 126.0      |
| N(1)-C(1)-N(2)    | 111.16(11) |
| N(1)-C(1)-C(4)    | 125.05(11) |
| N(2)-C(1)-C(4)    | 123.56(12) |
| C(3)-C(2)-N(1)    | 109.61(11) |
| C(3)-C(2)-C(8)    | 130.63(11) |
| N(1)-C(2)-C(8)    | 119.63(11) |
| C(2)-C(3)-N(2)    | 105.34(11) |
| C(2)-C(3)-C(14)   | 134.39(12) |
| N(2)-C(3)-C(14)   | 120.25(11) |
| C(1)-C(4)-C(5)    | 114.98(11) |
| C(1)-C(4)-H(4A)   | 108.5      |
| C(5)-C(4)-H(4A)   | 108.5      |
| C(1)-C(4)-H(4AB)  | 108.5      |
| C(5)-C(4)-H(4AB)  | 108.5      |
| H(4A)-C(4)-H(4AB) | 107.5      |
| C(6)-C(5)-C(4)    | 113.79(11) |
| C(6)-C(5)-H(5A)   | 108.8      |
| C(4)-C(5)-H(5A)   | 108.8      |
| C(6)-C(5)-H(5AB)  | 108.8      |
| C(4)-C(5)-H(5AB)  | 108.8      |
| H(5A)-C(5)-H(5AB) | 107.7      |
| C(5)-C(6)-C(7)    | 112.17(12) |
| C(5)-C(6)-H(6A)   | 109.2      |
| C(7)-C(6)-H(6A)   | 109.2      |
| C(5)-C(6)-H(6AB)  | 109.2      |
| C(7)-C(6)-H(6AB)  | 109.2      |

|                   |            |
|-------------------|------------|
| H(6A)-C(6)-H(6AB) | 107.9      |
| C(6)-C(7)-H(7A)   | 109.5      |
| C(6)-C(7)-H(7B)   | 109.5      |
| H(7A)-C(7)-H(7B)  | 109.5      |
| C(6)-C(7)-H(7C)   | 109.5      |
| H(7A)-C(7)-H(7C)  | 109.5      |
| H(7B)-C(7)-H(7C)  | 109.5      |
| C(13)-C(8)-C(9)   | 118.37(12) |
| C(13)-C(8)-C(2)   | 121.48(12) |
| C(9)-C(8)-C(2)    | 120.08(11) |
| C(10)-C(9)-C(8)   | 120.85(13) |
| C(10)-C(9)-H(9)   | 119.6      |
| C(8)-C(9)-H(9)    | 119.6      |
| C(11)-C(10)-C(9)  | 120.08(13) |
| C(11)-C(10)-H(10) | 120.0      |
| C(9)-C(10)-H(10)  | 120.0      |
| C(10)-C(11)-C(12) | 119.70(13) |
| C(10)-C(11)-H(11) | 120.2      |
| C(12)-C(11)-H(11) | 120.2      |
| C(11)-C(12)-C(13) | 120.43(13) |
| C(11)-C(12)-H(12) | 119.8      |
| C(13)-C(12)-H(12) | 119.8      |
| C(12)-C(13)-C(8)  | 120.55(13) |
| C(12)-C(13)-H(13) | 119.7      |
| C(8)-C(13)-H(13)  | 119.7      |
| C(19)-C(14)-C(15) | 118.59(12) |
| C(19)-C(14)-C(3)  | 120.12(12) |
| C(15)-C(14)-C(3)  | 121.23(12) |
| C(16)-C(15)-C(14) | 120.52(13) |
| C(16)-C(15)-H(15) | 119.7      |
| C(14)-C(15)-H(15) | 119.7      |
| C(15)-C(16)-C(17) | 120.34(13) |
| C(15)-C(16)-H(16) | 119.8      |
| C(17)-C(16)-H(16) | 119.8      |
| C(18)-C(17)-C(16) | 119.57(13) |
| C(18)-C(17)-H(17) | 120.2      |
| C(16)-C(17)-H(17) | 120.2      |
| C(17)-C(18)-C(19) | 120.45(13) |

|                   |            |
|-------------------|------------|
| C(17)-C(18)-H(18) | 119.8      |
| C(19)-C(18)-H(18) | 119.8      |
| C(18)-C(19)-C(14) | 120.51(13) |
| C(18)-C(19)-H(19) | 119.7      |
| C(14)-C(19)-H(19) | 119.7      |

---

Symmetry transformations used to generate equivalent atoms:

**Table S24. Anisotropic displacement parameters ( $\text{\AA}^2 \times 10^3$ ) for i18259. The anisotropic displacement factor exponent takes the form:  $-2\pi^2 [ h^2 a^{*2} U^{11} + \dots + 2 h k a^* b^* U^{12} ]$**

|       | $U^{11}$ | $U^{22}$ | $U^{33}$ | $U^{23}$ | $U^{13}$ | $U^{12}$ |
|-------|----------|----------|----------|----------|----------|----------|
| N(1)  | 21(1)    | 15(1)    | 19(1)    | 0(1)     | -1(1)    | 2(1)     |
| N(2)  | 19(1)    | 14(1)    | 21(1)    | 1(1)     | -2(1)    | 0(1)     |
| C(1)  | 22(1)    | 14(1)    | 19(1)    | 0(1)     | -1(1)    | 2(1)     |
| C(2)  | 19(1)    | 16(1)    | 16(1)    | 0(1)     | -1(1)    | 2(1)     |
| C(3)  | 19(1)    | 16(1)    | 17(1)    | -1(1)    | -1(1)    | 2(1)     |
| C(4)  | 22(1)    | 17(1)    | 25(1)    | 2(1)     | -4(1)    | 2(1)     |
| C(5)  | 22(1)    | 18(1)    | 24(1)    | 3(1)     | -4(1)    | -1(1)    |
| C(6)  | 31(1)    | 25(1)    | 24(1)    | 0(1)     | -1(1)    | -2(1)    |
| C(7)  | 44(1)    | 31(1)    | 28(1)    | -5(1)    | -4(1)    | -1(1)    |
| C(8)  | 18(1)    | 14(1)    | 22(1)    | -2(1)    | 0(1)     | 3(1)     |
| C(9)  | 21(1)    | 19(1)    | 23(1)    | 0(1)     | 0(1)     | 2(1)     |
| C(10) | 21(1)    | 18(1)    | 34(1)    | -1(1)    | 3(1)     | 0(1)     |
| C(11) | 21(1)    | 20(1)    | 35(1)    | -8(1)    | -4(1)    | 1(1)     |
| C(12) | 27(1)    | 23(1)    | 22(1)    | -5(1)    | -5(1)    | 6(1)     |
| C(13) | 24(1)    | 17(1)    | 22(1)    | -2(1)    | 1(1)     | 2(1)     |
| C(14) | 24(1)    | 14(1)    | 16(1)    | -2(1)    | -2(1)    | 1(1)     |
| C(15) | 25(1)    | 17(1)    | 21(1)    | -2(1)    | -2(1)    | 1(1)     |
| C(16) | 29(1)    | 20(1)    | 28(1)    | -4(1)    | -7(1)    | 6(1)     |
| C(17) | 41(1)    | 17(1)    | 25(1)    | 2(1)     | -7(1)    | 5(1)     |
| C(18) | 36(1)    | 19(1)    | 22(1)    | 2(1)     | -1(1)    | -2(1)    |
| C(19) | 23(1)    | 20(1)    | 20(1)    | 0(1)     | -1(1)    | 1(1)     |

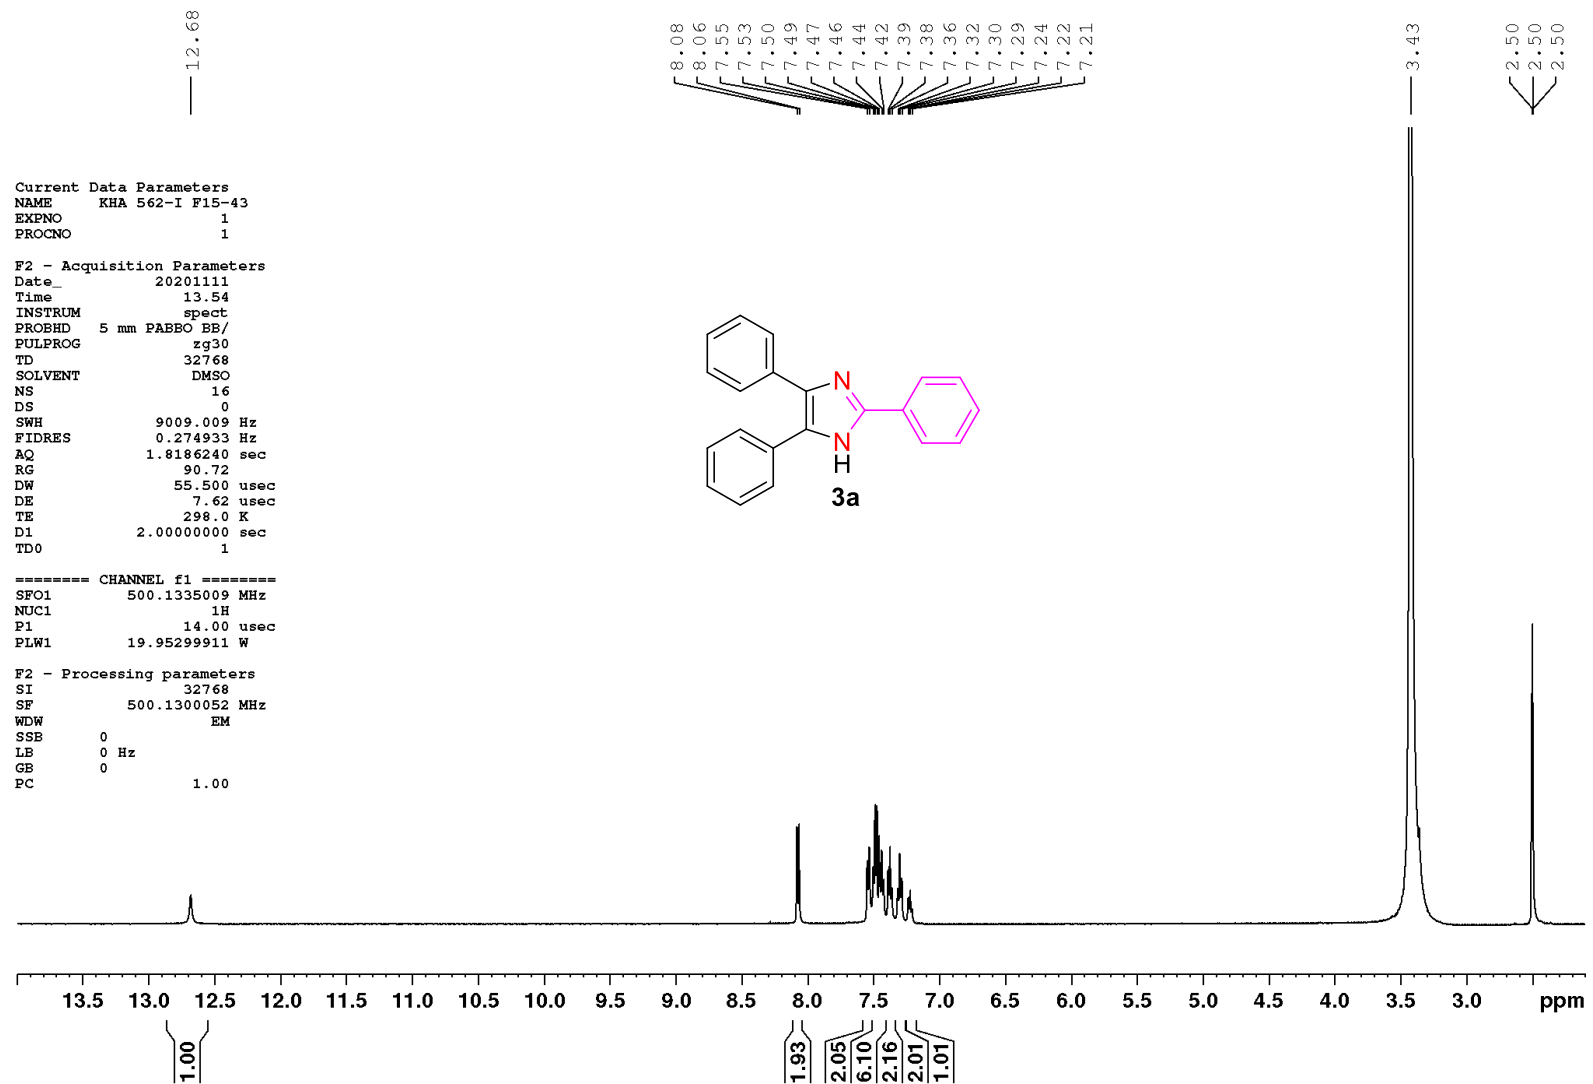

Figure S6.  $^1\text{H}$  NMR spectrum of compound **3a** (500 MHz,  $\text{DMSO-d}_6$ , 25  $^\circ\text{C}$ )



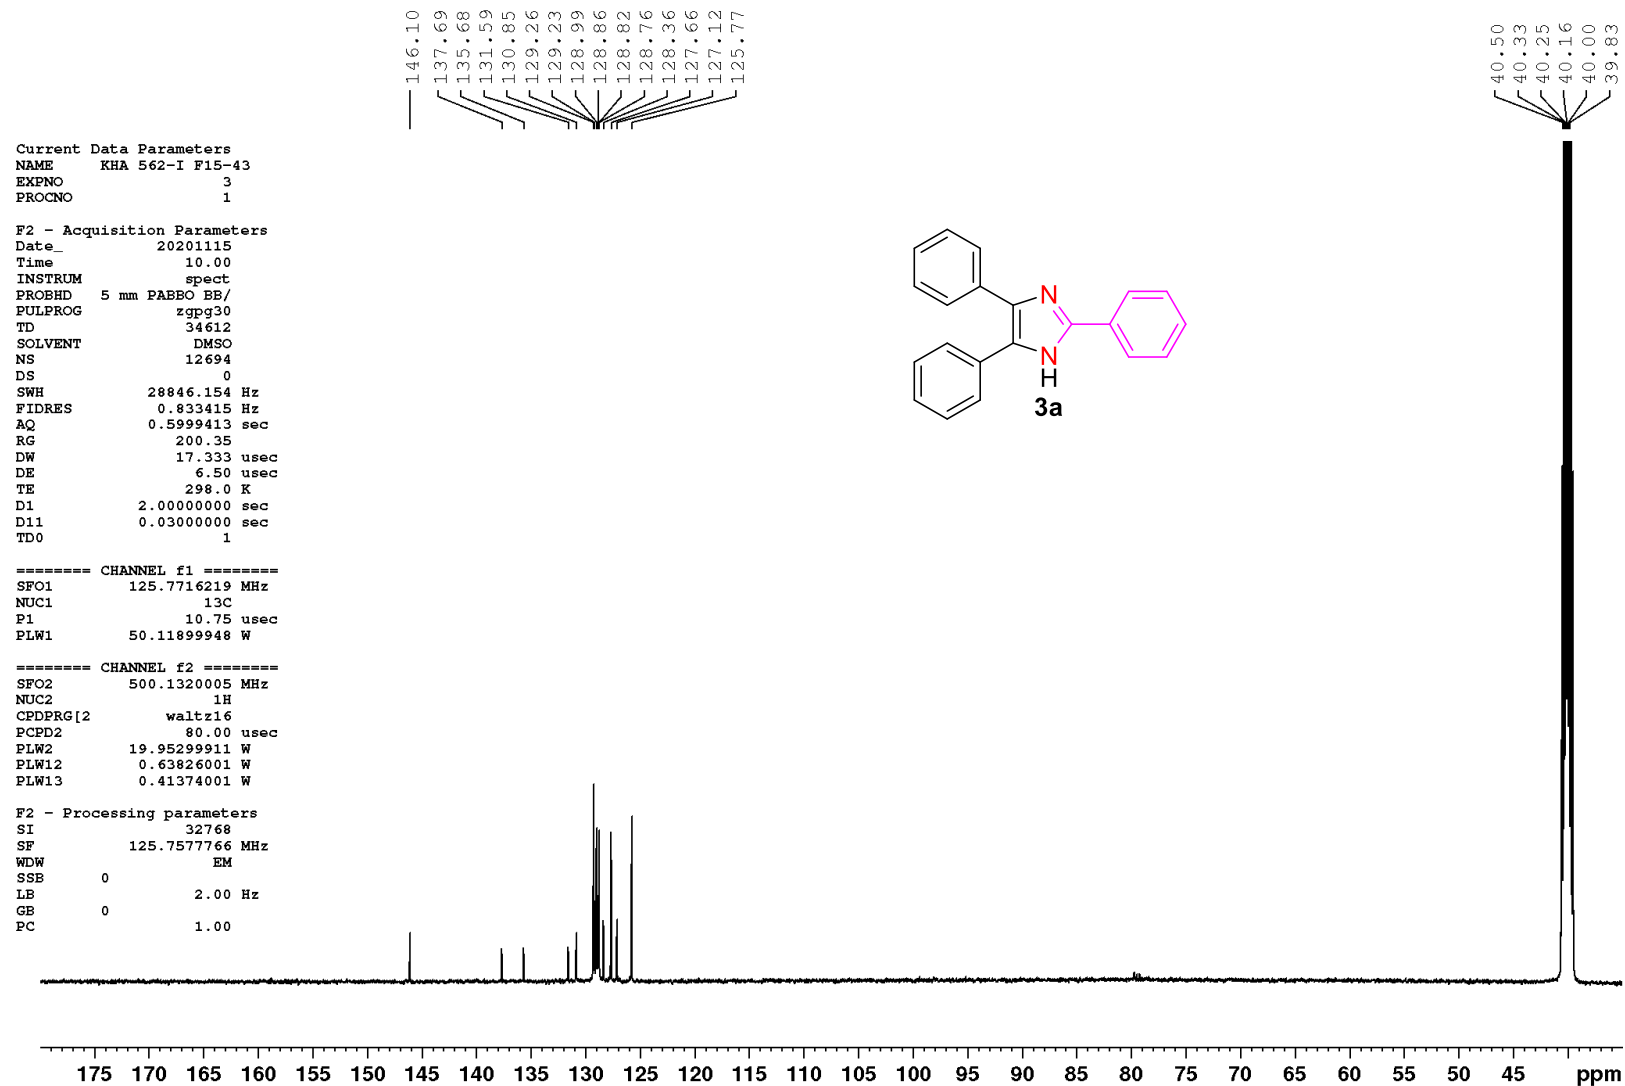

Figure S7.  $^{13}\text{C}$  NMR spectrum of compound **3a** (125 MHz, DMSO- $d_6$ , 25  $^{\circ}\text{C}$ )

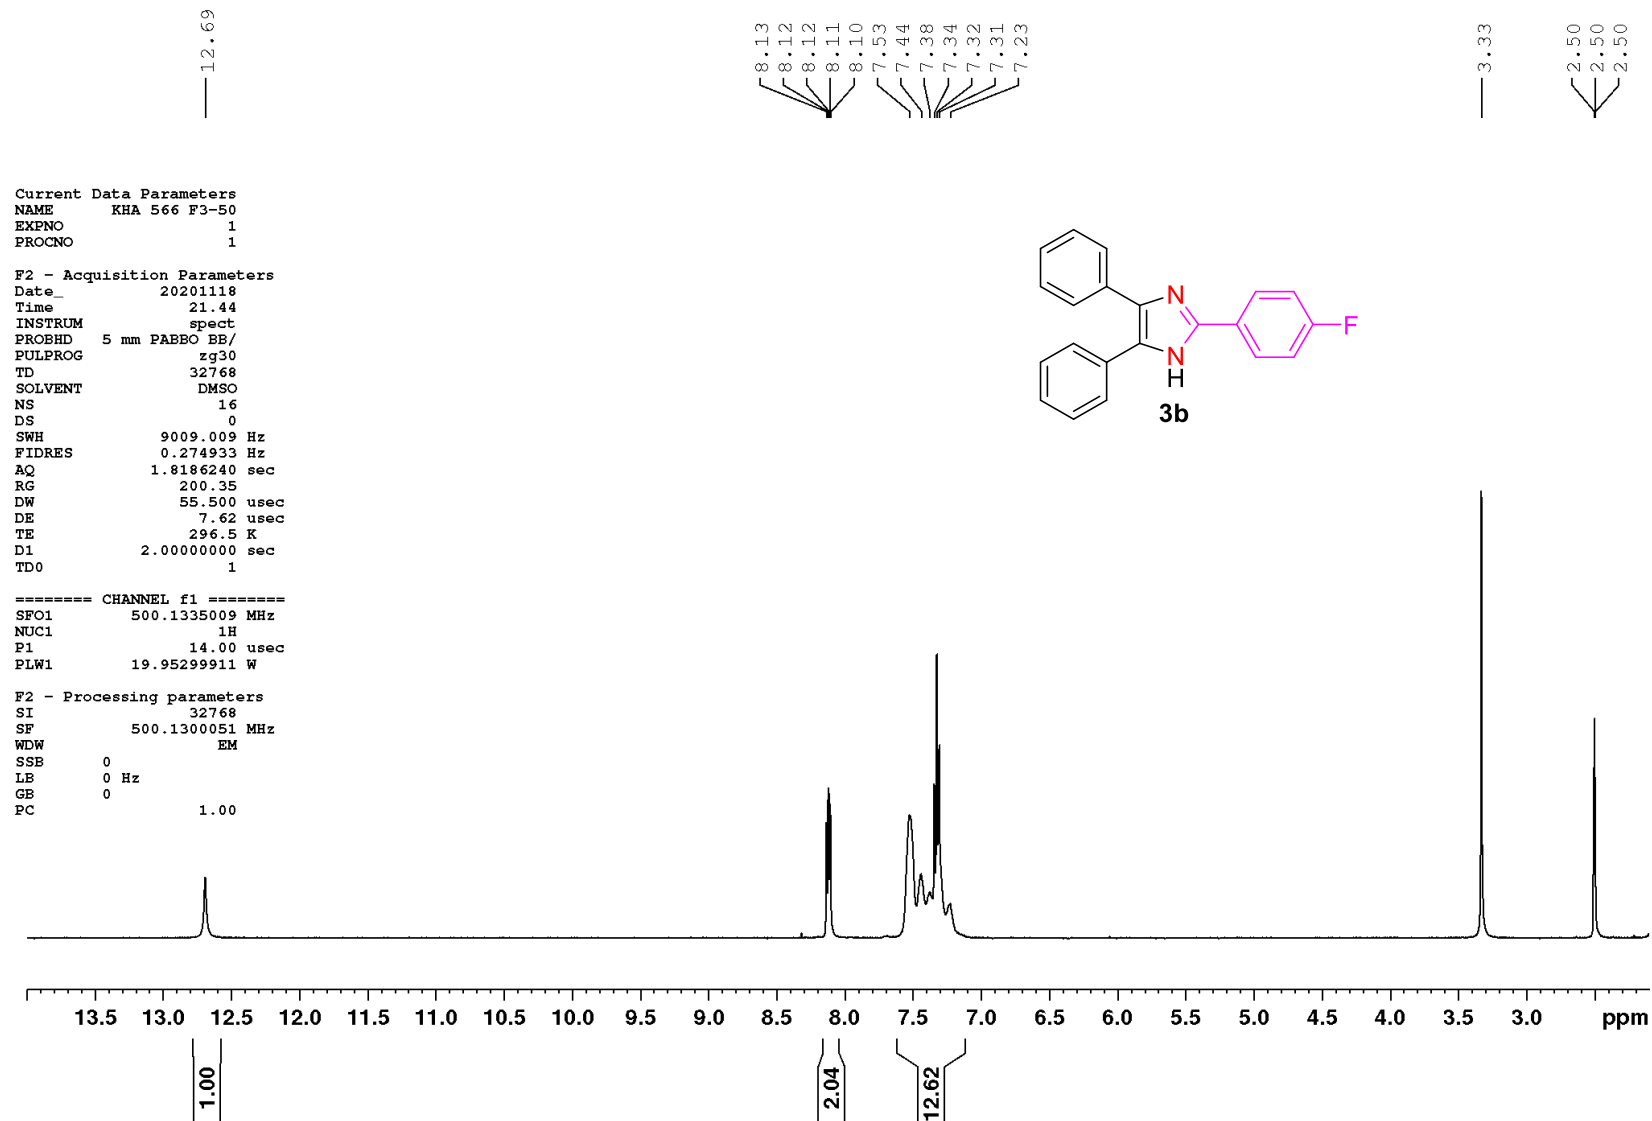

Figure S8.  $^1\text{H}$  NMR spectrum of compound **3b** (500 MHz, DMSO- $d_6$ , 25  $^\circ\text{C}$ )

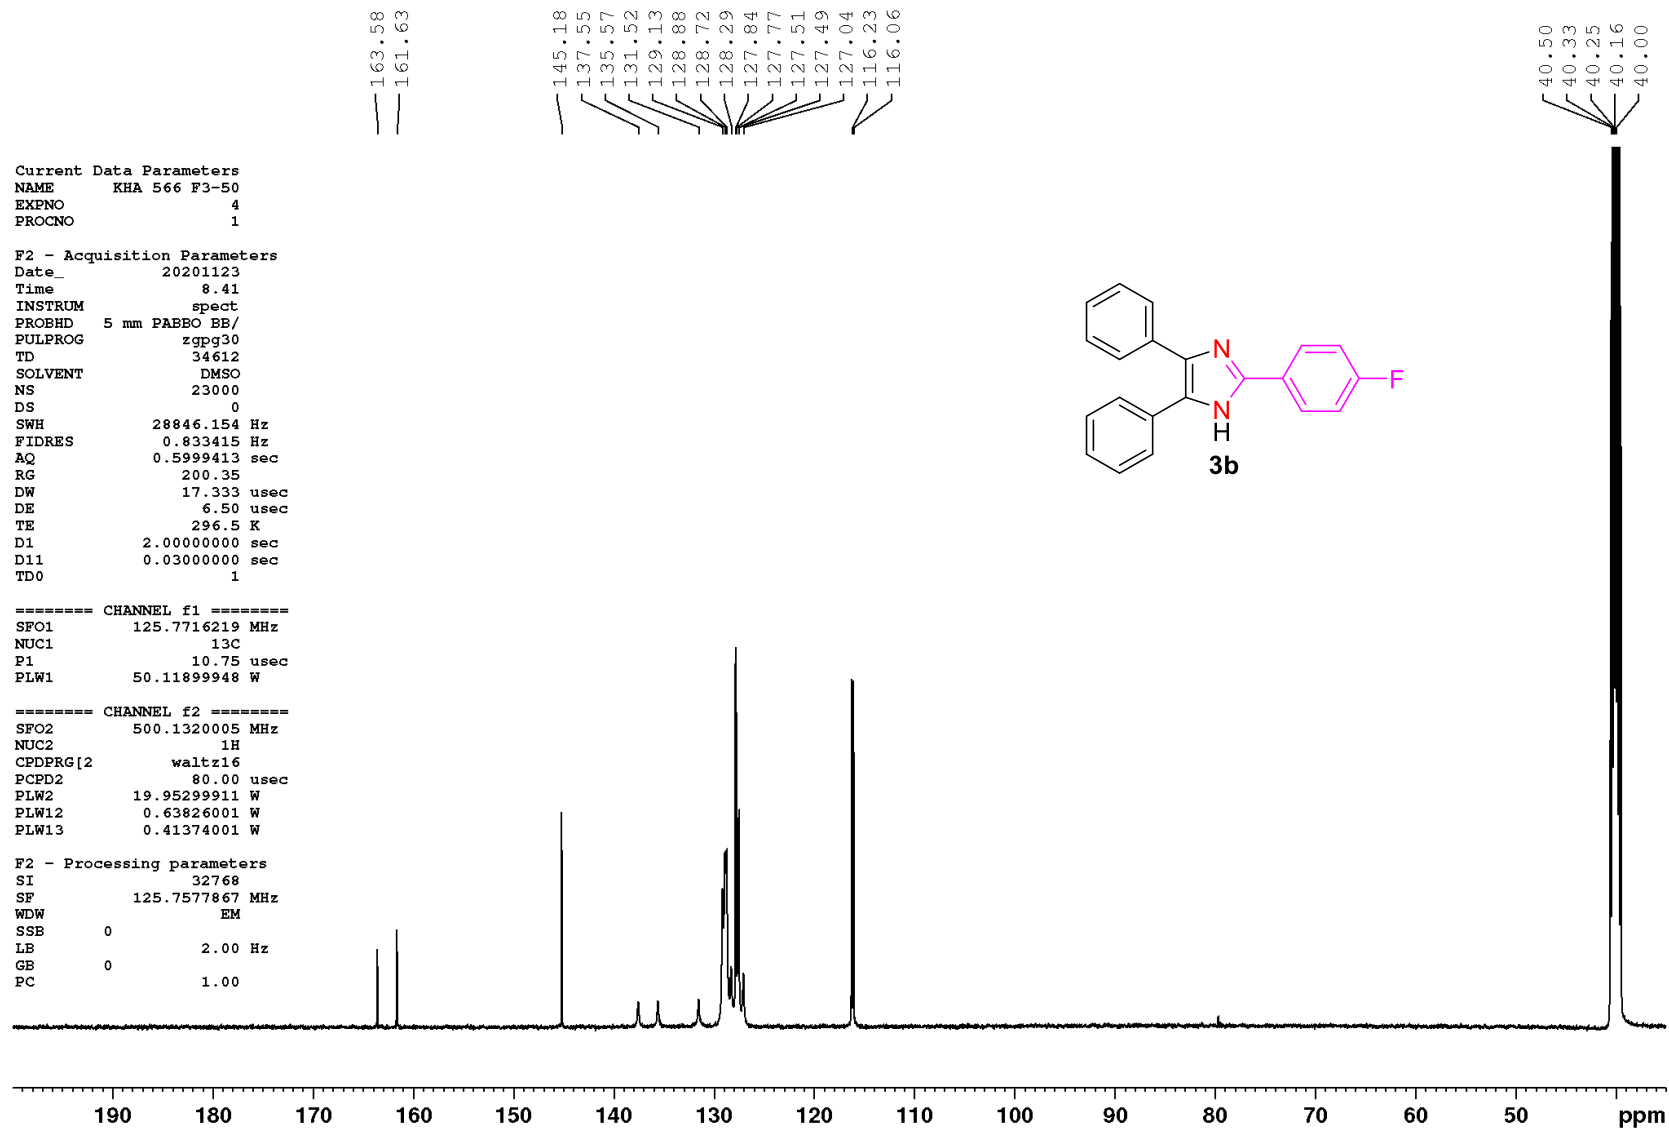

Figure S9.  $^{13}\text{C}$  NMR spectrum of compound **3b** (125 MHz, DMSO- $d_6$ , 25  $^{\circ}\text{C}$ )

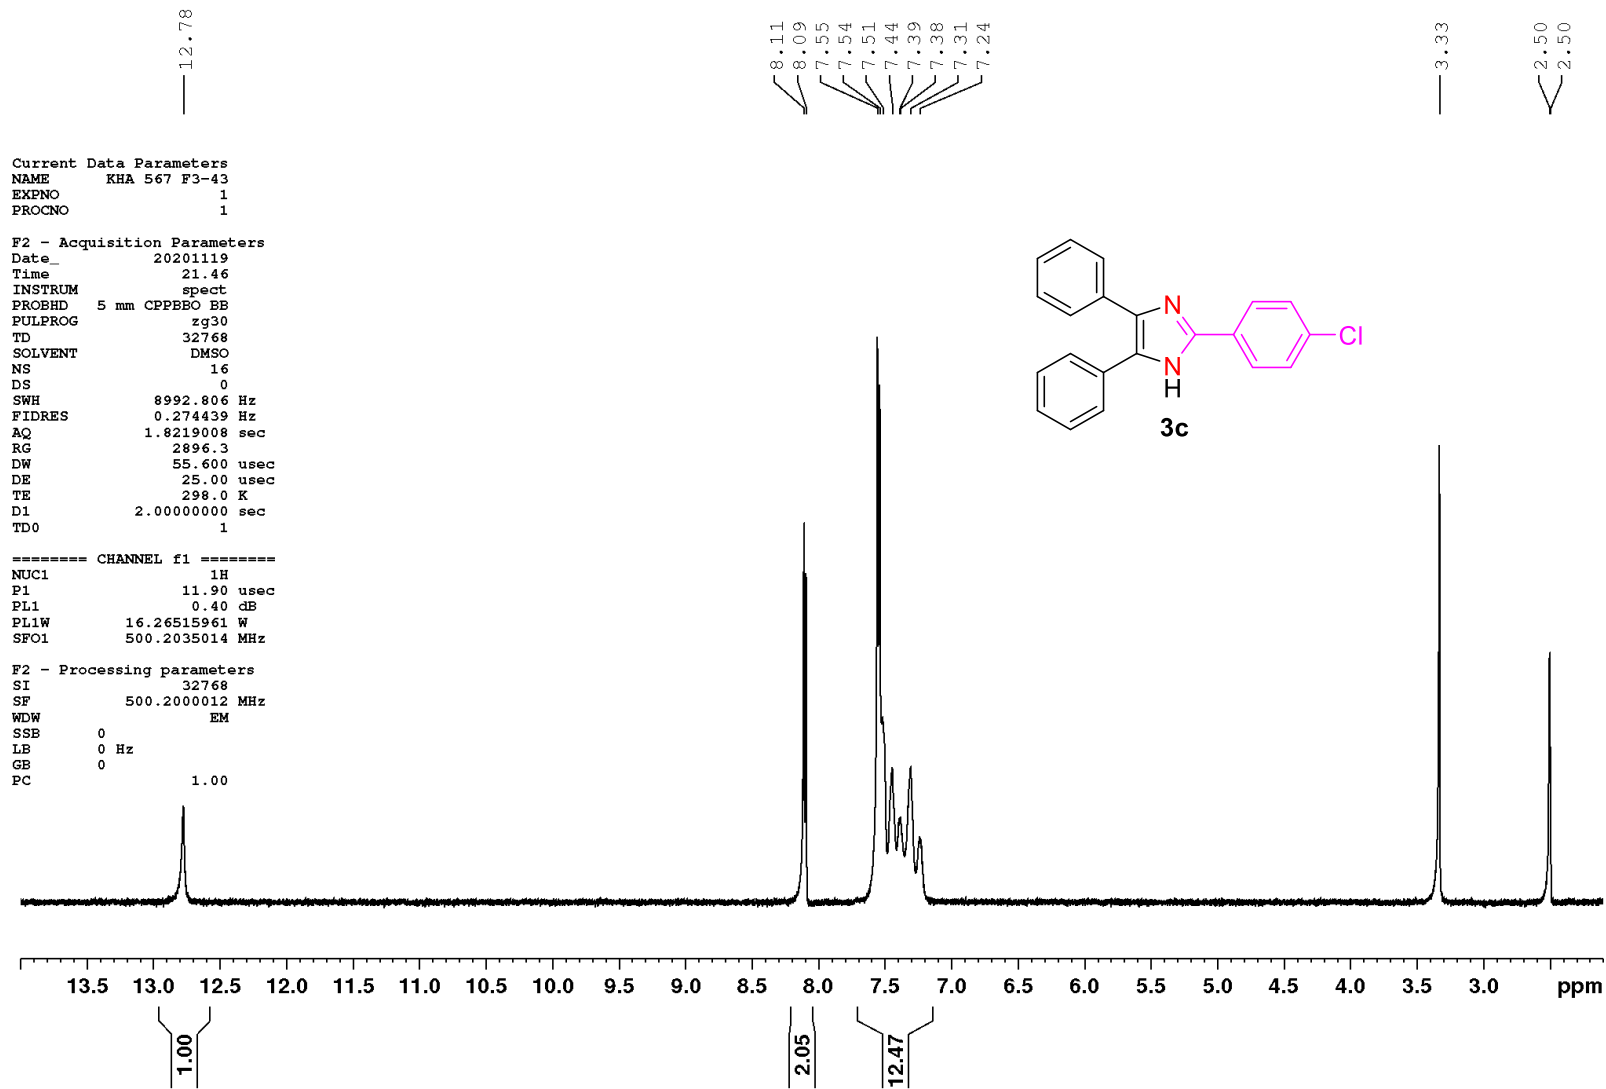

Figure S10. <sup>1</sup>H NMR spectrum of compound **3c** (500 MHz, DMSO-d<sub>6</sub>, 25 °C)

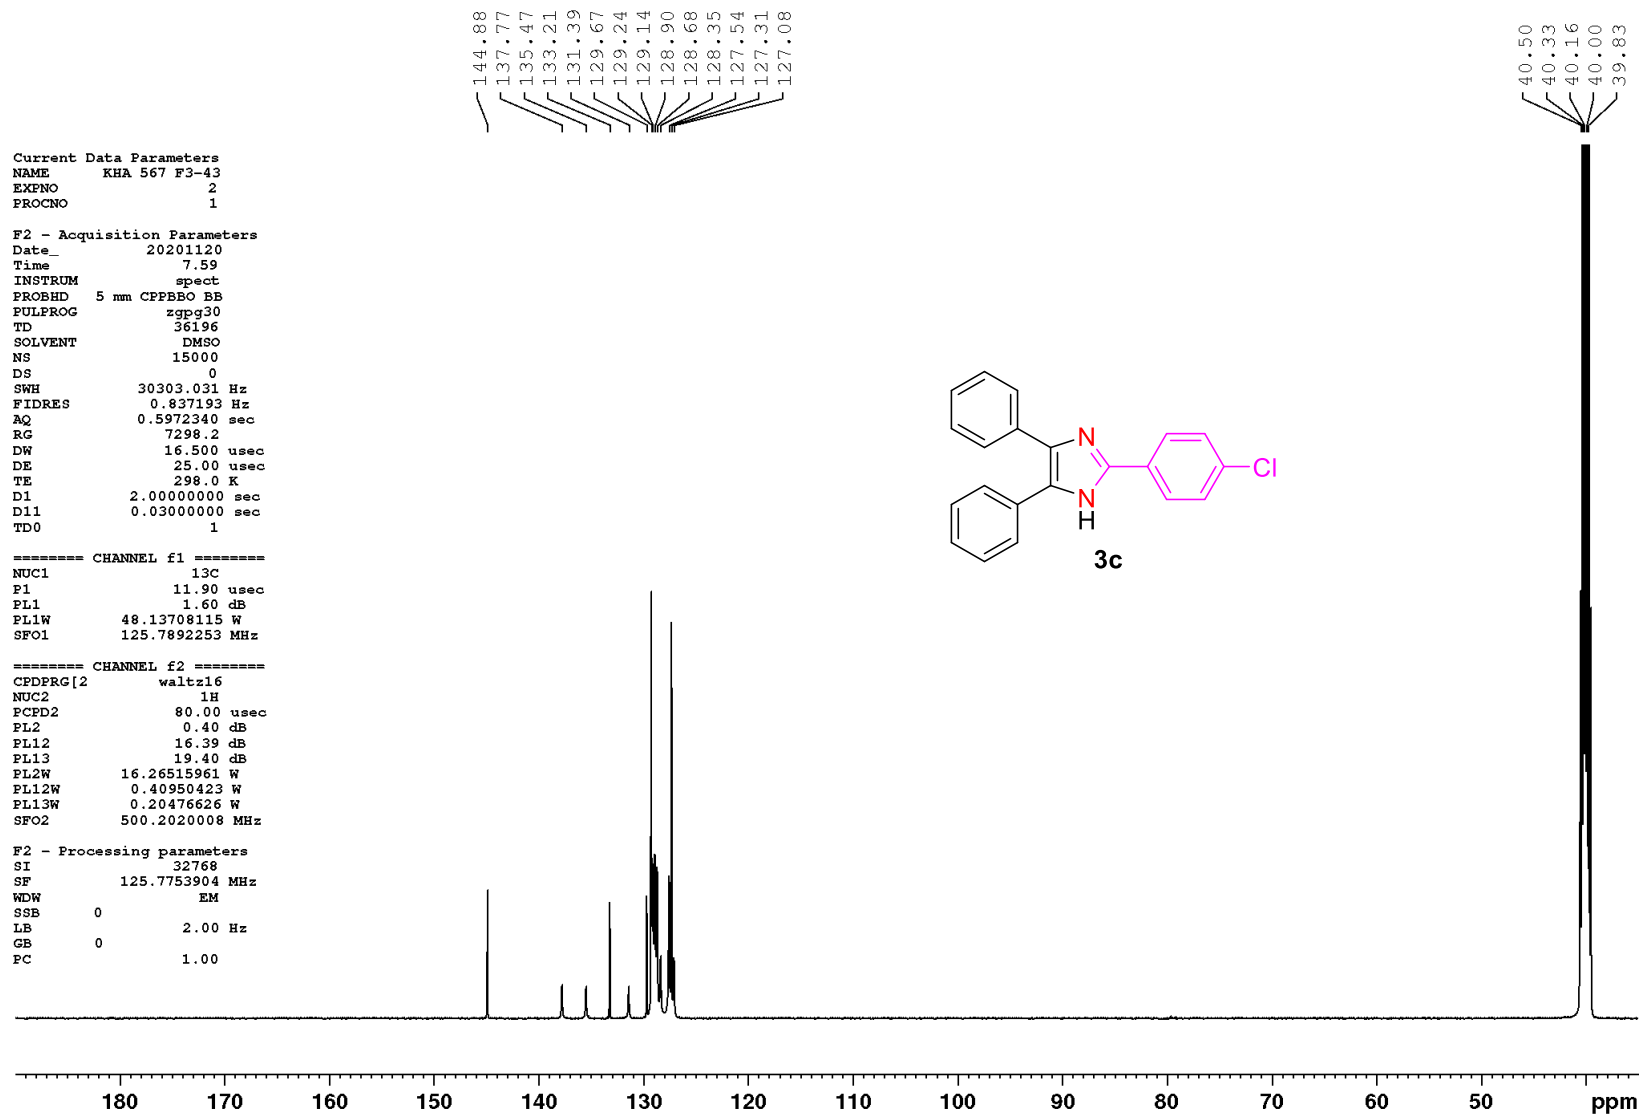

Figure S11.  $^{13}\text{C}$  NMR spectrum of compound **3c** (125 MHz, DMSO- $d_6$ , 25  $^\circ\text{C}$ )

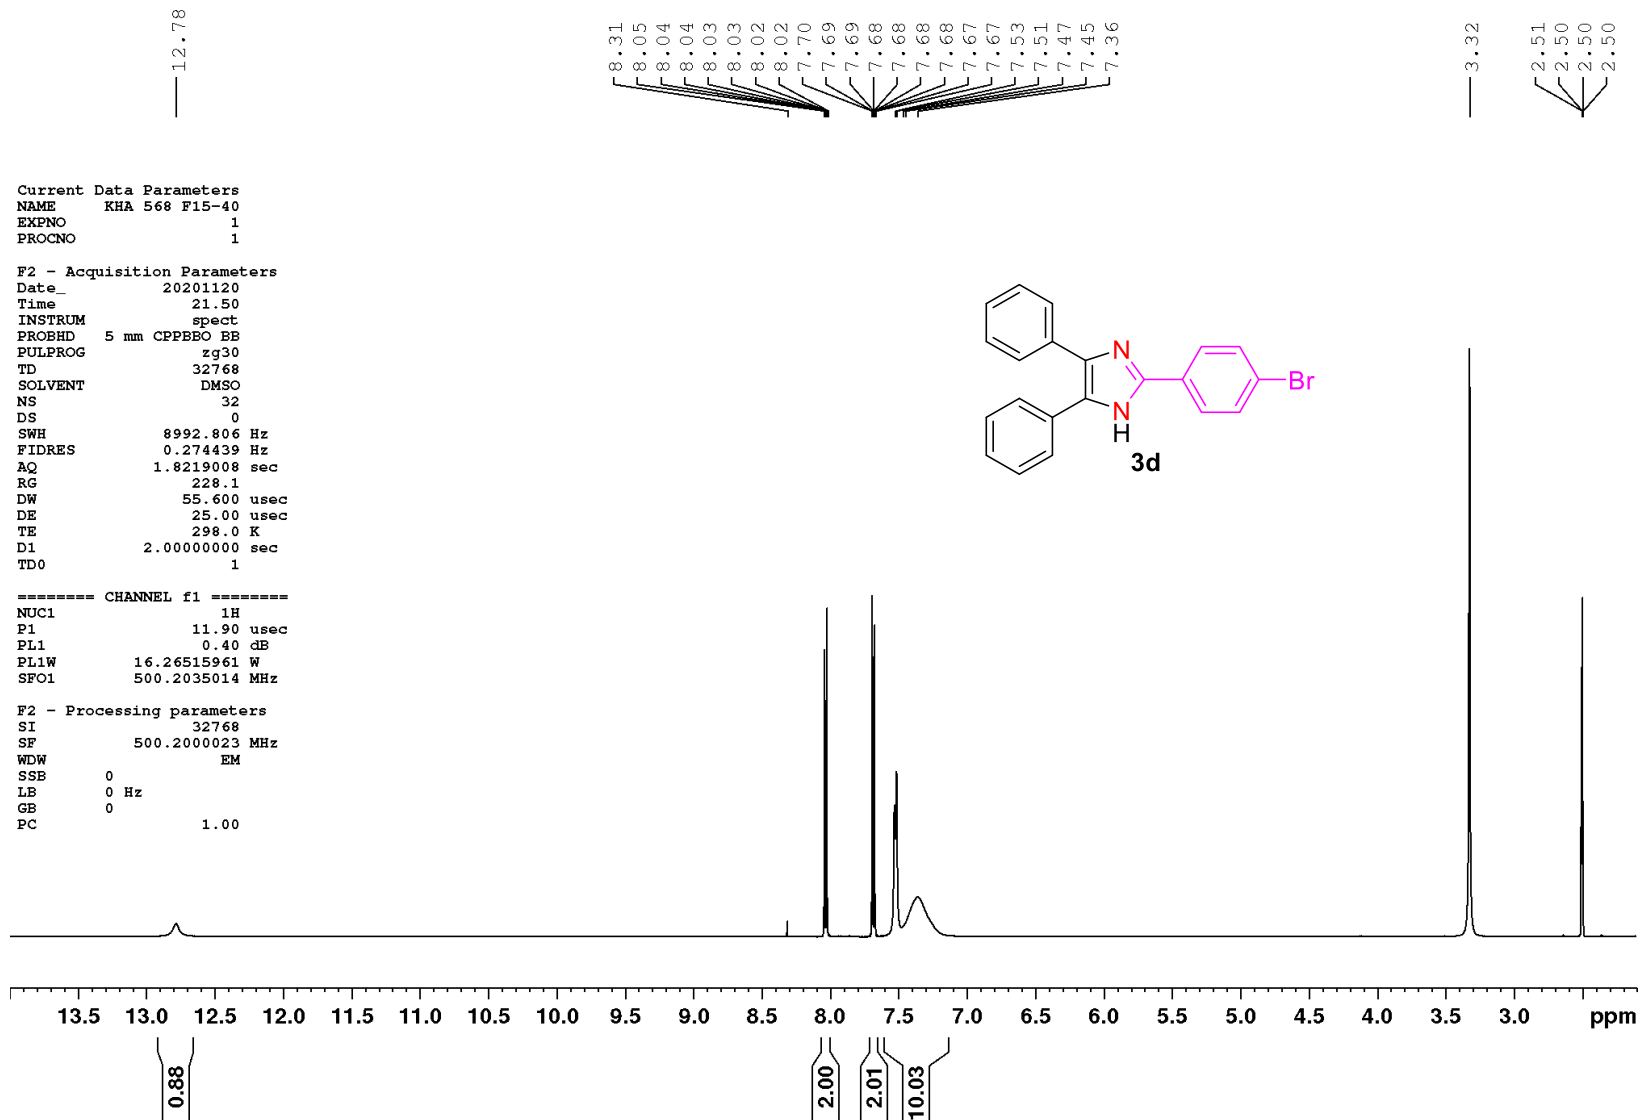

Figure S12. <sup>1</sup>H NMR spectrum of compound **3d** (500 MHz, DMSO-d<sub>6</sub>, 25 °C)

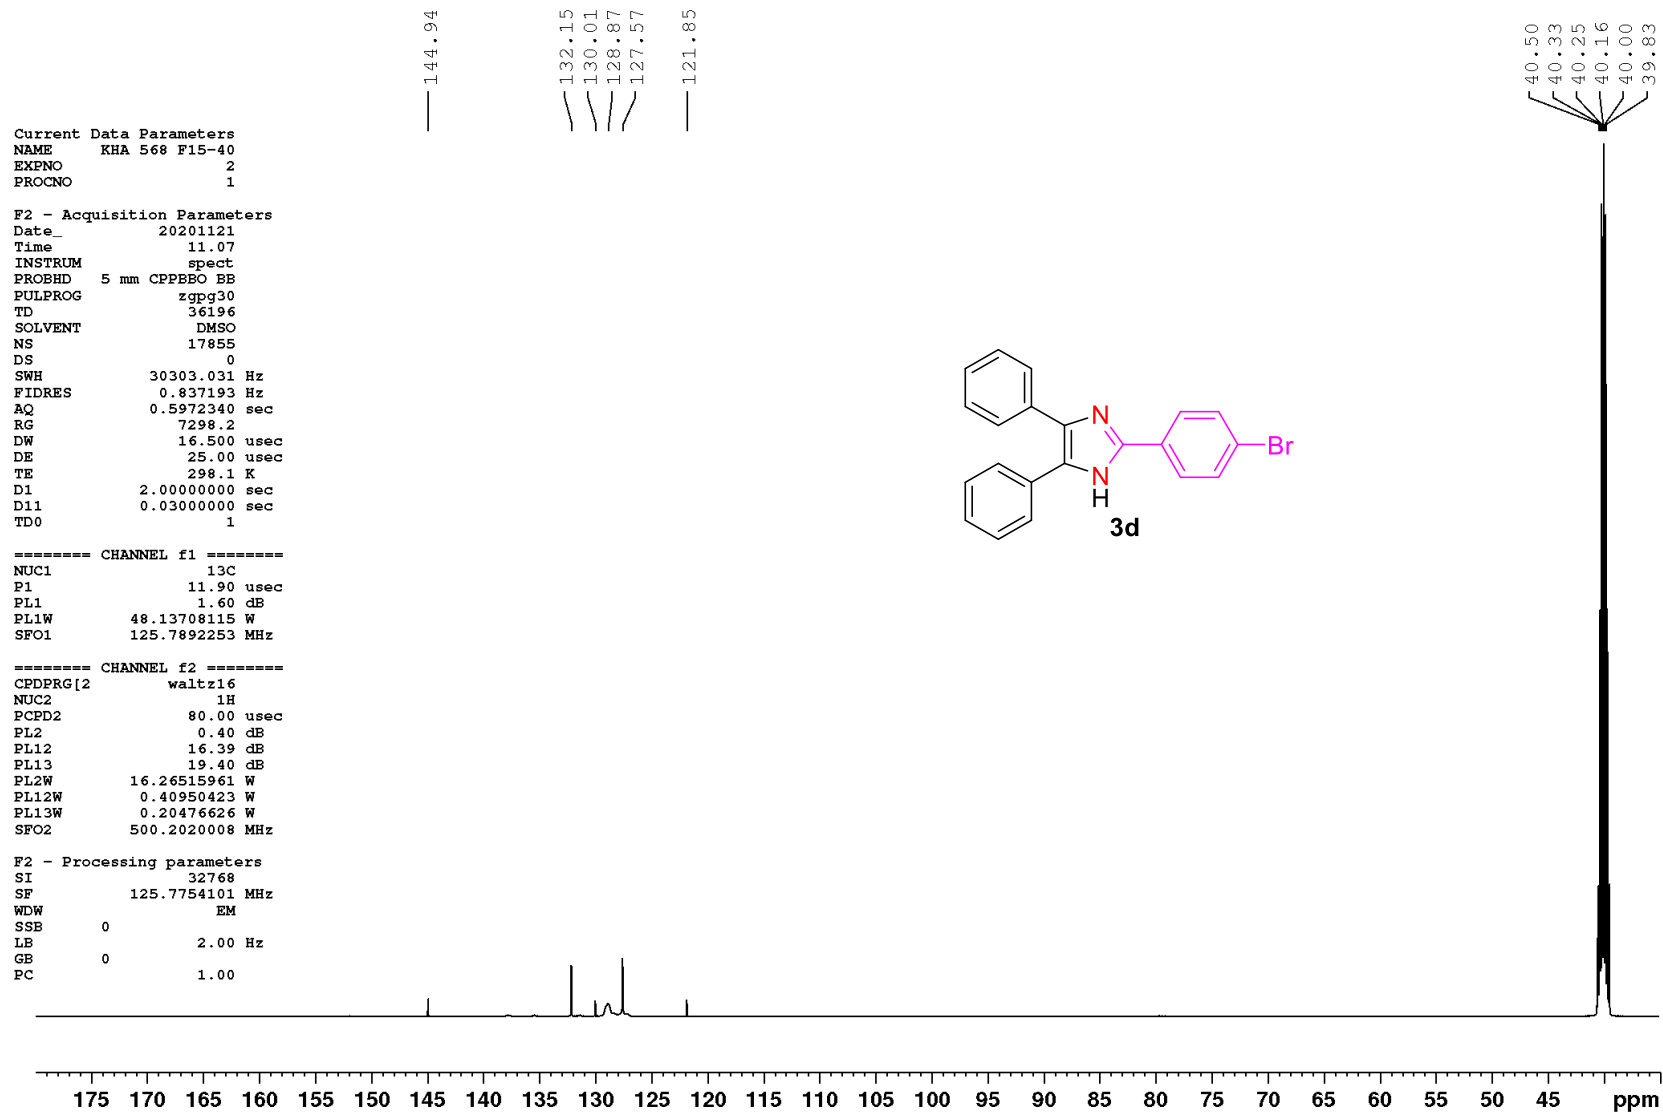

Figure S13.  $^{13}\text{C}$  NMR spectrum of compound **3d** (125 MHz, DMSO- $d_6$ , 25  $^{\circ}\text{C}$ )

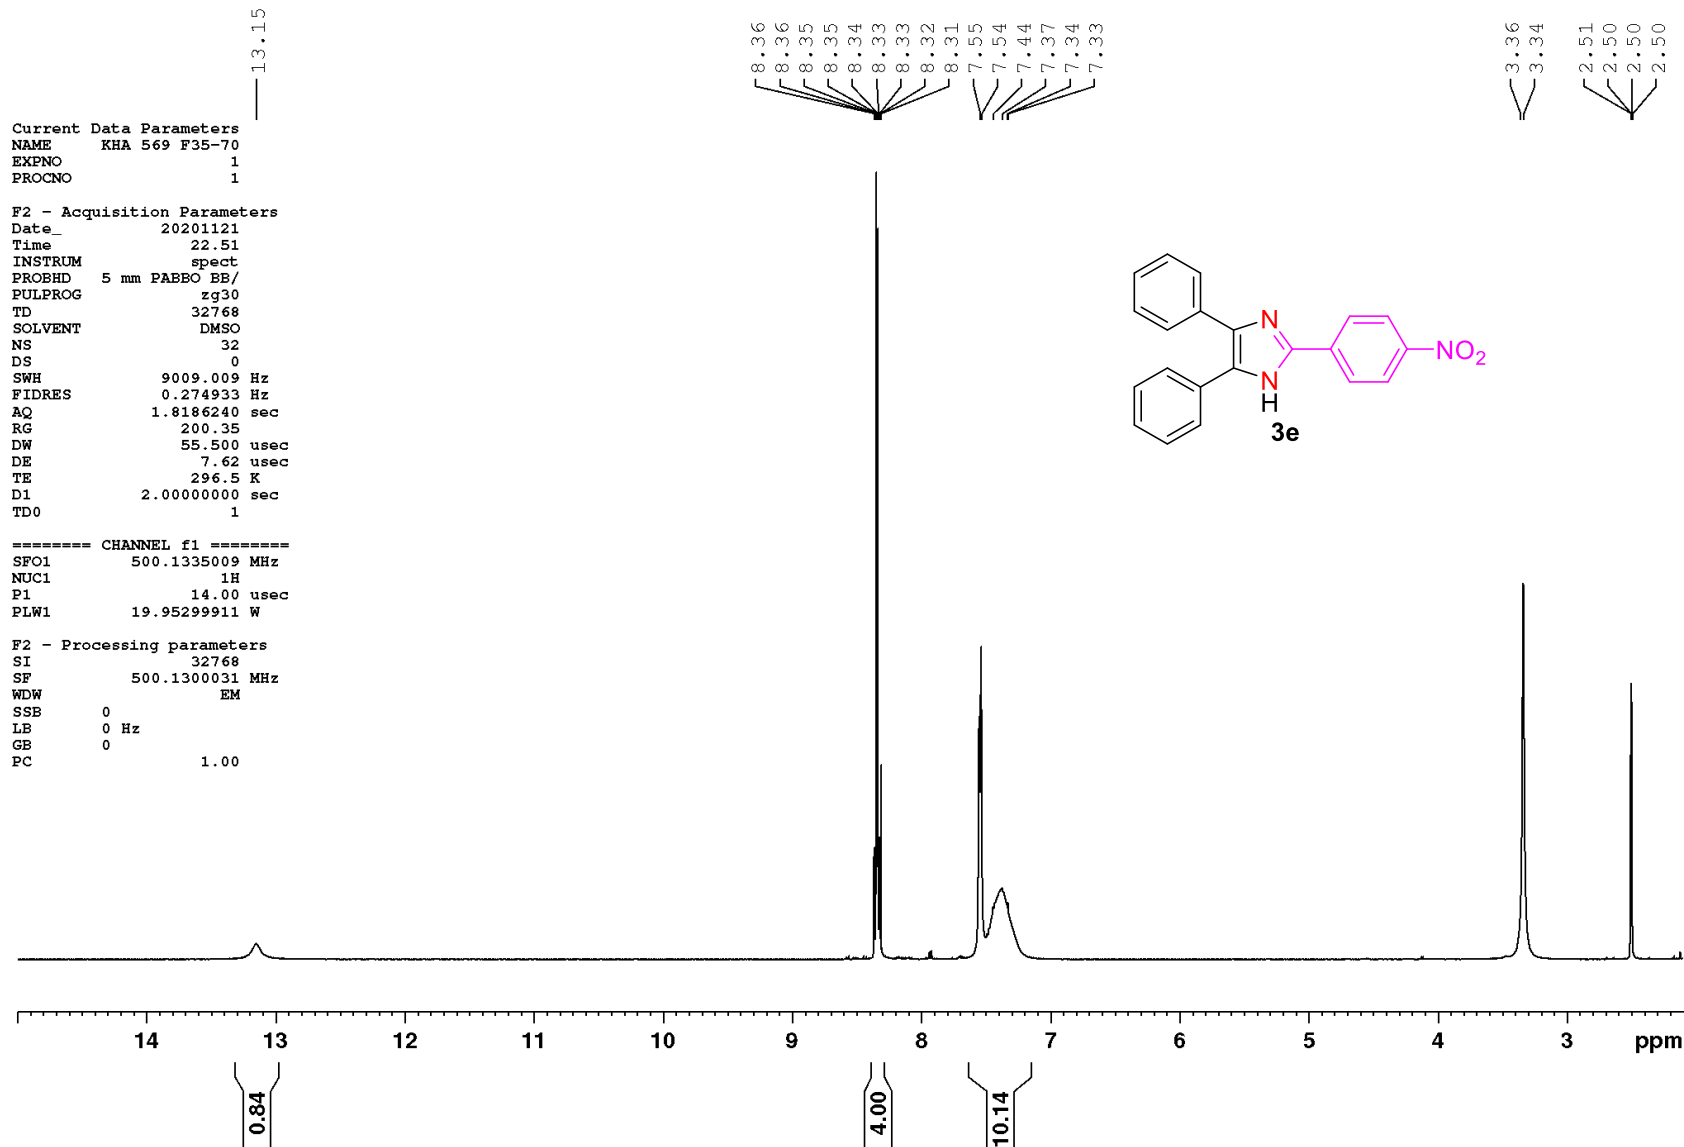

Figure S14. <sup>1</sup>H NMR spectrum of compound 3e (500 MHz, DMSO-d<sub>6</sub>, 25 °C)



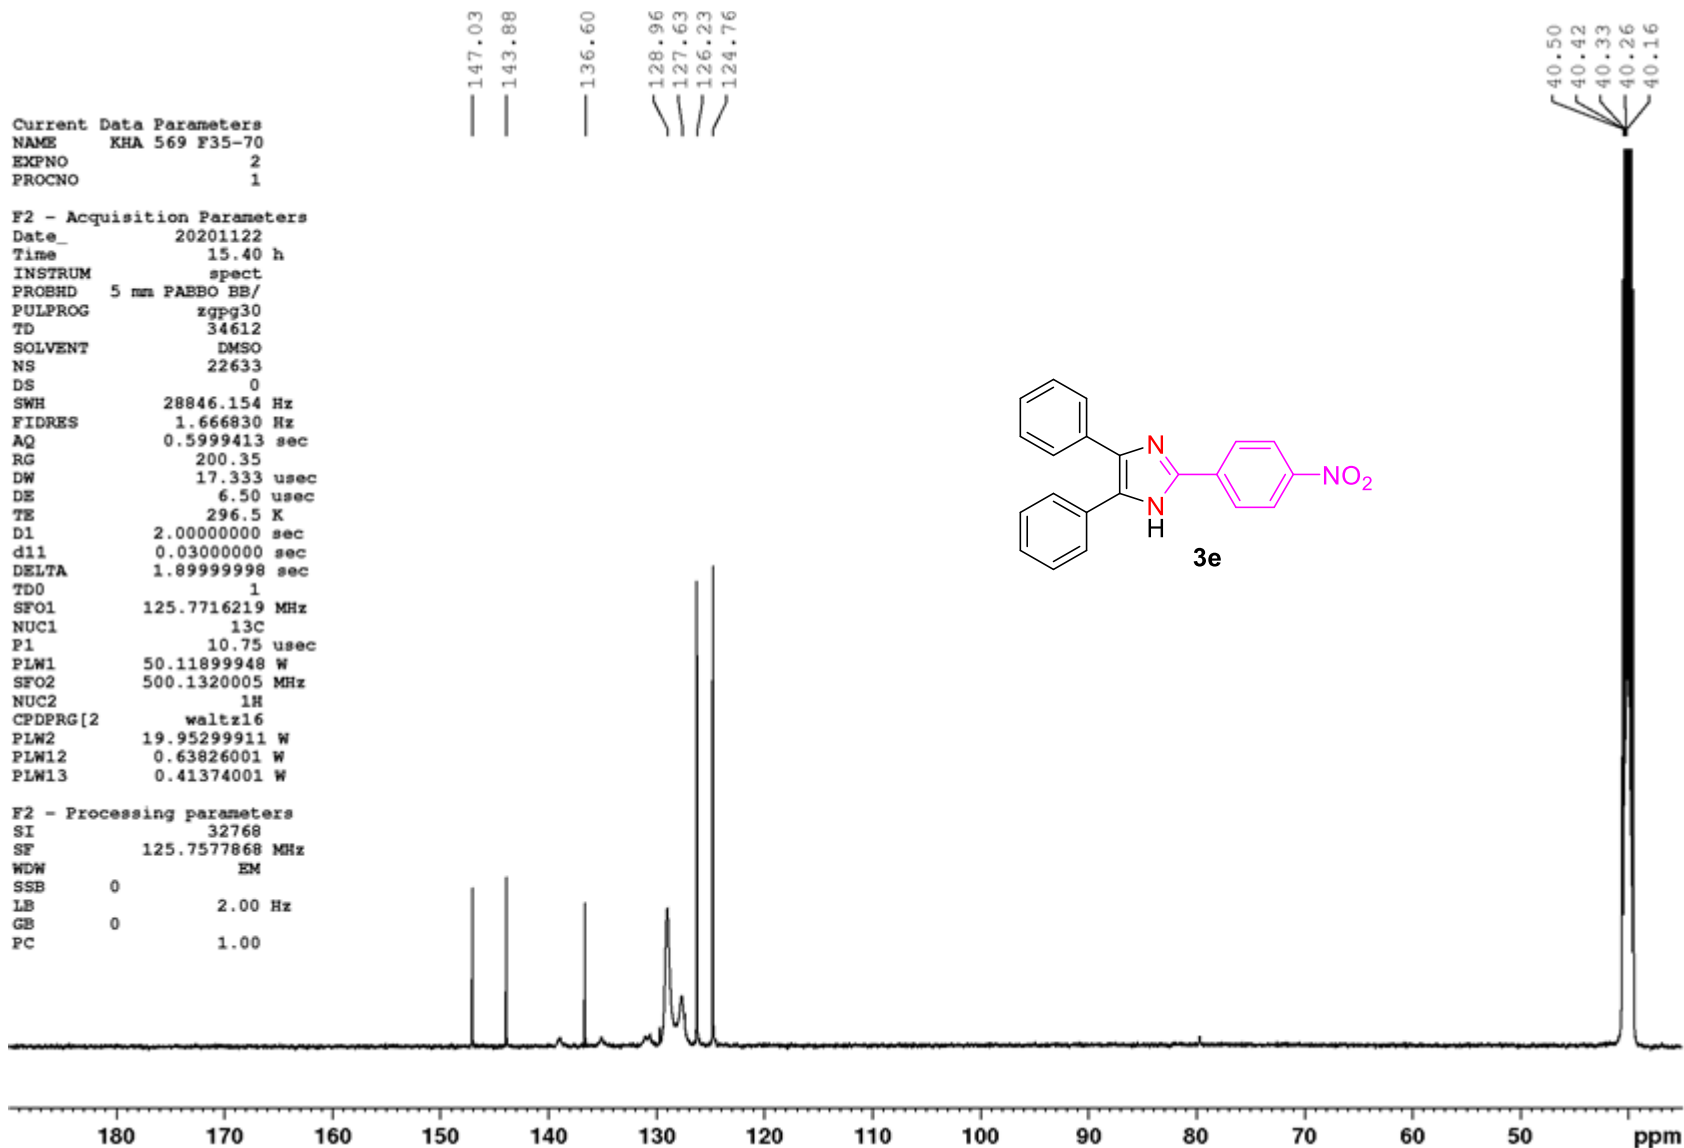

Figure S15.  $^{13}\text{C}$  NMR spectrum of compound **3e** (125 MHz, DMSO- $d_6$ , 25  $^{\circ}\text{C}$ )

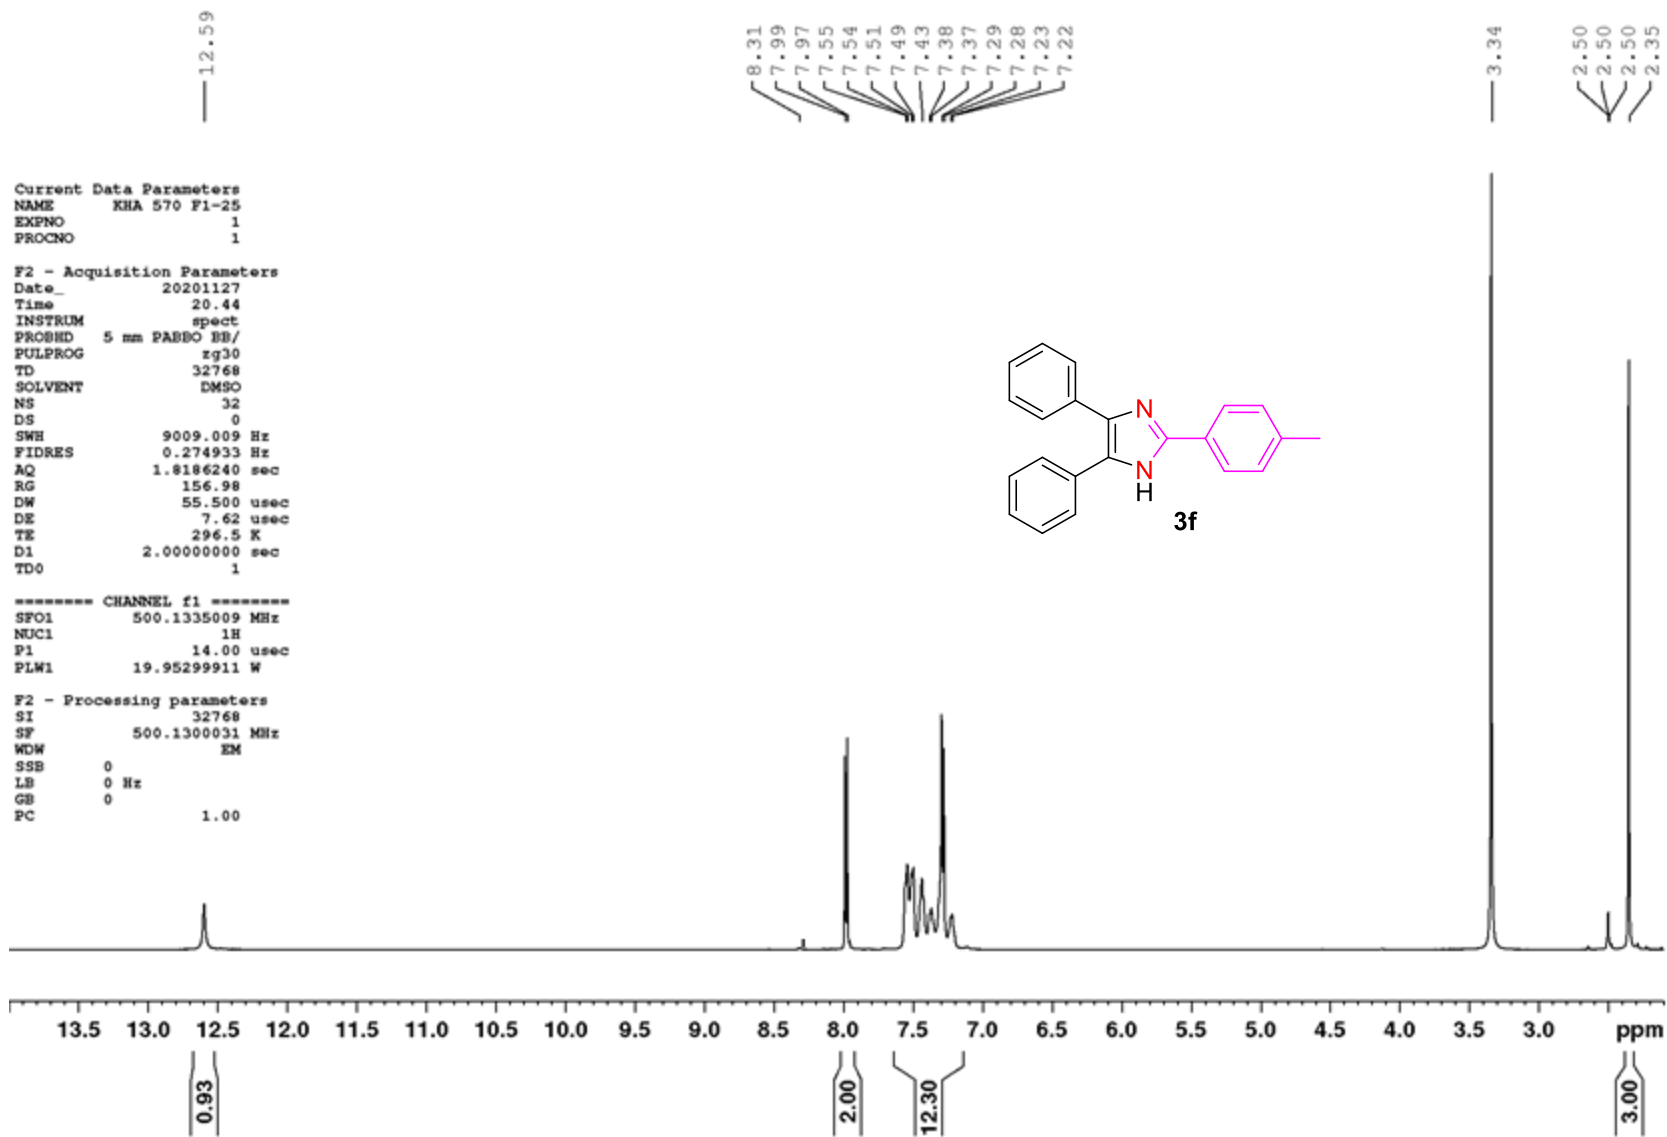

Figure S16. <sup>1</sup>H NMR spectrum of compound **3f** (500 MHz, DMSO-d<sub>6</sub>, 25 °C)

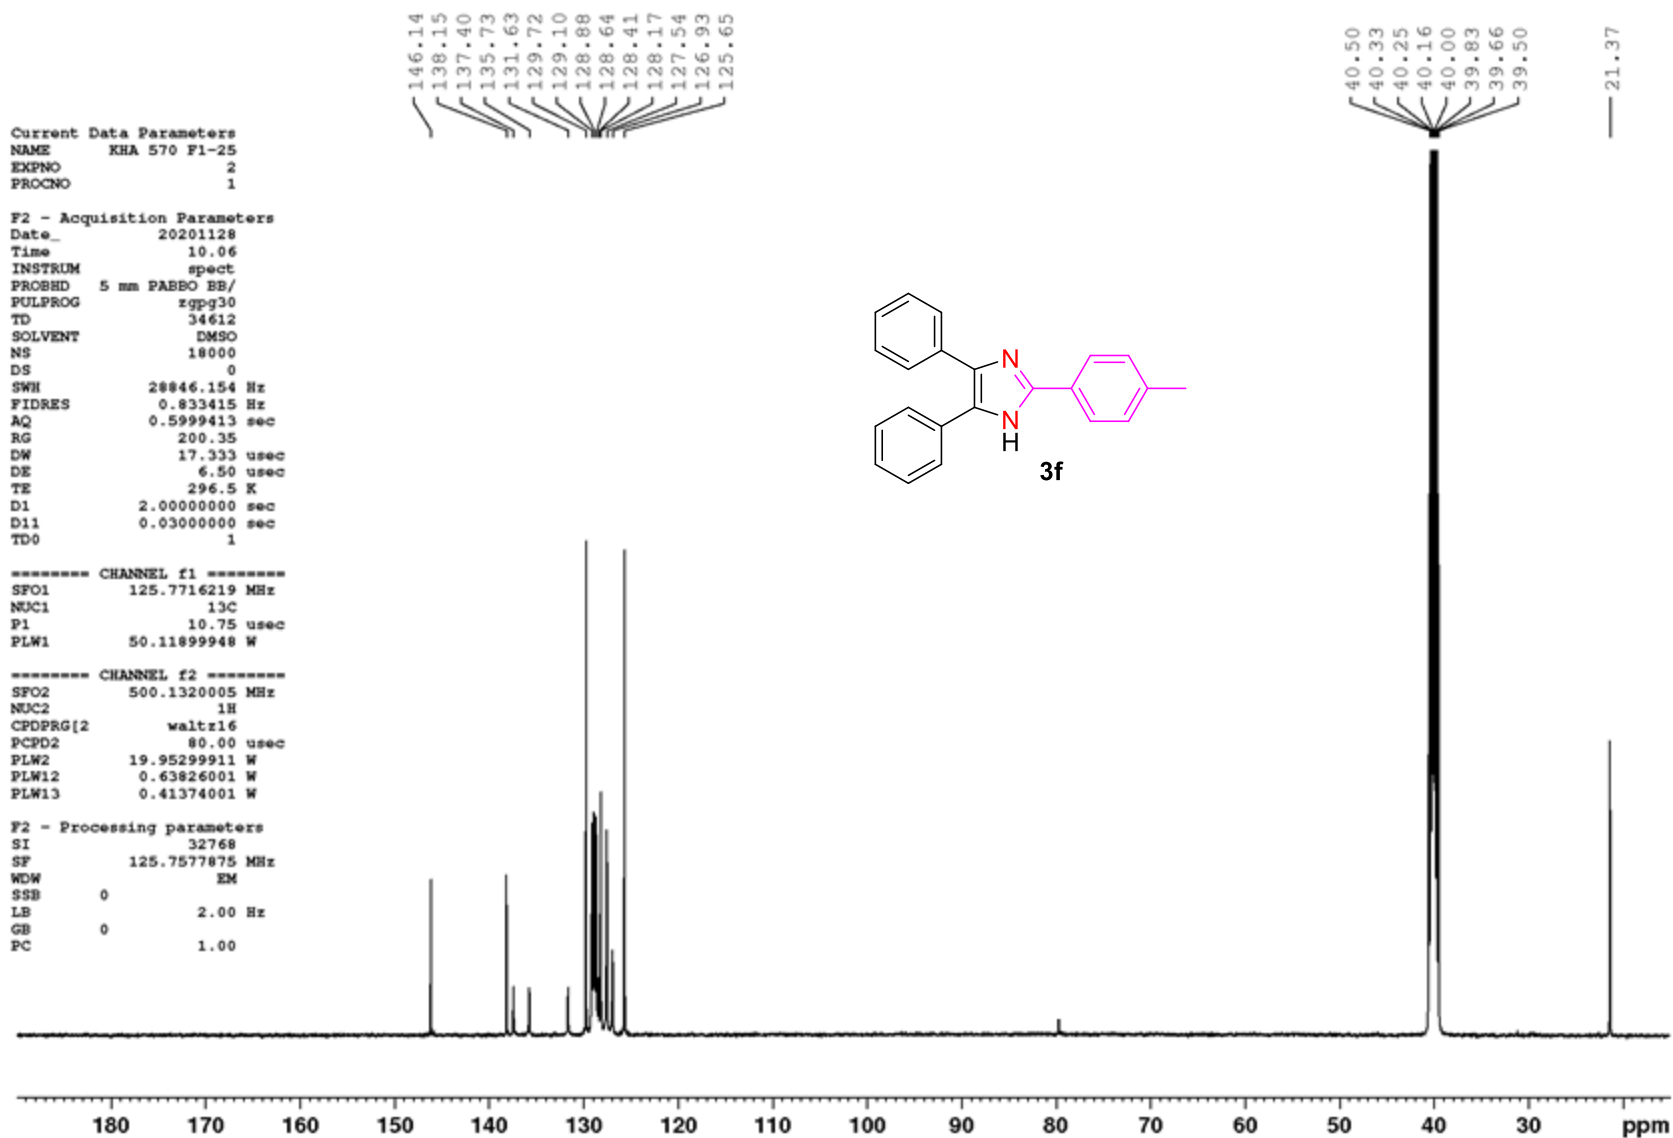

Figure S17. <sup>13</sup>C NMR spectrum of compound **3f** (125 MHz, DMSO-d<sub>6</sub>, 25 °C)  
 S-67

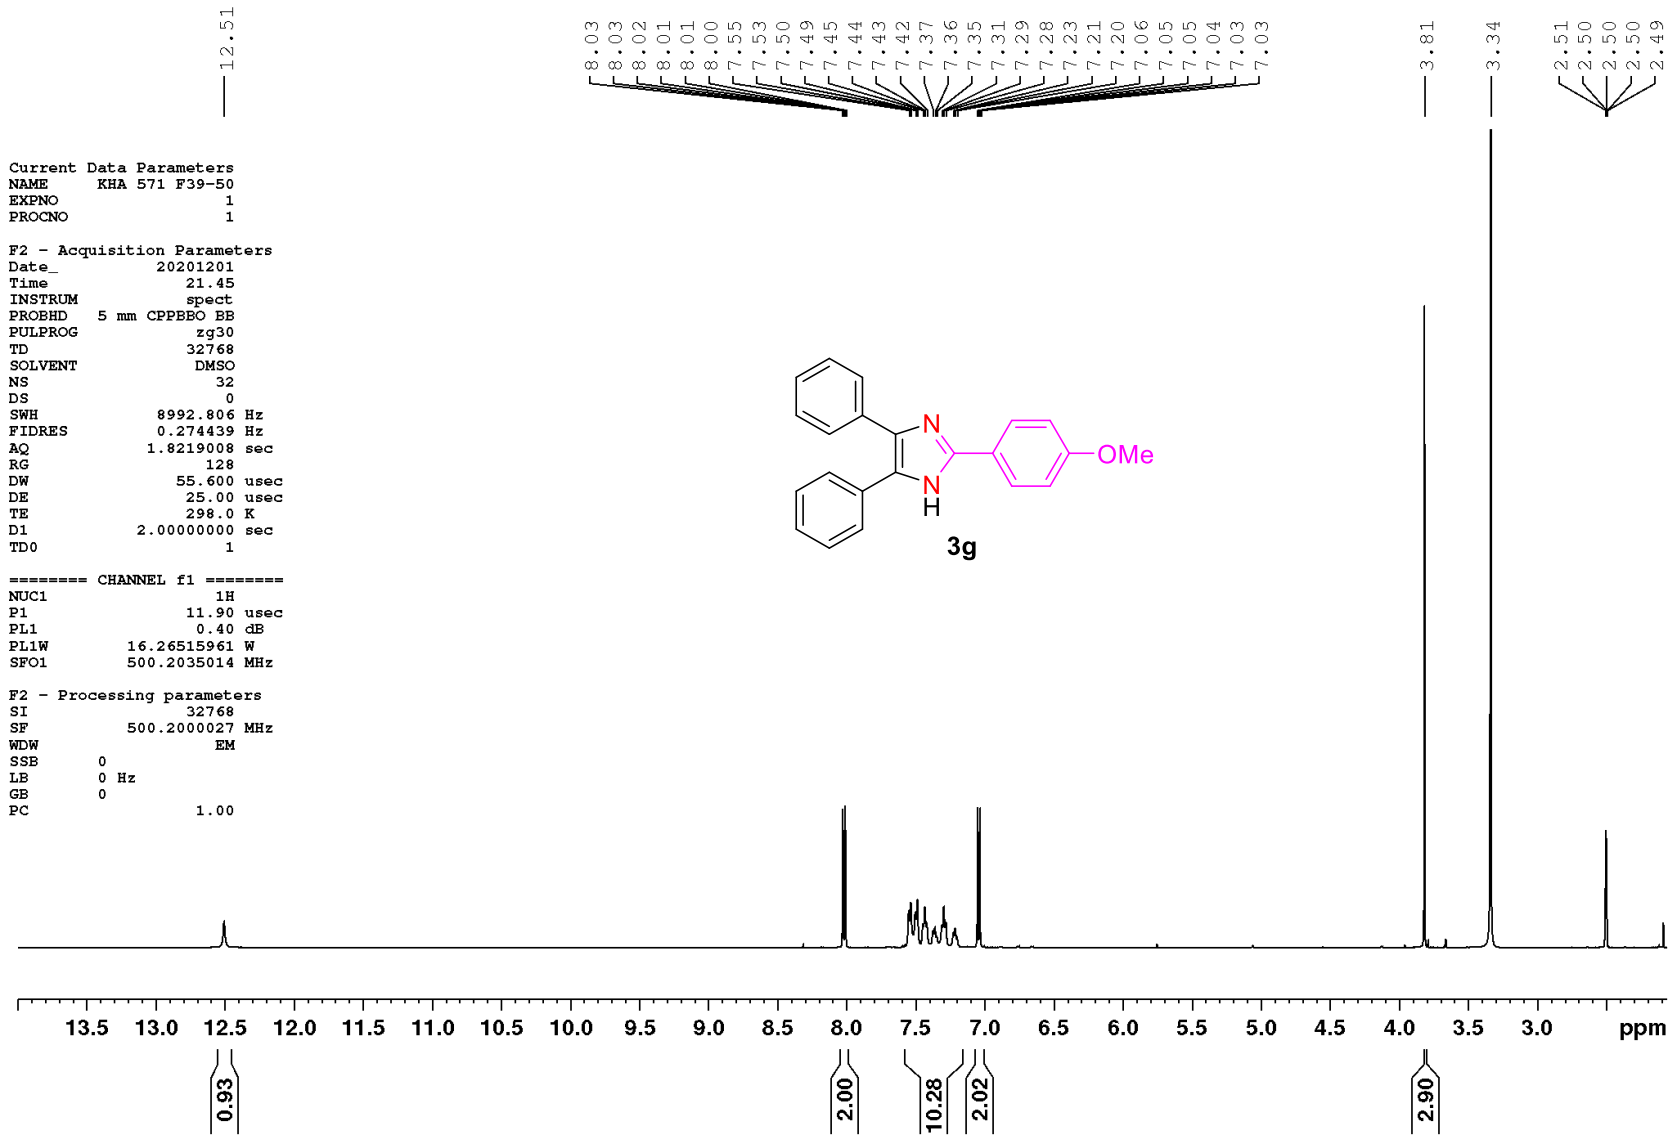

Figure S18. <sup>1</sup>H NMR spectrum of compound **3g** (500 MHz, DMSO-d<sub>6</sub>, 25 °C)

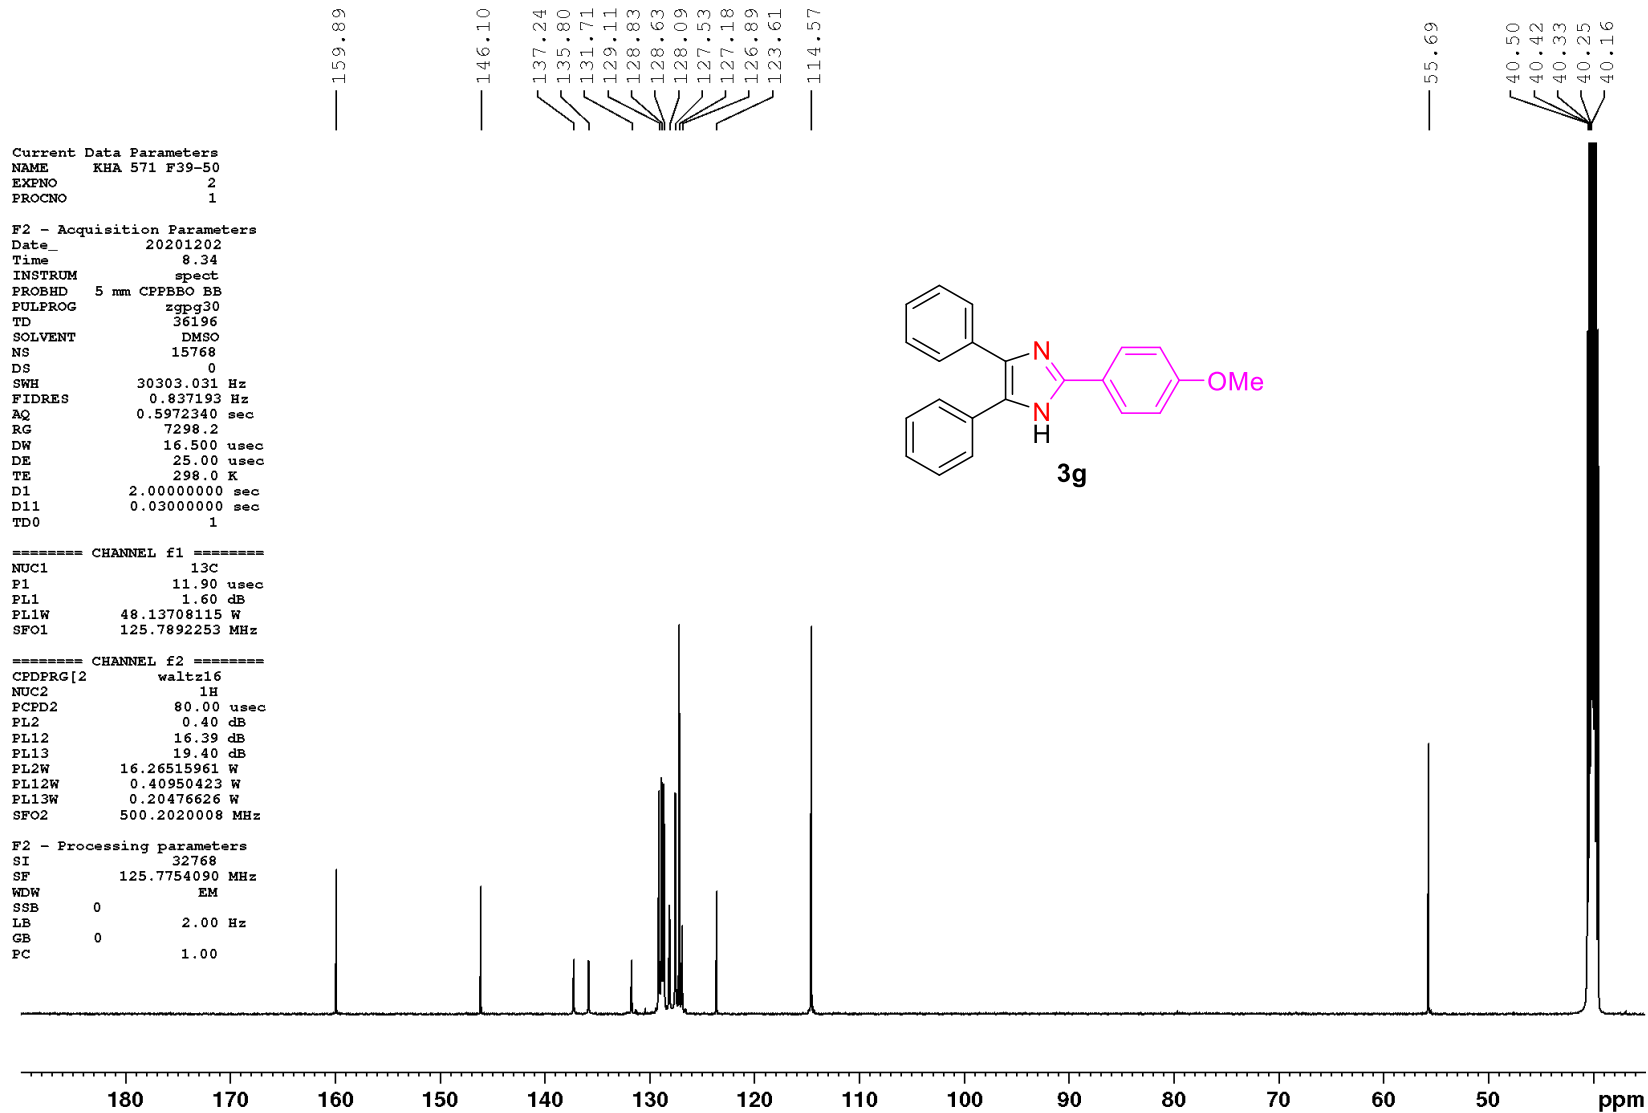

Figure S19.  $^{13}\text{C}$  NMR spectrum of compound **3g** (125 MHz, DMSO- $d_6$ , 25  $^{\circ}\text{C}$ )

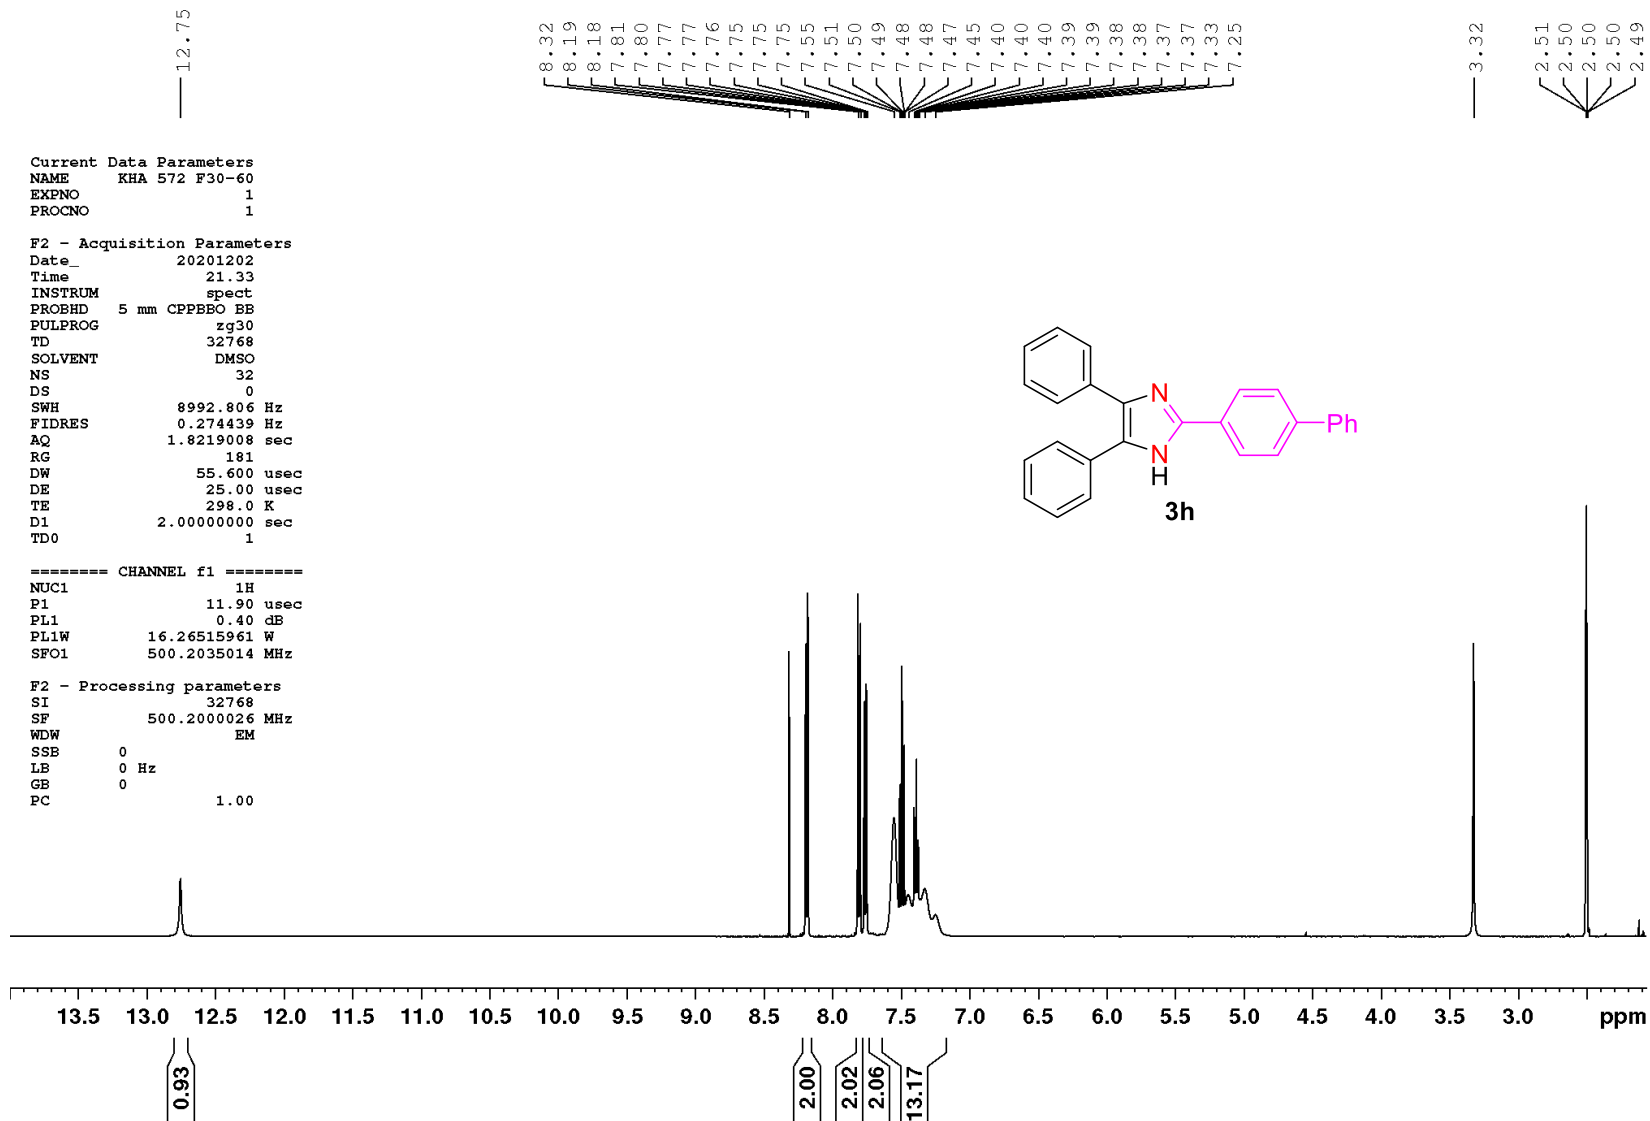

Figure S20. <sup>1</sup>H NMR spectrum of compound **3h** (500 MHz, DMSO-d<sub>6</sub>, 25 °C)

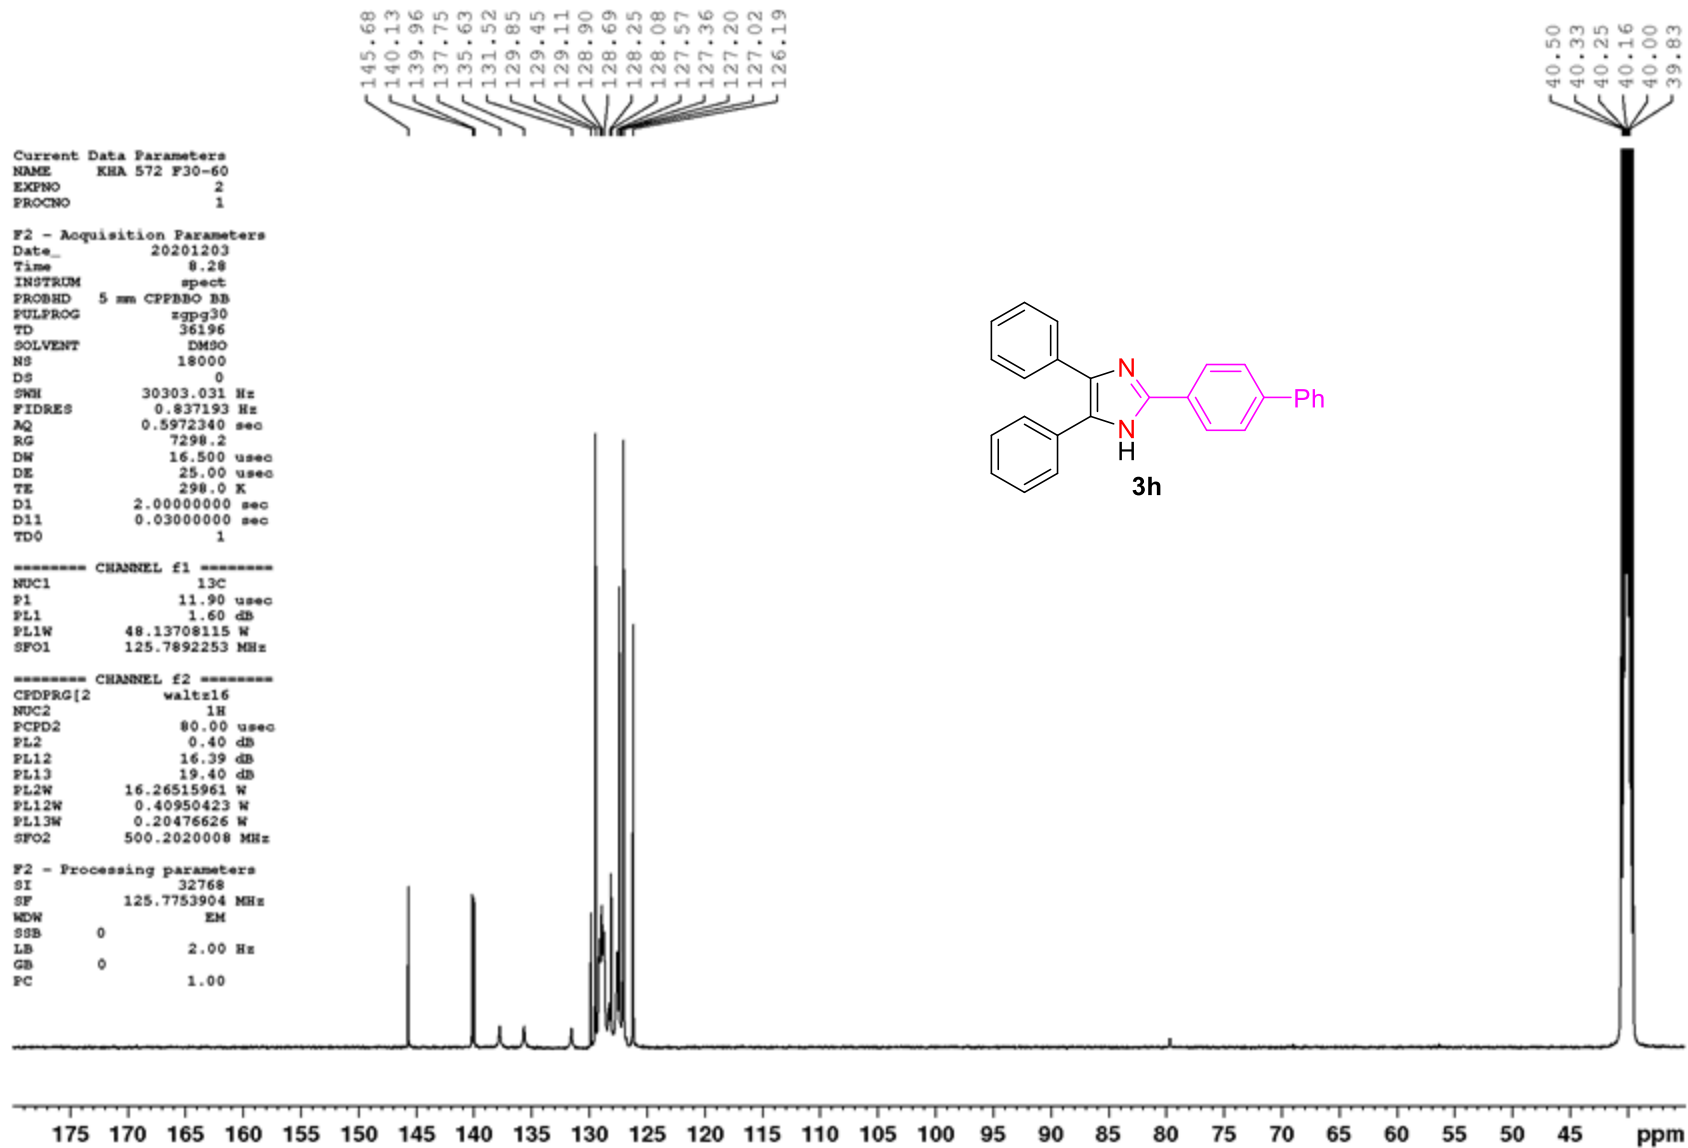

Figure S21.  $^{13}\text{C}$  NMR spectrum of compound **3h** (125 MHz, DMSO- $d_6$ , 25  $^{\circ}\text{C}$ )  
S-71

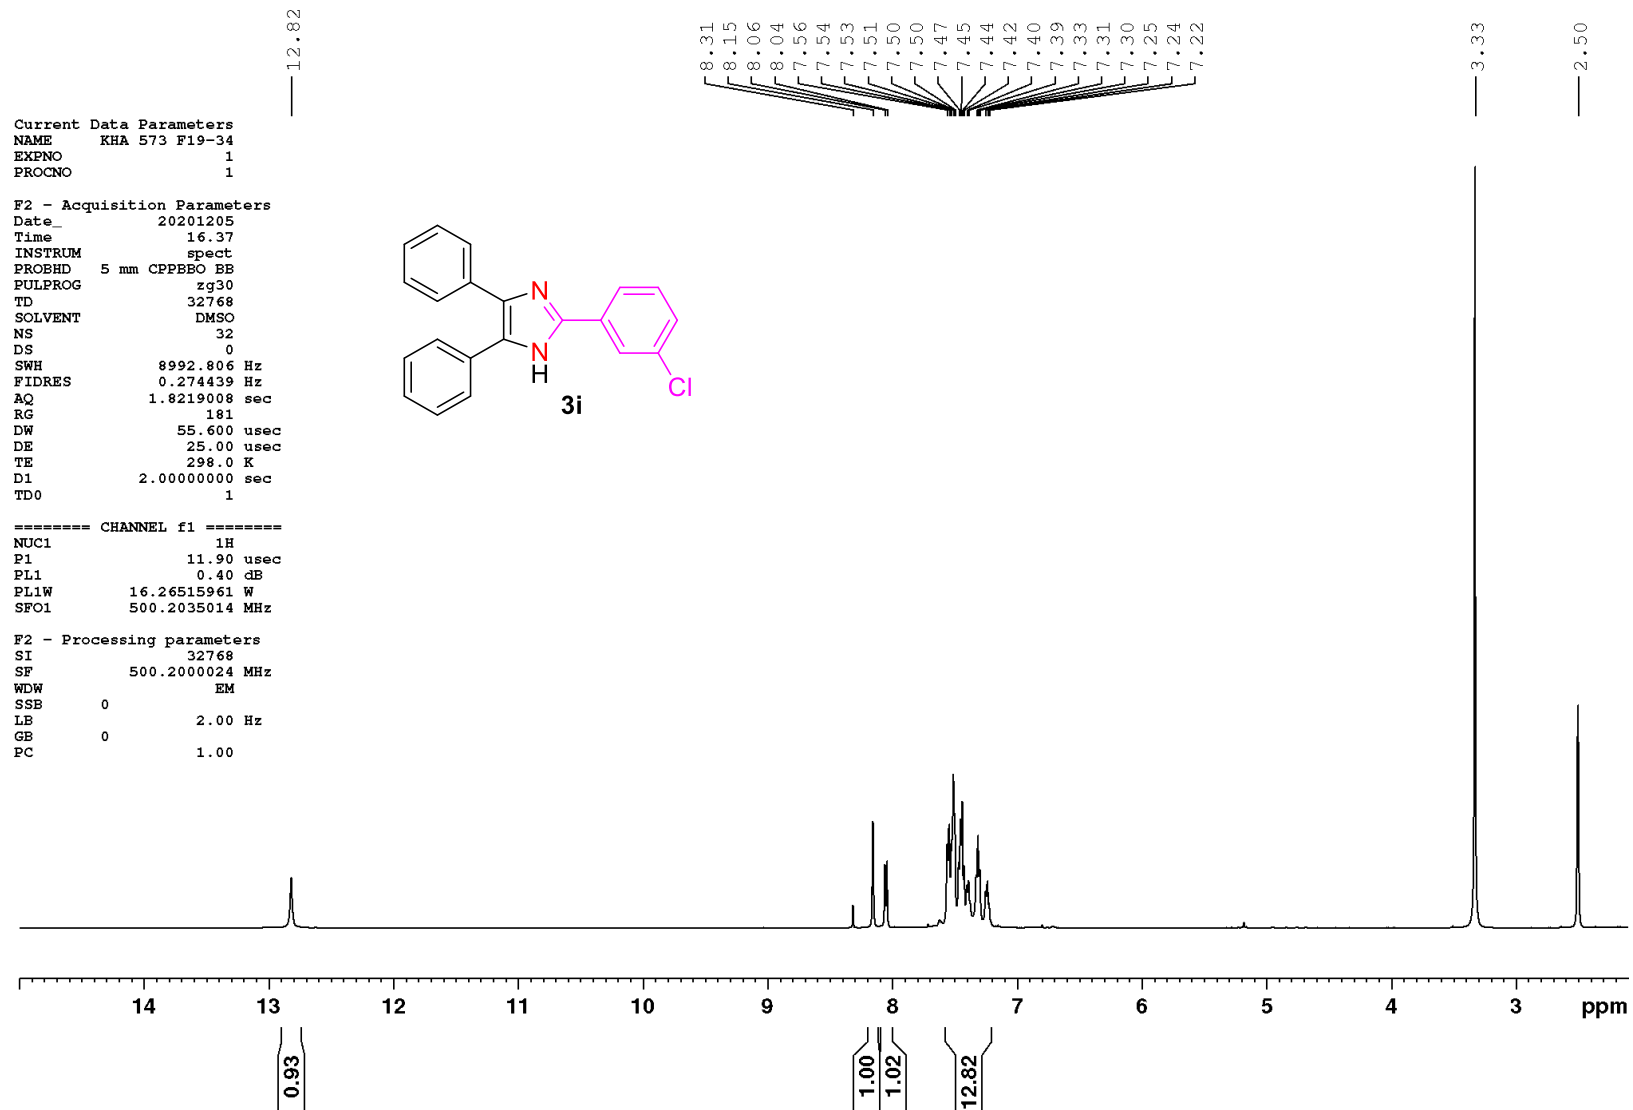

Figure S22. <sup>1</sup>H NMR spectrum of compound **3i** (500 MHz, DMSO-d<sub>6</sub>, 25 °C)



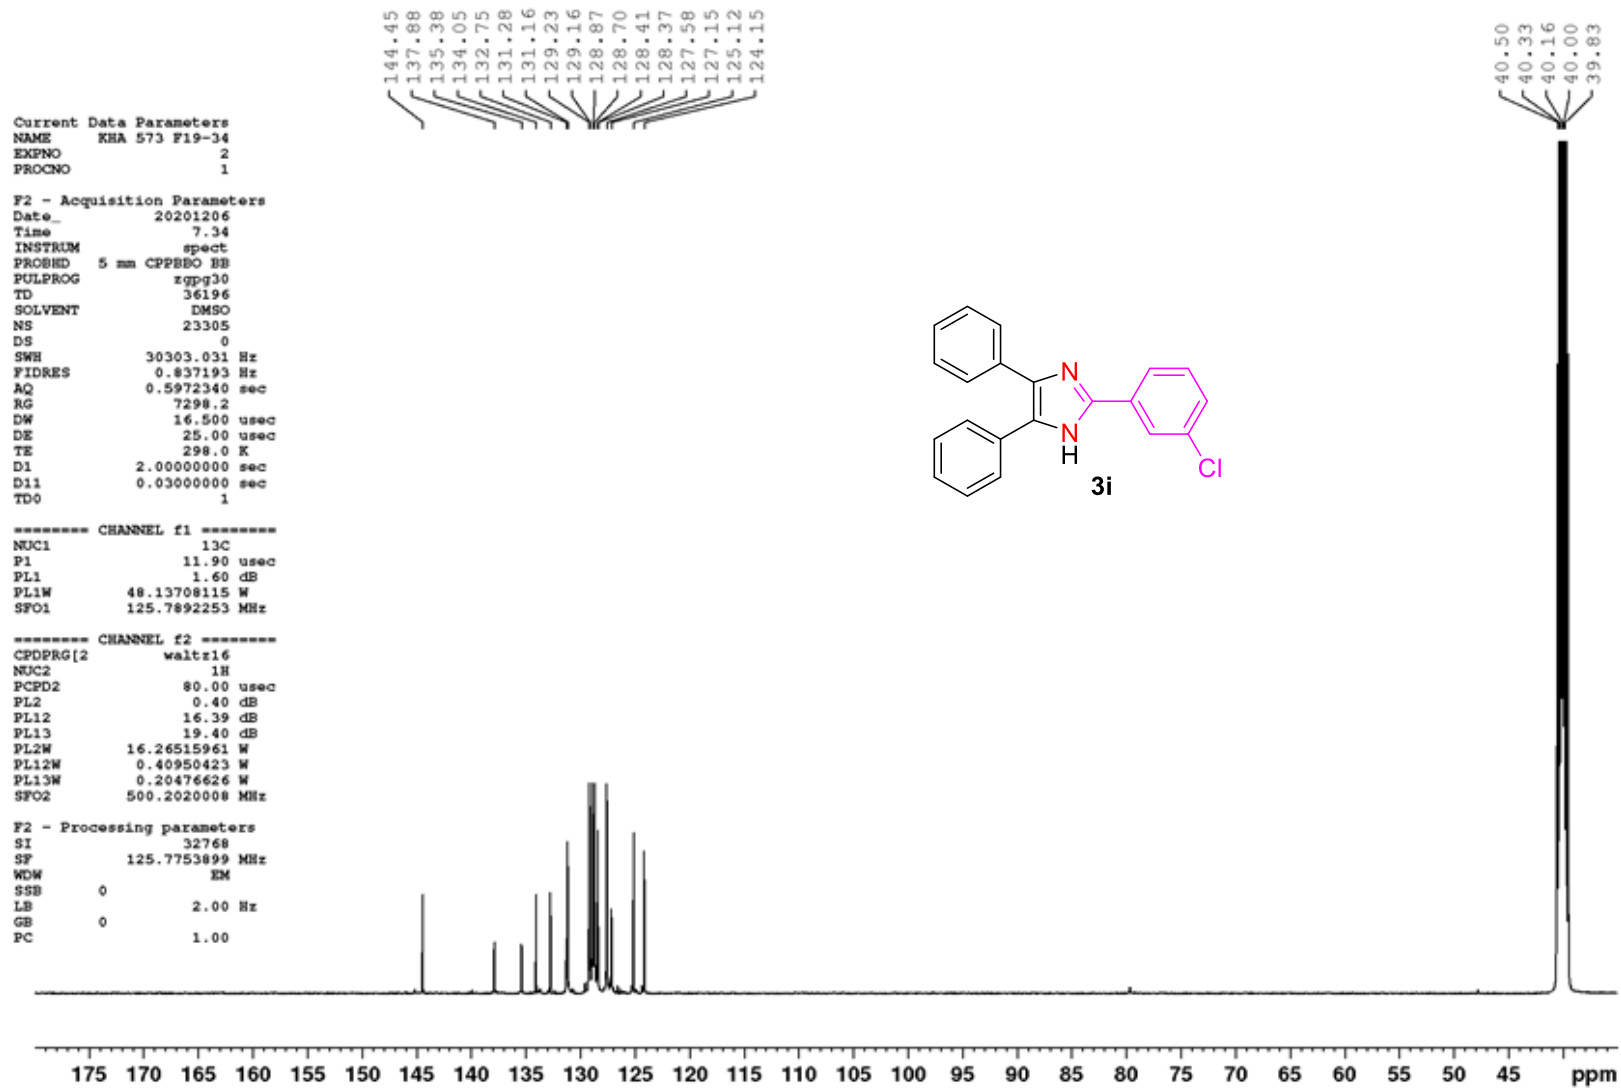

Figure S23.  $^{13}\text{C}$  NMR spectrum of compound **3i** (125 MHz, DMSO- $d_6$ , 25  $^{\circ}\text{C}$ )

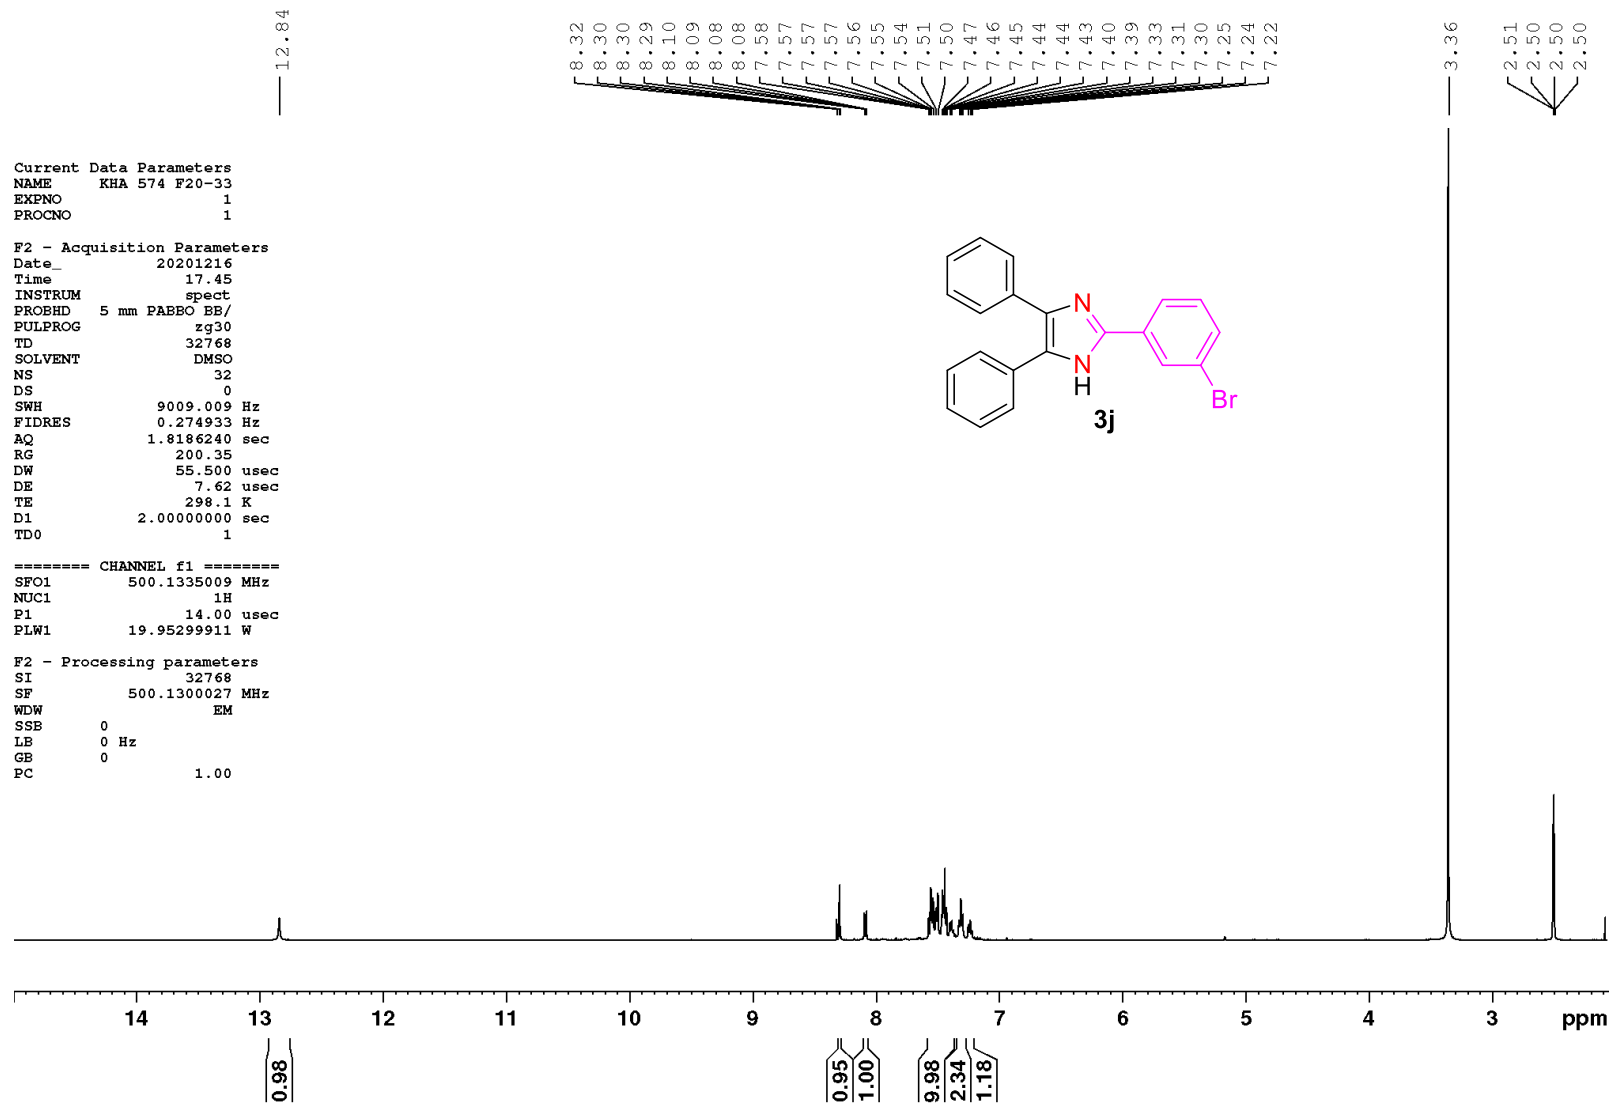

Figure S24.  $^1\text{H}$  NMR spectrum of compound **3j** (500 MHz, DMSO- $d_6$ , 25  $^\circ\text{C}$ )

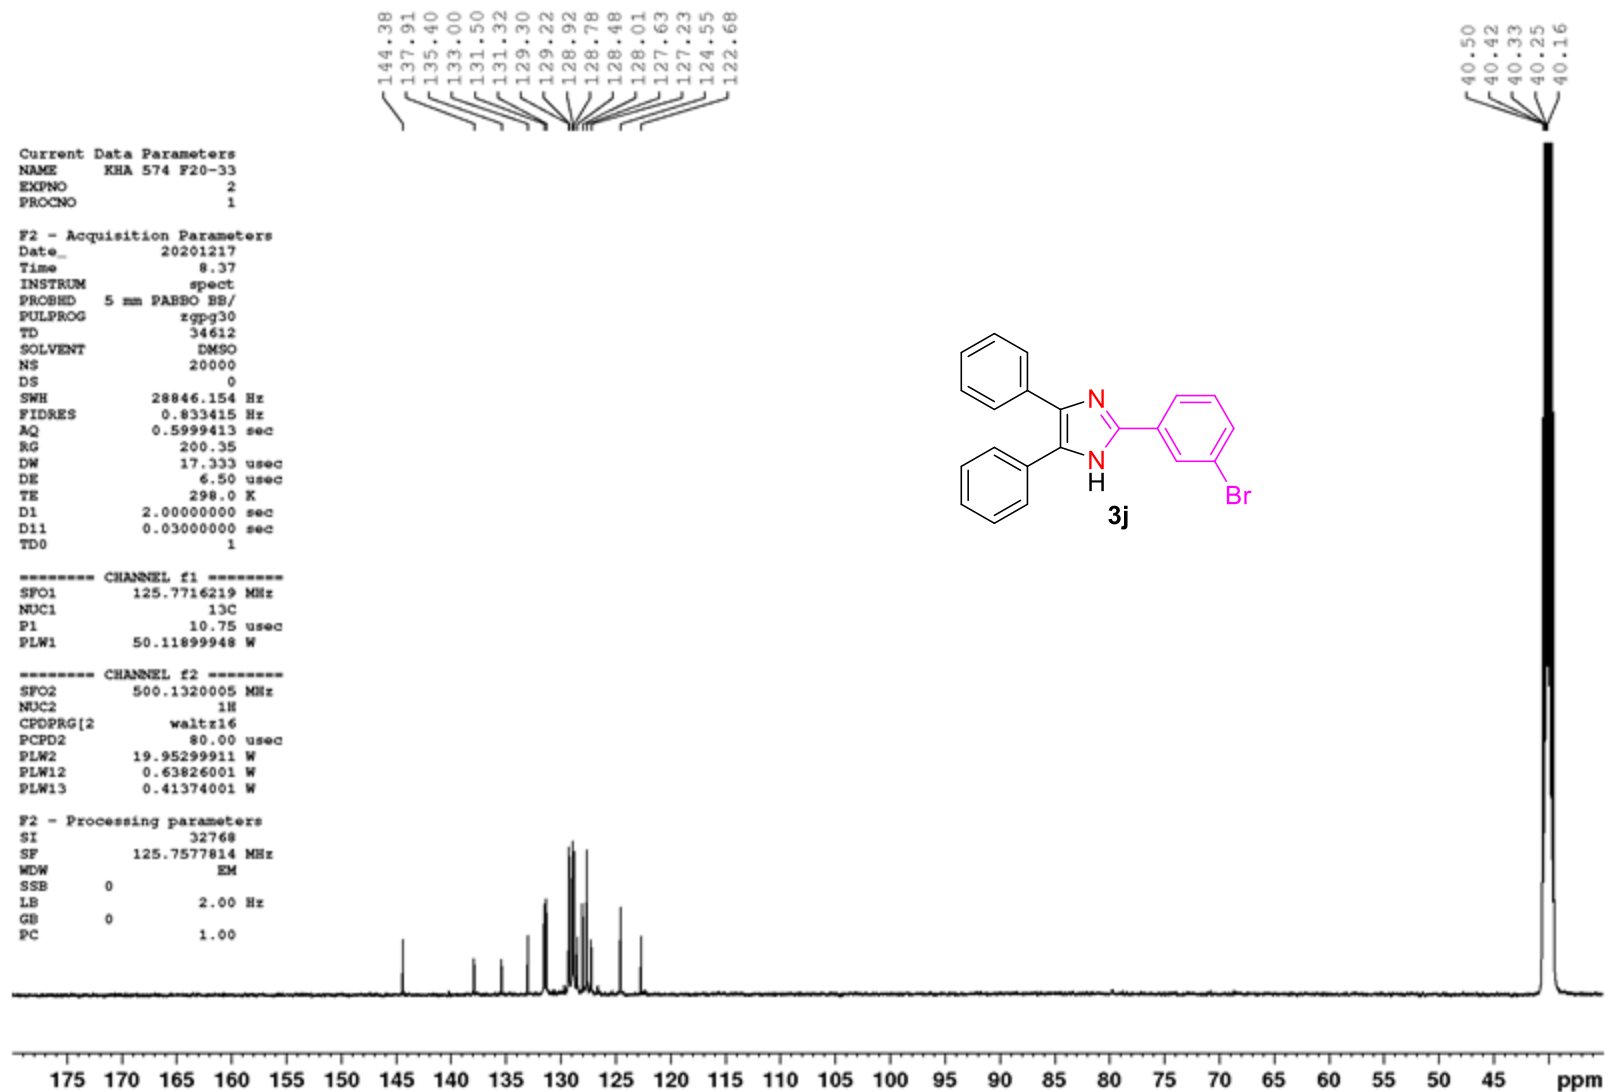

Figure S25.  $^{13}\text{C}$  NMR spectrum of compound **3j** (125 MHz, DMSO- $d_6$ , 25  $^{\circ}\text{C}$ )

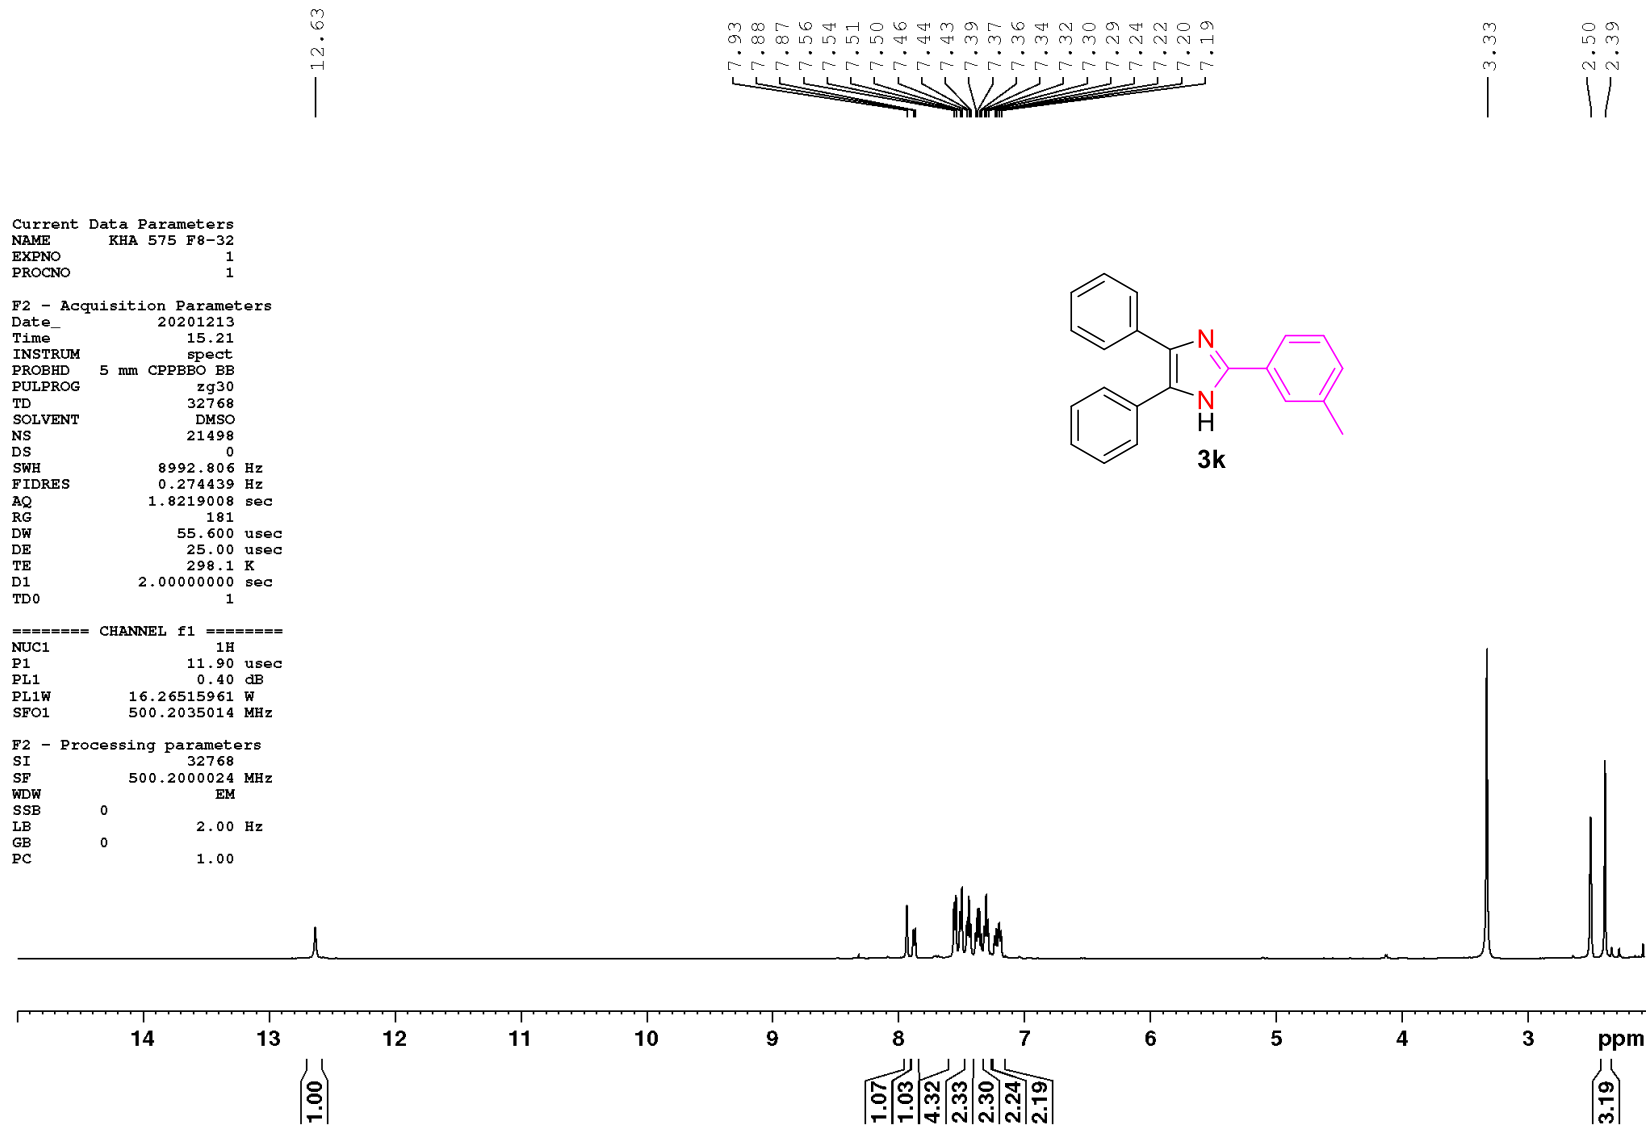

Figure S26. <sup>1</sup>H NMR spectrum of compound **3k** (500 MHz, DMSO-d<sub>6</sub>, 25 °C)

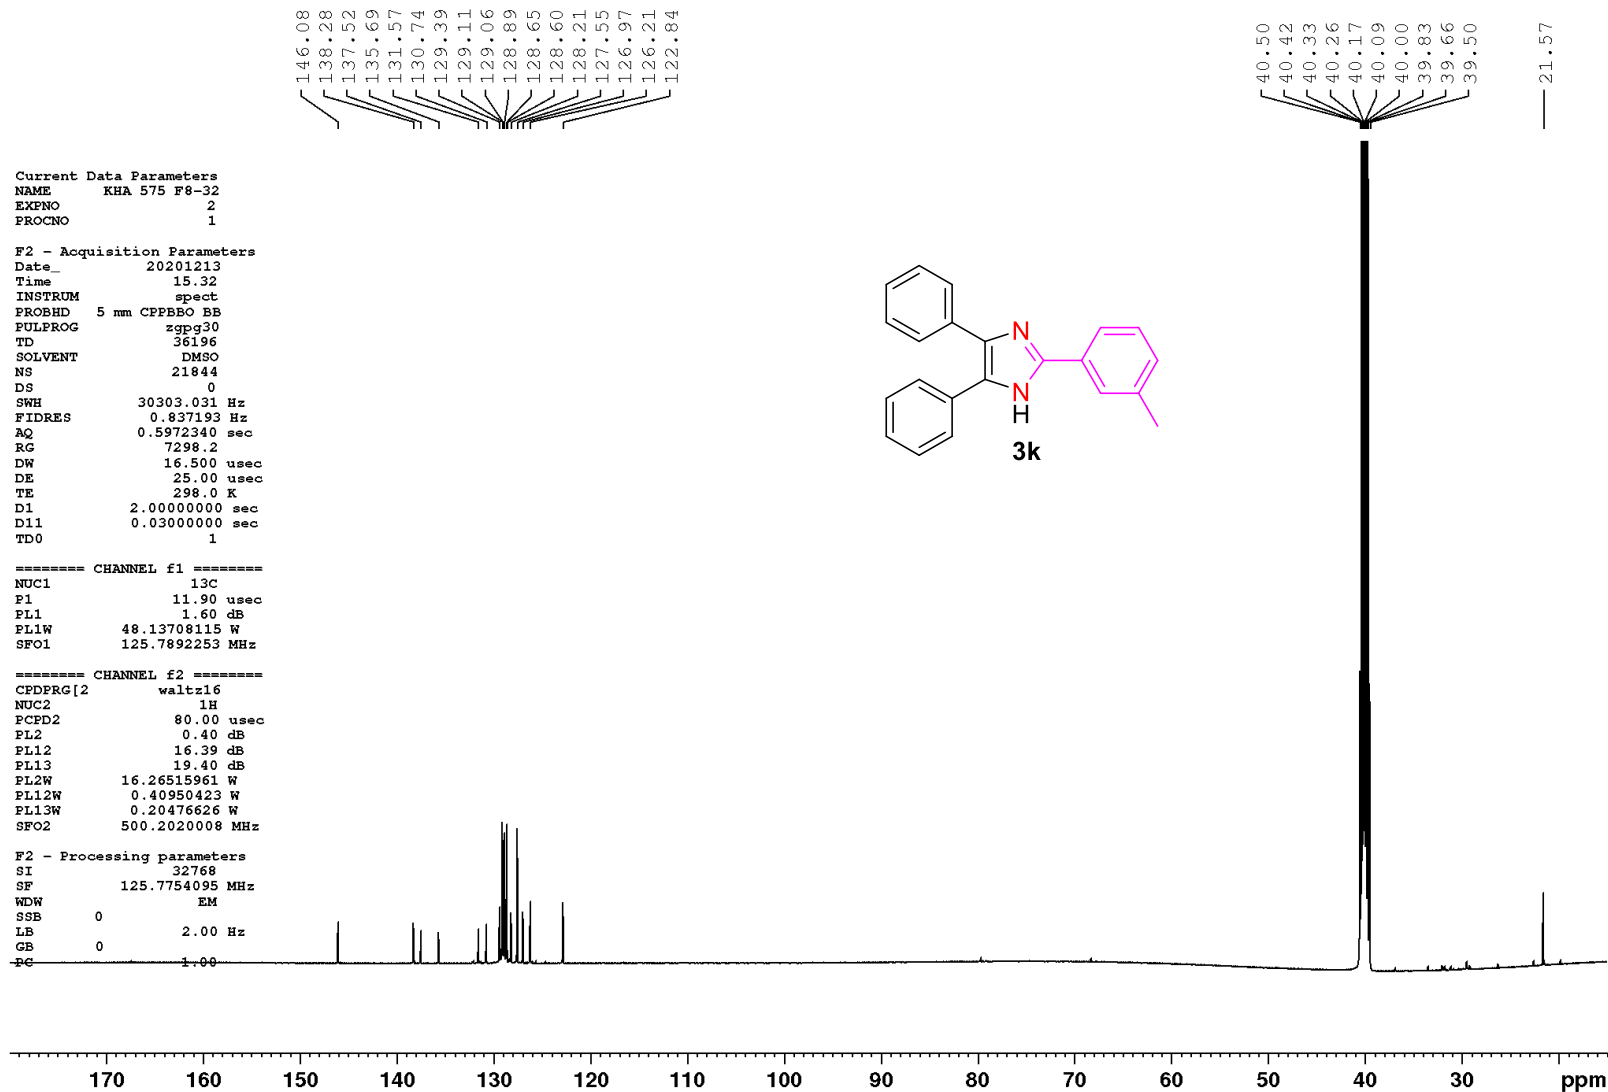

Figure S27. <sup>13</sup>C NMR spectrum of compound **3k** (125 MHz, DMSO-d<sub>6</sub>, 25 °C)

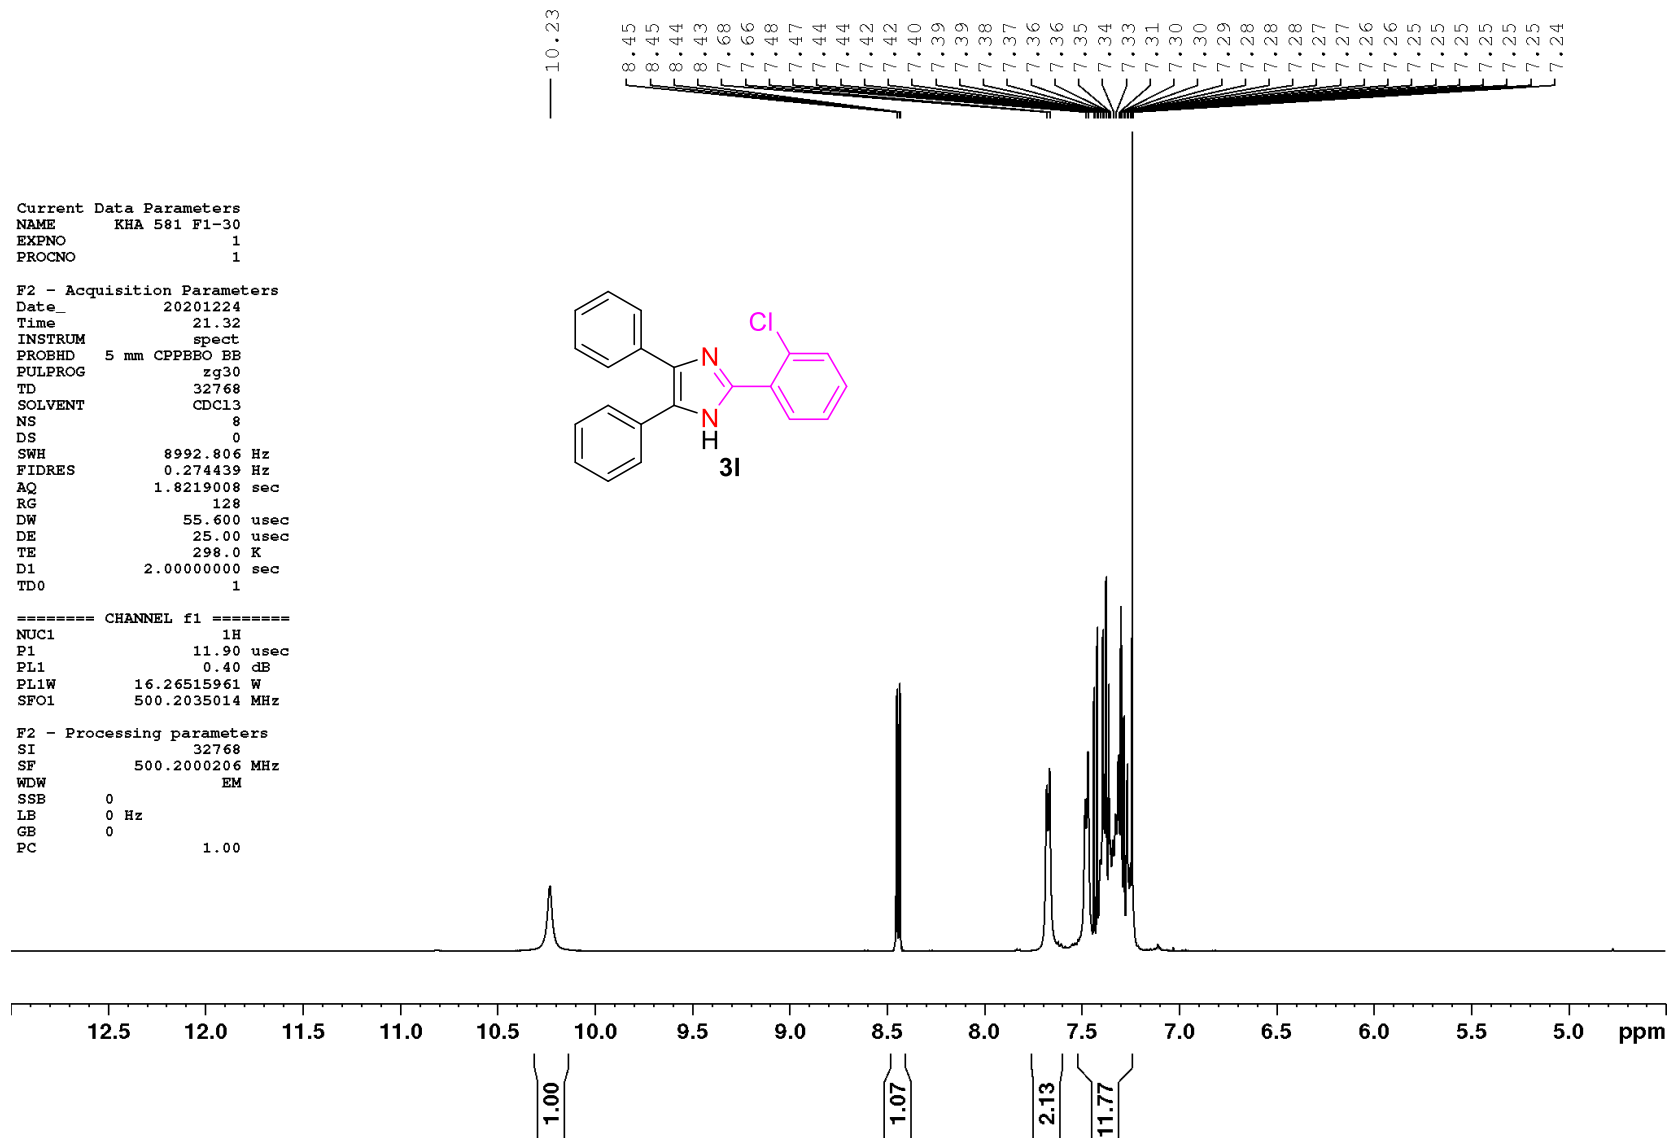

Figure S28. <sup>1</sup>H NMR spectrum of compound **31** (500 MHz, CDCl<sub>3</sub>, 25 °C)

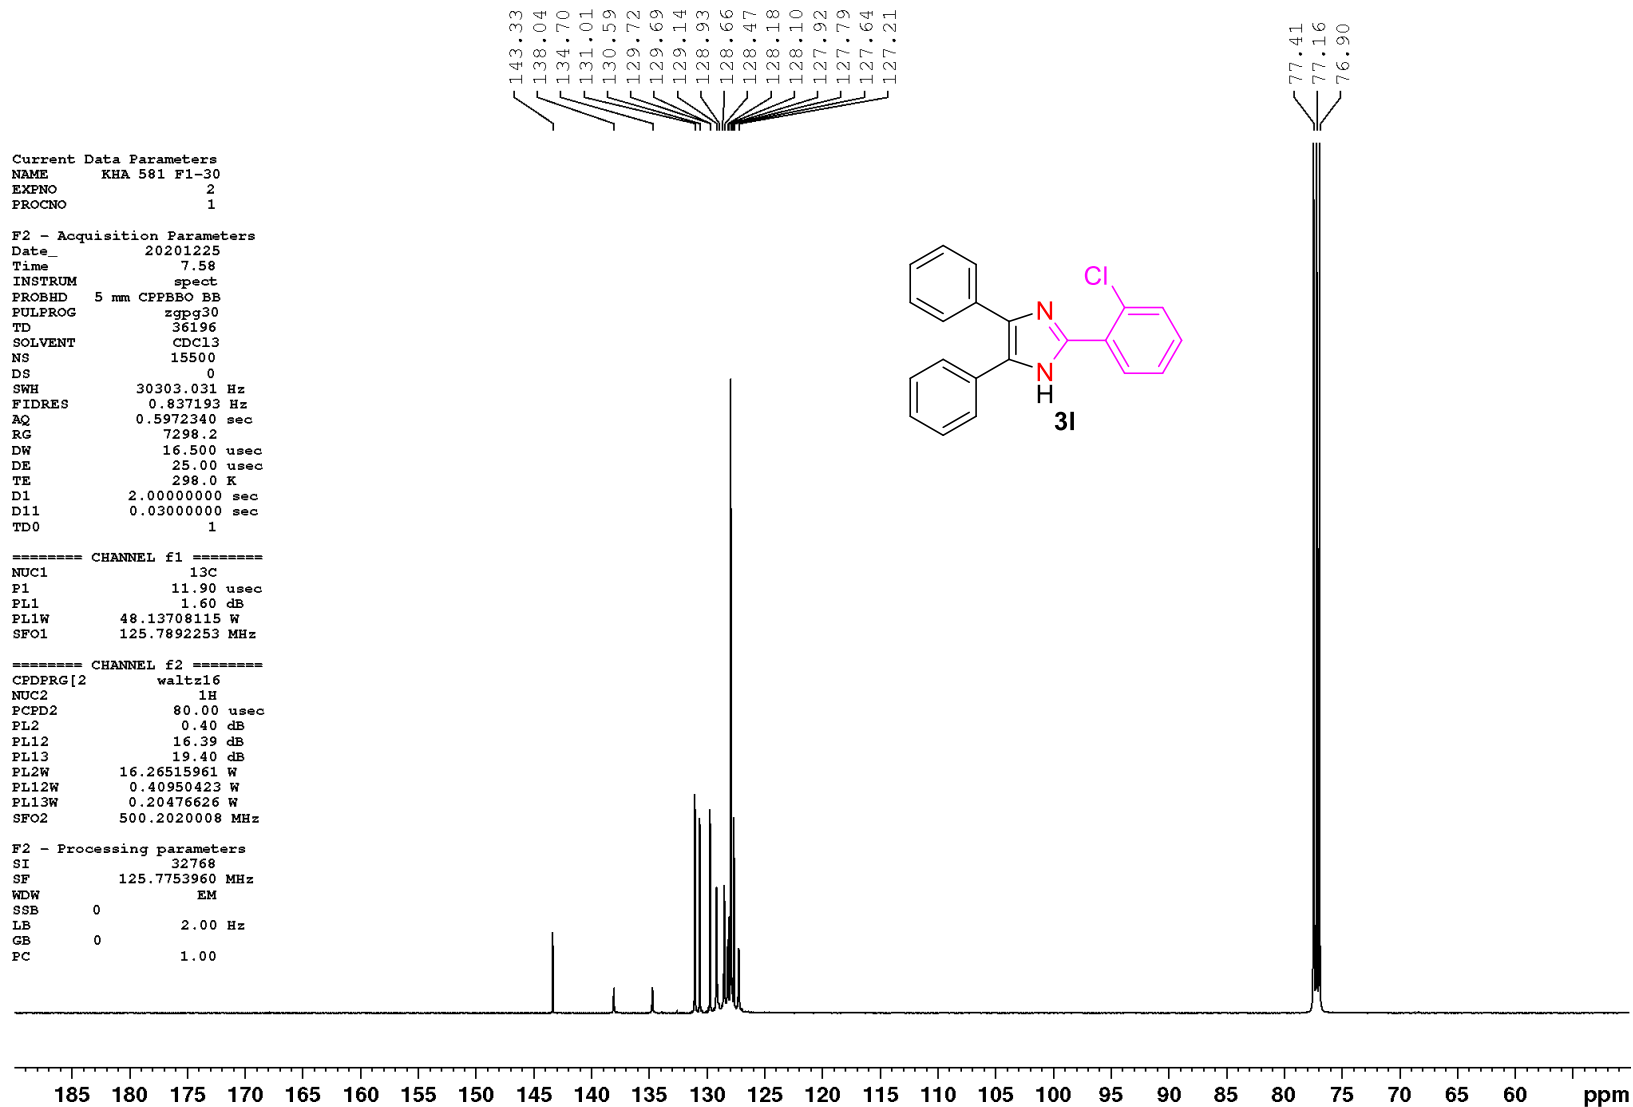

Figure S29.  $^{13}\text{C}$  NMR spectrum of compound **31** (125 MHz,  $\text{CDCl}_3$ , 25  $^\circ\text{C}$ )

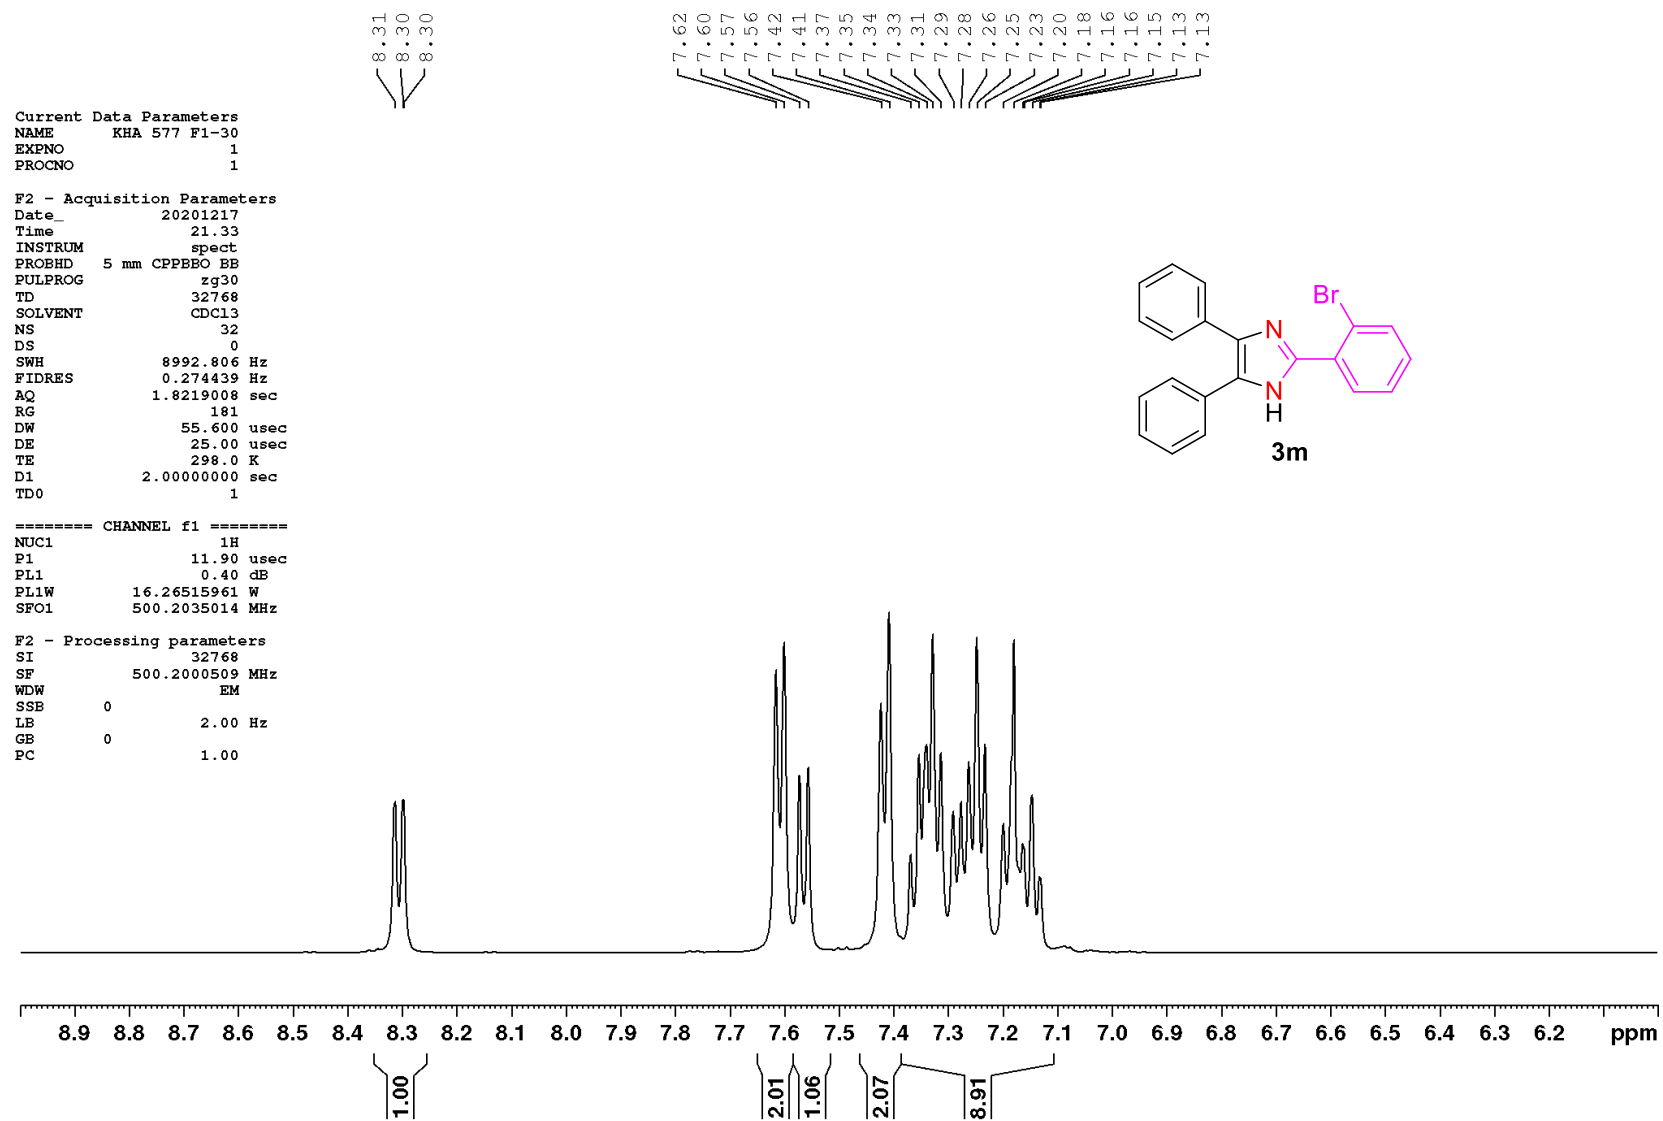

Figure S30. <sup>1</sup>H NMR spectrum of compound **3m** (500 MHz, CDCl<sub>3</sub>, 25 °C)



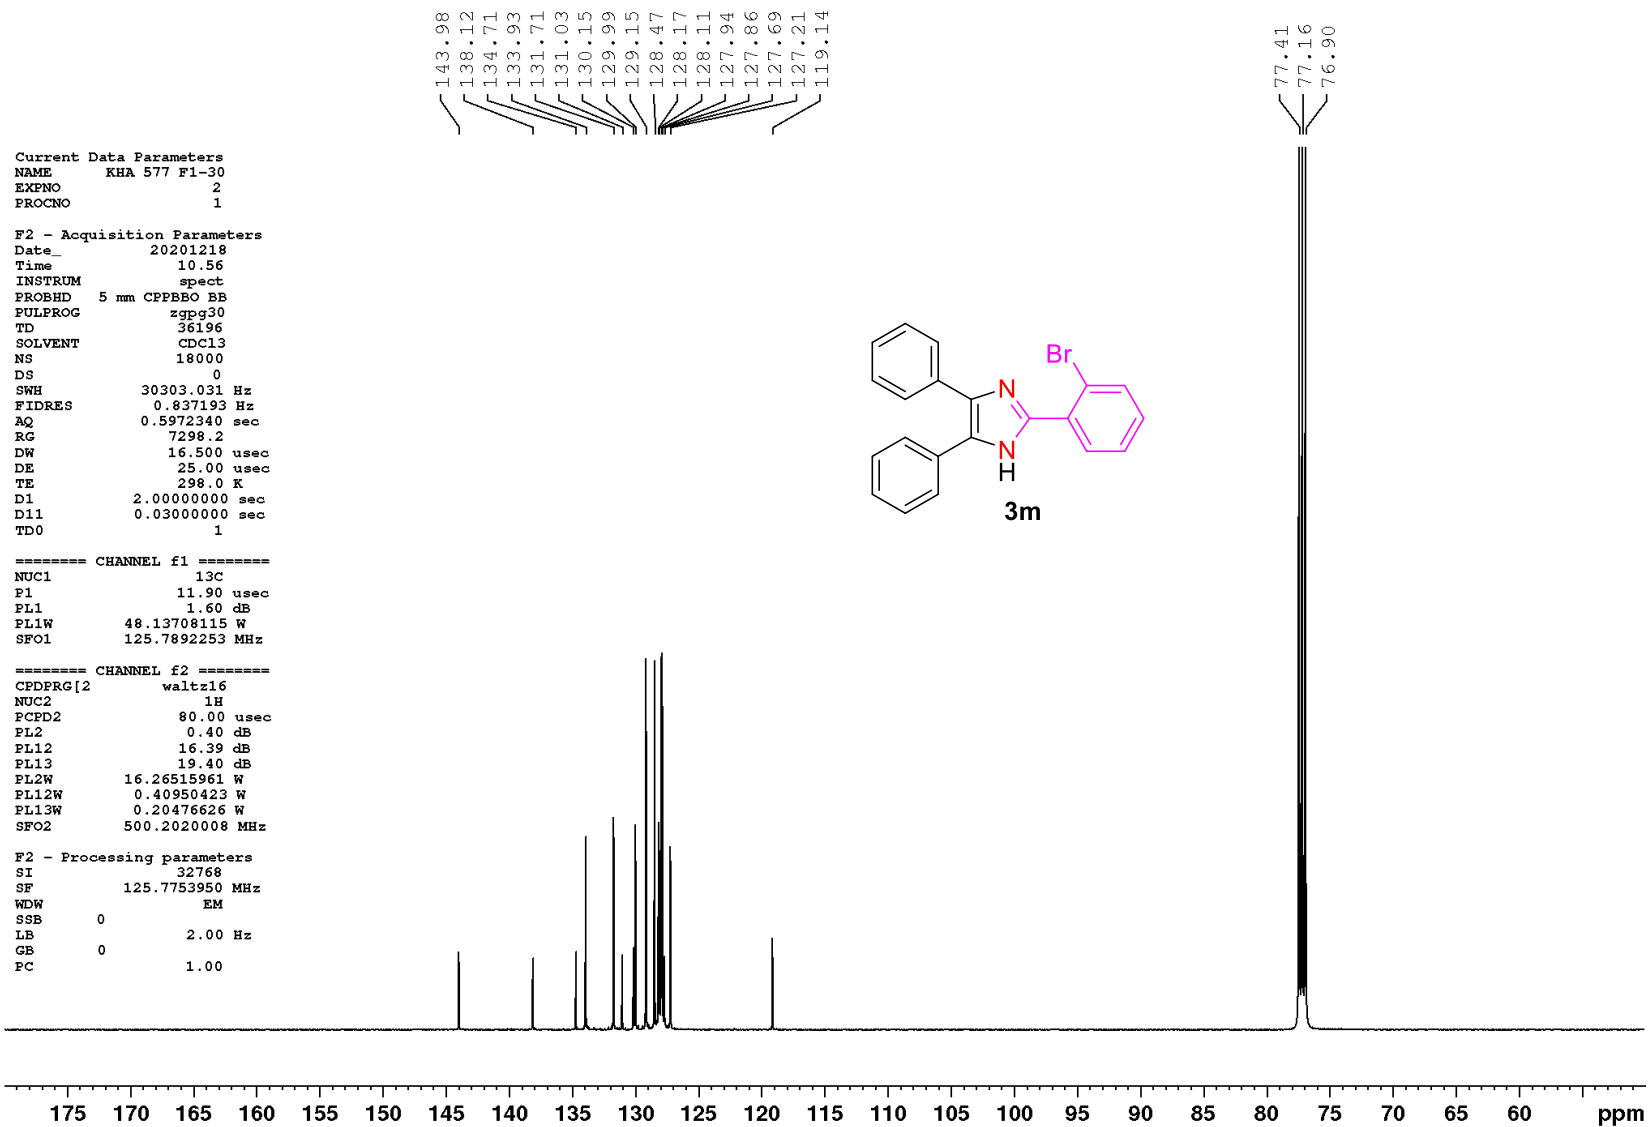

Figure S31. <sup>13</sup>C NMR spectrum of compound **3m** (125 MHz, CDCl<sub>3</sub>, 25 °C)

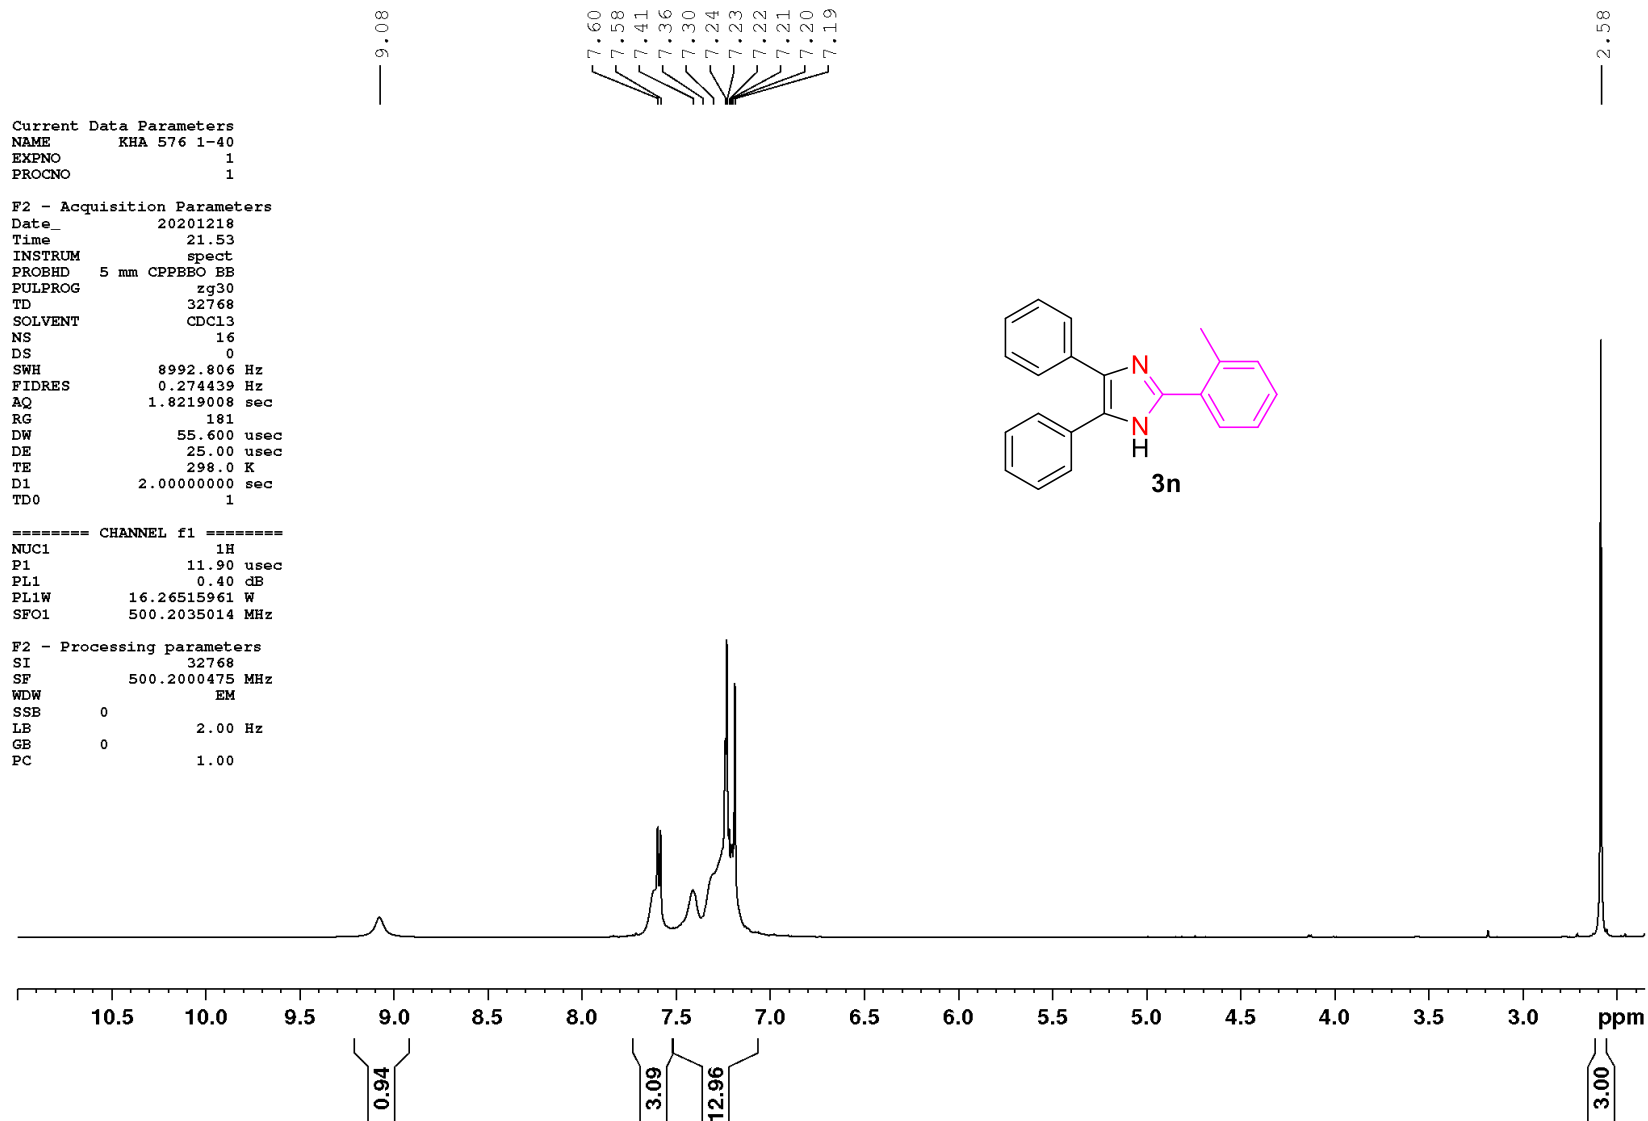

Figure S32. <sup>1</sup>H NMR spectrum of compound **3n** (500 MHz, CDCl<sub>3</sub>, 25 °C)

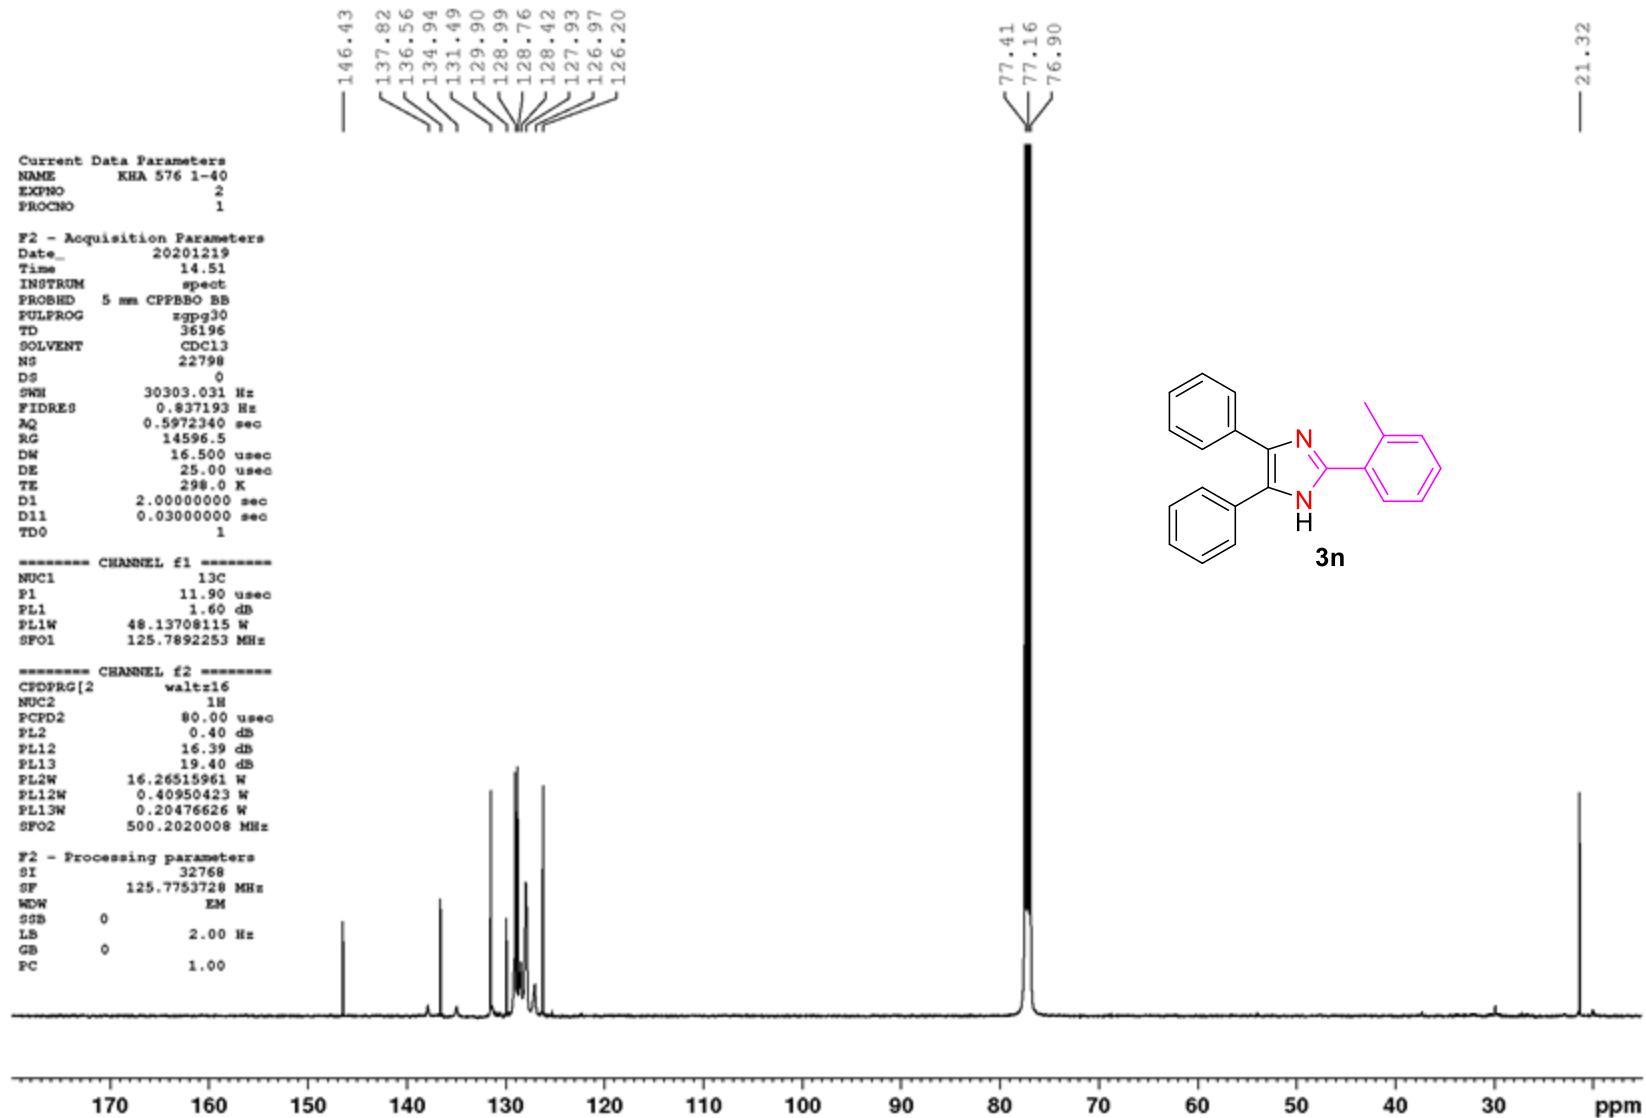

Figure S33.  $^{13}\text{C}$  NMR spectrum of compound **3n** (125 MHz,  $\text{CDCl}_3$ , 25  $^\circ\text{C}$ )

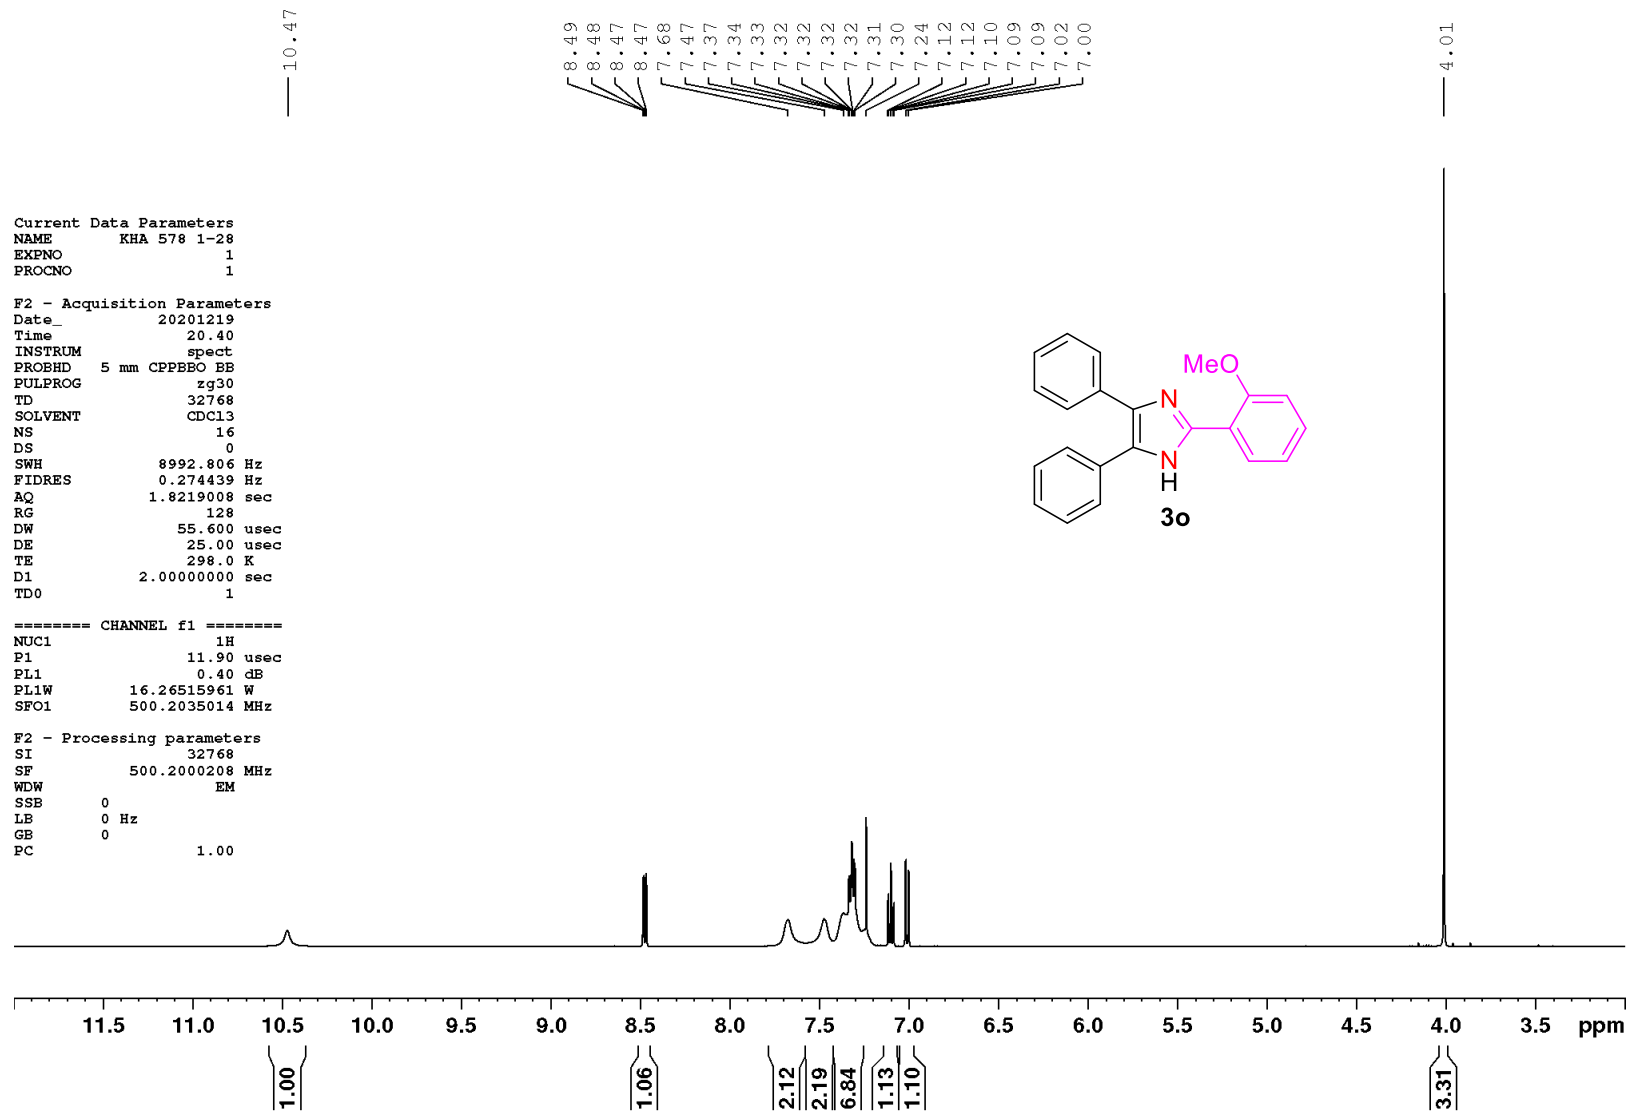

Figure S34. <sup>1</sup>H NMR spectrum of compound **3o** (500 MHz, CDCl<sub>3</sub>, 25 °C)

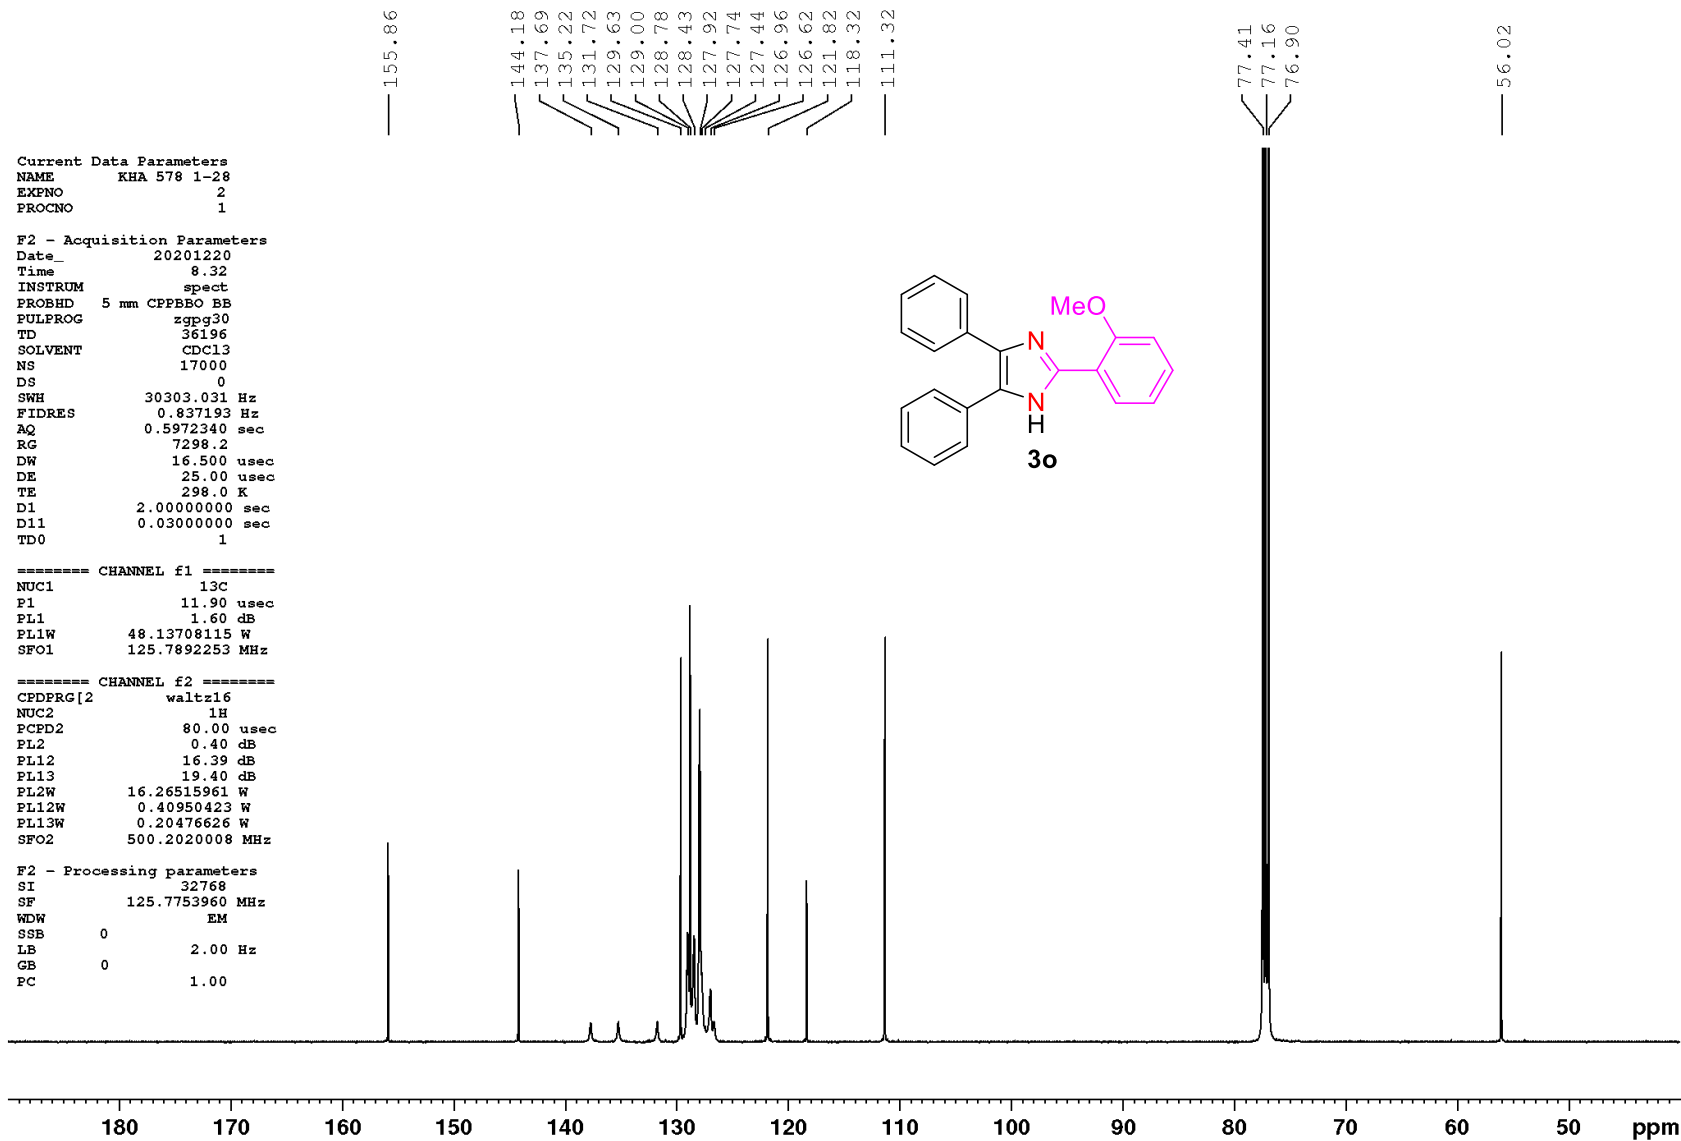

Figure S35. <sup>13</sup>C NMR spectrum of compound **3o** (125 MHz, CDCl<sub>3</sub>, 25 °C)

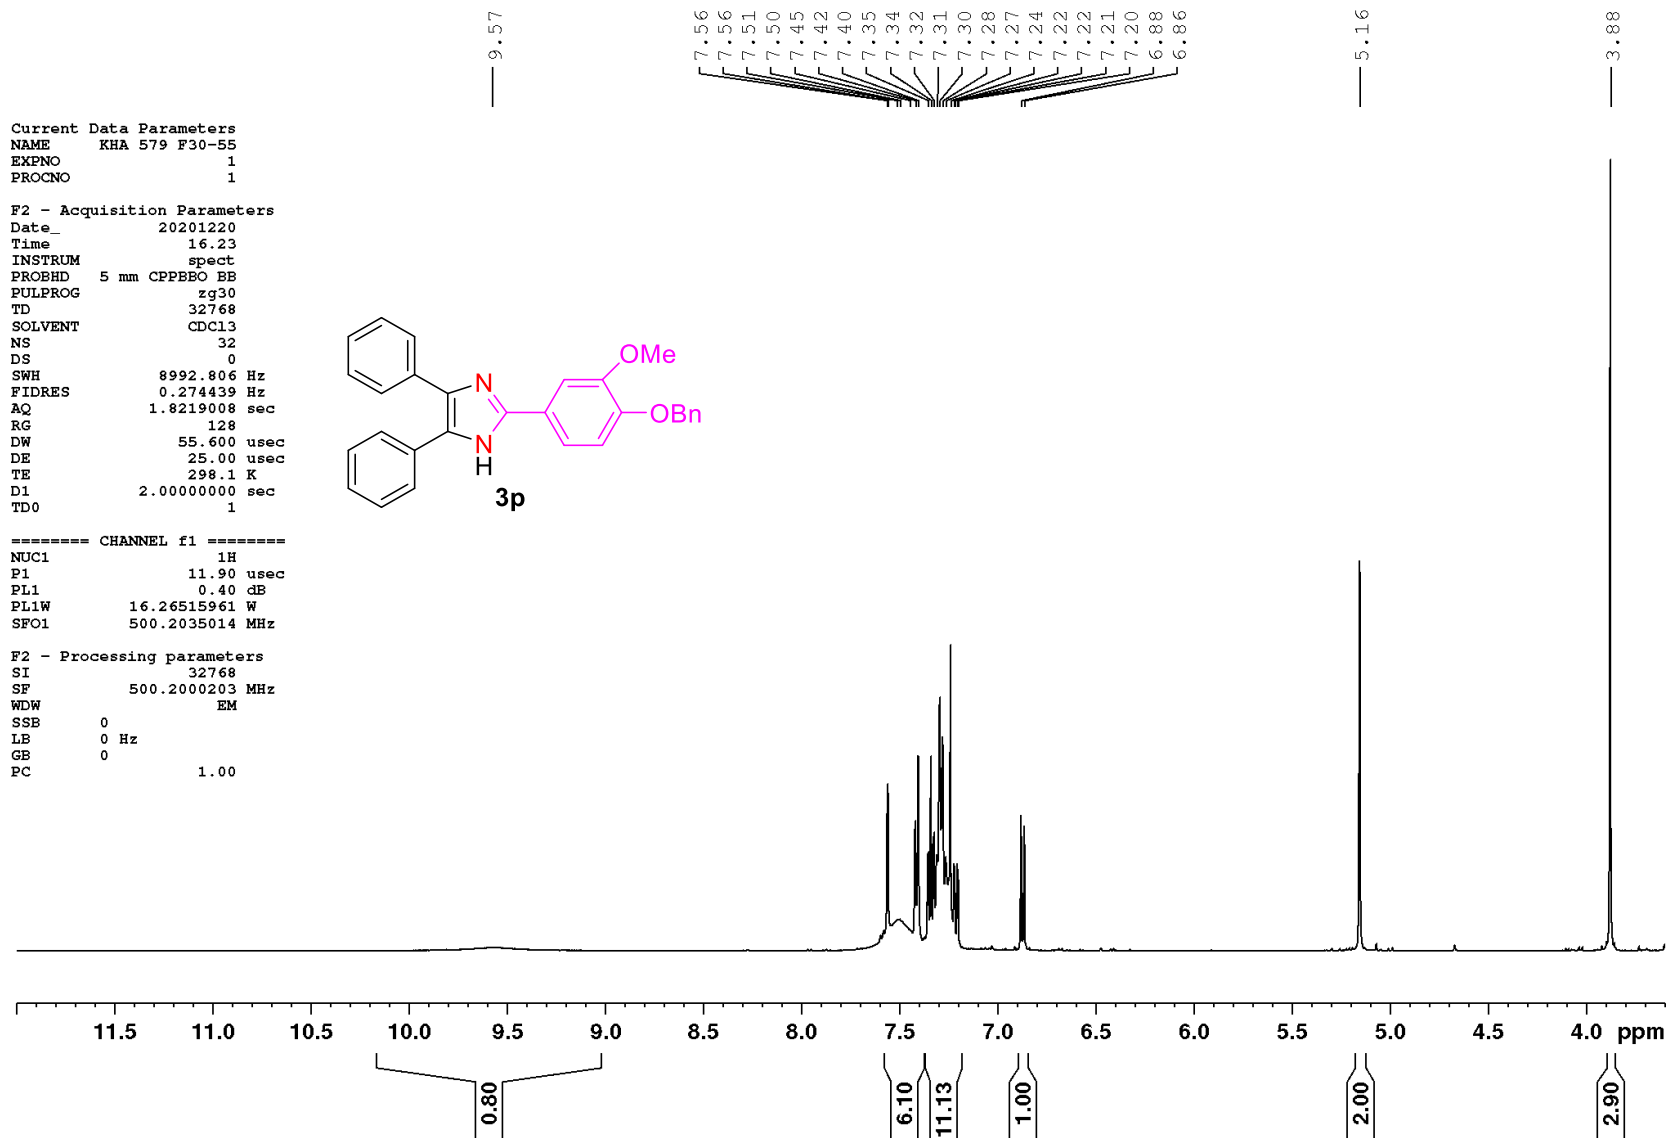

Figure S36. <sup>1</sup>H NMR spectrum of compound **3p** (500 MHz, CDCl<sub>3</sub>, 25 °C)

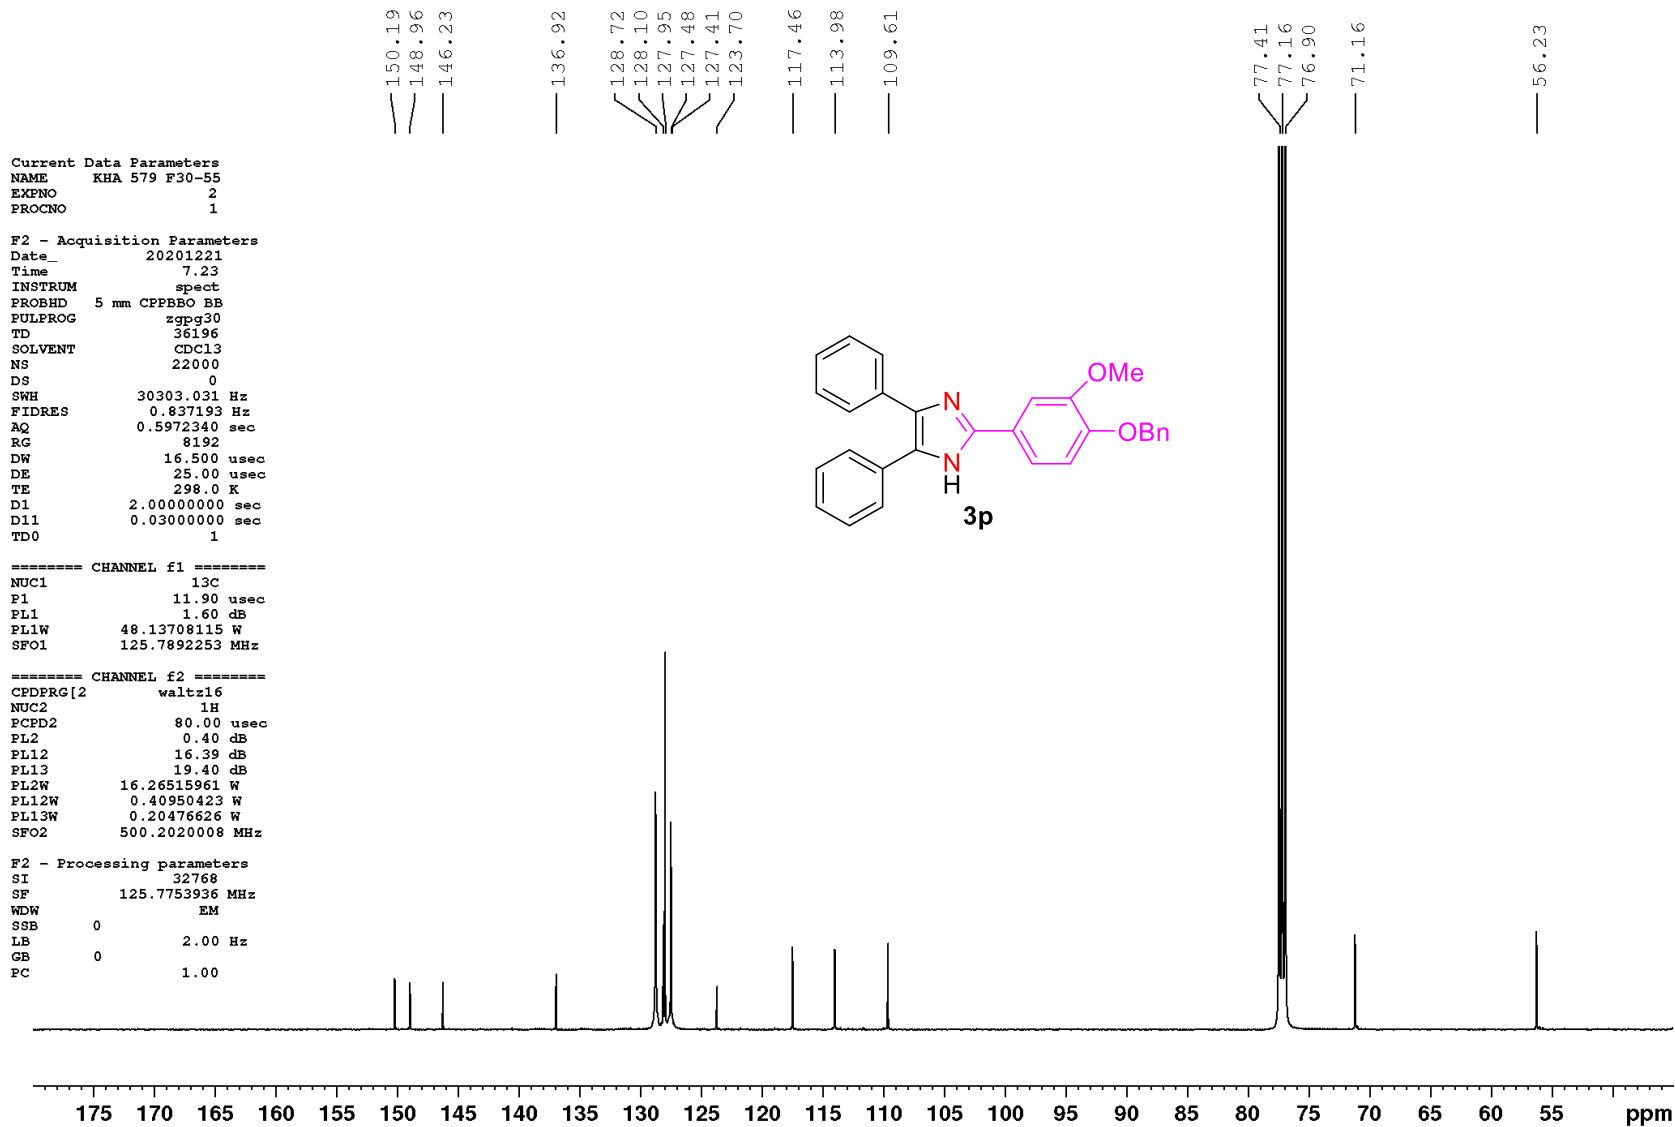

Figure S37. <sup>13</sup>C NMR spectrum of compound **3p** (125 MHz, CDCl<sub>3</sub>, 25 °C)

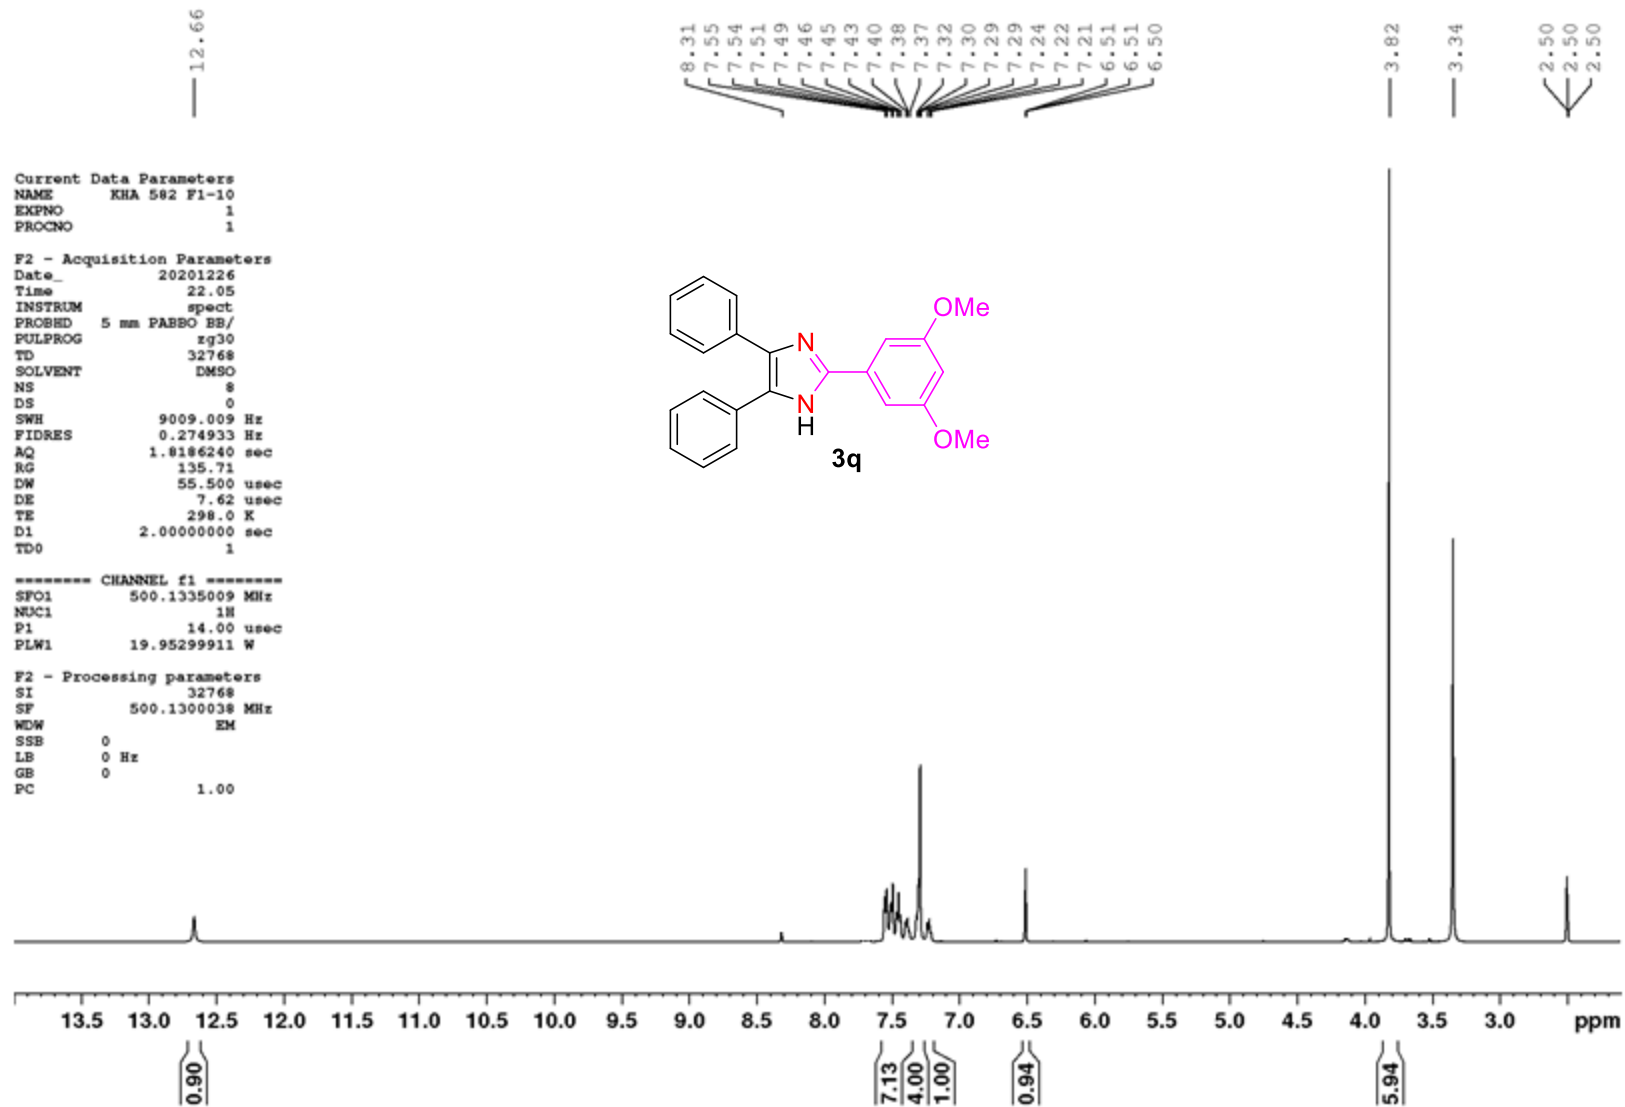

Figure S38. <sup>1</sup>H NMR spectrum of compound **3q** (500 MHz, DMSO-d<sub>6</sub>, 25 °C)



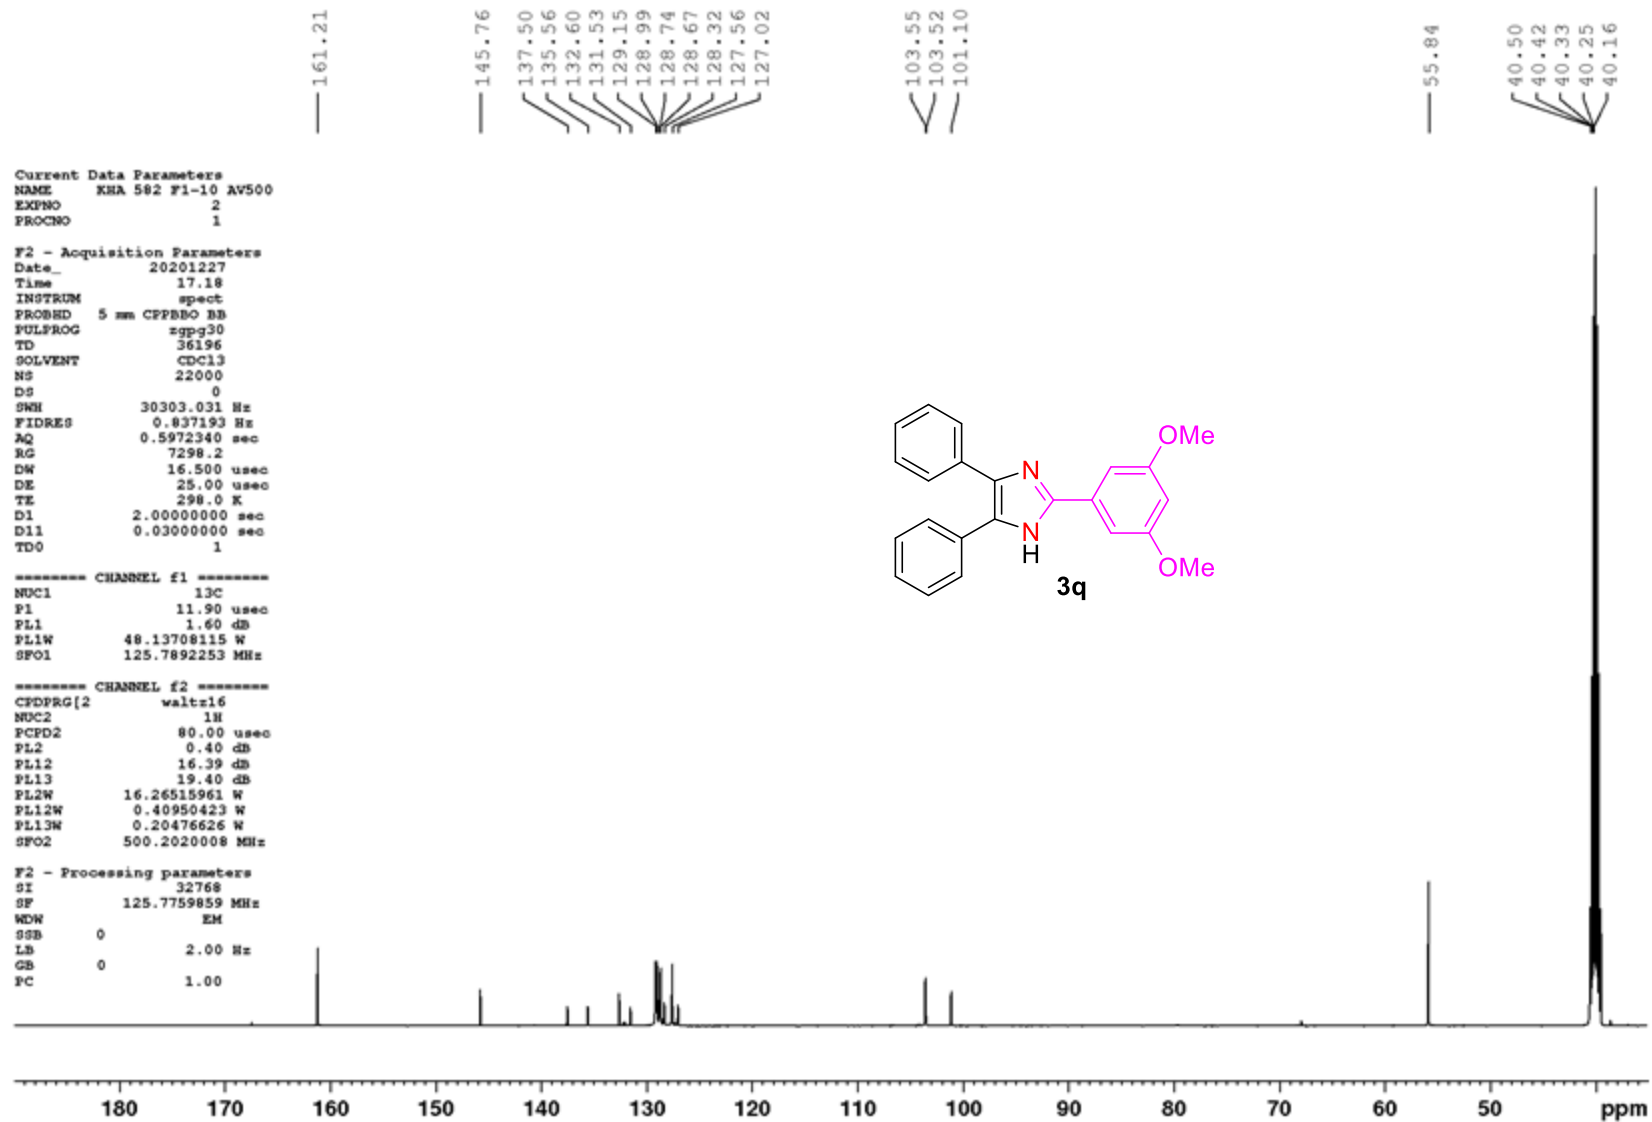

Figure S39. <sup>13</sup>C NMR spectrum of compound **3q** (125 MHz, DMSO-d<sub>6</sub>, 25 °C)

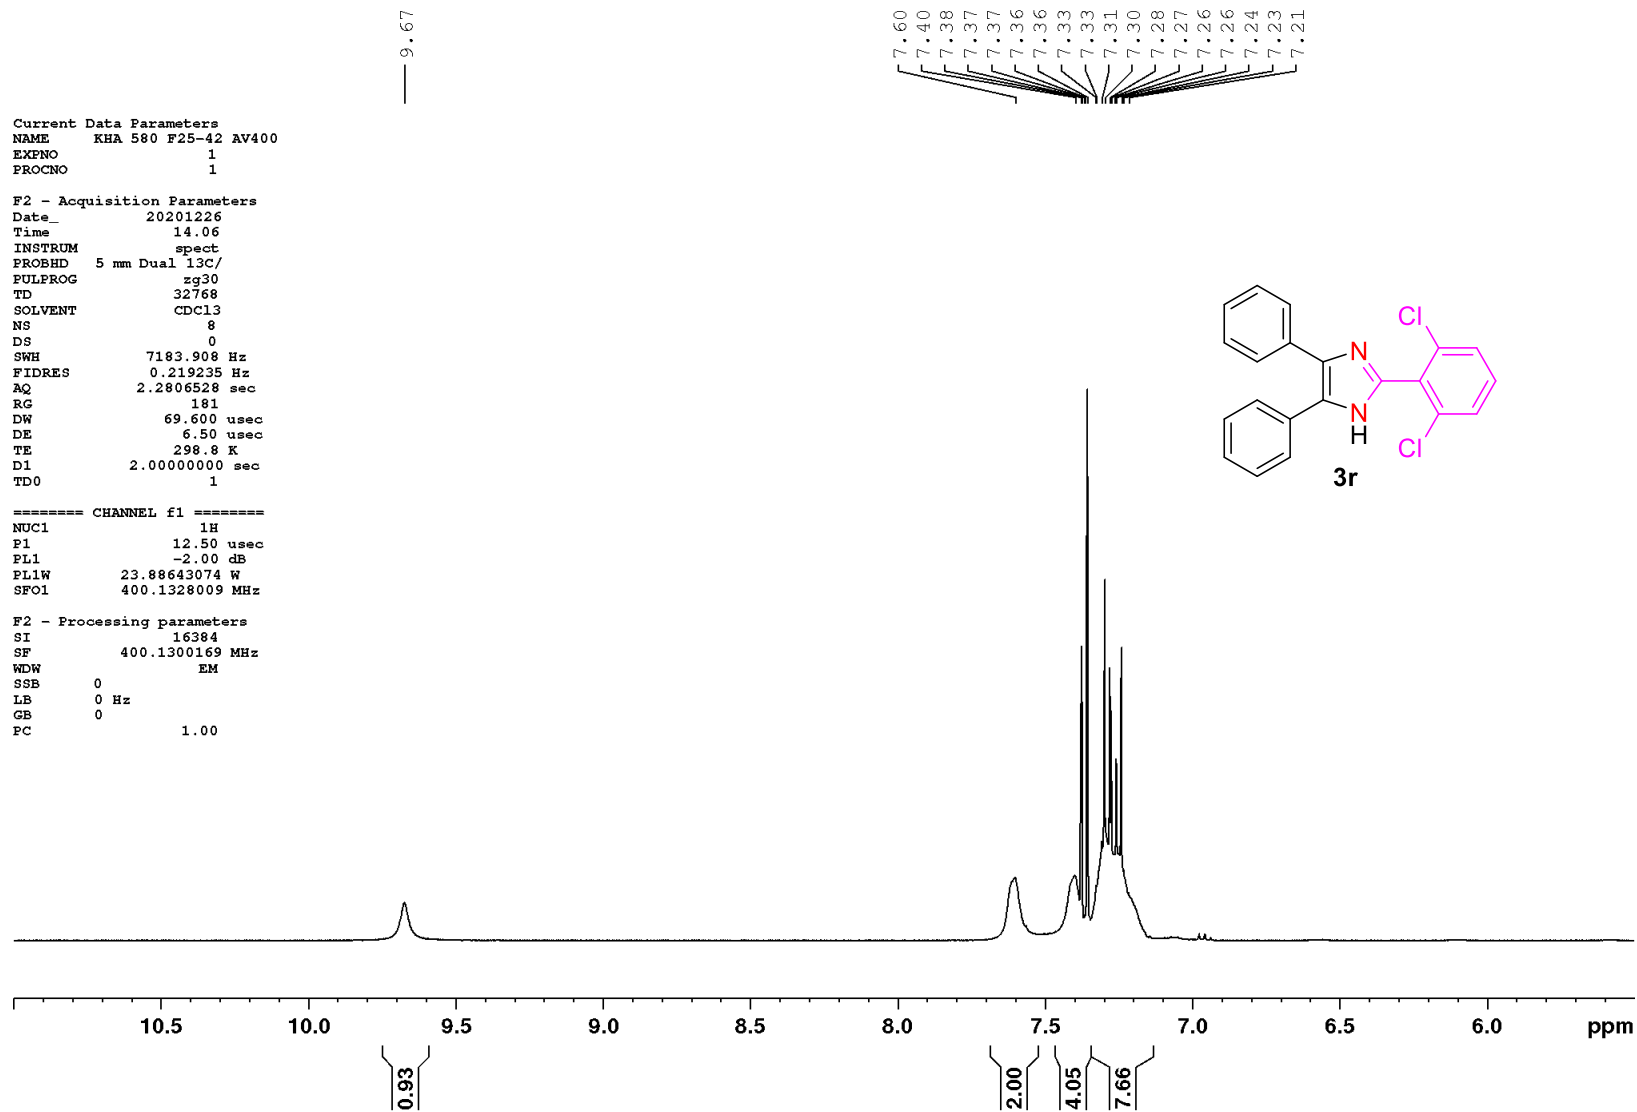

Figure S40. <sup>1</sup>H NMR spectrum of compound **3r** (400 MHz, CDCl<sub>3</sub>, 25 °C)

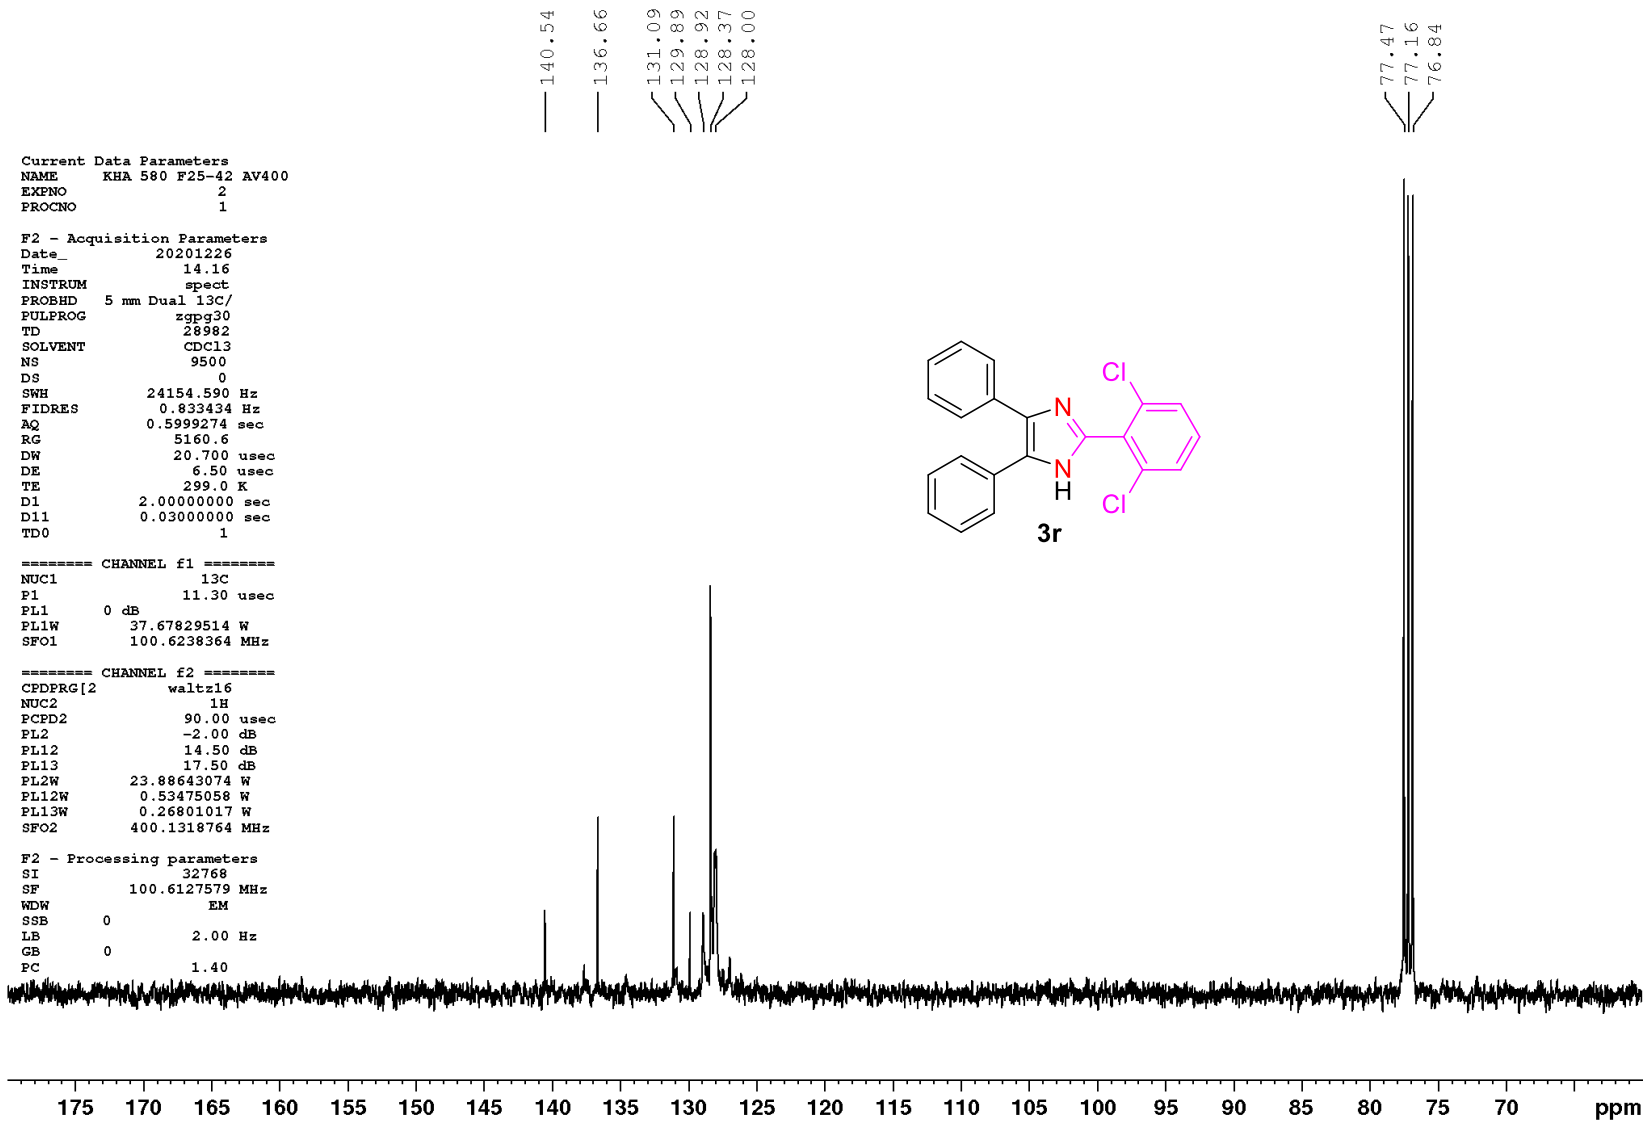

Figure S41.  $^{13}\text{C}$  NMR spectrum of compound **3r** (100 MHz,  $\text{CDCl}_3$ , 25  $^\circ\text{C}$ )

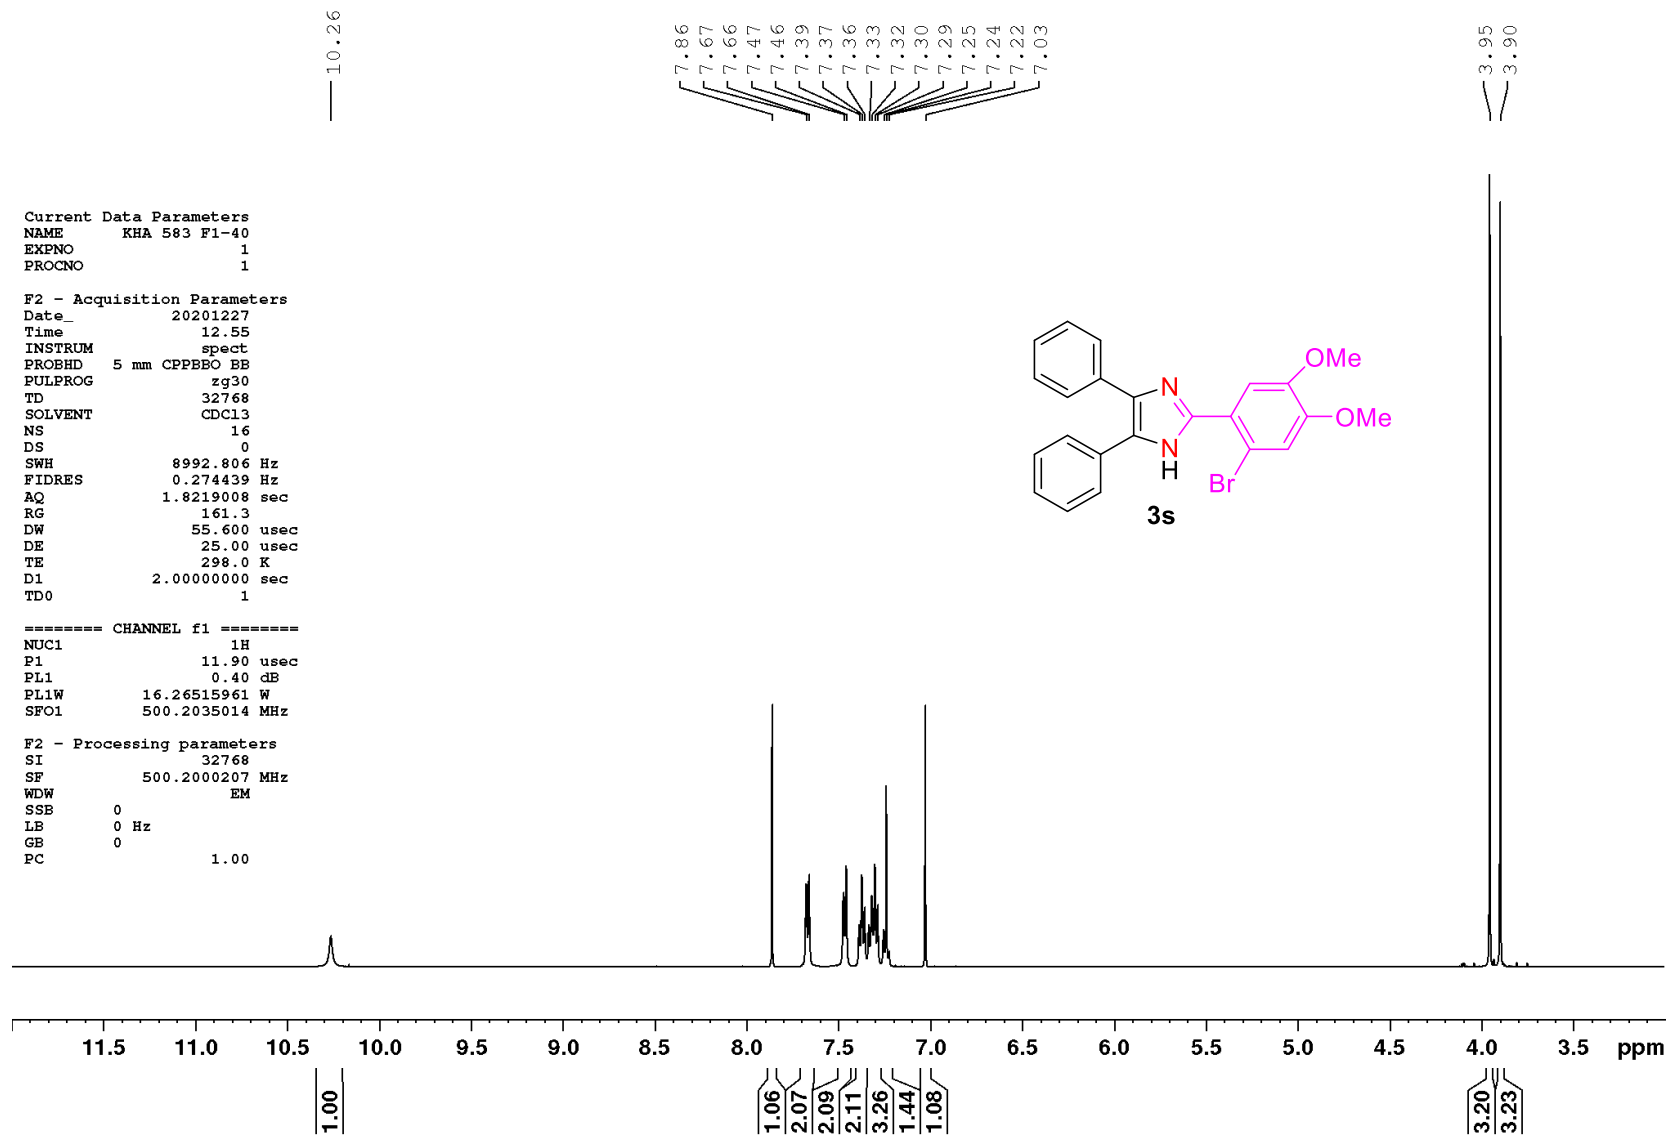

Figure S42.  $^1\text{H}$  NMR spectrum of compound **3s** (500 MHz,  $\text{CDCl}_3$ , 25  $^\circ\text{C}$ )

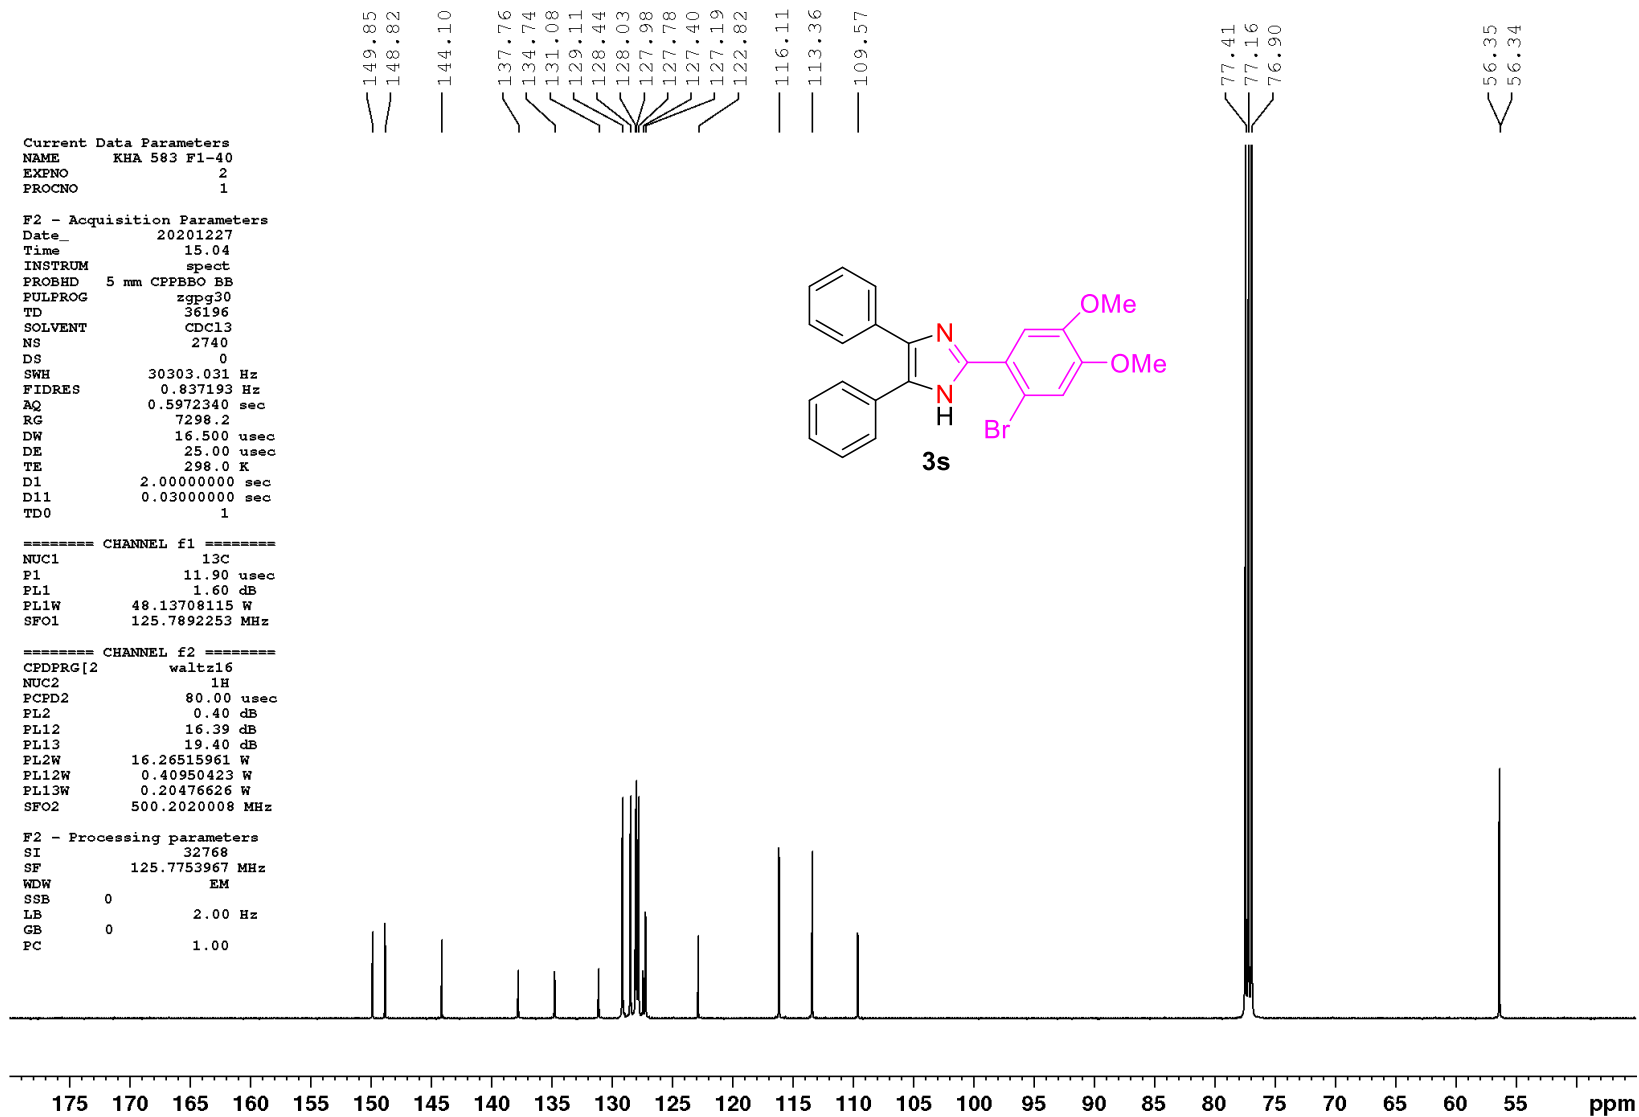

Figure S43.  $^{13}\text{C}$  NMR spectrum of compound **3s** (125 MHz,  $\text{CDCl}_3$ , 25  $^\circ\text{C}$ )

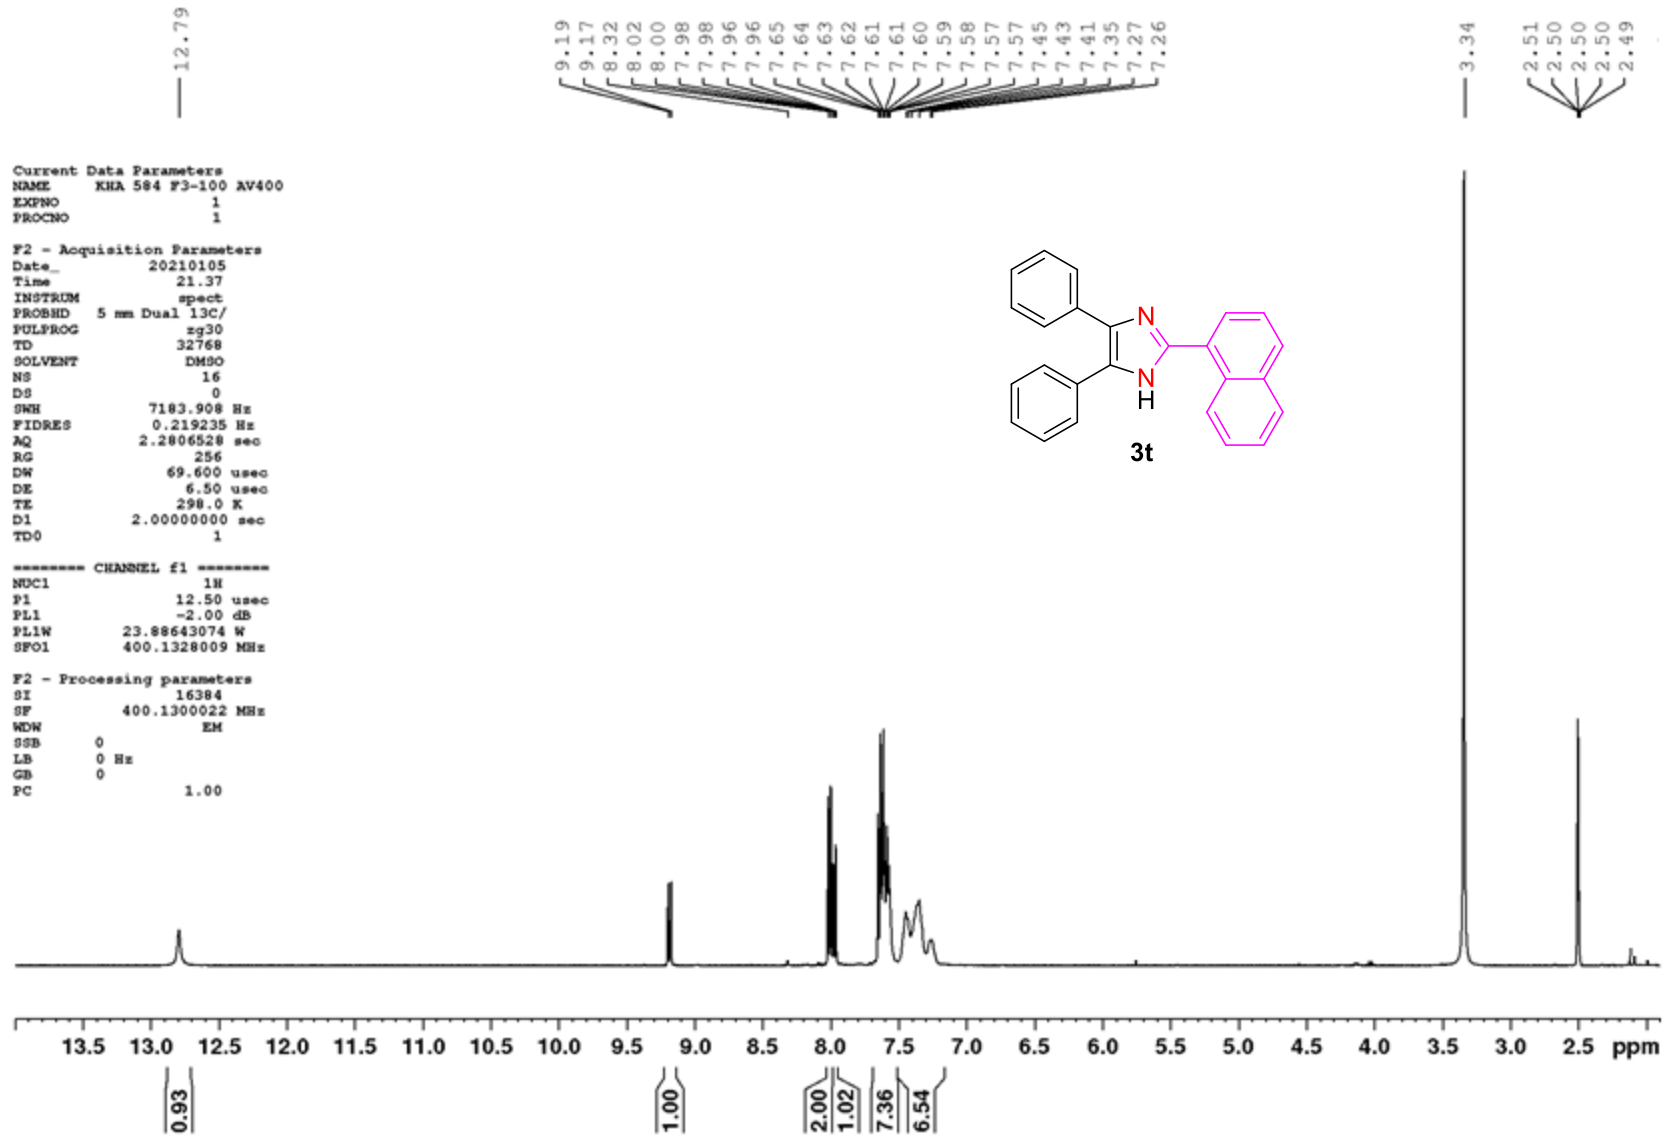

Figure S44. <sup>1</sup>H NMR spectrum of compound **3t** (400 MHz, DMSO-d<sub>6</sub>, 25 °C)

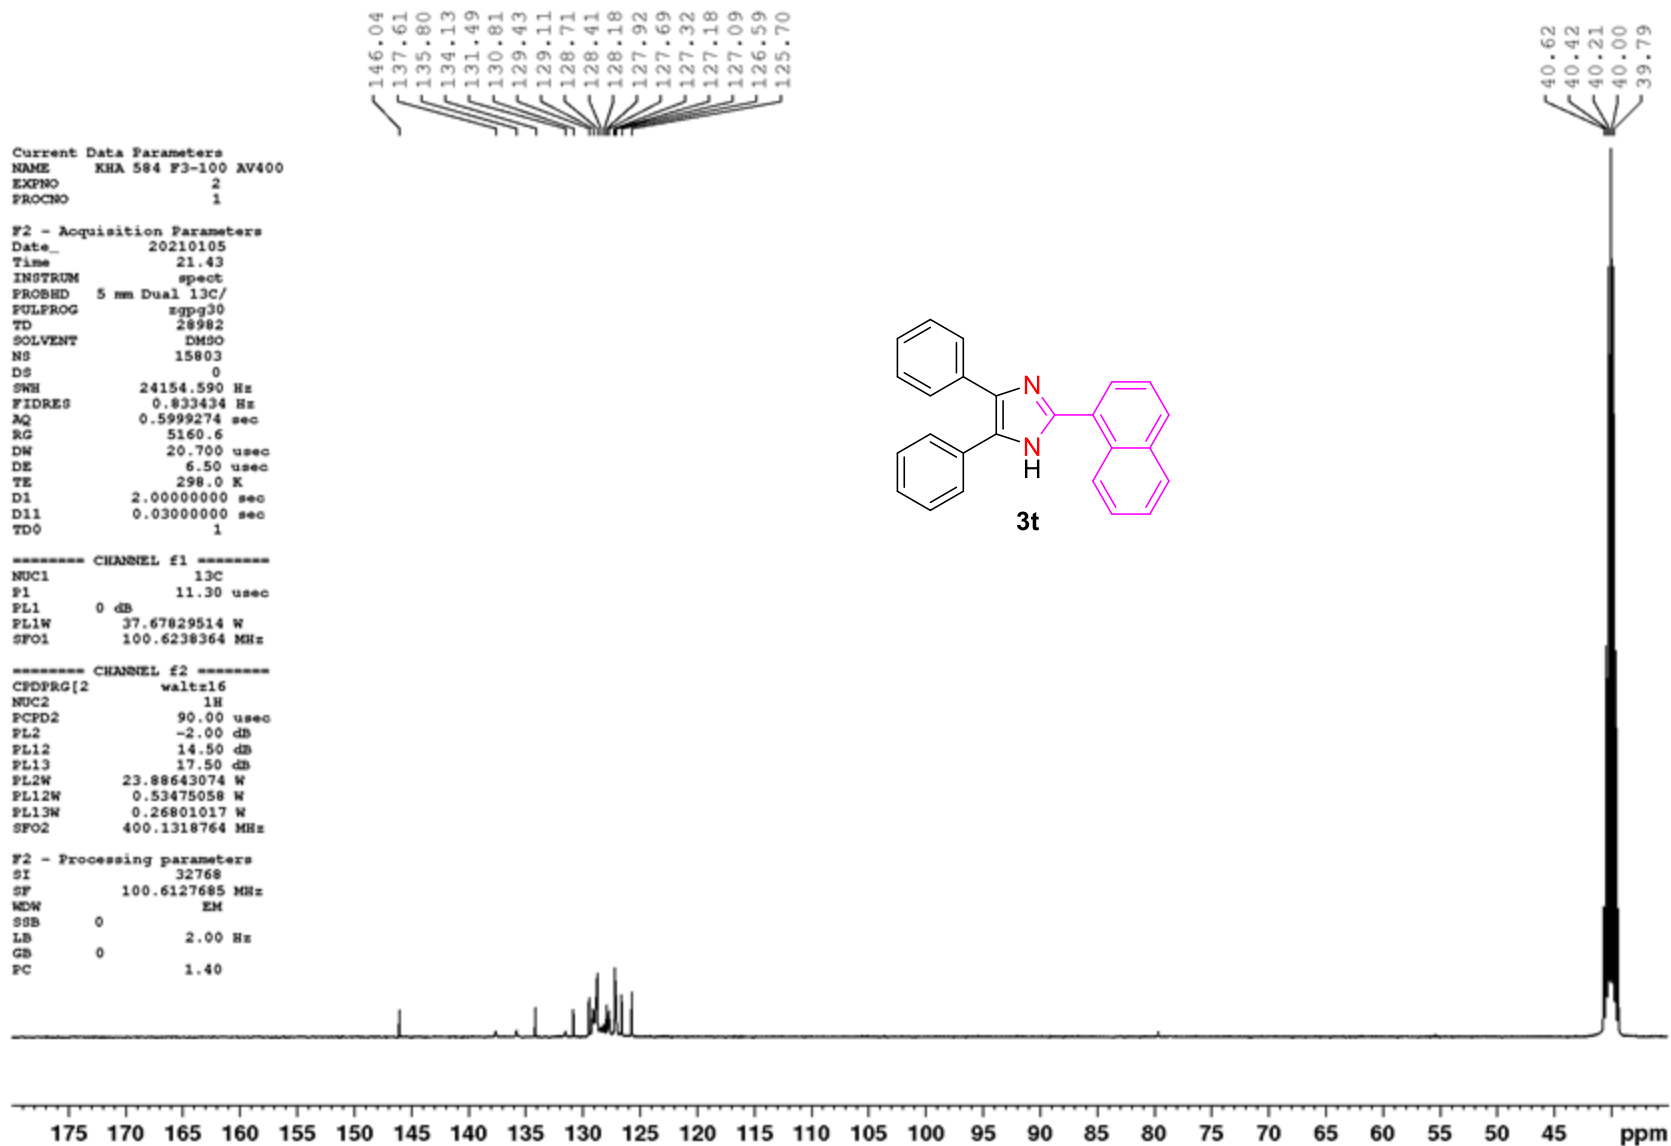

Figure S45. <sup>13</sup>C NMR spectrum of compound **3t** (100 MHz, DMSO-d<sub>6</sub>, 25 °C)

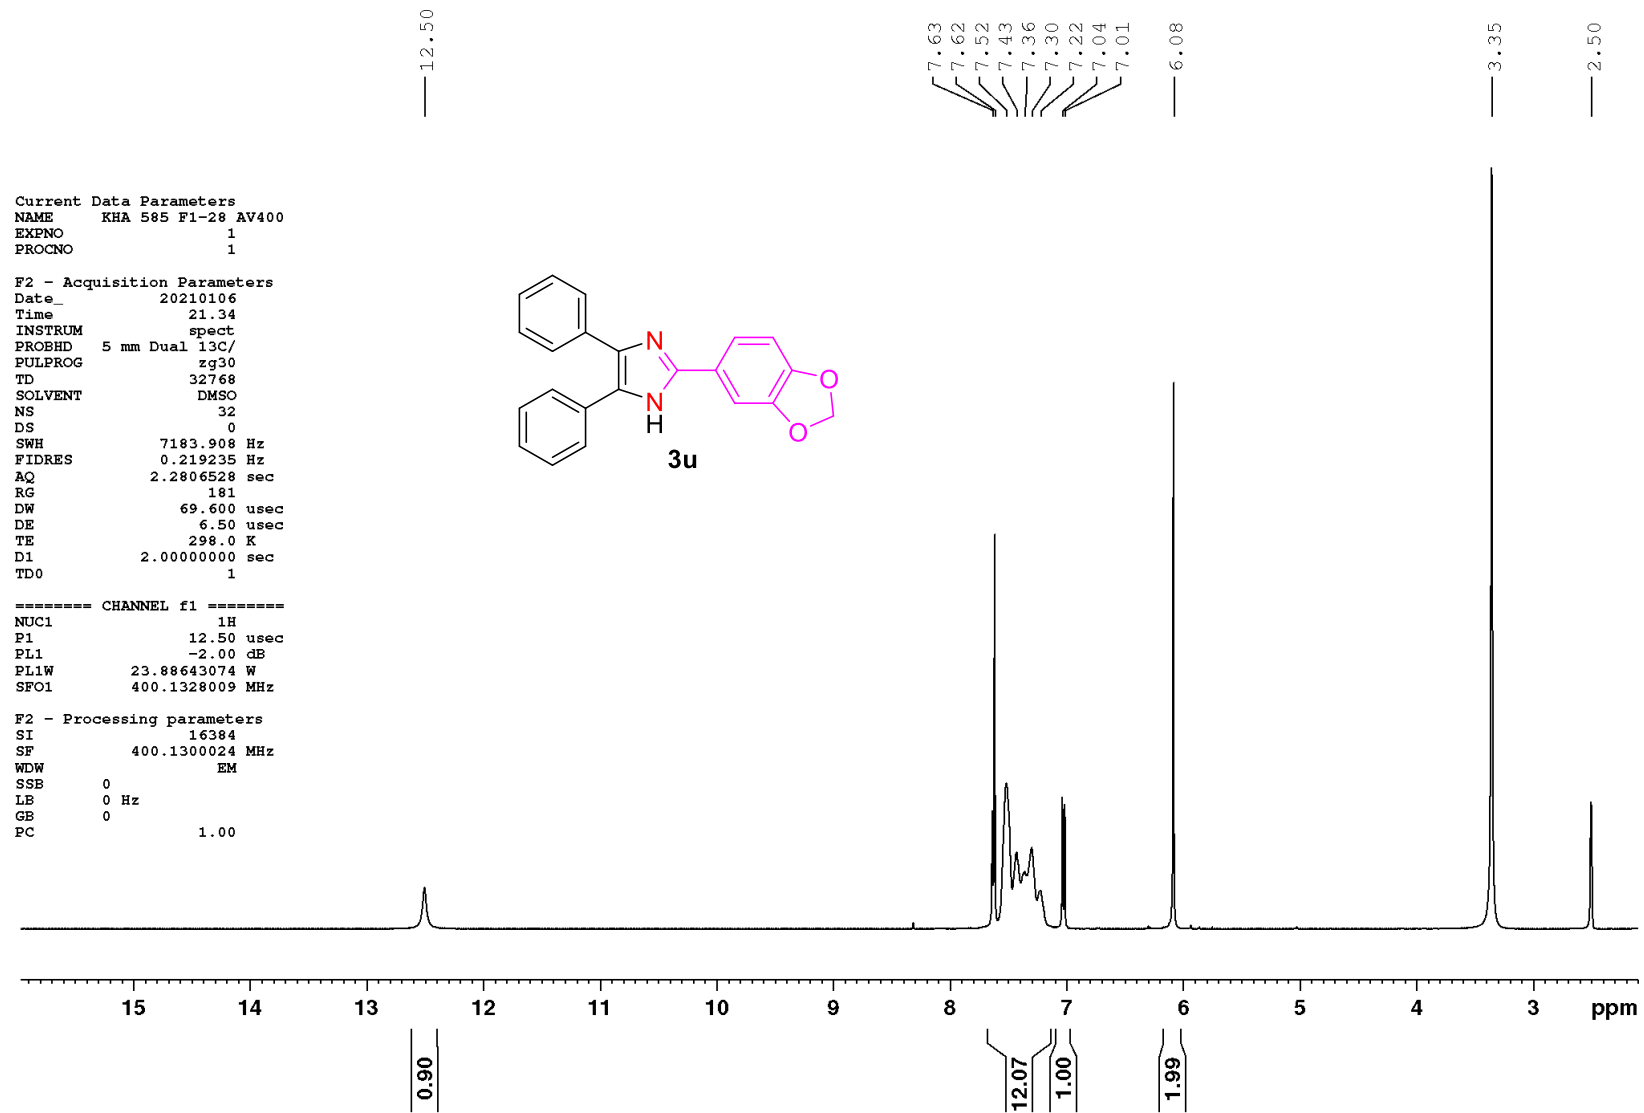

Figure S46. <sup>1</sup>H NMR spectrum of compound **3u** (400 MHz, DMSO-d<sub>6</sub>, 25 °C)



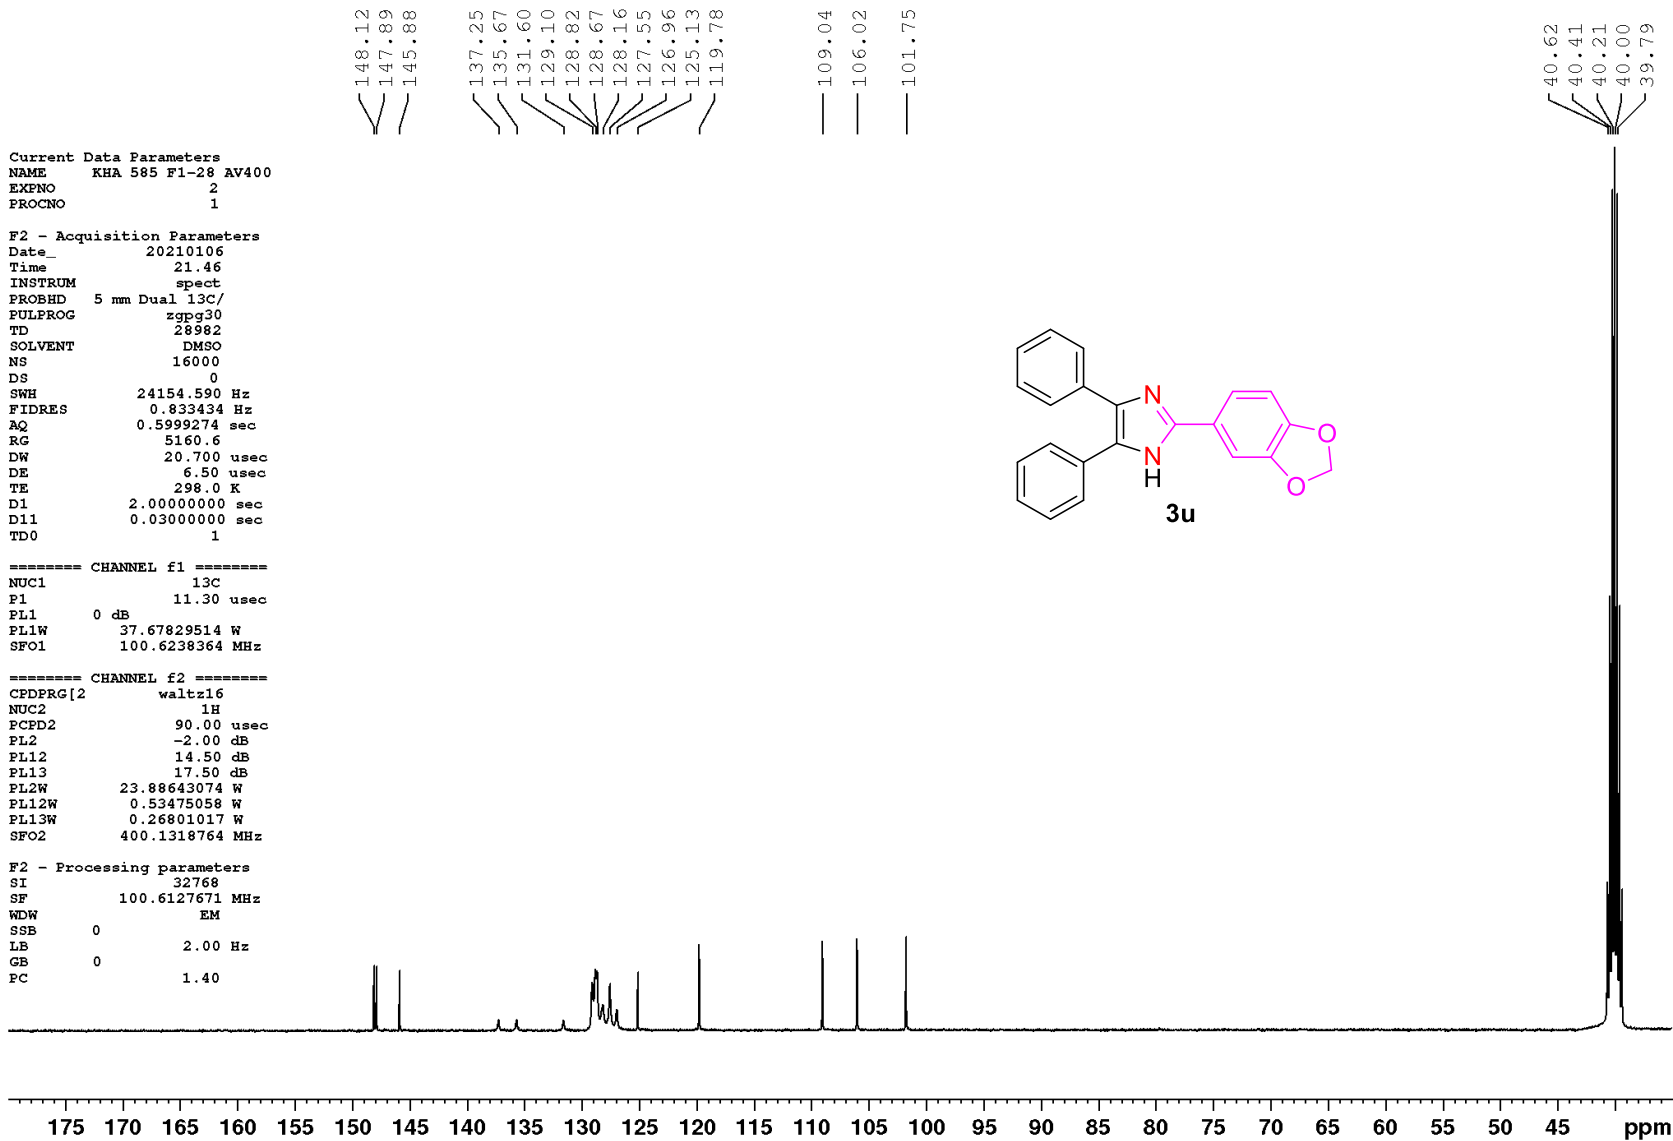

Figure S47. <sup>13</sup>C NMR spectrum of compound **3u** (100 MHz, DMSO-d<sub>6</sub>, 25 °C)

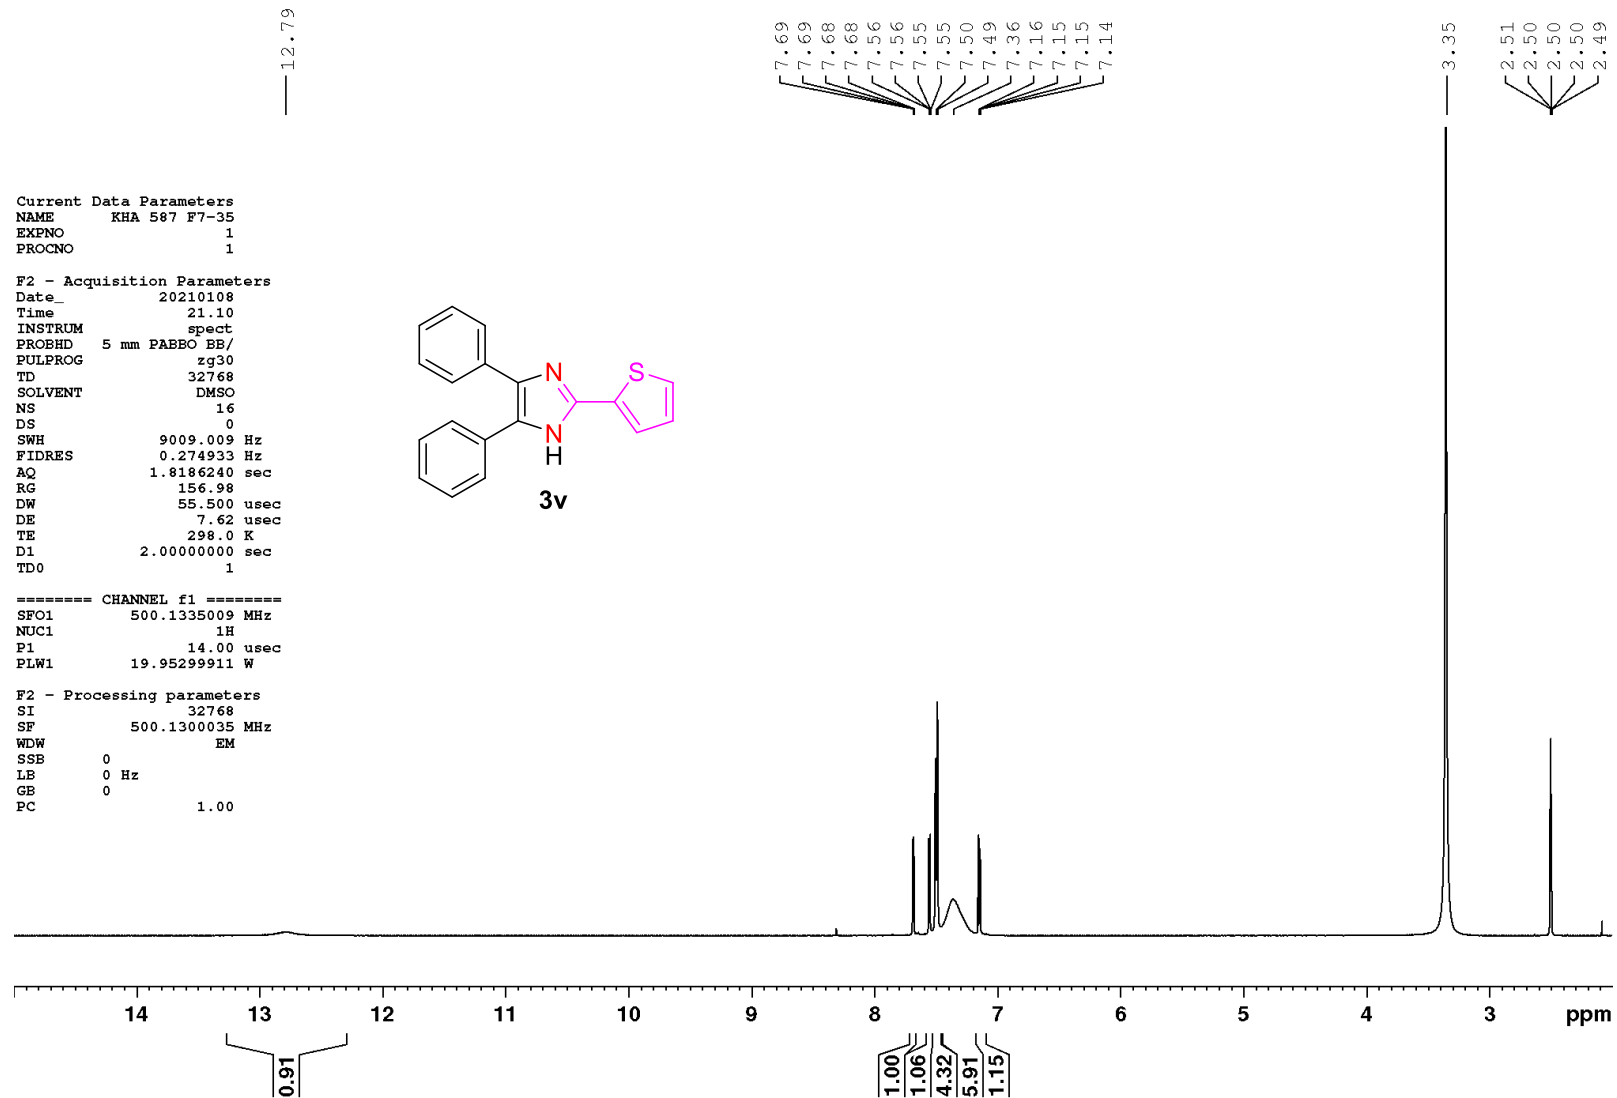

**Figure S48.**  $^1\text{H}$  NMR spectrum of compound **3v** (500 MHz, DMSO- $d_6$ , 25  $^\circ\text{C}$ )

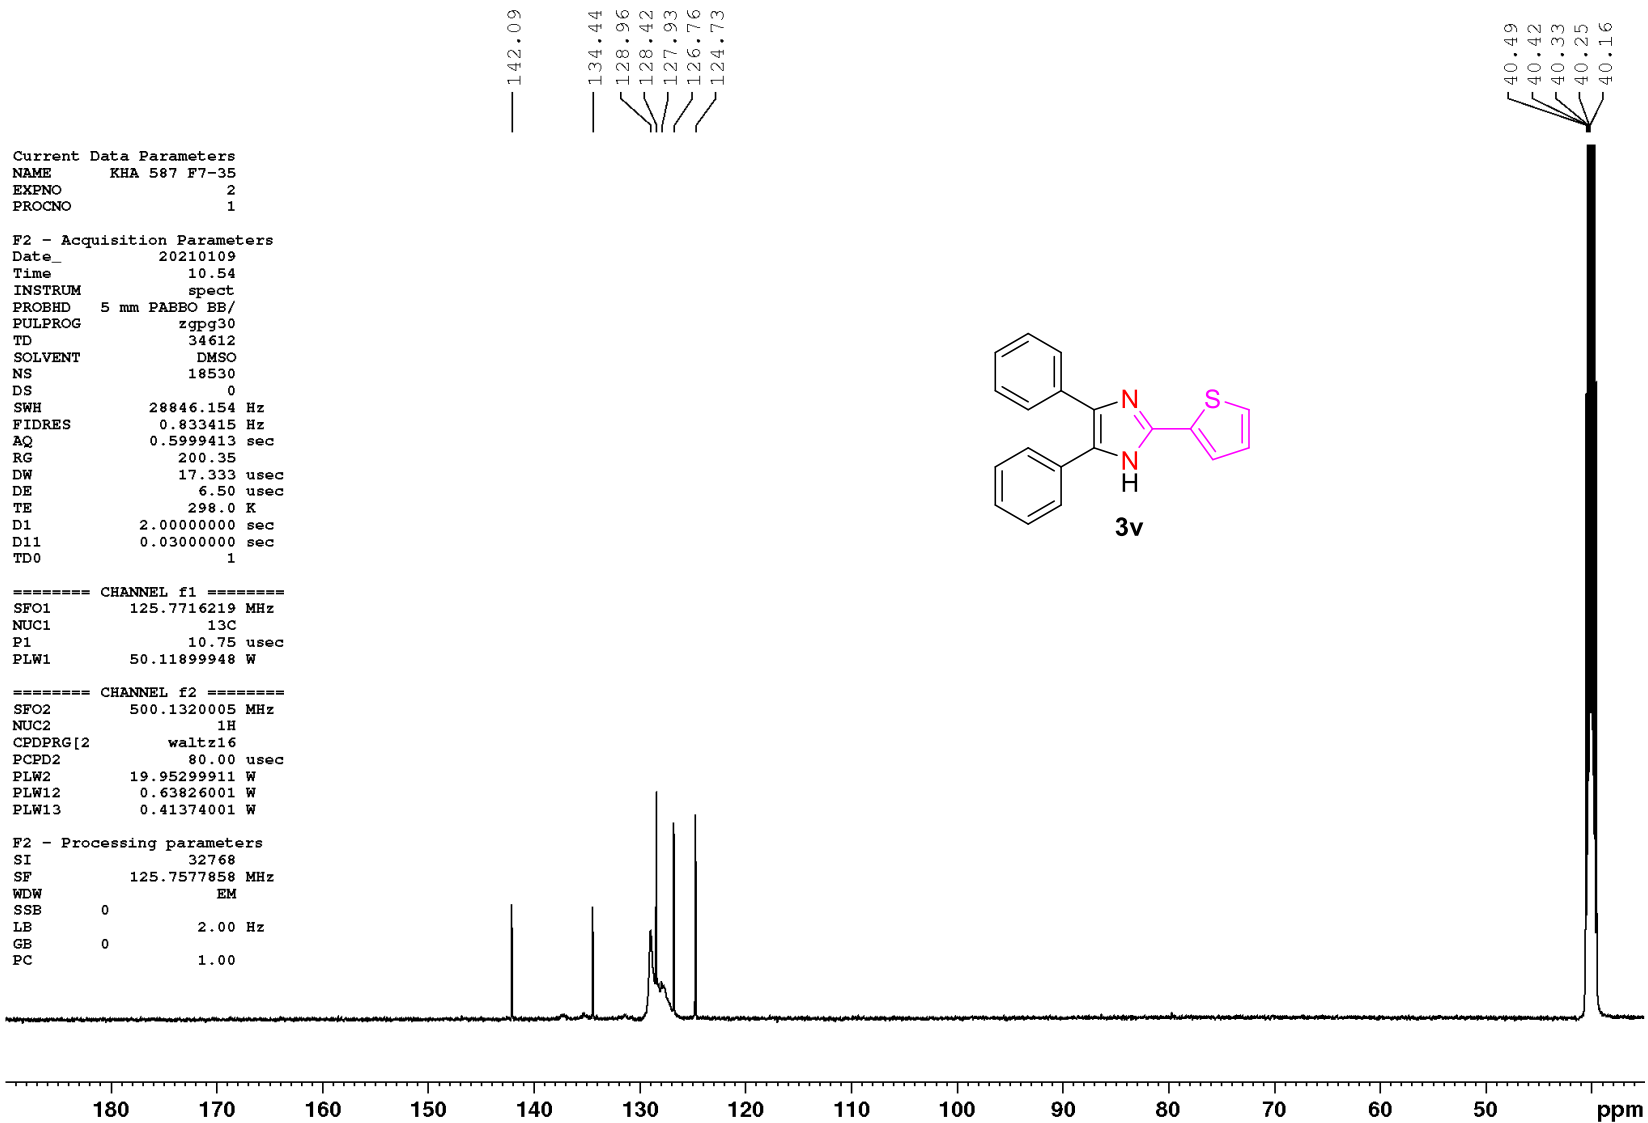

Figure S49. <sup>13</sup>C NMR spectrum of compound **3v** (125 MHz, DMSO-d<sub>6</sub>, 25 °C)

```

Current Data Parameters
NAME      KHA 586 F1-15
EXPNO     1
PROCNO    1

F2 - Acquisition Parameters
Date_     20210107
Time      21.41
INSTRUM   spect
PROBHD    5 mm CPPBBO BB
PULPROG   zg30
TD        32768
SOLVENT   CDCl3
NS        16
DS        0
SWH       8992.806 Hz
FIDRES    0.274439 Hz
AQ        1.8219008 sec
RG        128
DW        55.600 usec
DE        25.00 usec
TE        298.0 K
D1        2.0000000 sec
TD0       1

===== CHANNEL f1 =====
NUC1      1H
P1        11.90 usec
PL1       0.40 dB
PL1W      16.26515961 W
SFO1      500.2035014 MHz

F2 - Processing parameters
SI        32768
SF        500.2000206 MHz
WDW       EM
SSB       0
LB        0 Hz
GB        0
PC        1.00

```

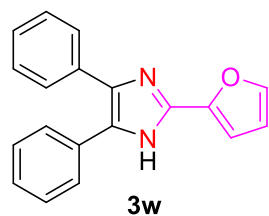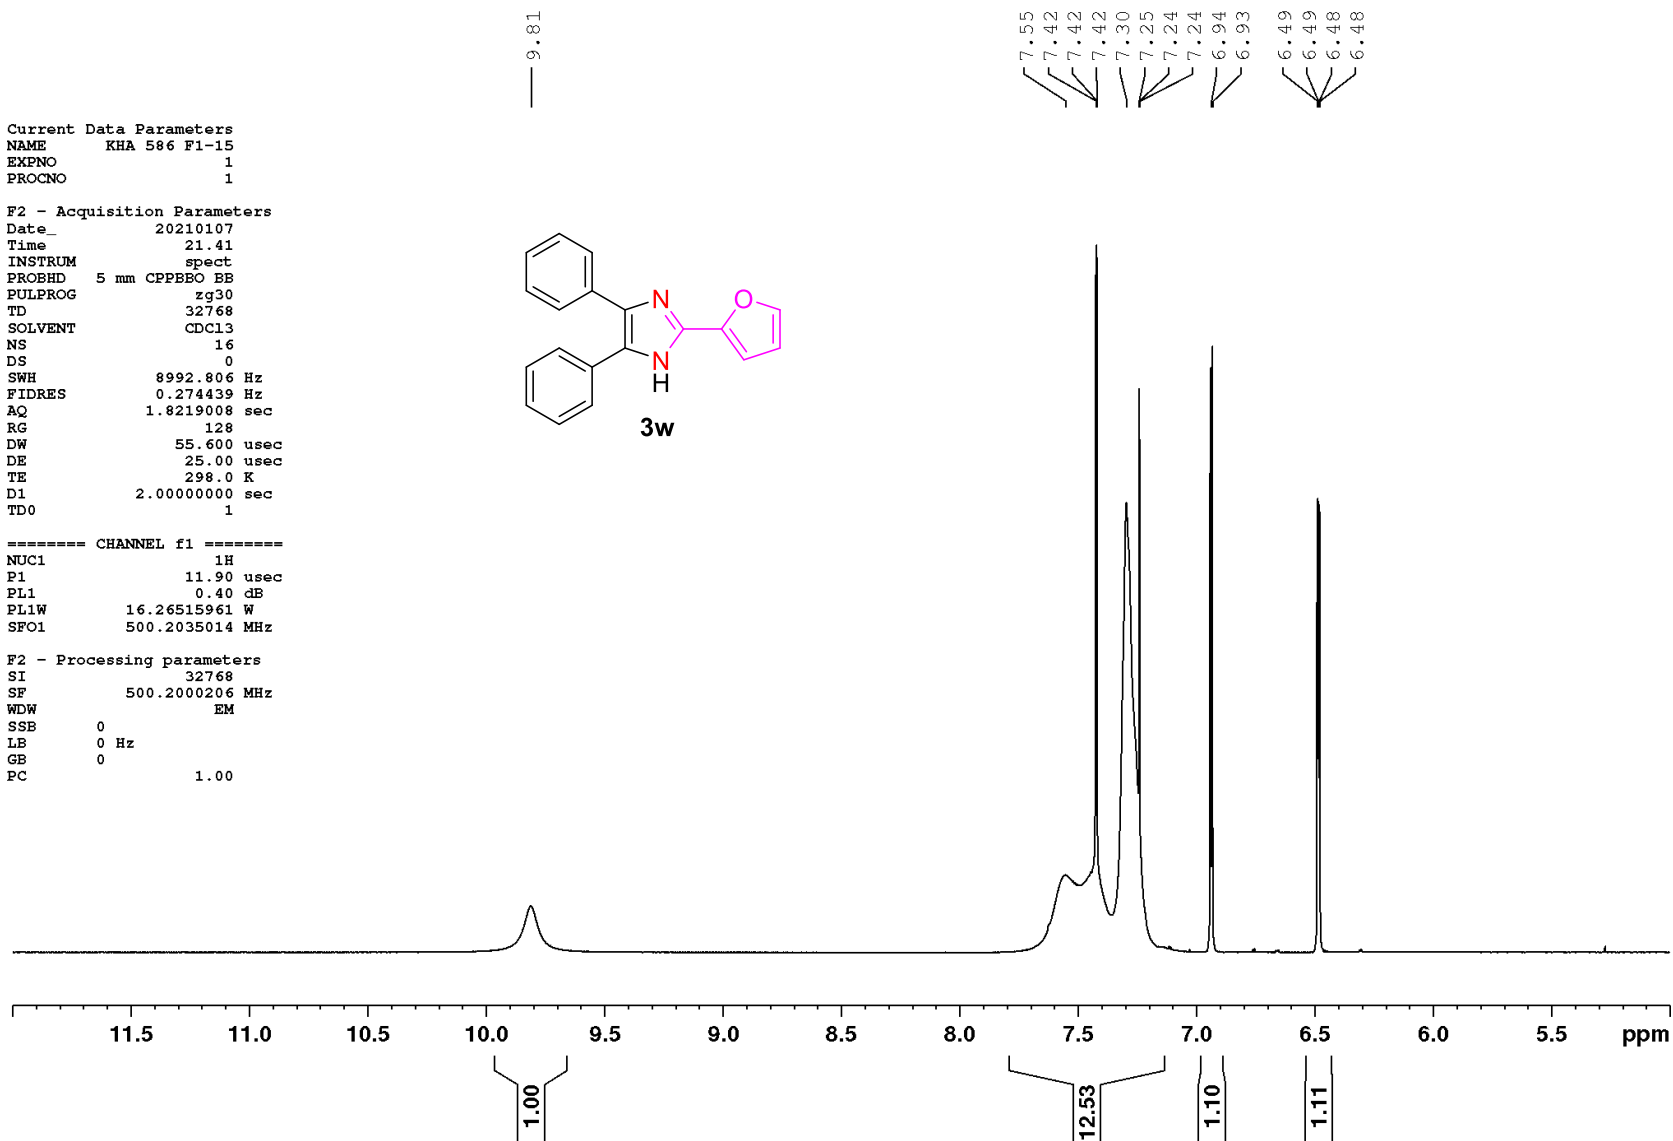

**Figure S50.**  $^1\text{H}$  NMR spectrum of compound **3w** (500 MHz,  $\text{CDCl}_3$ , 25  $^\circ\text{C}$ )

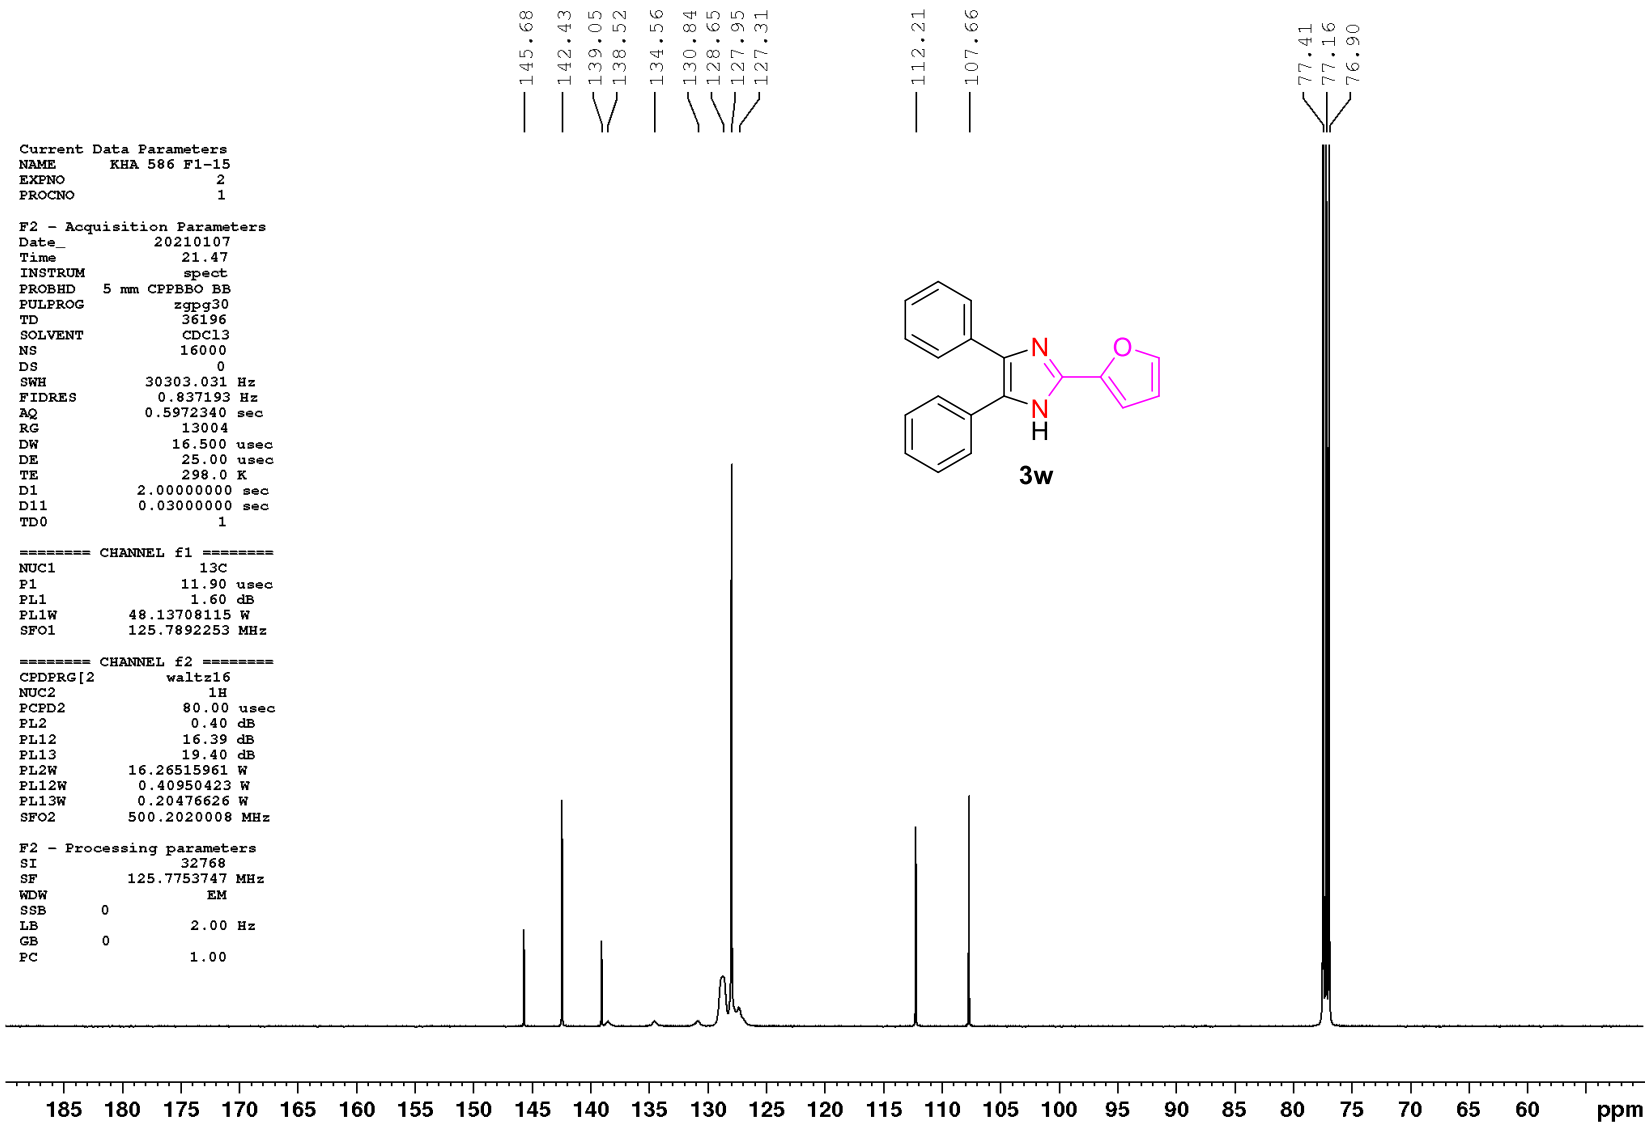

Figure S51. <sup>13</sup>C NMR spectrum of compound **3w** (125 MHz, CDCl<sub>3</sub>, 25 °C)

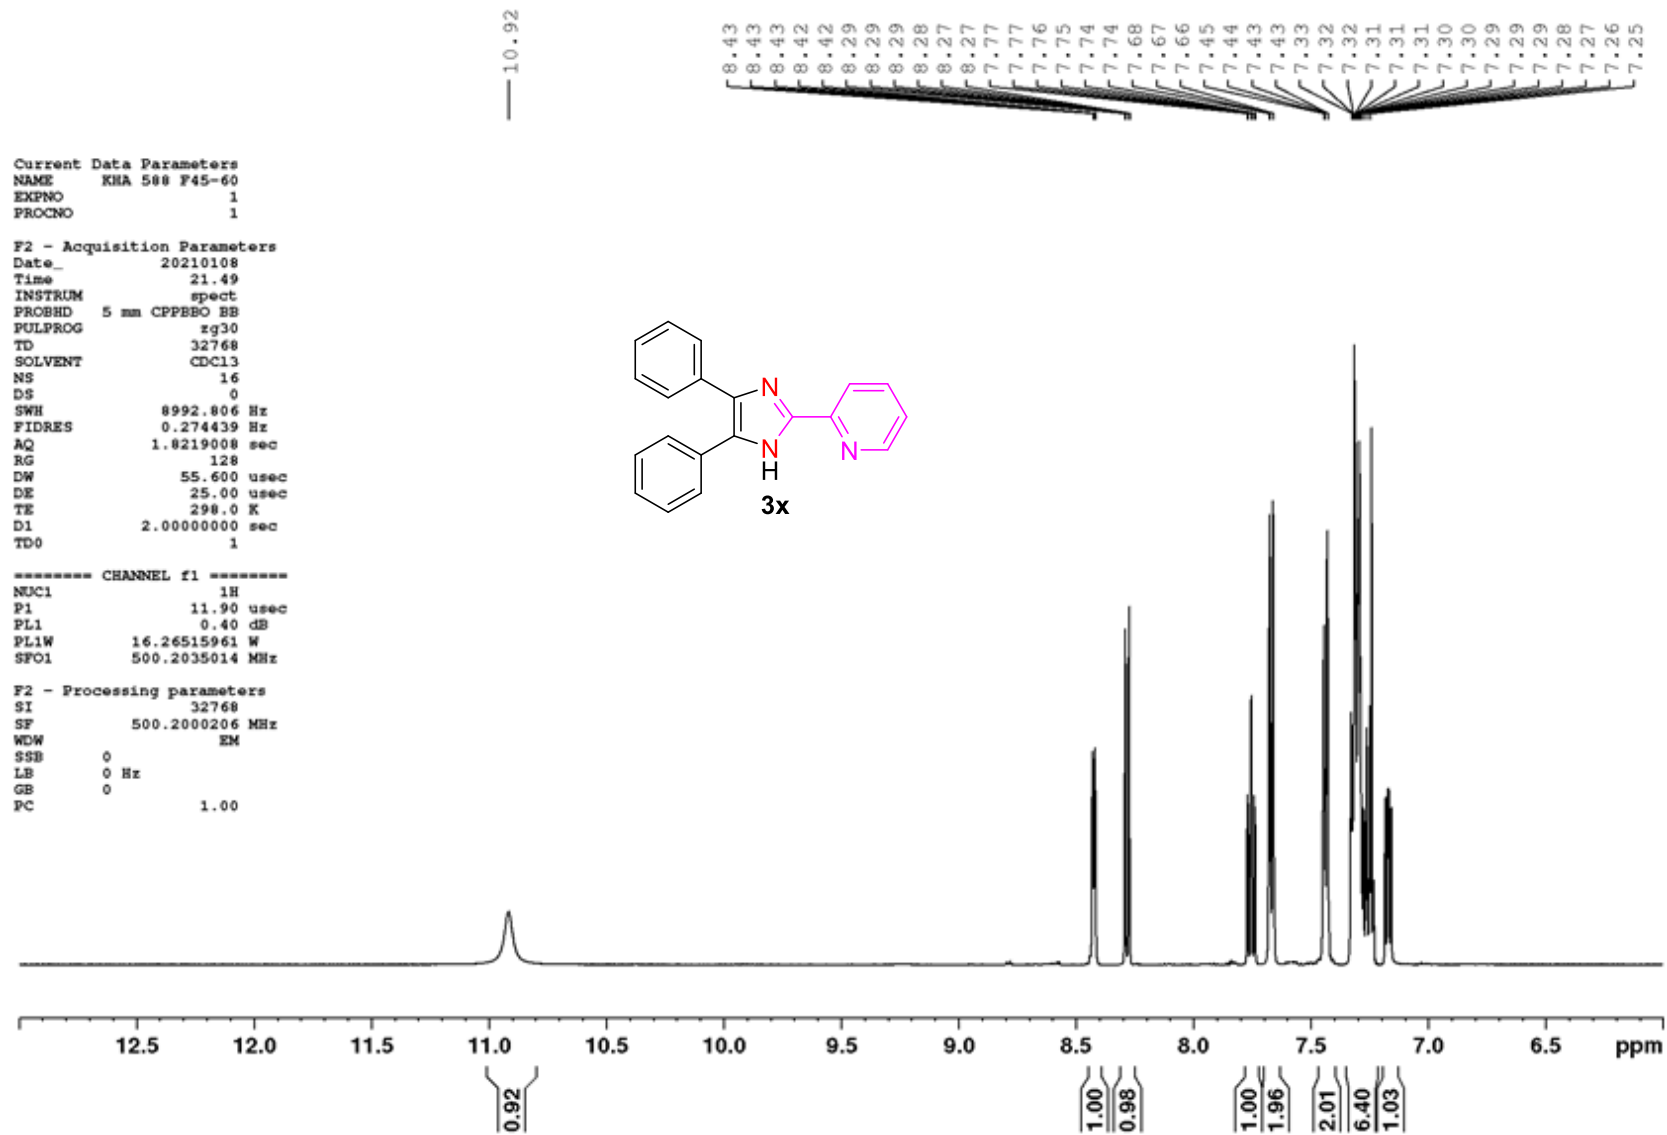

Figure S52. <sup>1</sup>H NMR spectrum of compound **3x** (500 MHz, CDCl<sub>3</sub>, 25 °C)

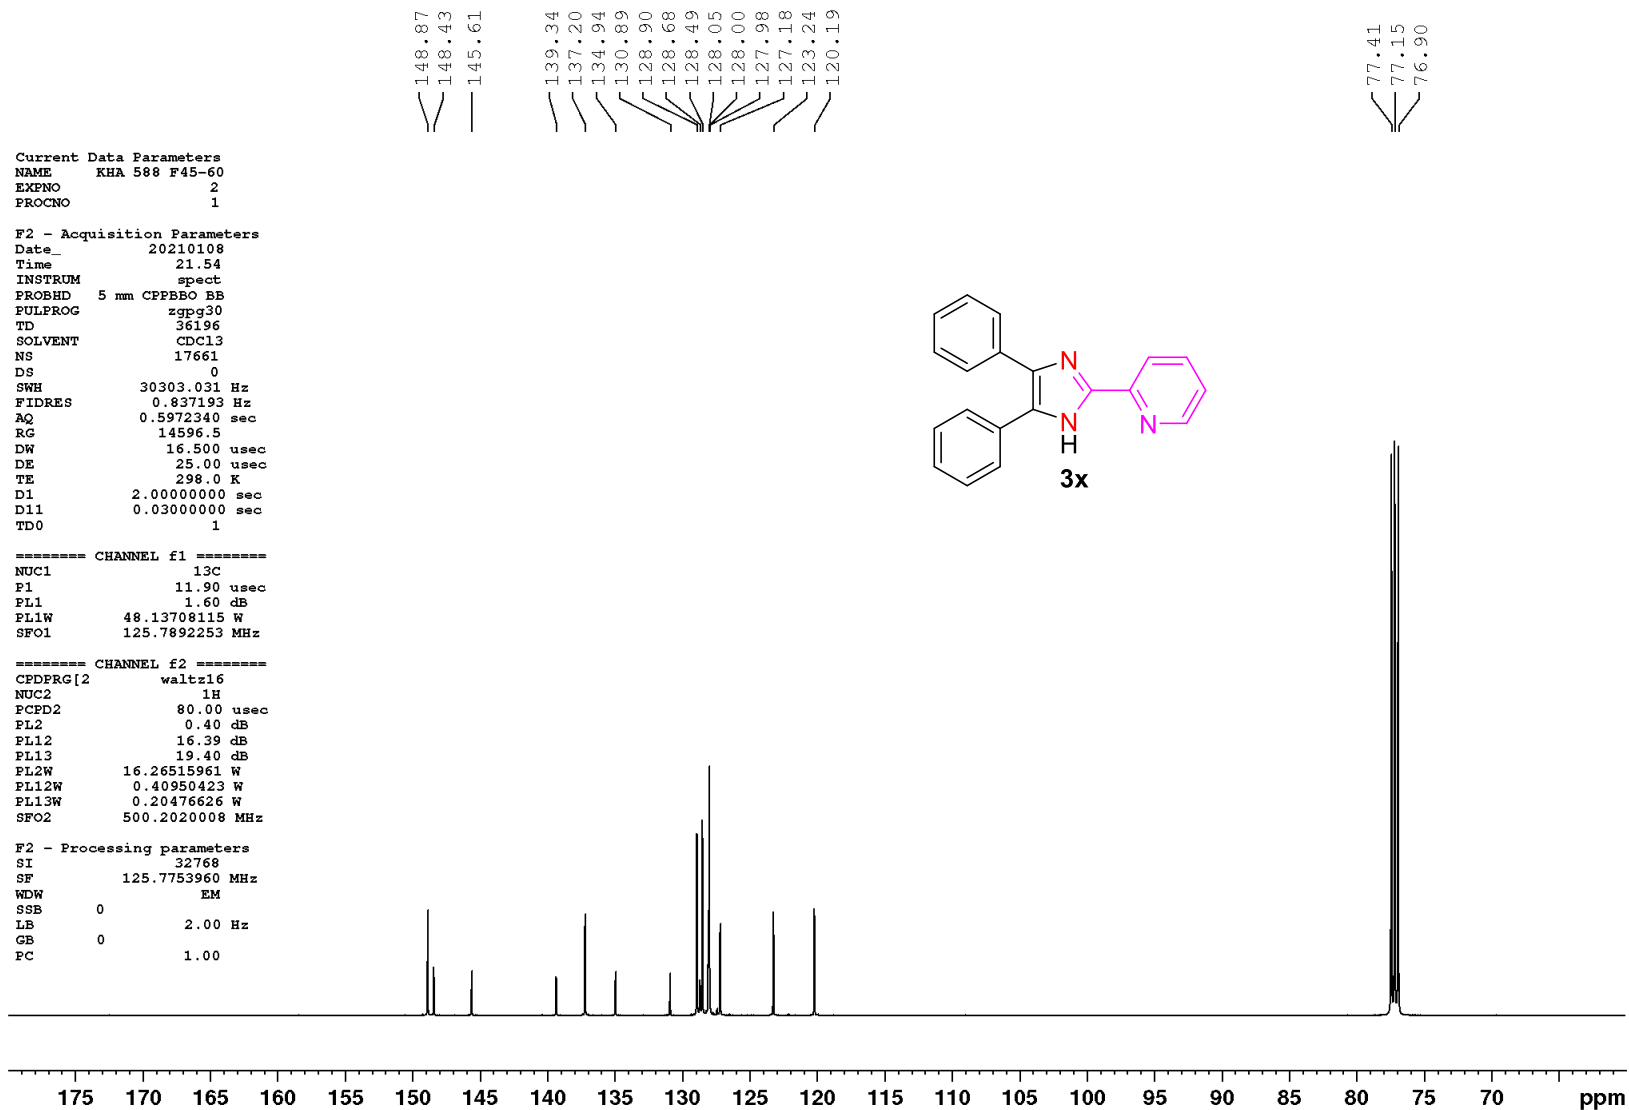

Figure S53. <sup>13</sup>C NMR spectrum of compound **3x** (125 MHz, CDCl<sub>3</sub>, 25 °C)

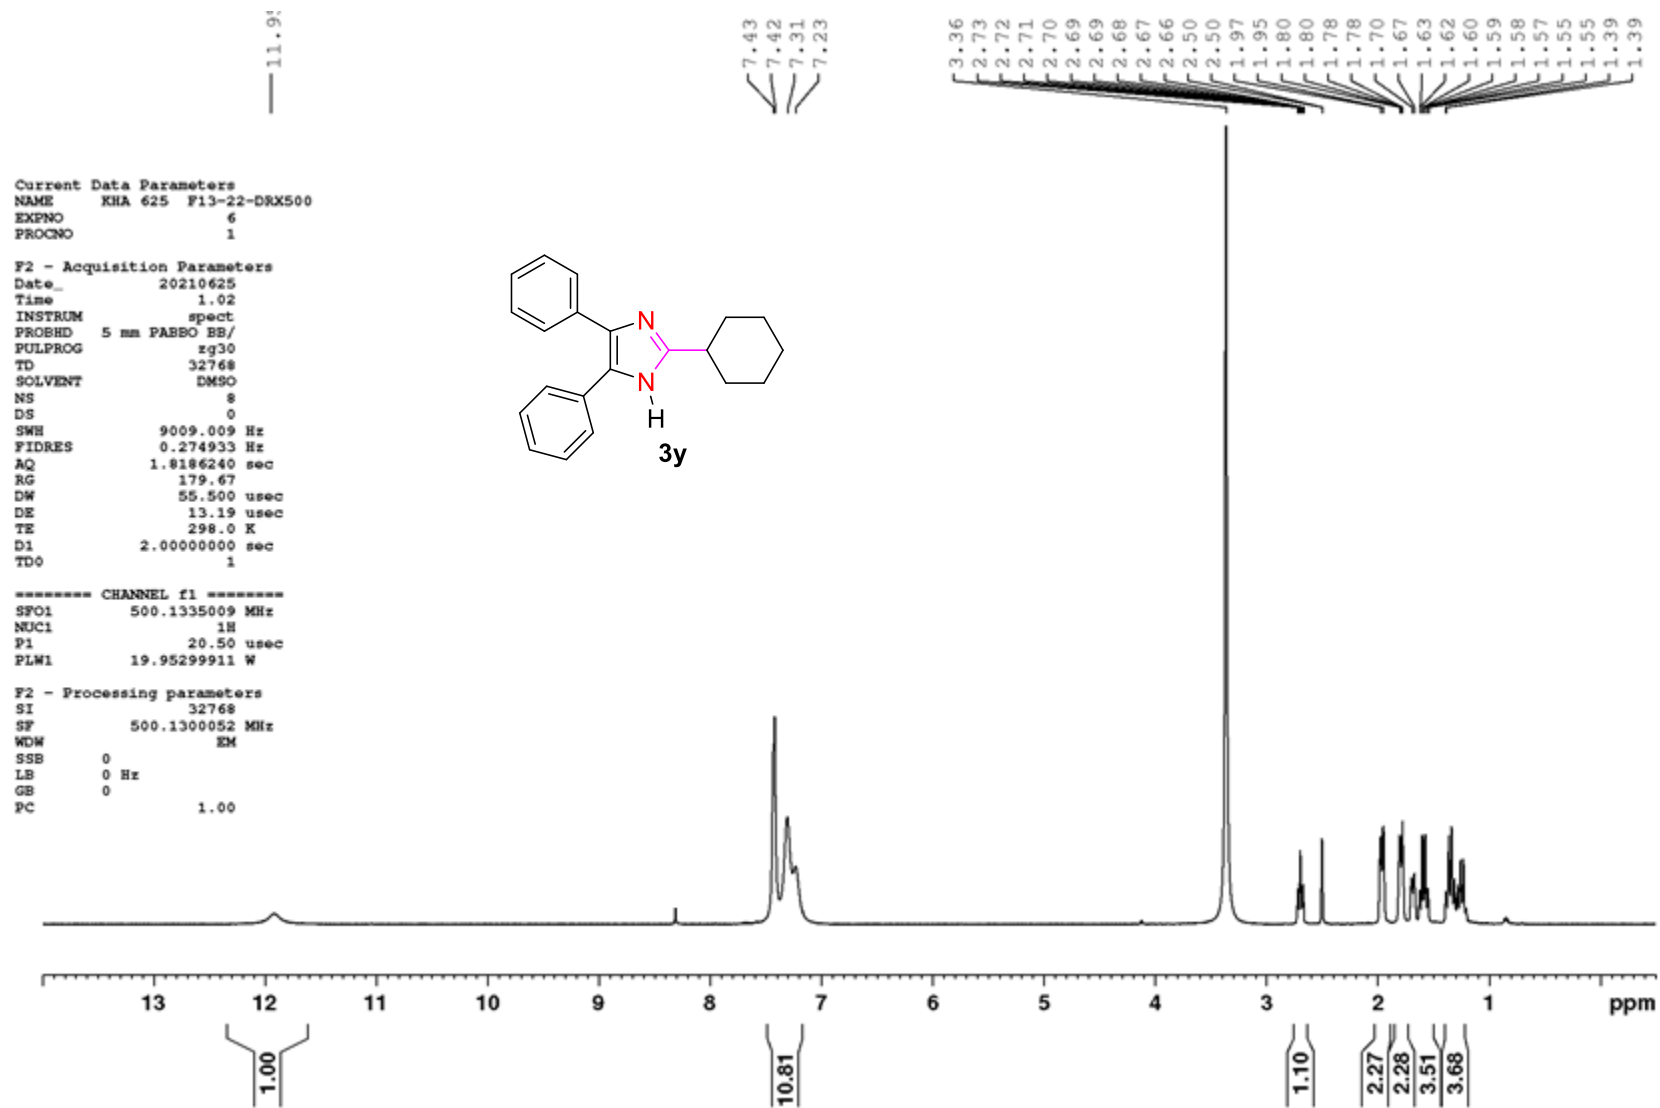

Figure S54.  $^1\text{H}$  NMR spectrum of compound **3y** (500 MHz,  $\text{CDCl}_3$ , 25  $^\circ\text{C}$ )



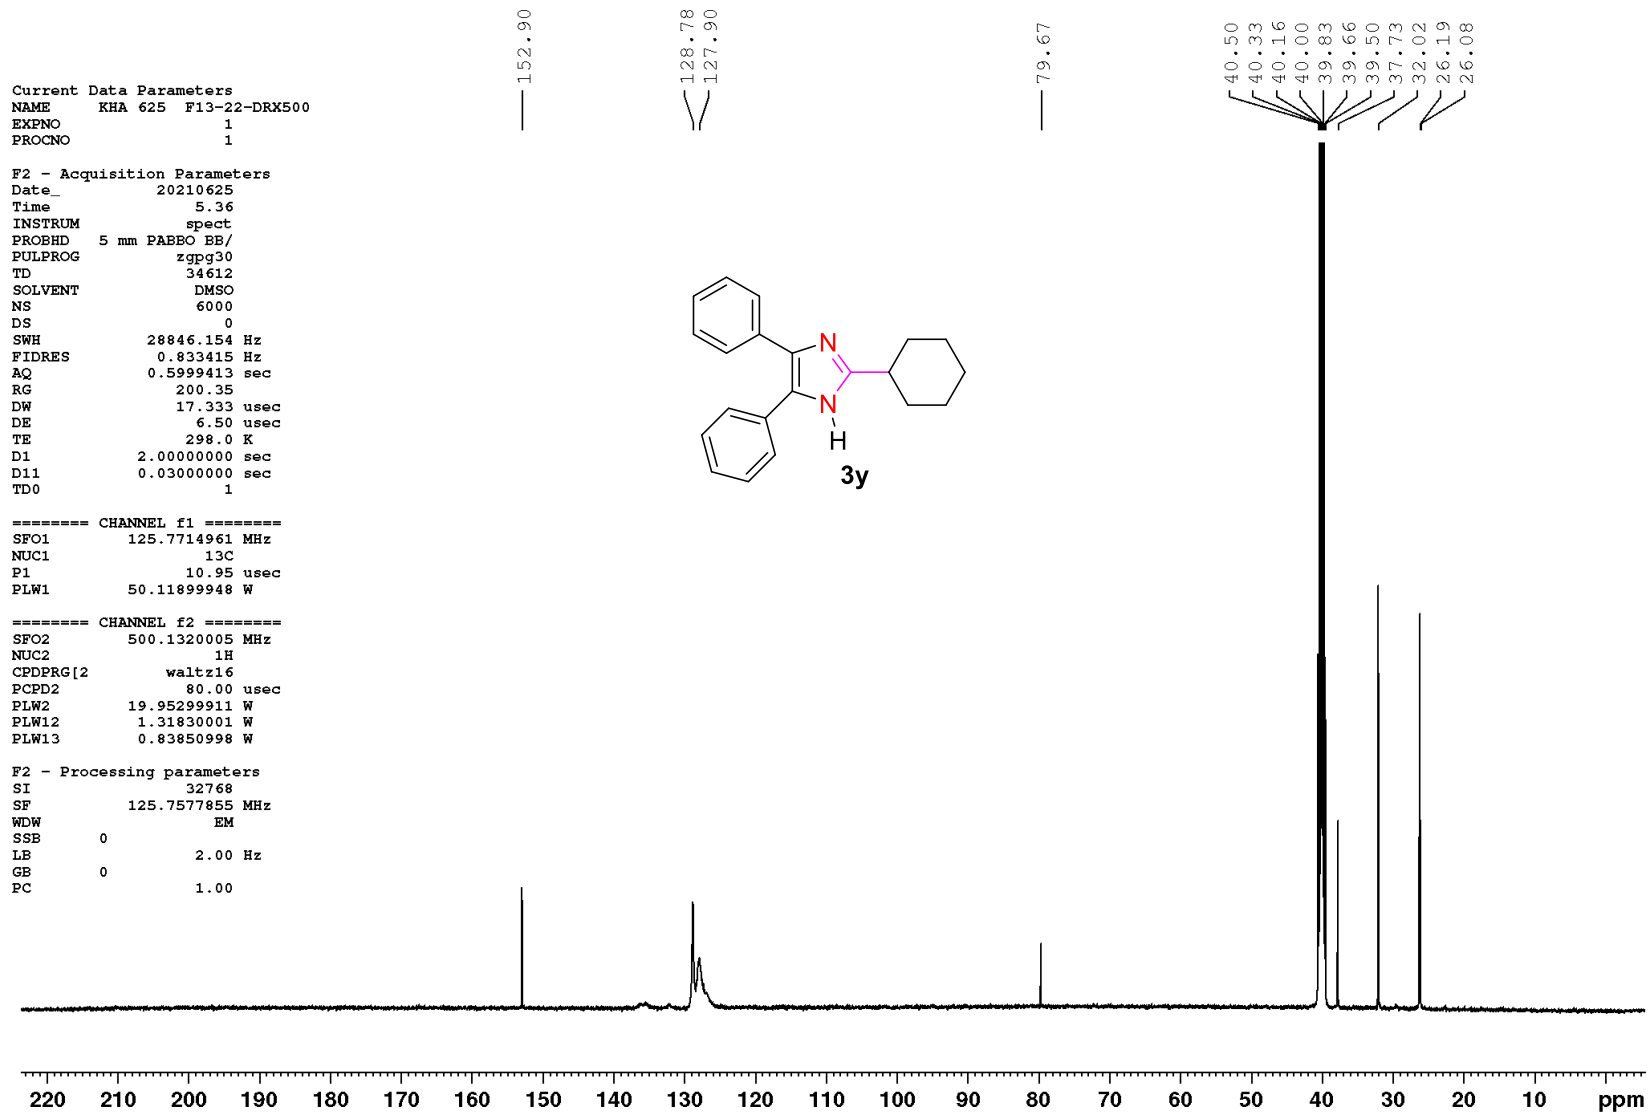

Figure S55. <sup>13</sup>C NMR spectrum of compound **3y** (125 MHz, CDCl<sub>3</sub>, 25 °C)

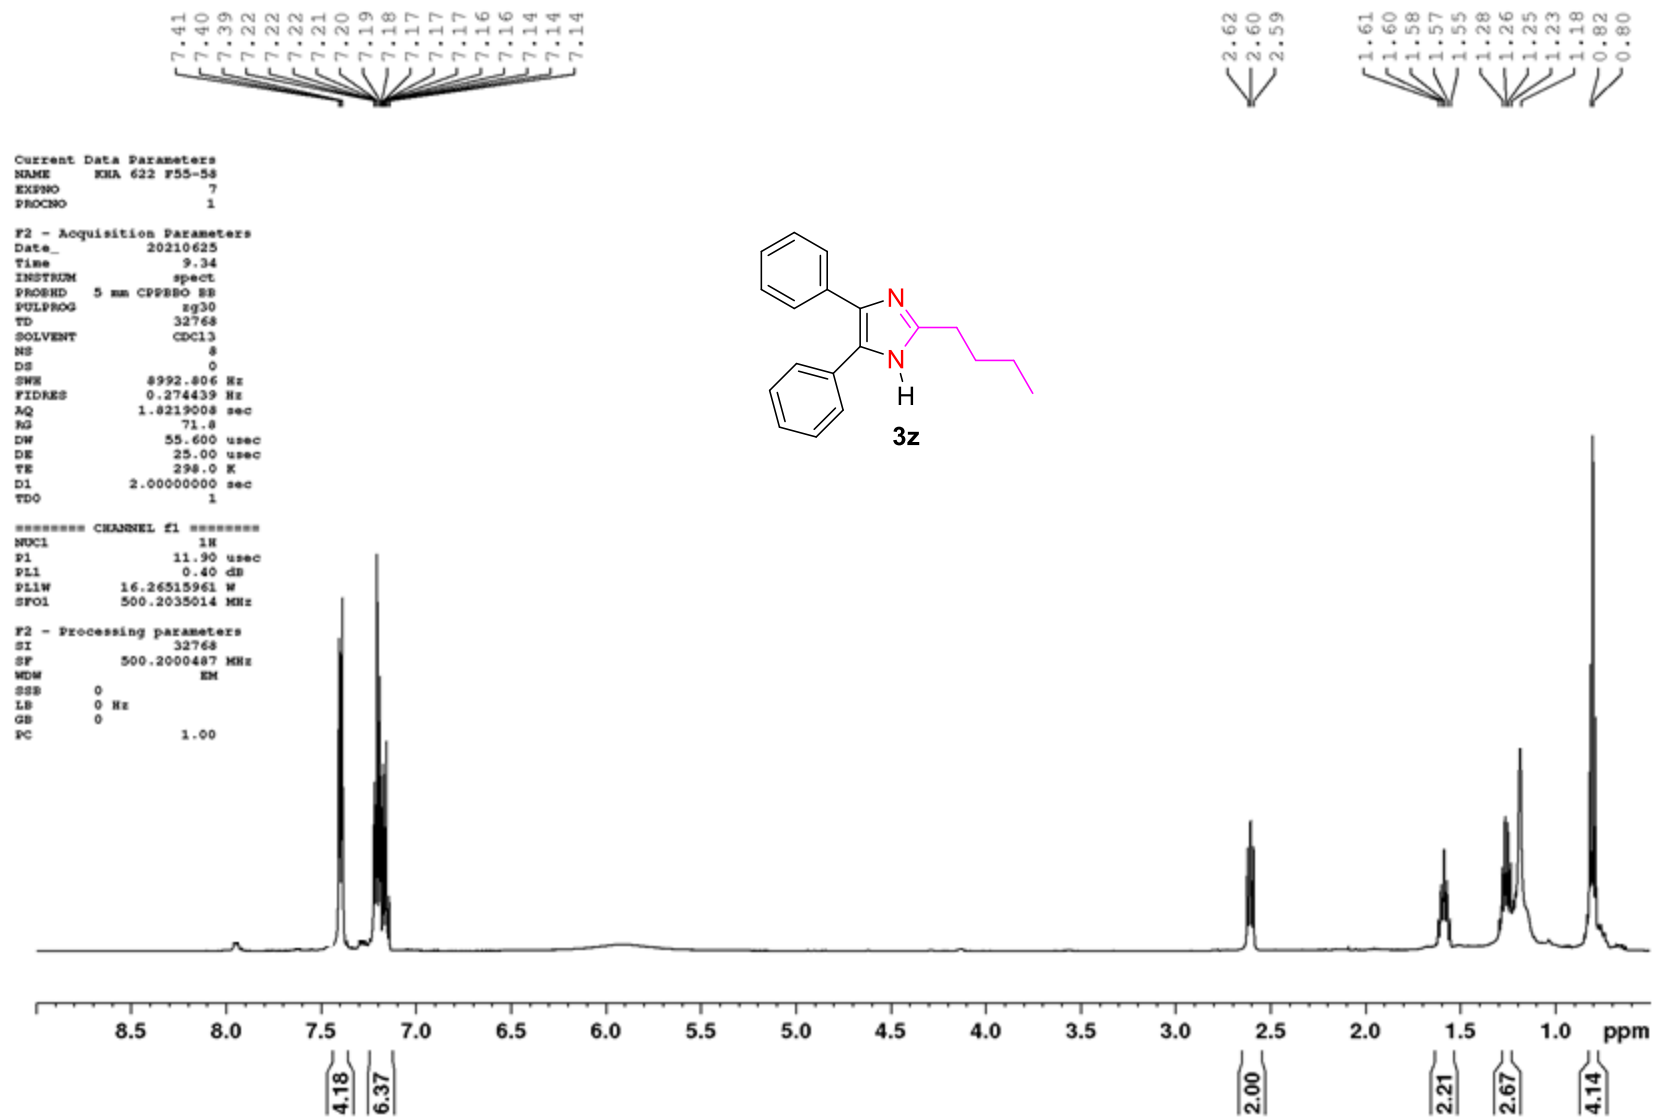

Figure S56. <sup>1</sup>H NMR spectrum of compound **3z** (500 MHz, CDCl<sub>3</sub>, 25 °C)

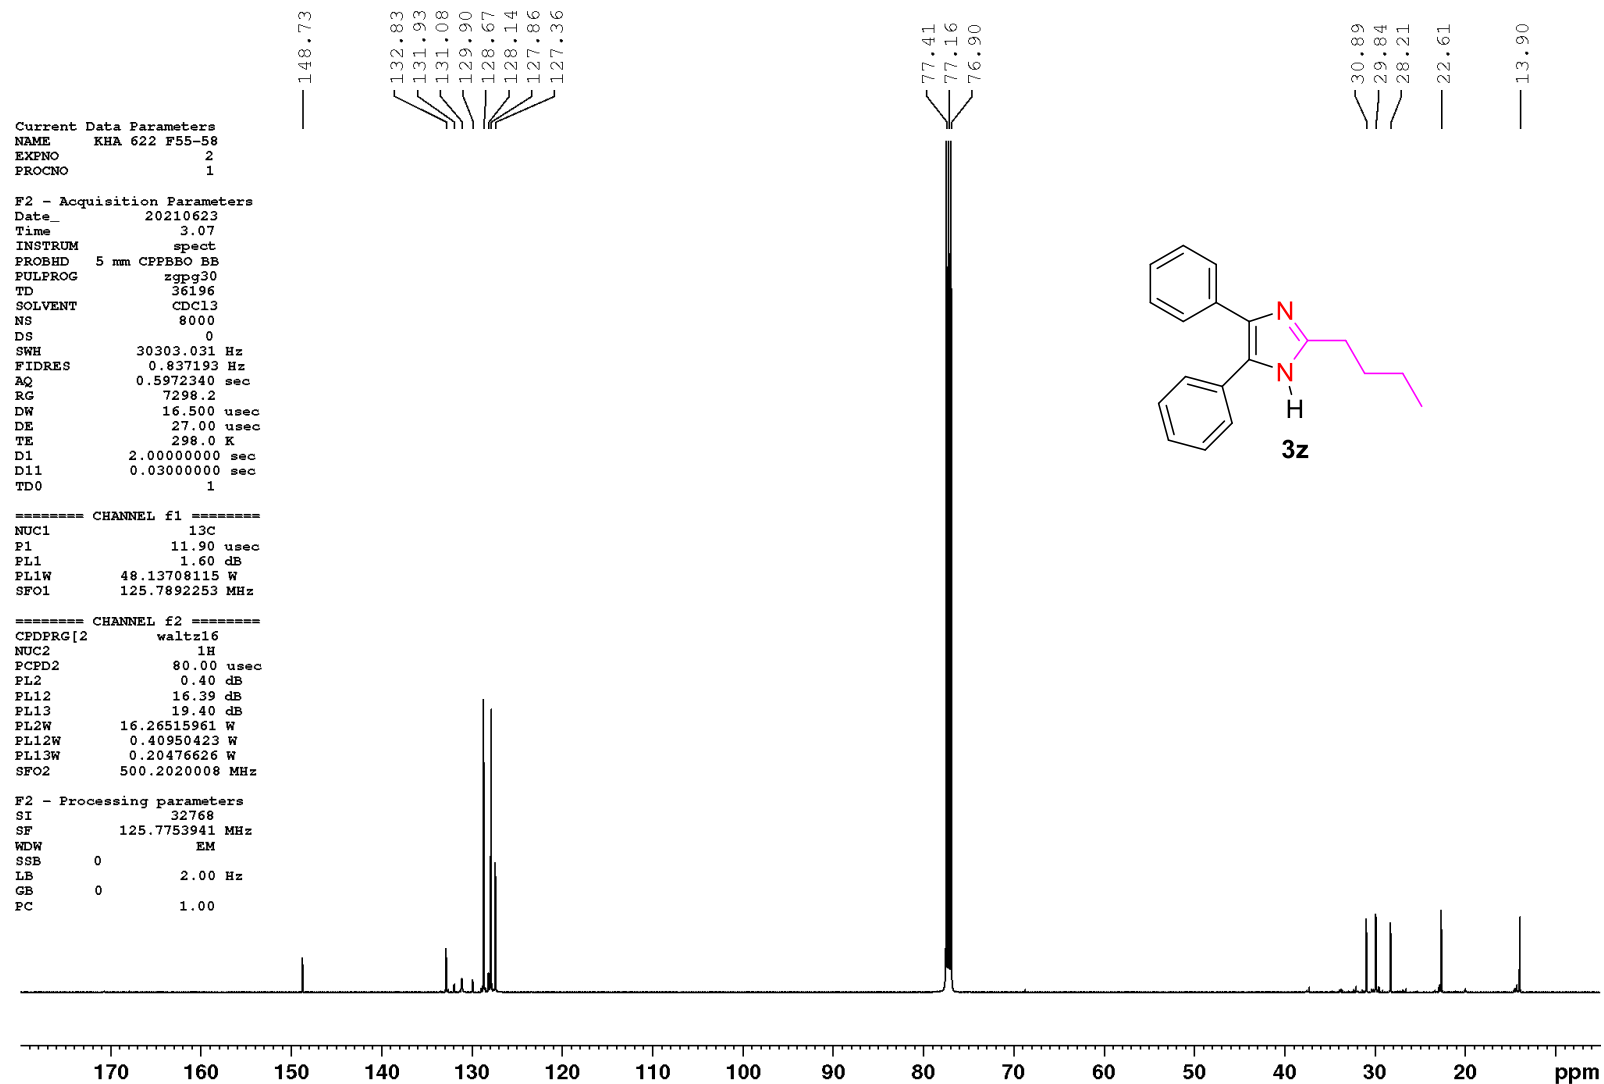

Figure S57. <sup>13</sup>C NMR spectrum of compound **3z** (125 MHz, CDCl<sub>3</sub>, 25 °C)

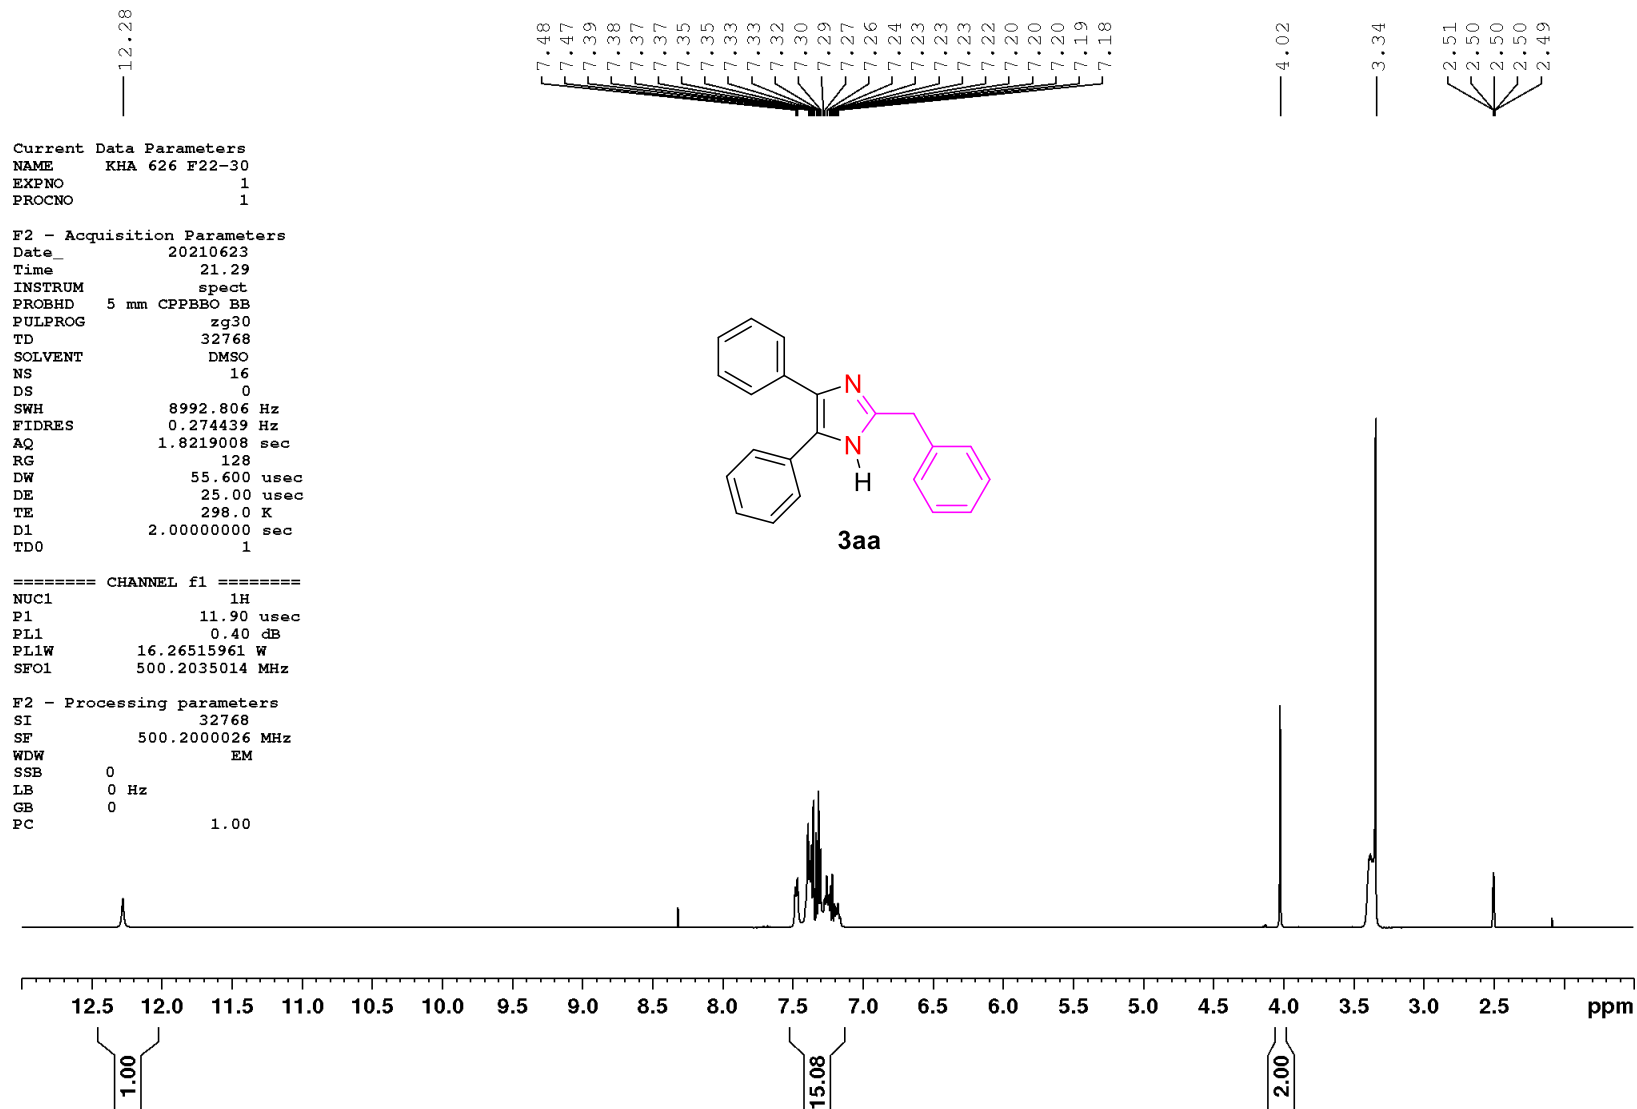

Figure S58.  $^1\text{H}$  NMR spectrum of compound **3aa** (500 MHz,  $\text{CDCl}_3$ , 25  $^\circ\text{C}$ )

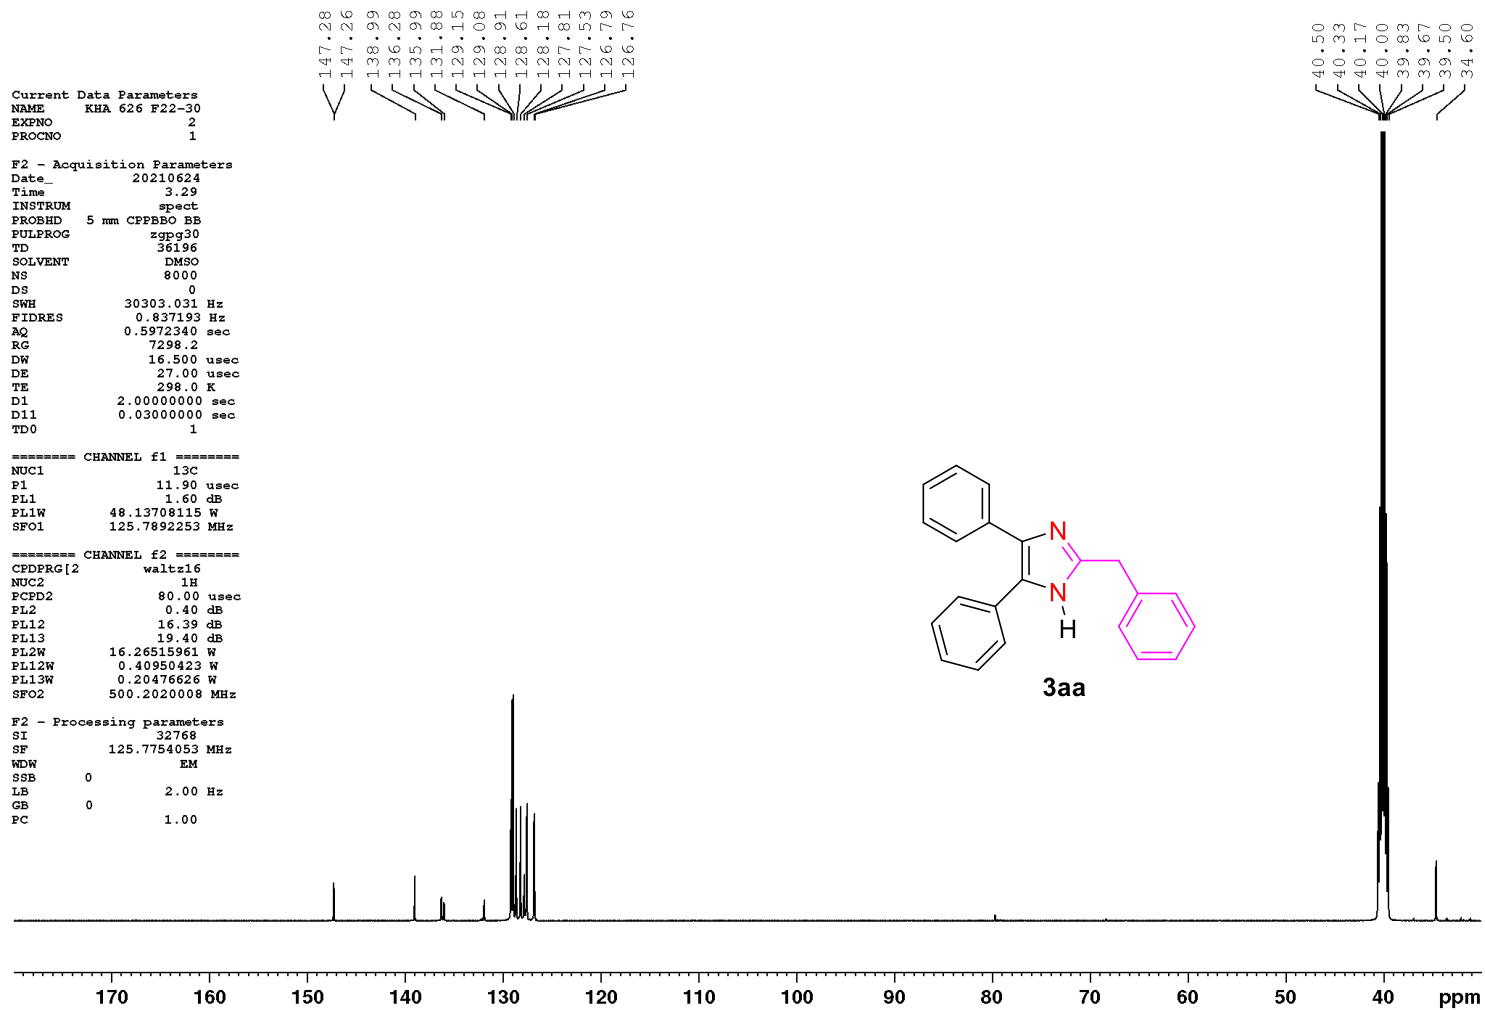

Figure S59.  $^{13}\text{C}$  NMR spectrum of compound **3y** (125 MHz,  $\text{CDCl}_3$ , 25  $^\circ\text{C}$ )

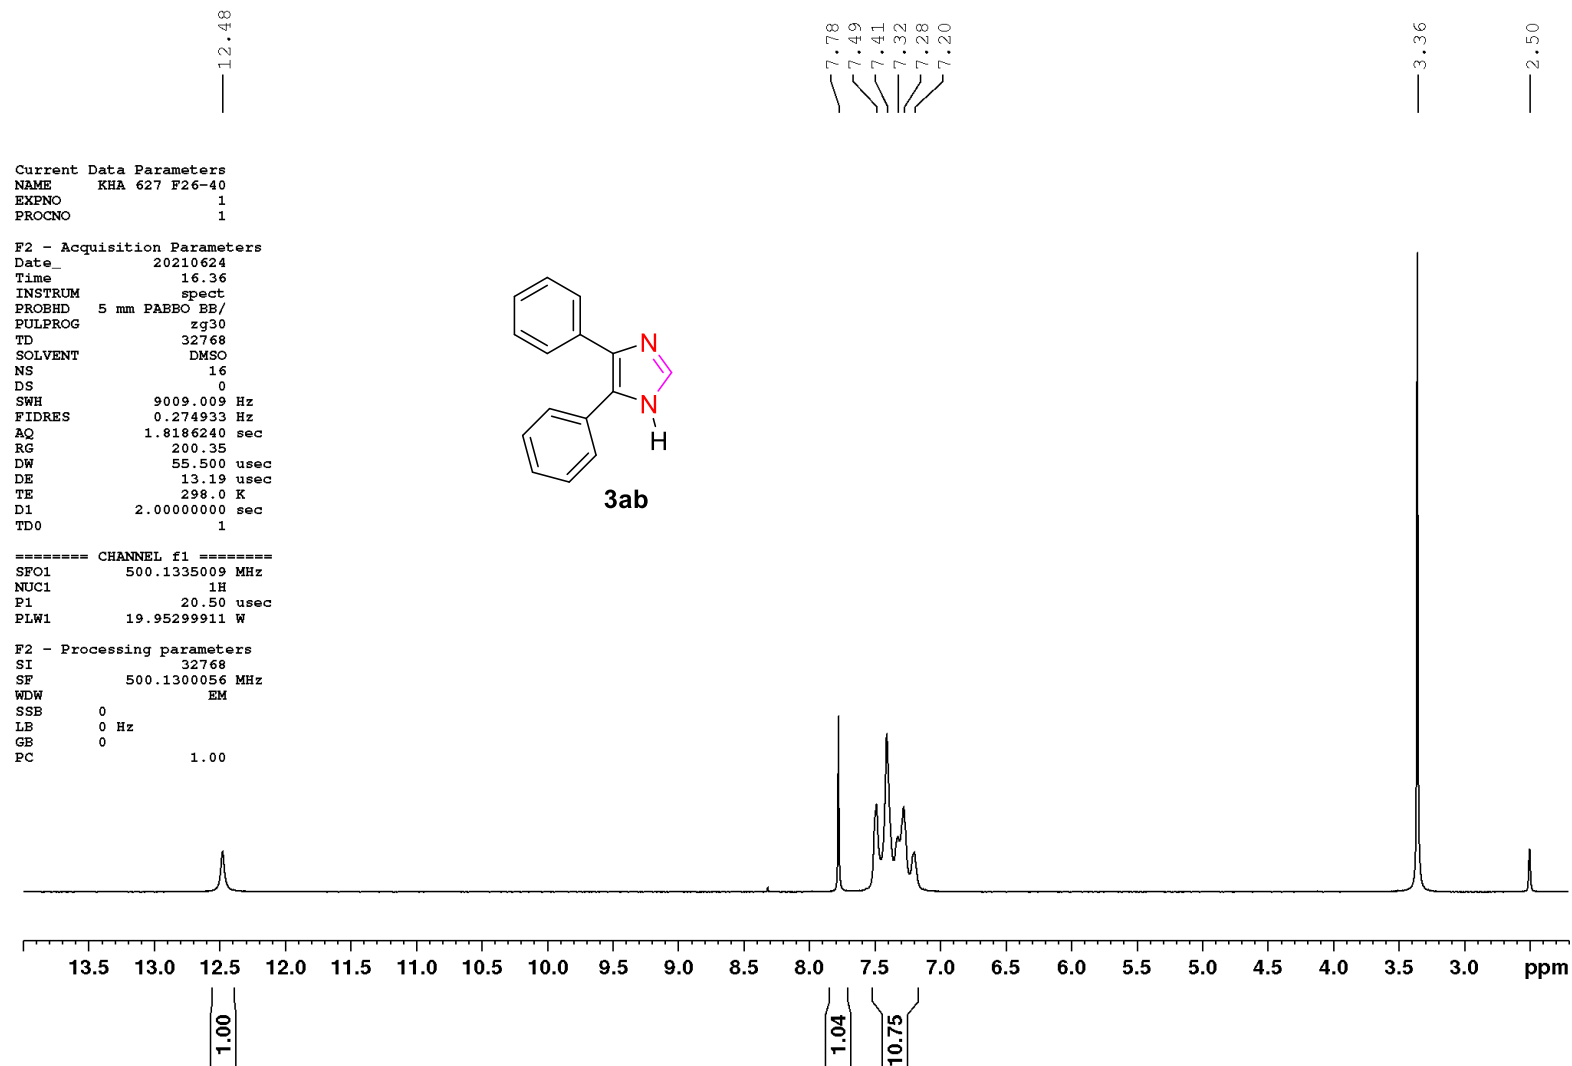

**Figure S60.**  $^1\text{H}$  NMR spectrum of compound **3ab** (500 MHz,  $\text{CDCl}_3$ , 25  $^\circ\text{C}$ )

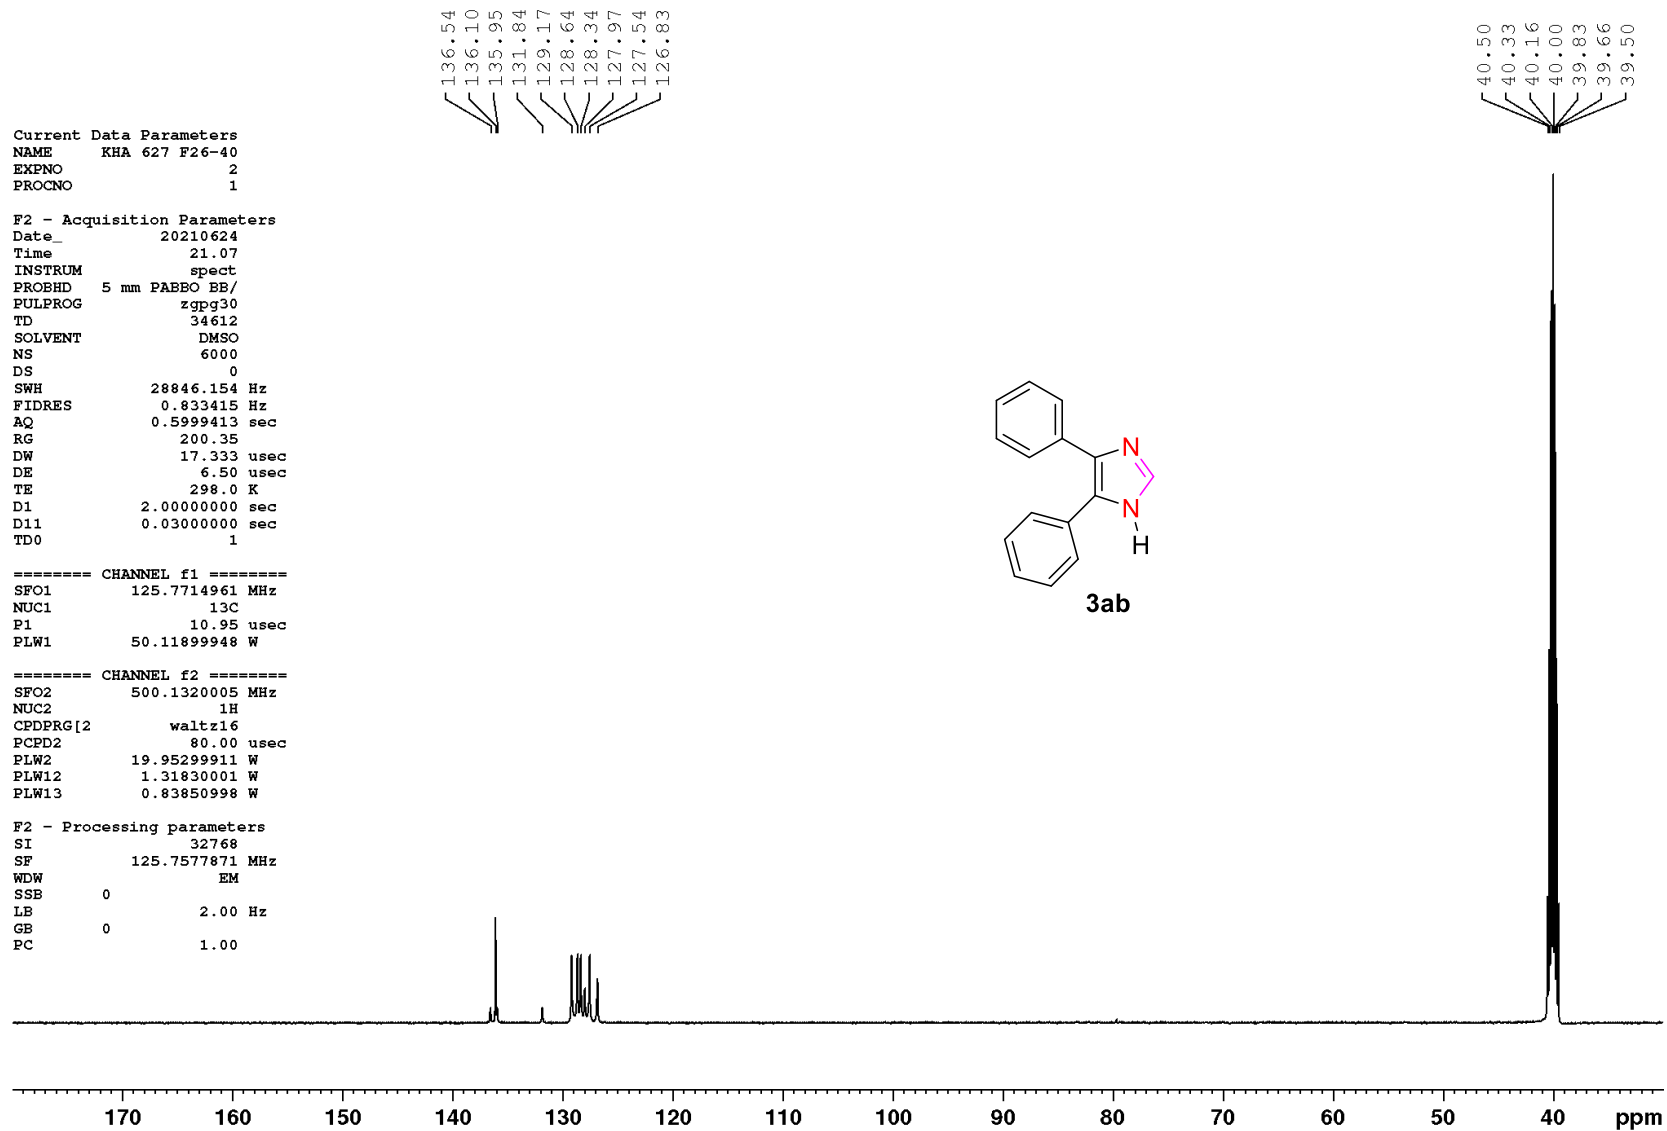

Figure S61. <sup>13</sup>C NMR spectrum of compound **3ab** (125 MHz, CDCl<sub>3</sub>, 25 °C)

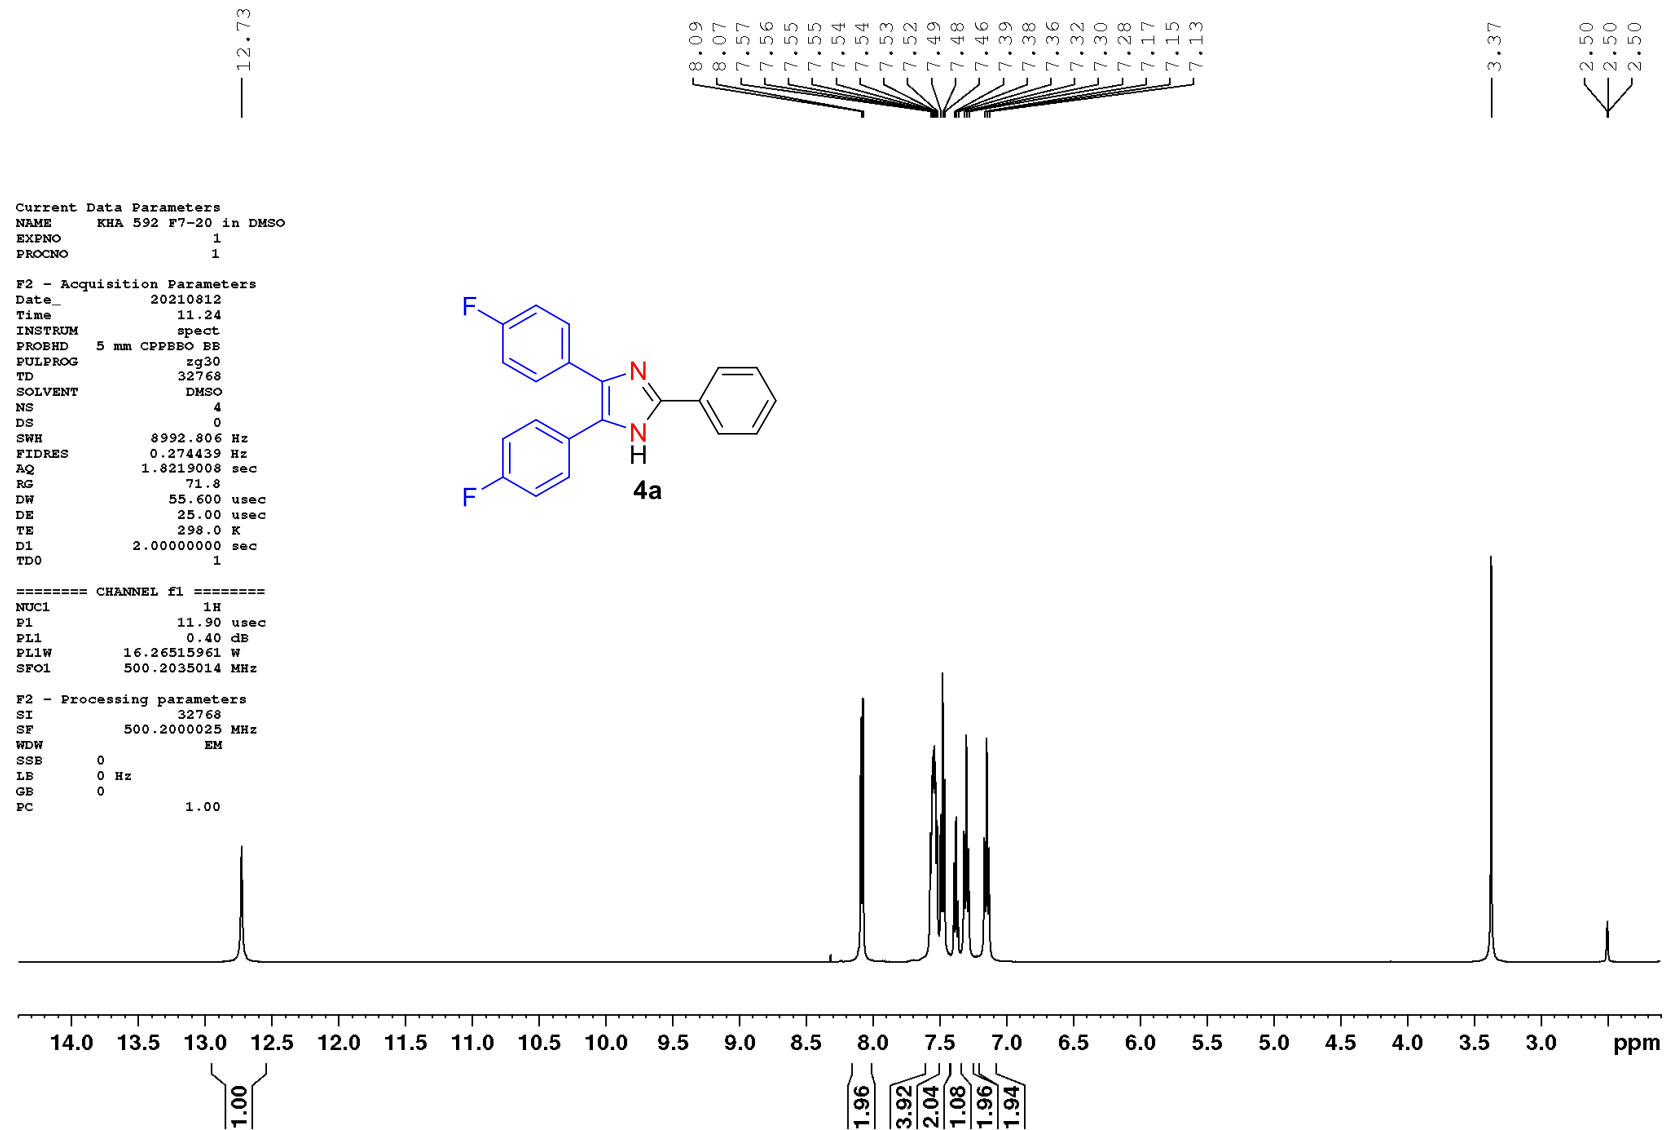

Figure S62. <sup>1</sup>H NMR spectrum of compound **4a** (500 MHz, DMSO-d<sub>6</sub>, 25 °C)



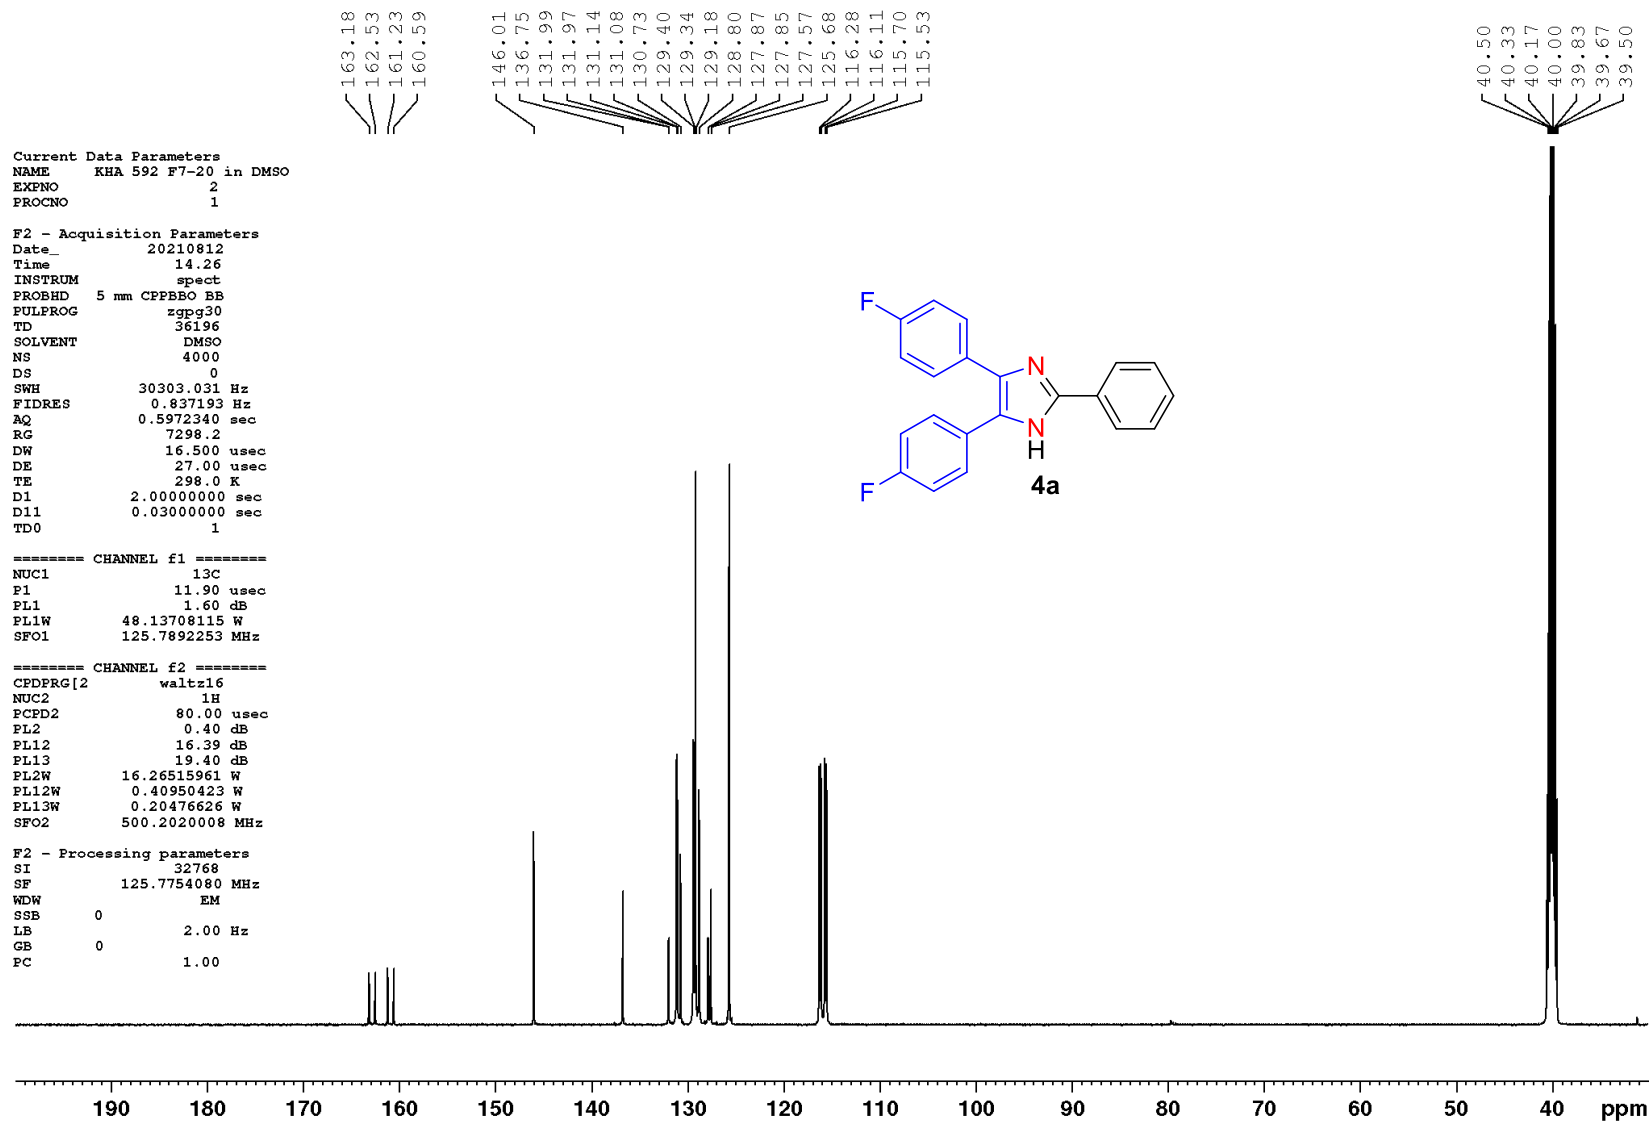

Figure S63.  $^{13}\text{C}$  NMR spectrum of compound **4a** (125 MHz, DMSO- $d_6$ , 25  $^{\circ}\text{C}$ )

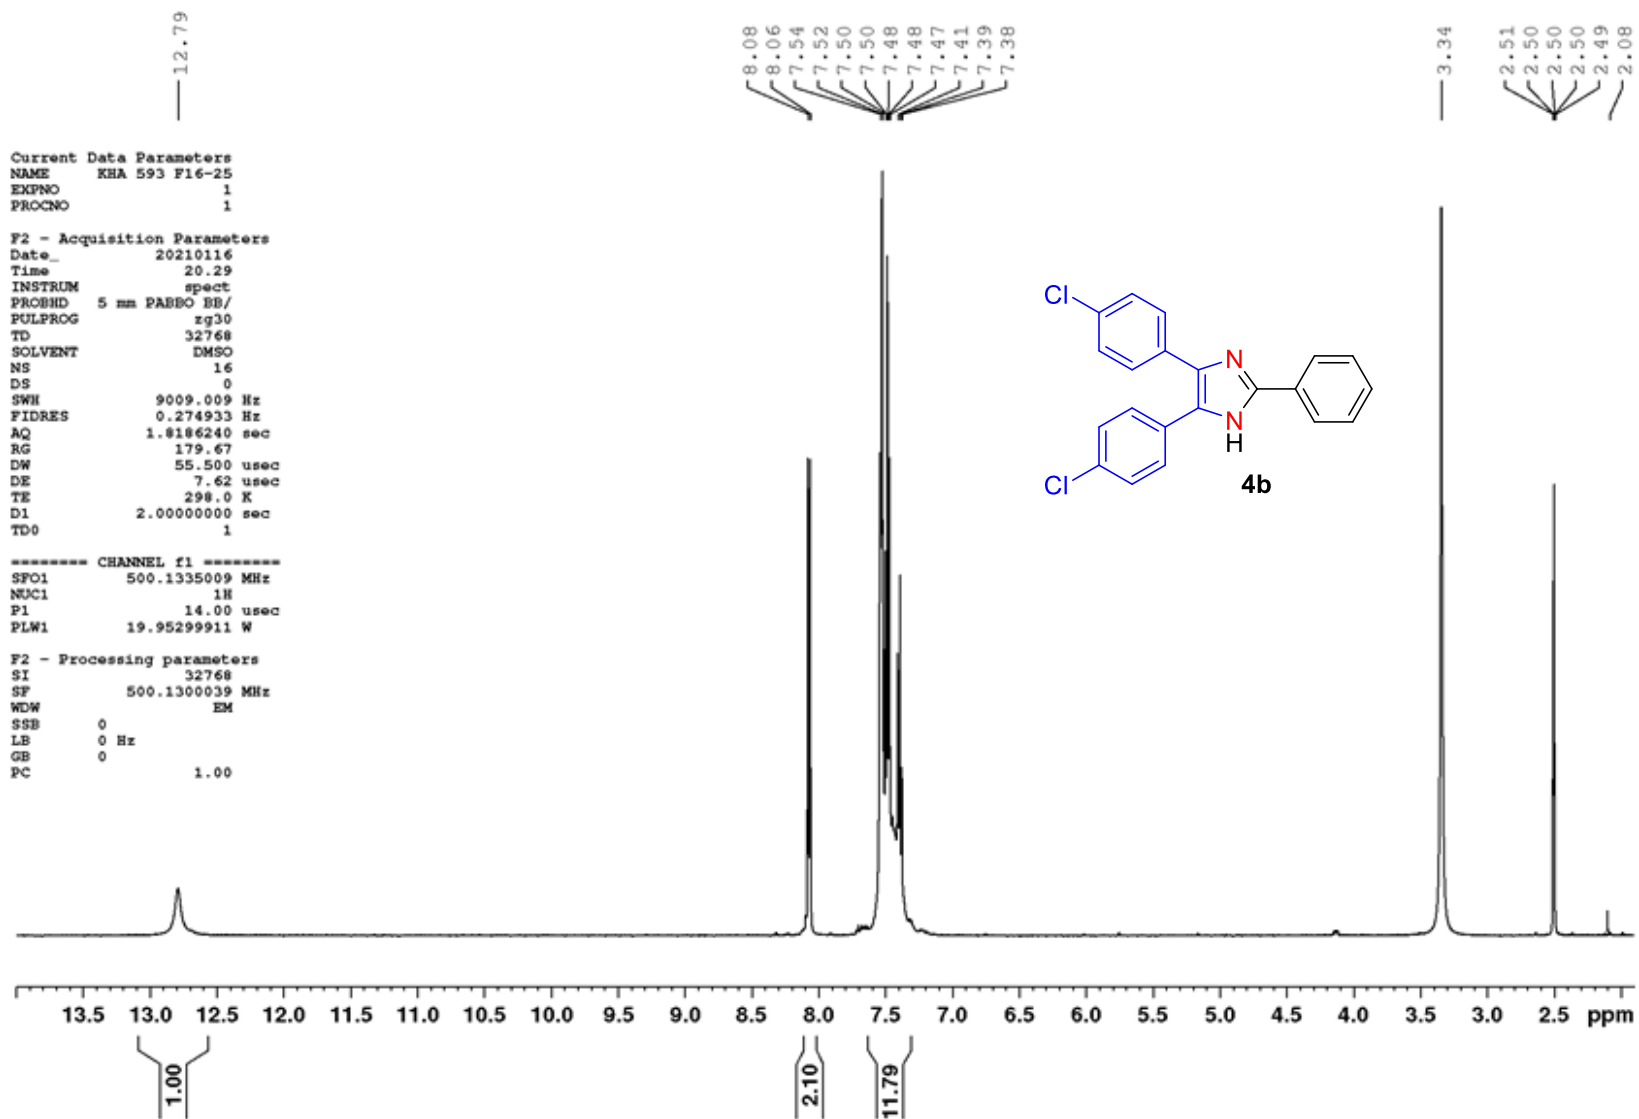

Figure S64.  $^1\text{H}$  NMR spectrum of compound **4b** (500 MHz, DMSO- $d_6$ , 25  $^\circ\text{C}$ )

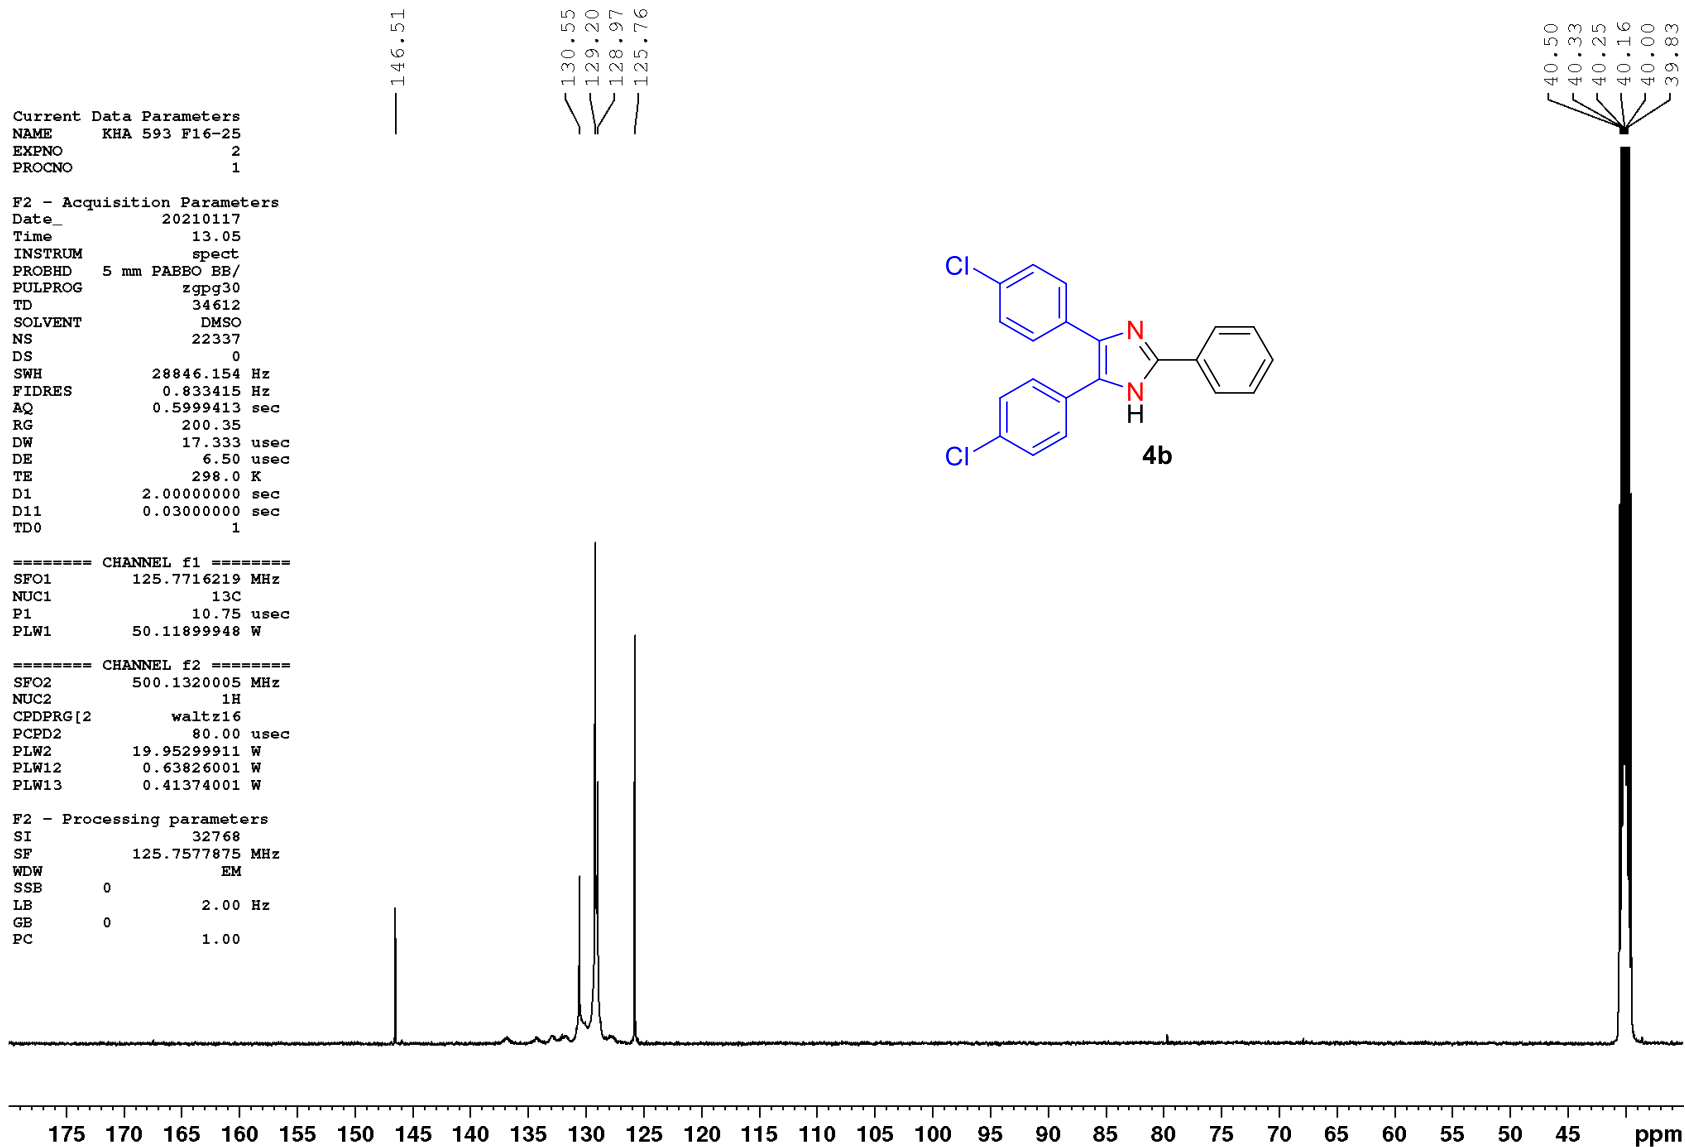

Figure S65. <sup>13</sup>C NMR spectrum of compound **4b** (125 MHz, DMSO-d<sub>6</sub>, 25 °C)

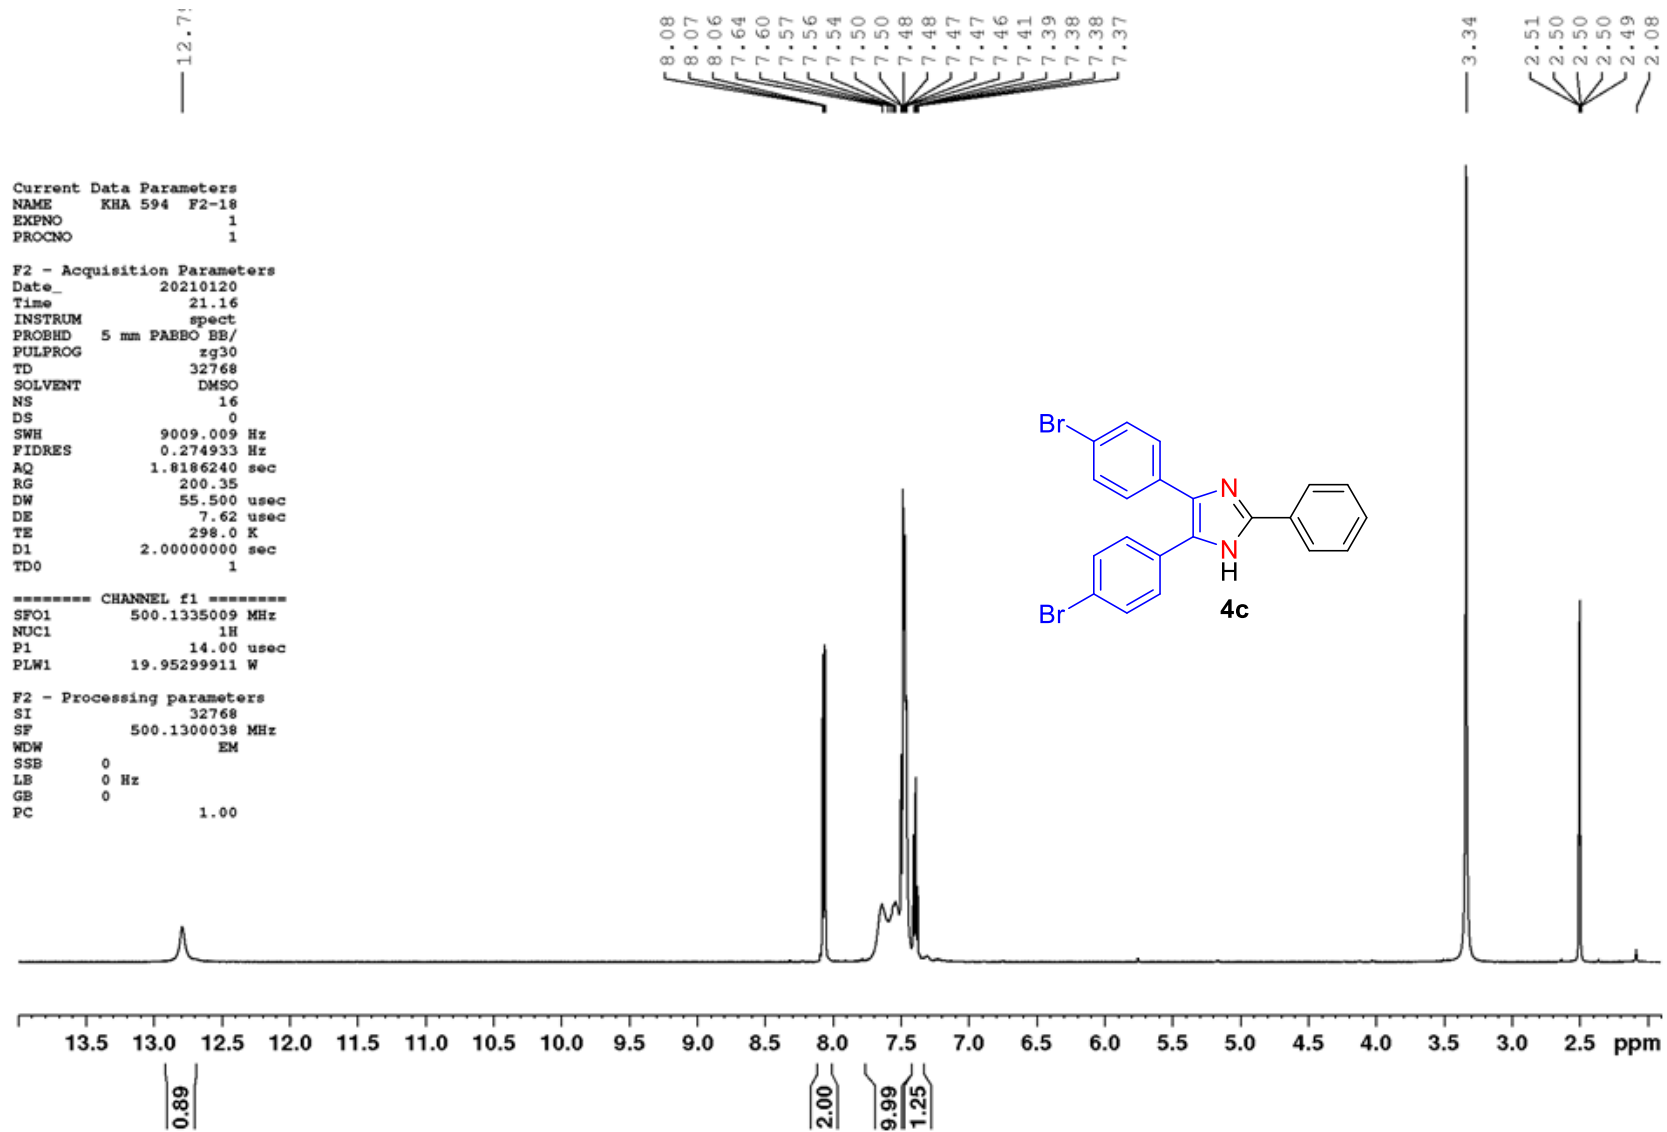

Figure S66. <sup>1</sup>H NMR spectrum of compound **4c** (500 MHz, DMSO-d<sub>6</sub>, 25 °C)

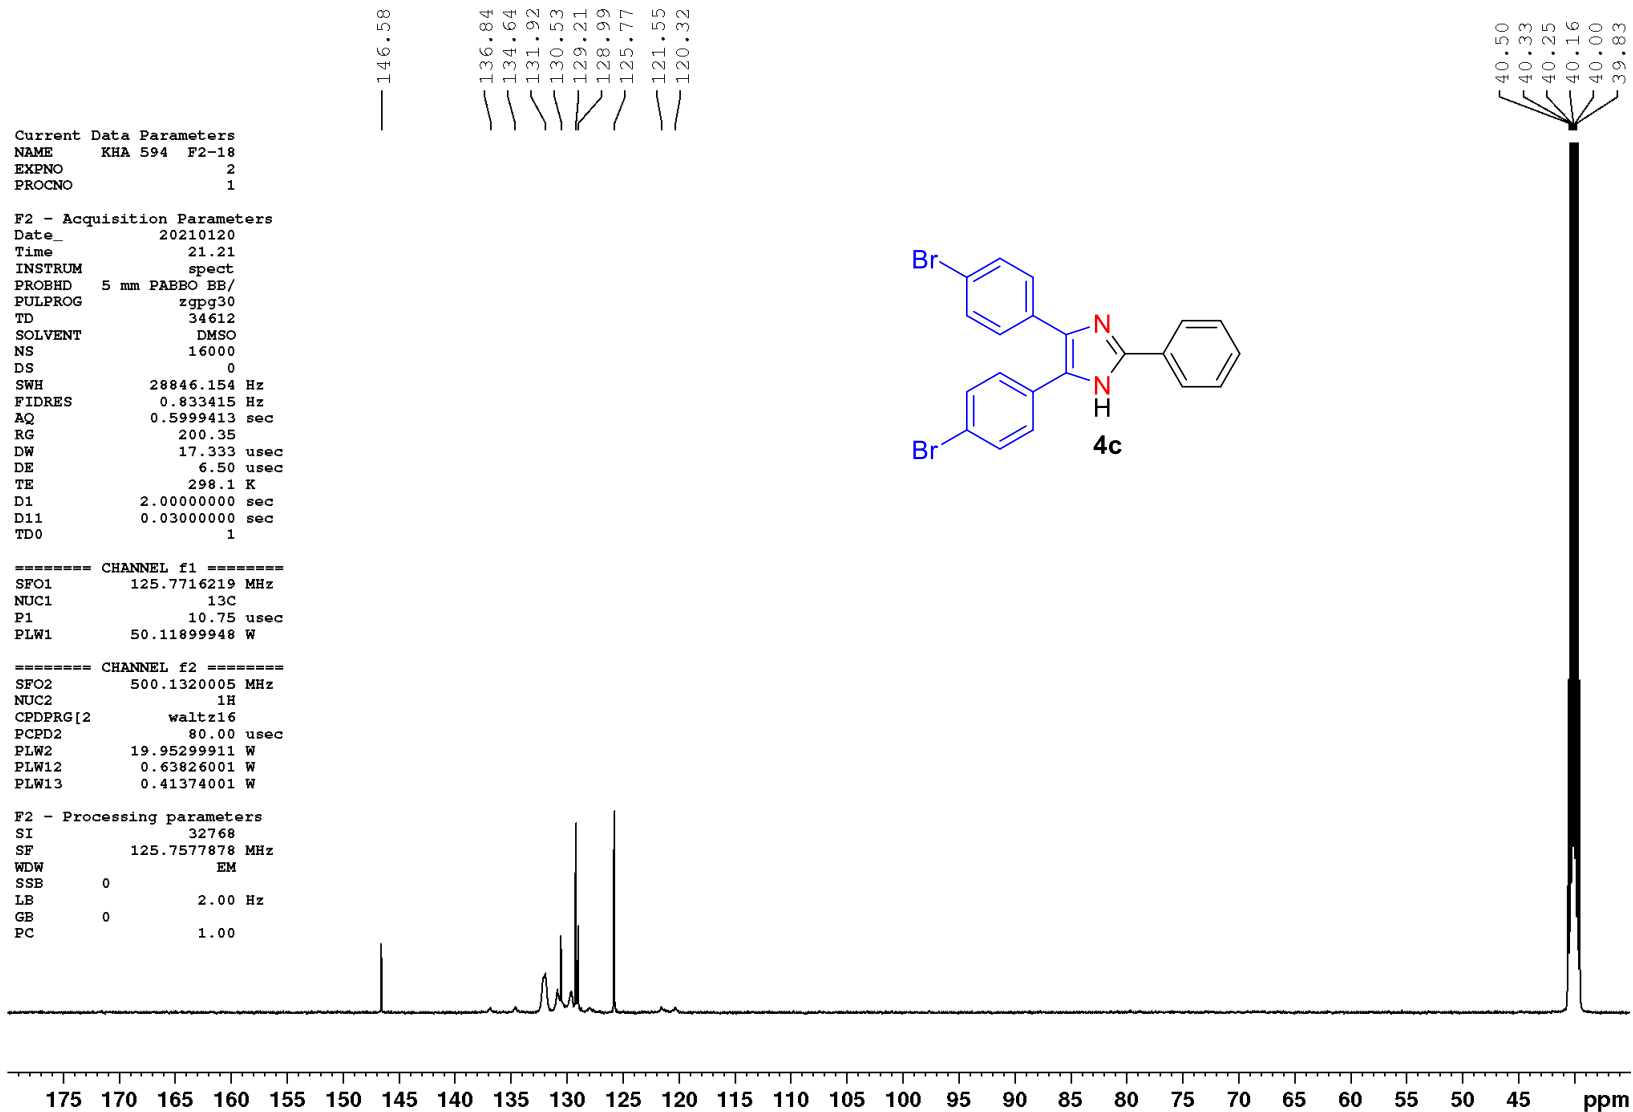

Figure S67. <sup>13</sup>C NMR spectrum of compound 4c (125 MHz, DMSO-d<sub>6</sub>, 25 °C)

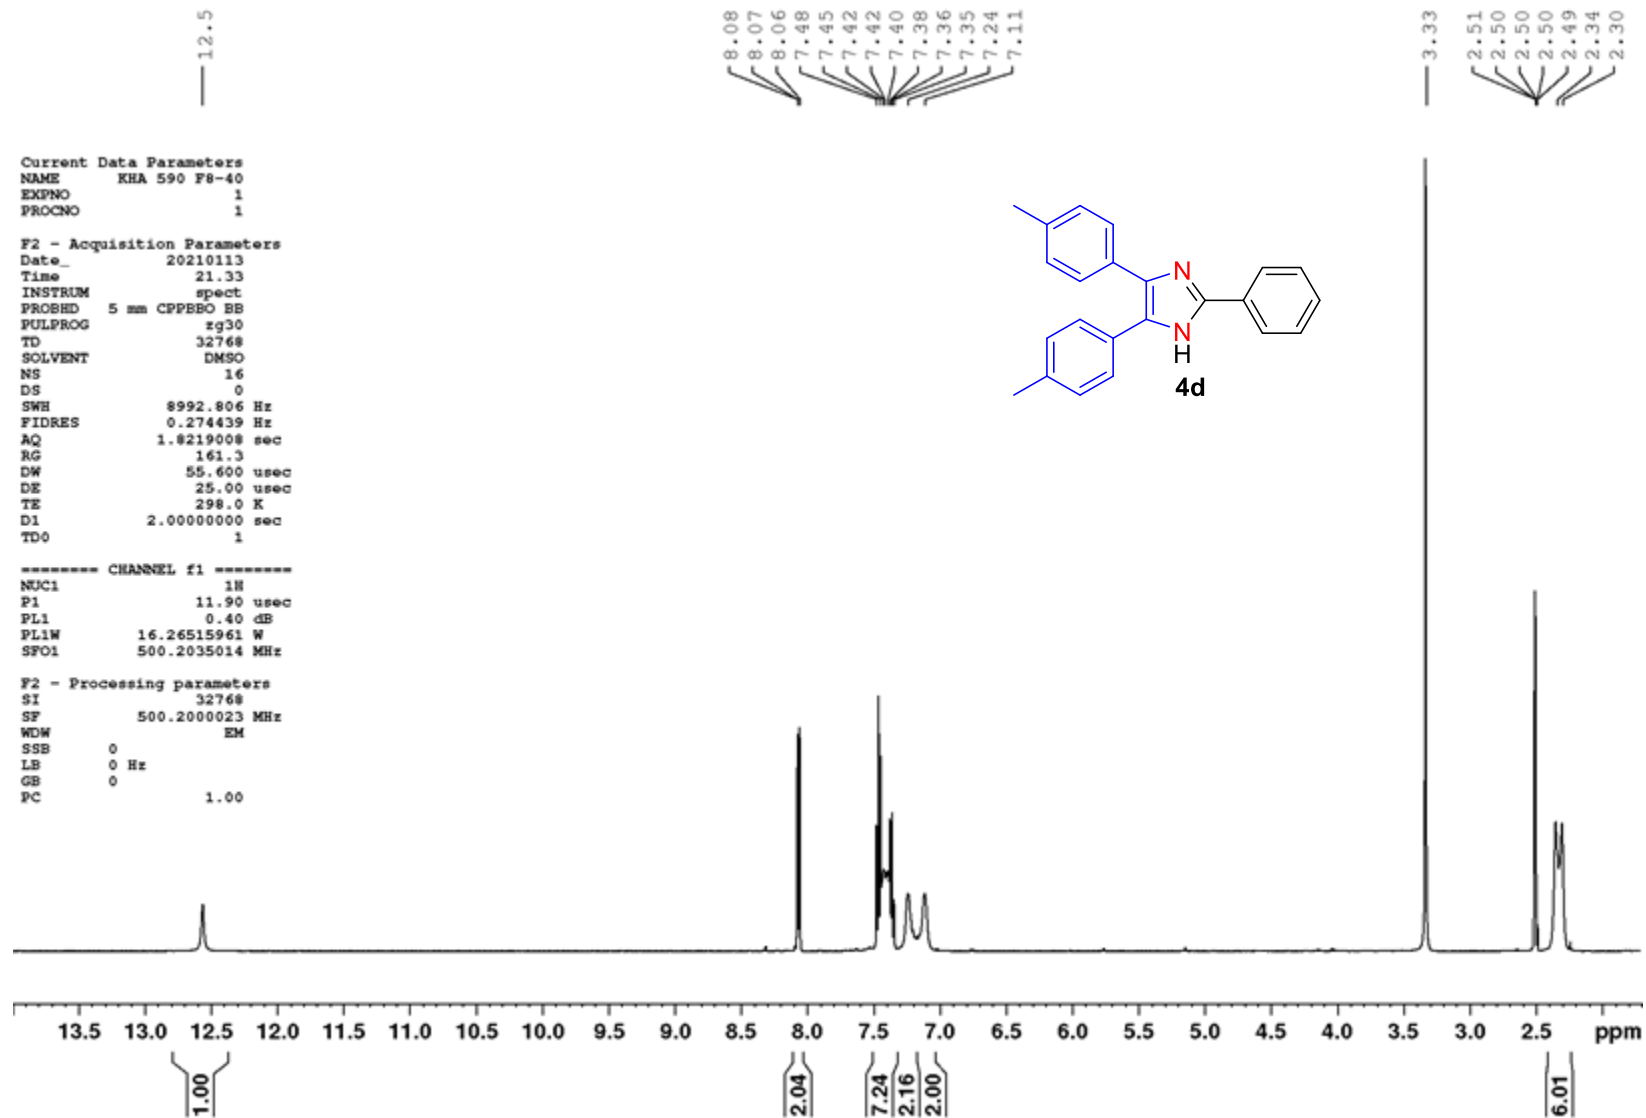

Figure S68.  $^1\text{H}$  NMR spectrum of compound **4d** (500 MHz, DMSO- $d_6$ , 25  $^\circ\text{C}$ )

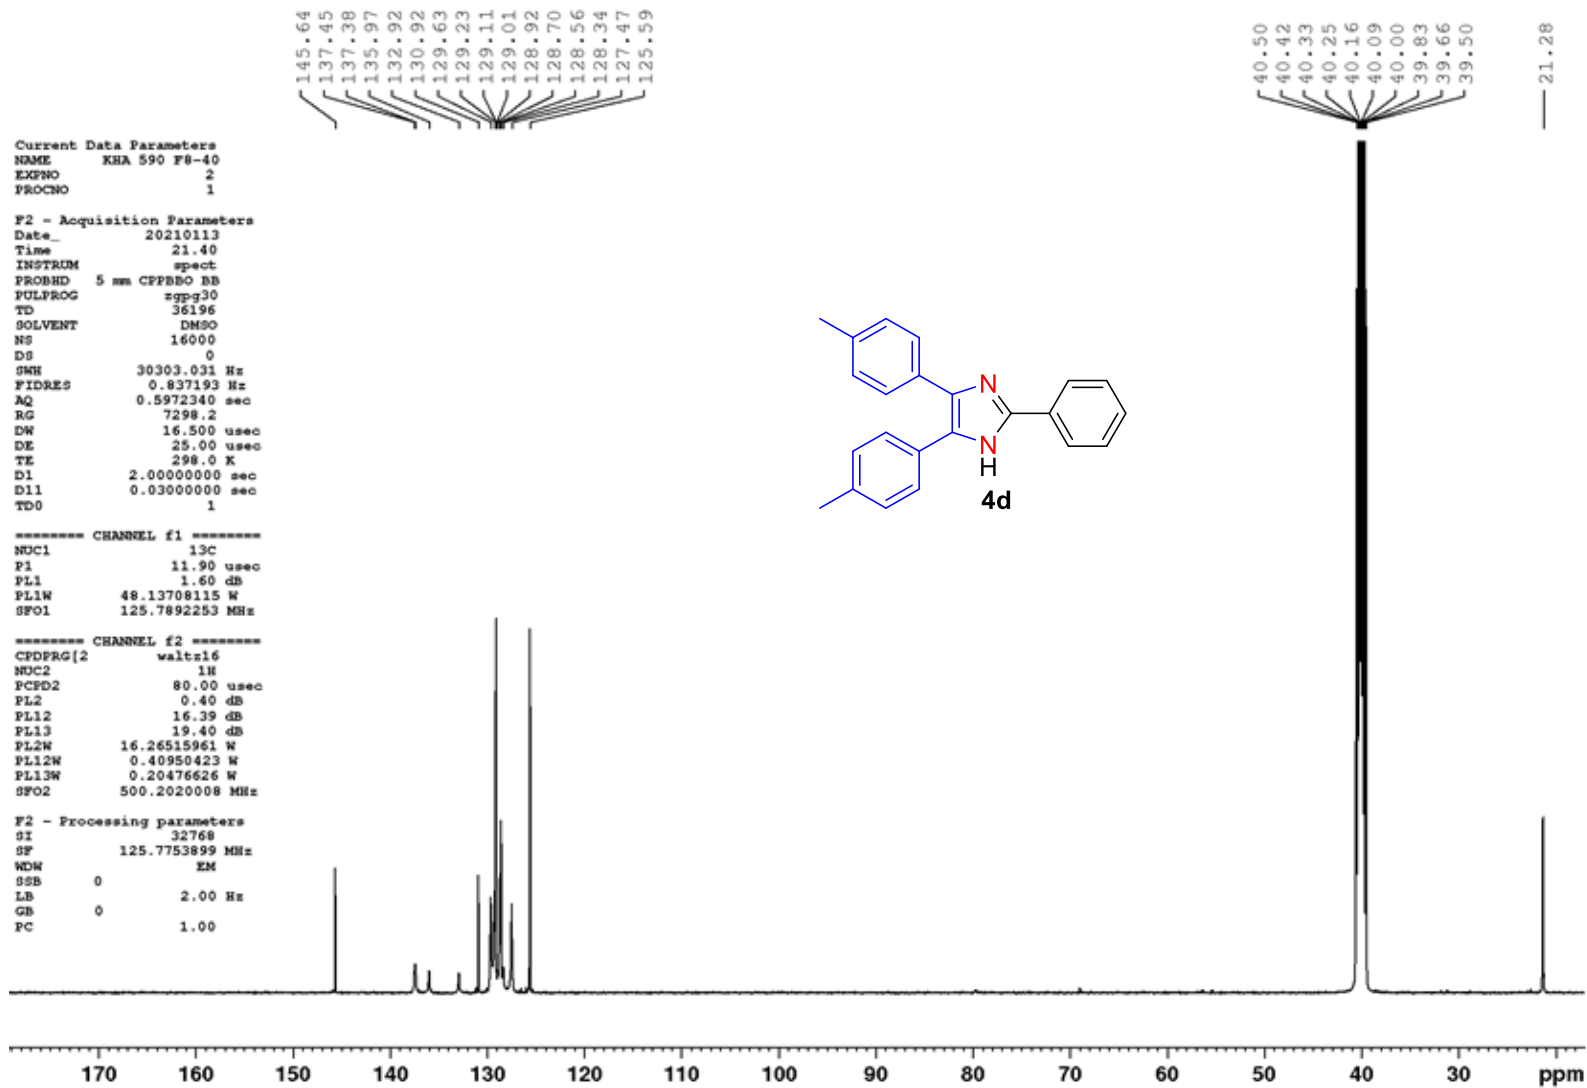

Figure S69.  $^{13}\text{C}$  NMR spectrum of compound **4d** (125 MHz, DMSO- $d_6$ , 25  $^{\circ}\text{C}$ )

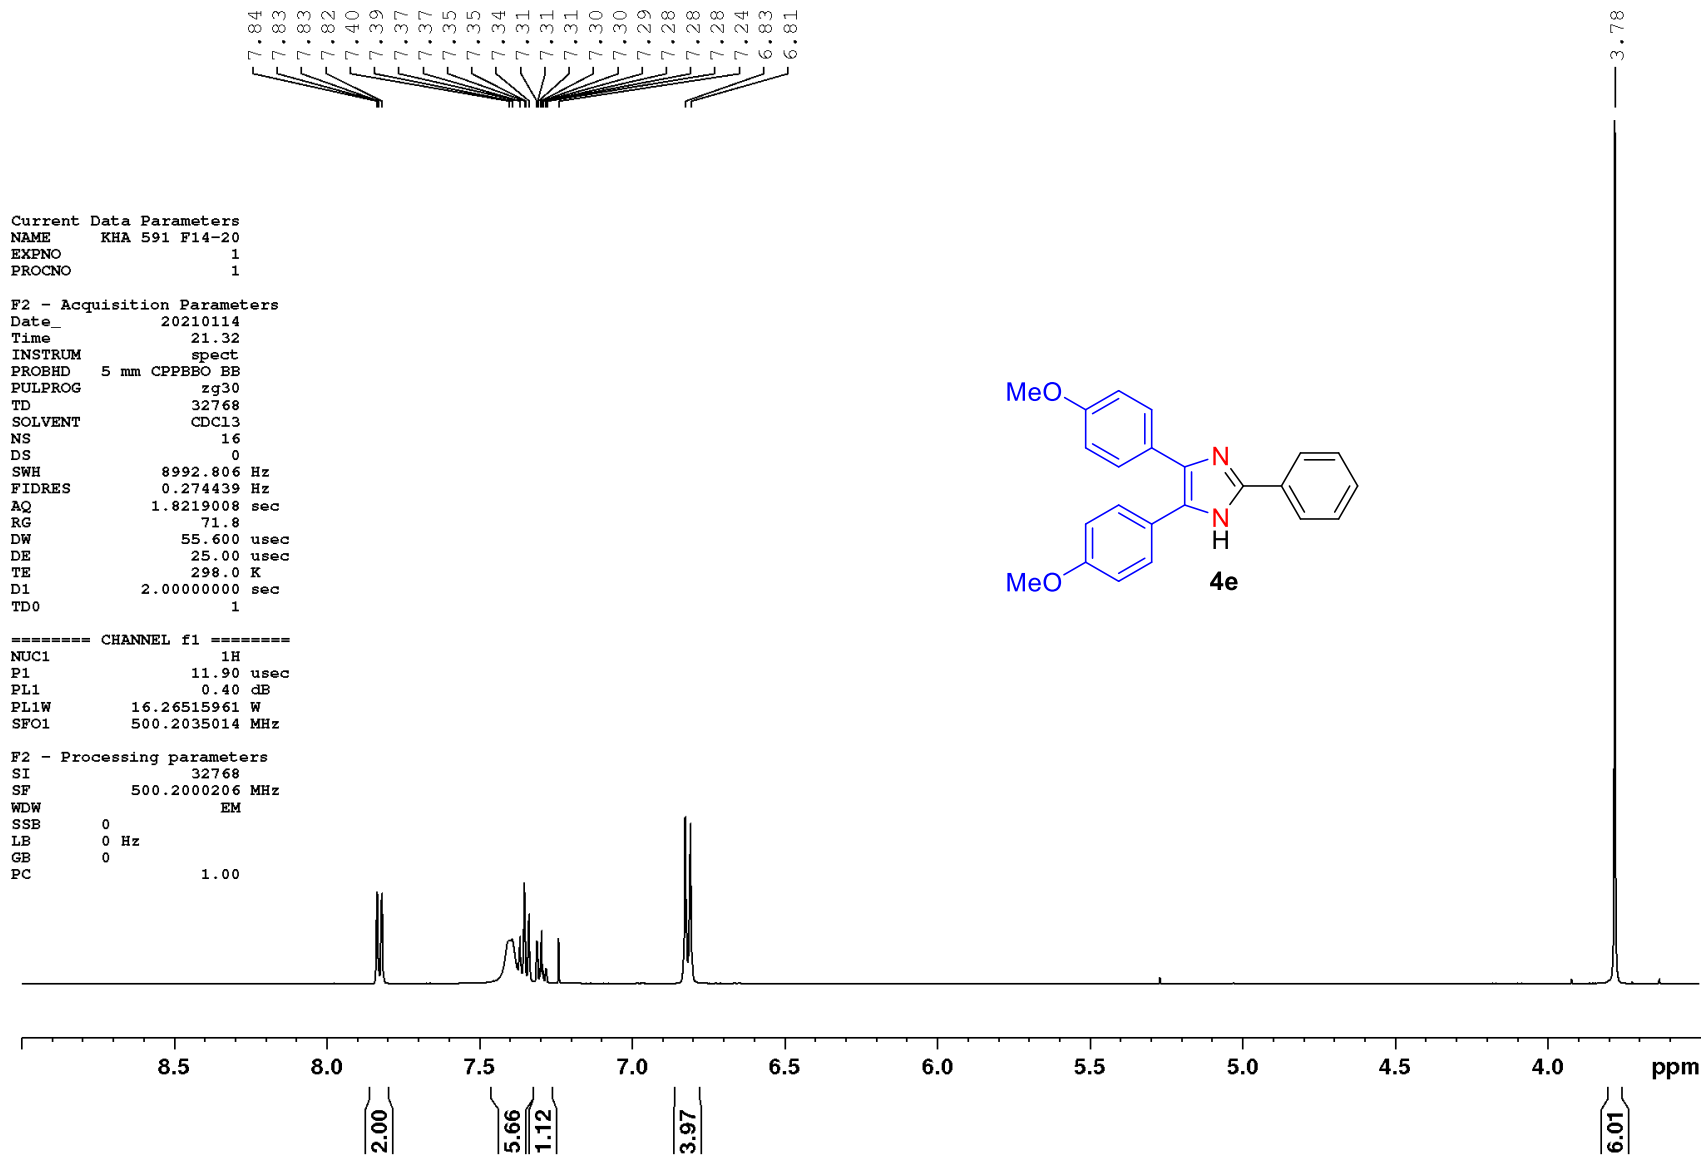

Figure S70. <sup>1</sup>H NMR spectrum of compound **4e** (500 MHz, CDCl<sub>3</sub>, 25 °C)



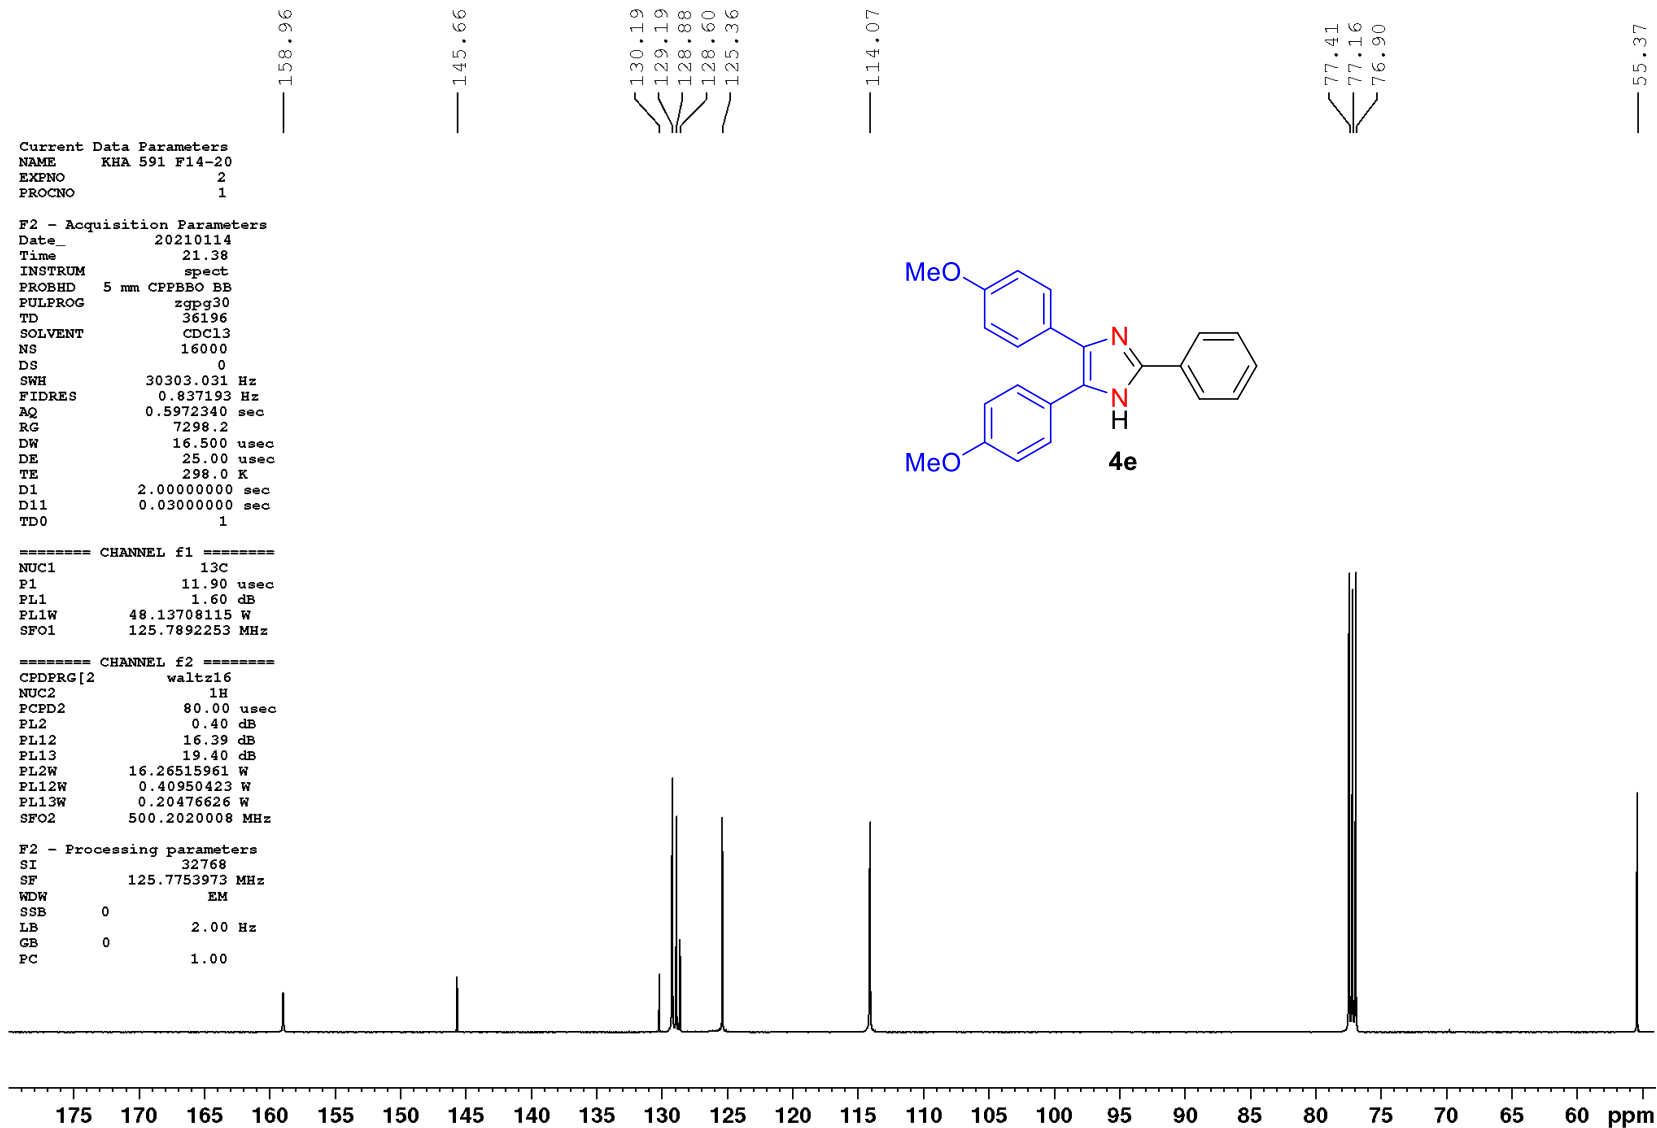

Figure S71. <sup>13</sup>C NMR spectrum of compound **4e** (125 MHz, CDCl<sub>3</sub>, 25 °C)

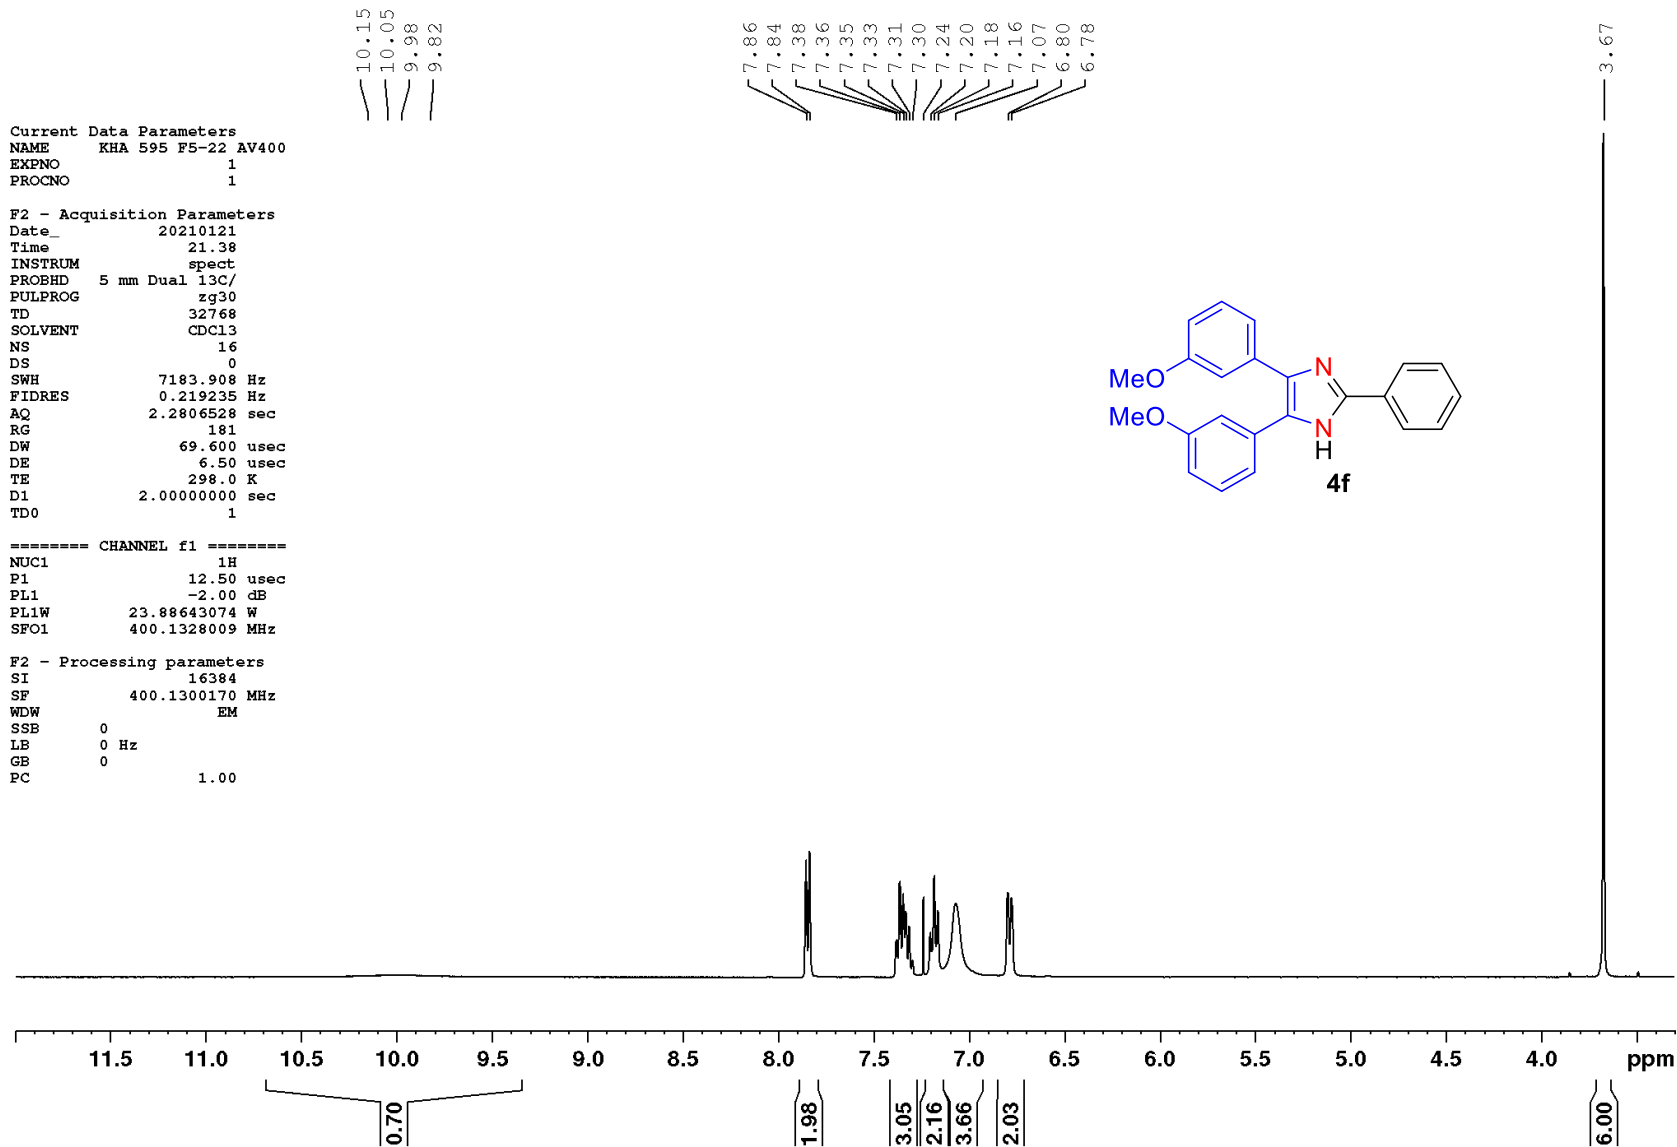

Figure S72. <sup>1</sup>H NMR spectrum of compound **4f** (400 MHz, CDCl<sub>3</sub>, 25 °C)

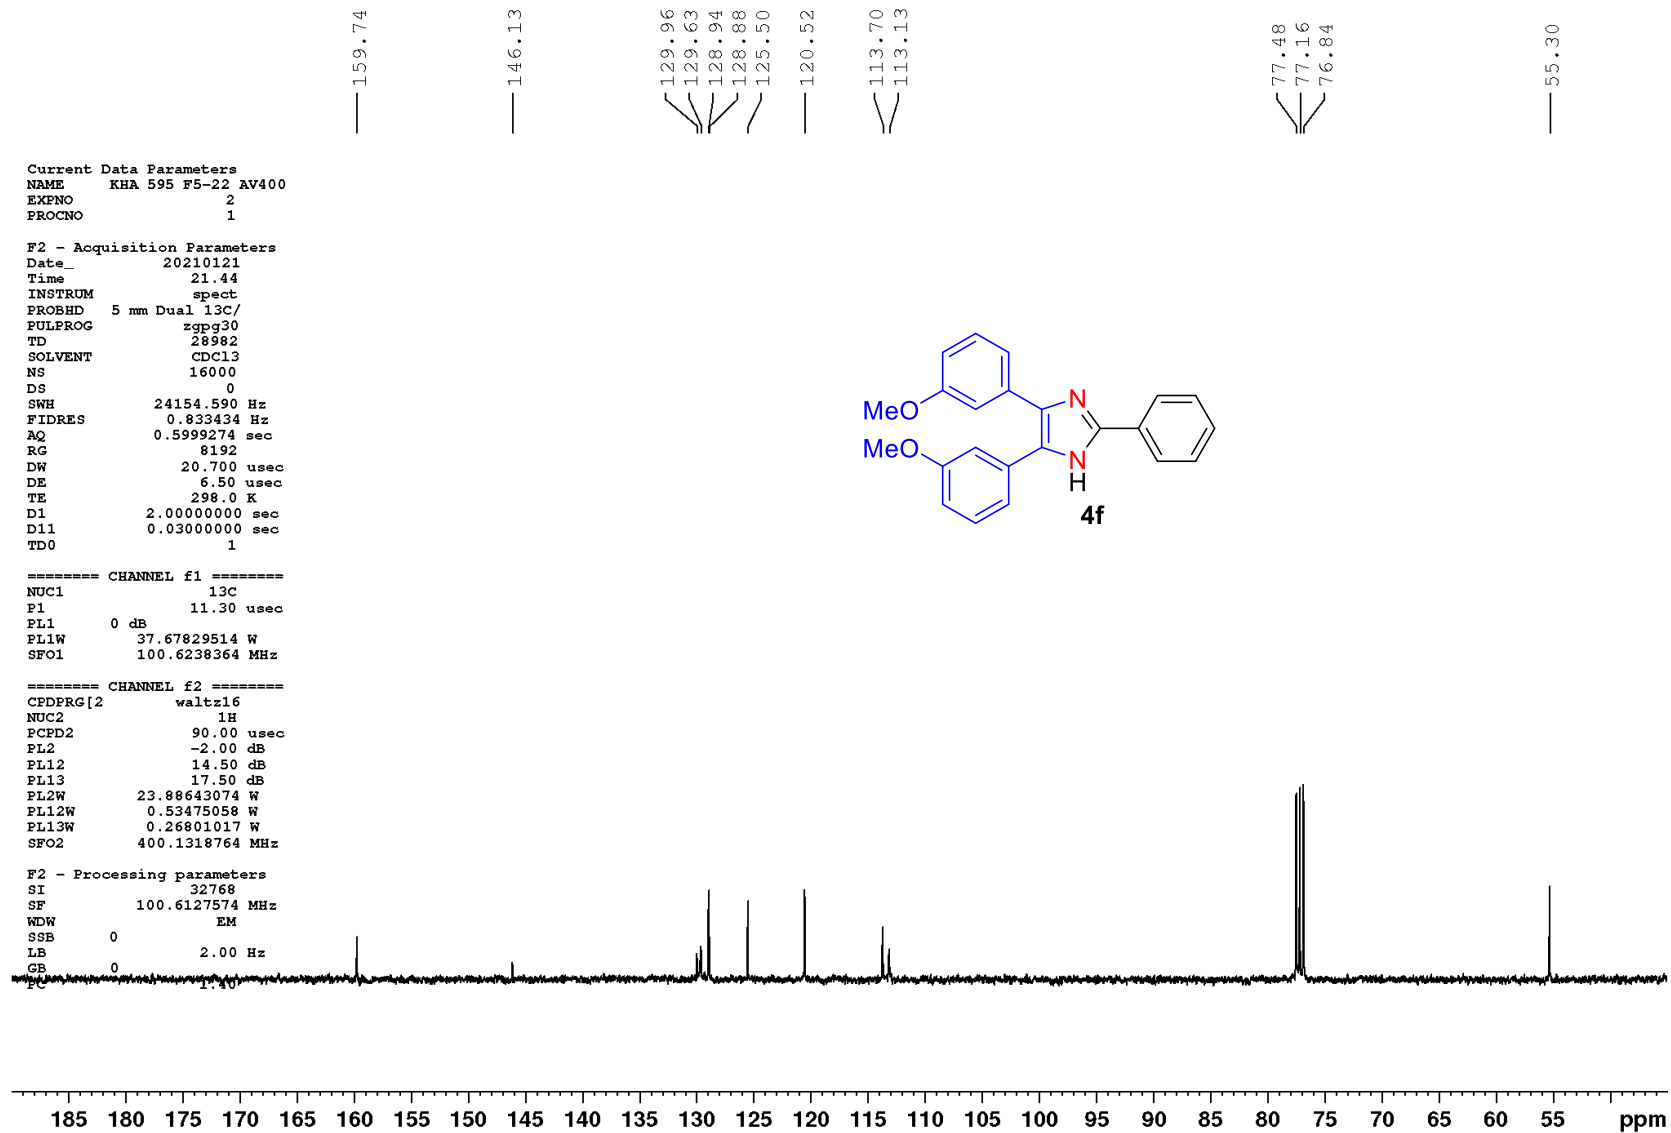

Figure S73. <sup>13</sup>C NMR spectrum of compound **4f** (100 MHz, CDCl<sub>3</sub>, 25 °C)

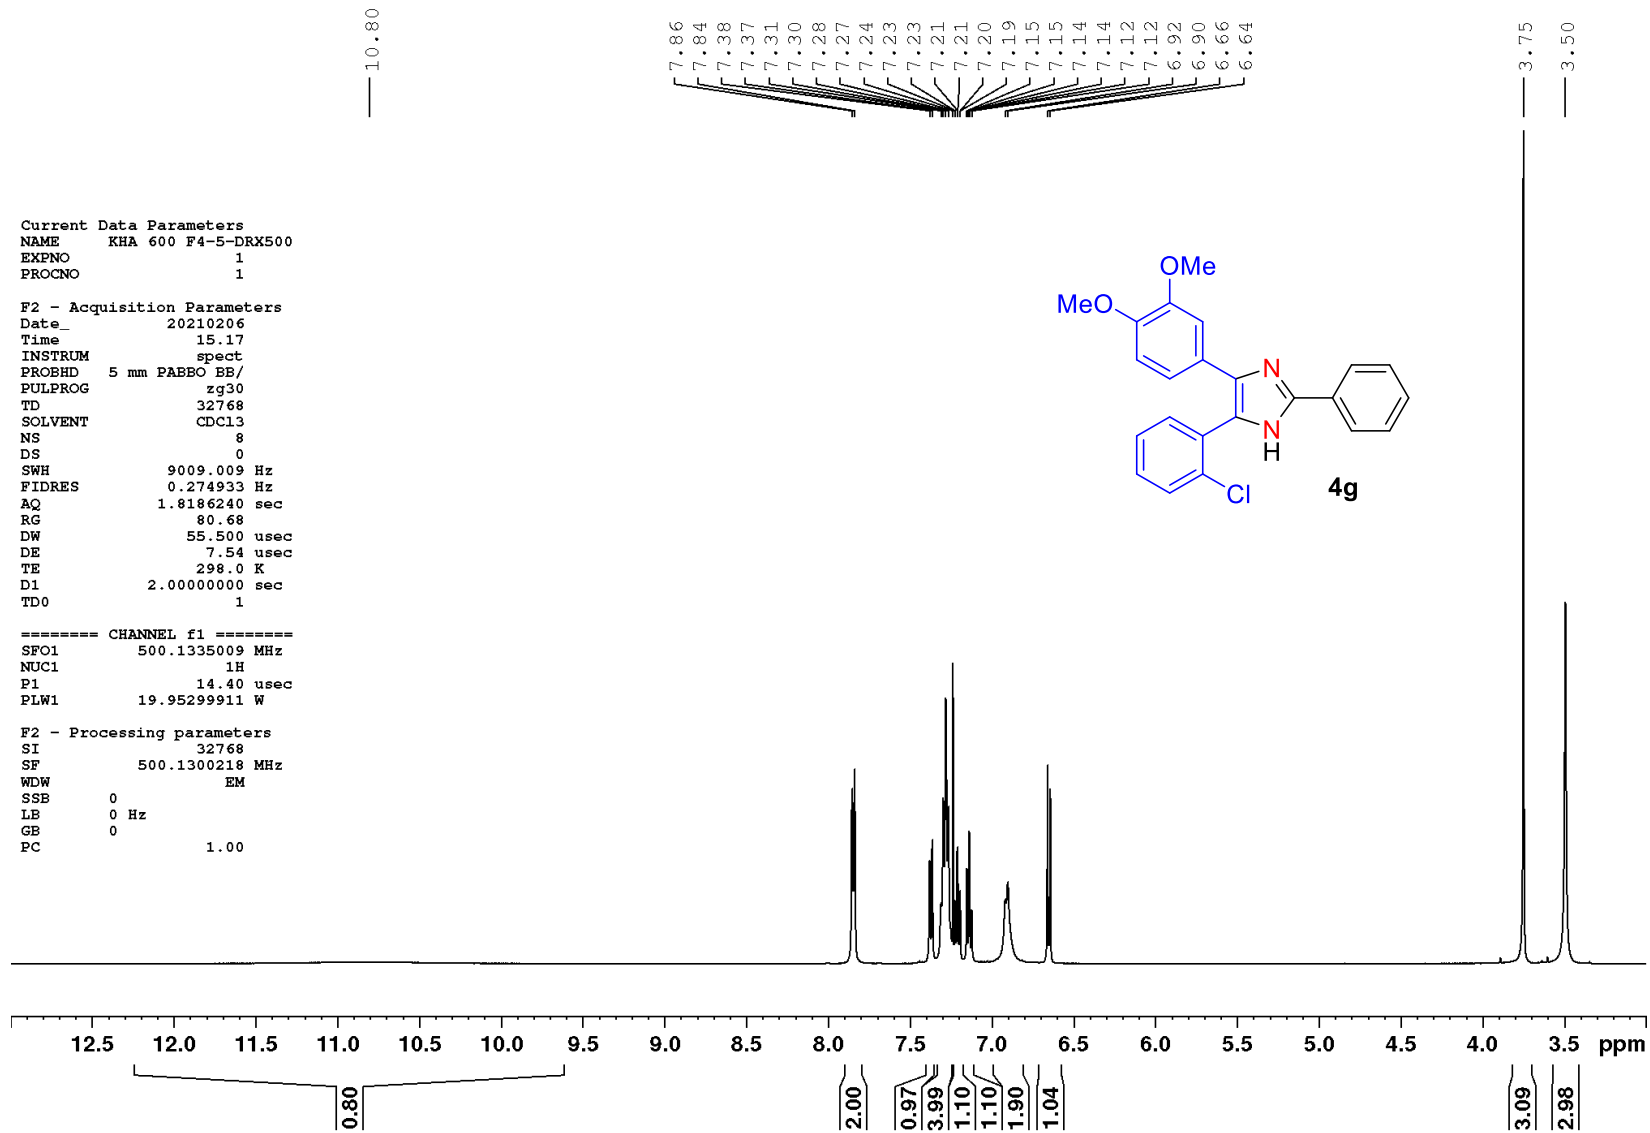

Figure S74.  $^1\text{H}$  NMR spectrum of compound **4g** (500 MHz,  $\text{CDCl}_3$ , 25  $^\circ\text{C}$ )

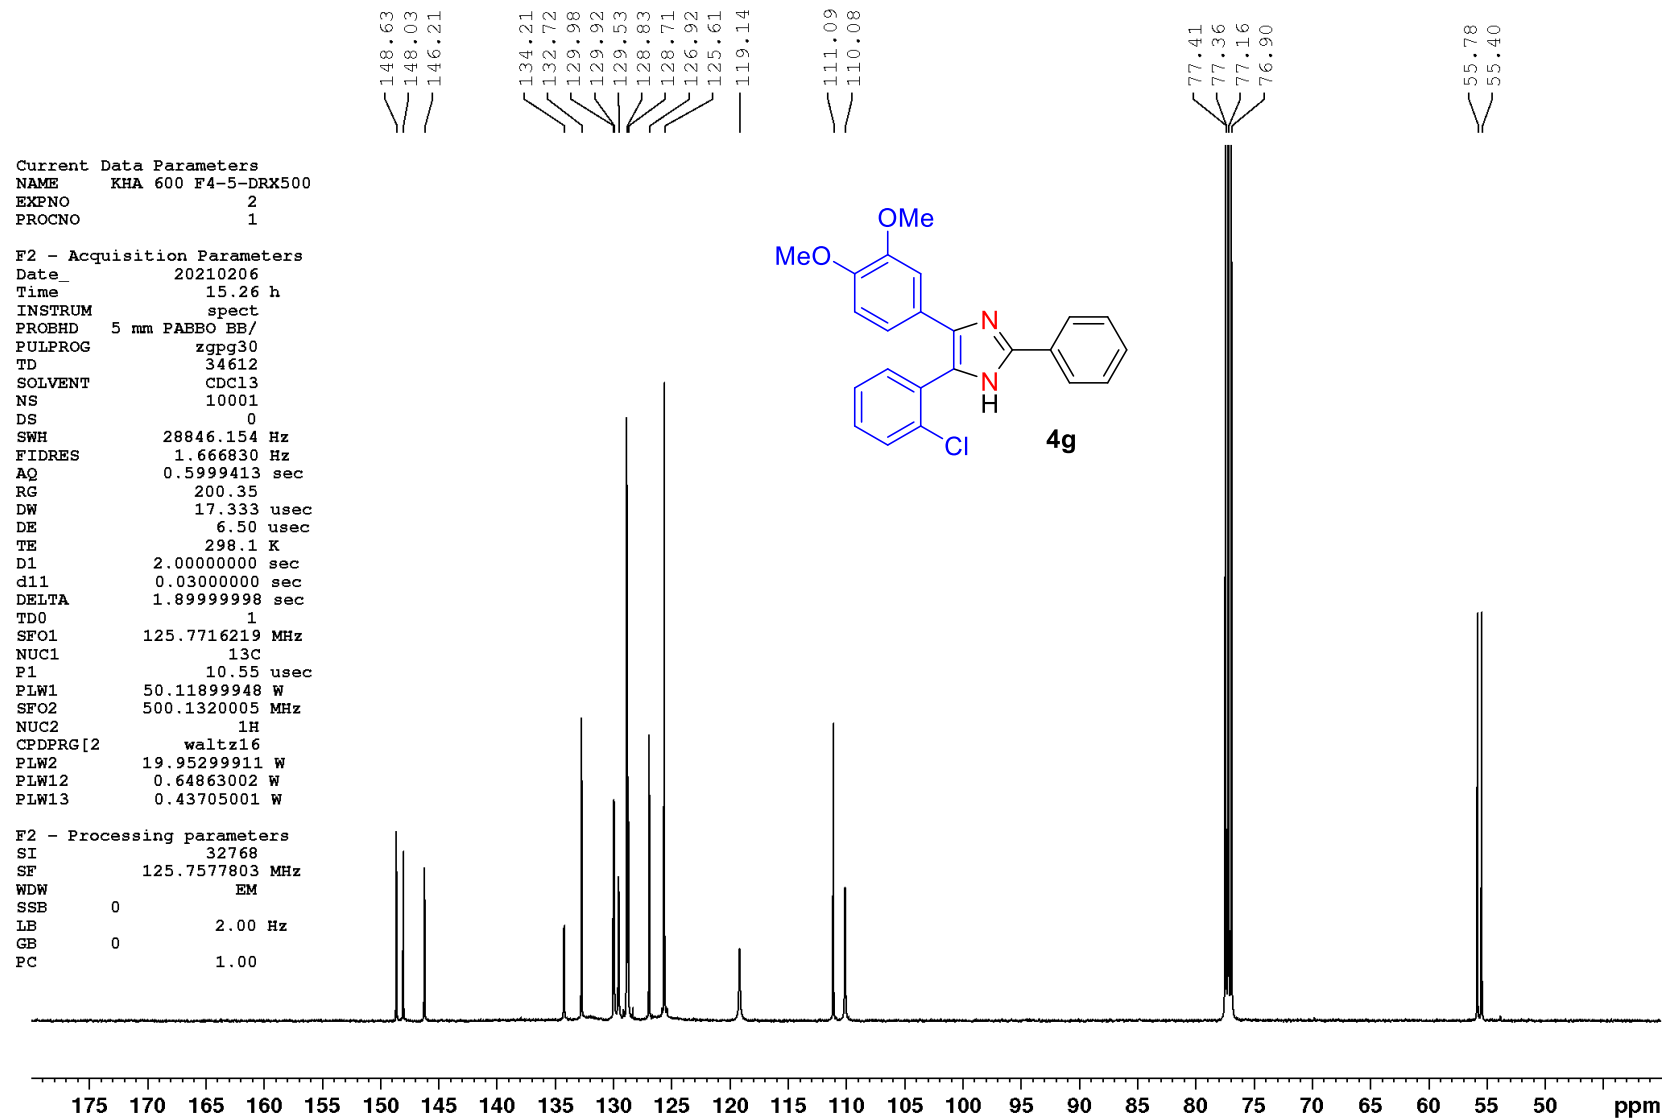

Figure S75.  $^{13}\text{C}$  NMR spectrum of compound **4g** (125 MHz,  $\text{CDCl}_3$ , 25  $^\circ\text{C}$ )

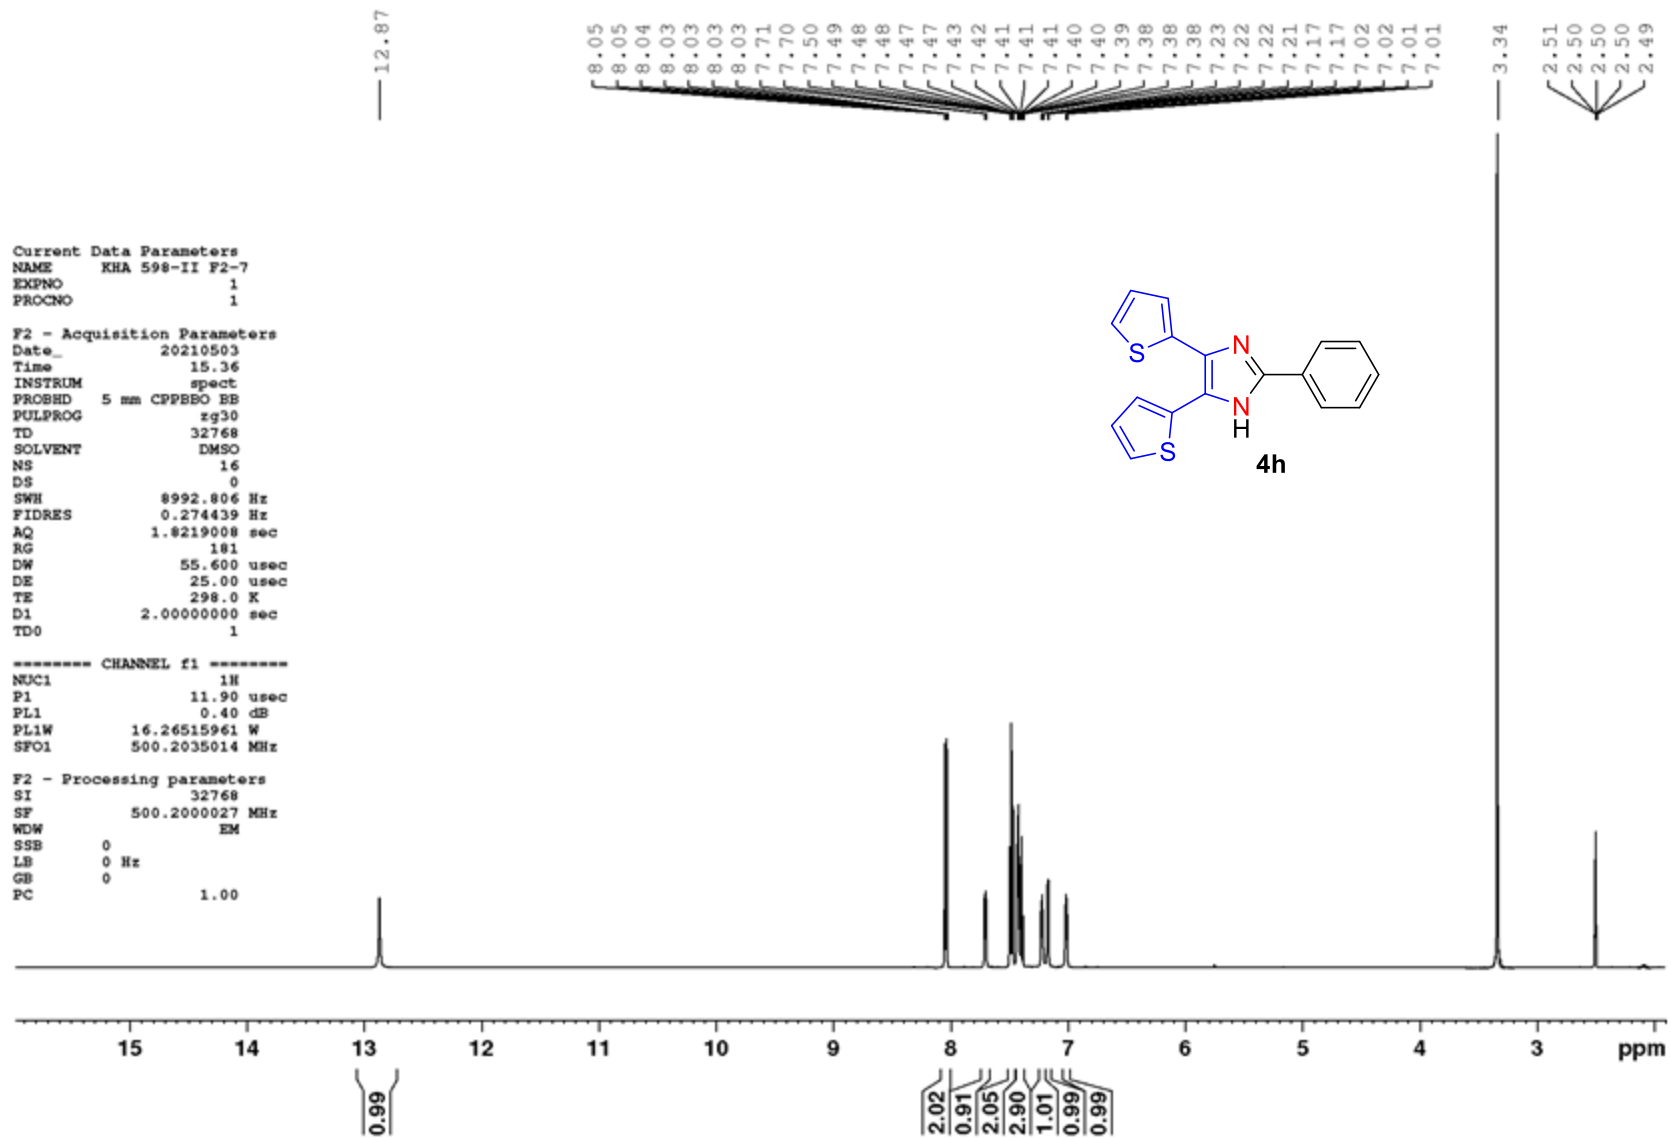

Figure S76.  $^1\text{H}$  NMR spectrum of compound **4h** (500 MHz,  $\text{DMSO-}d_6$ , 25  $^\circ\text{C}$ )

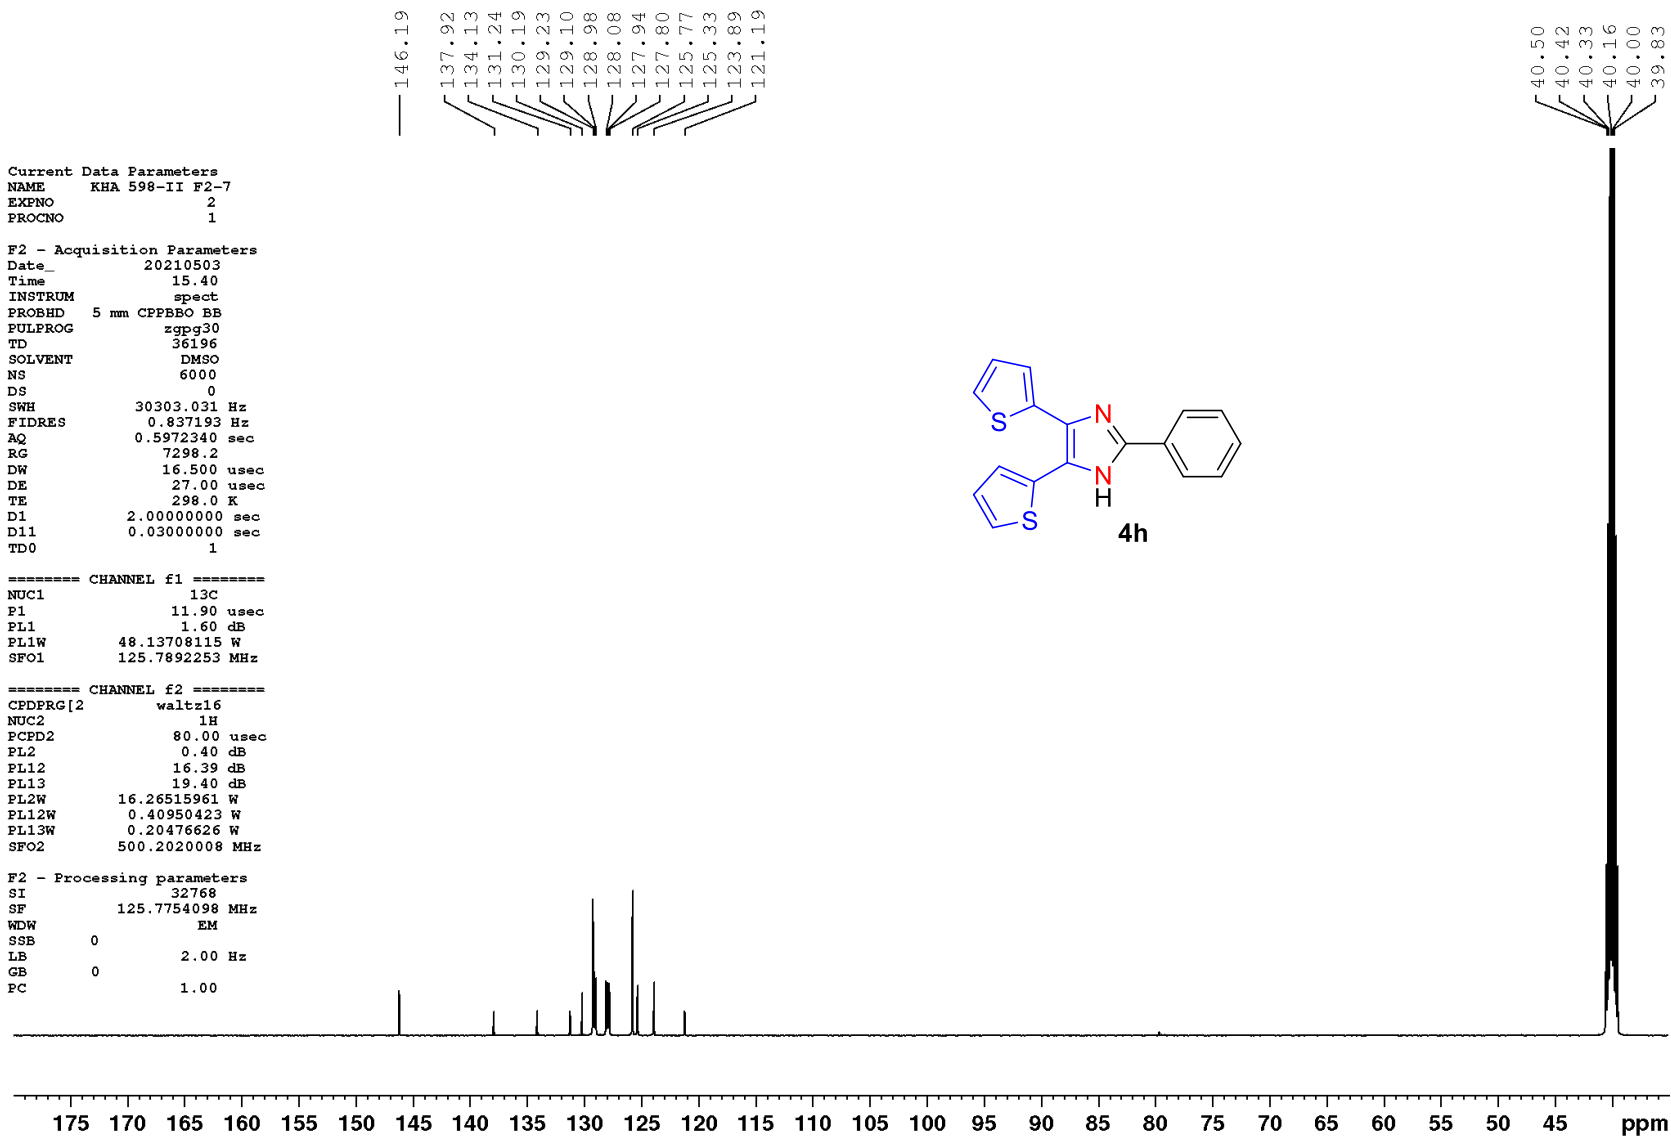

Figure S77.  $^{13}\text{C}$  NMR spectrum of compound **4h** (125 MHz,  $\text{DMSO-}d_6$ , 25  $^\circ\text{C}$ )

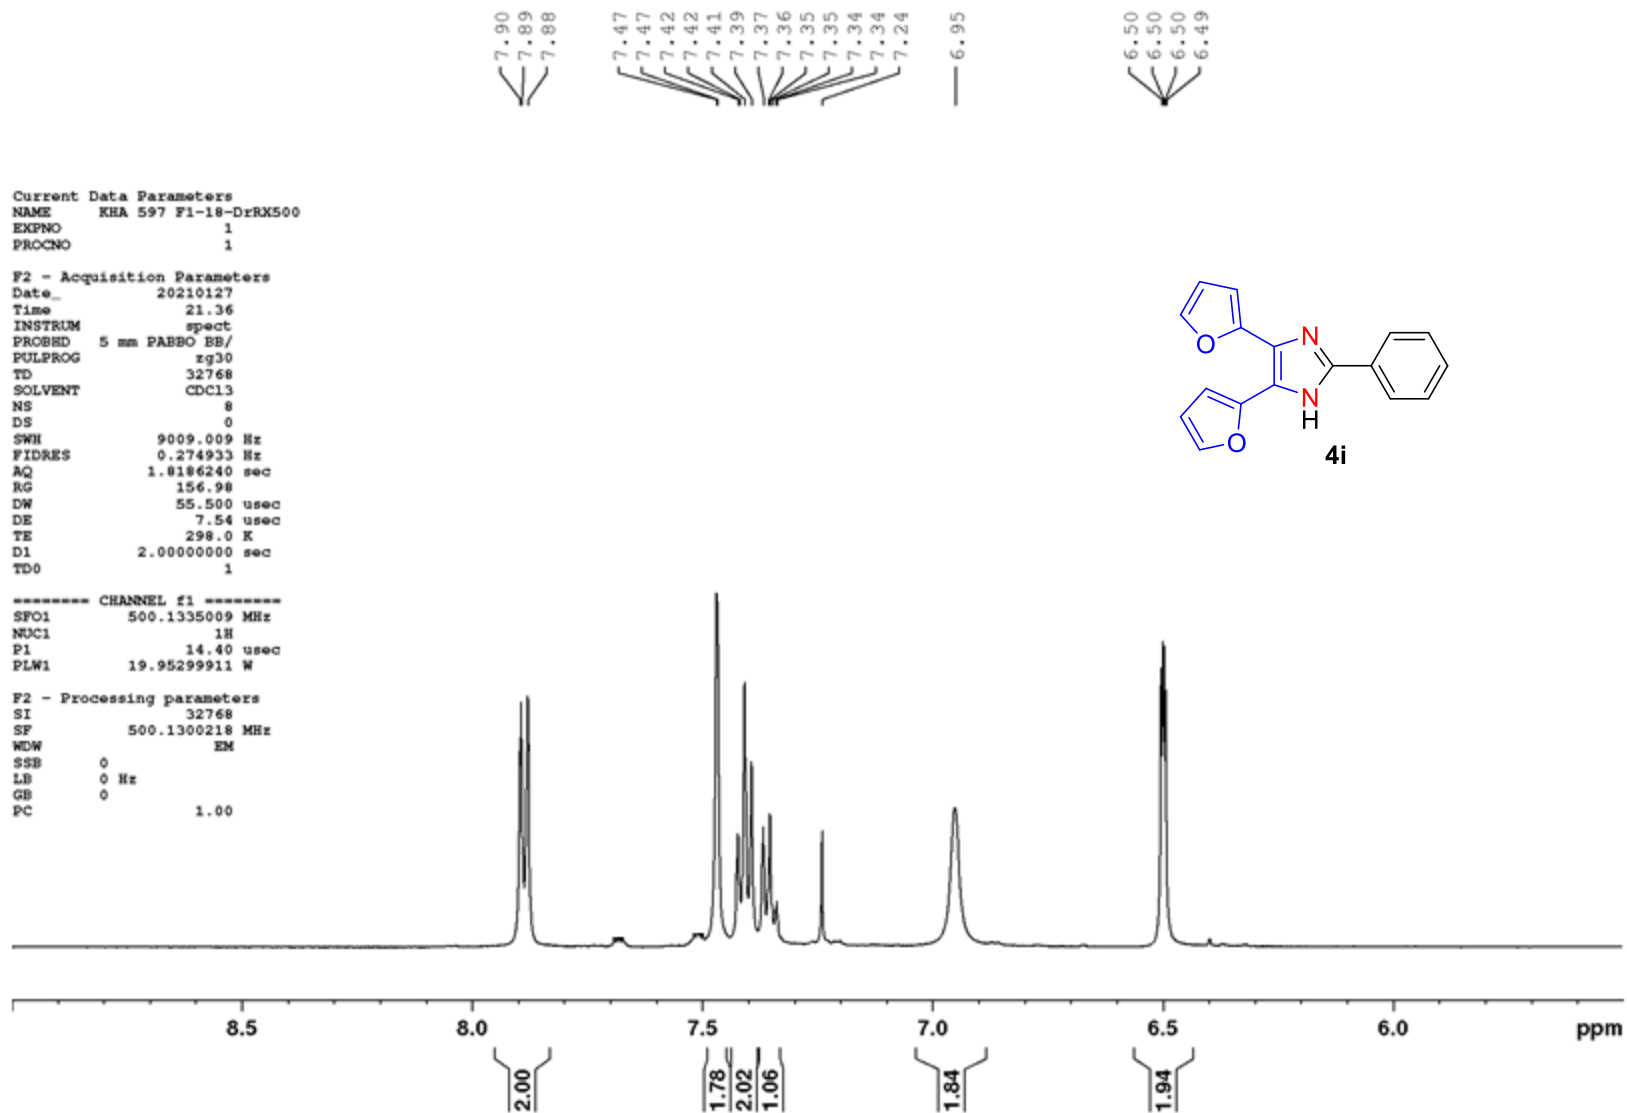

Figure S78.  $^1\text{H}$  NMR spectrum of compound **4i** (500 MHz,  $\text{CDCl}_3$ , 25  $^\circ\text{C}$ )



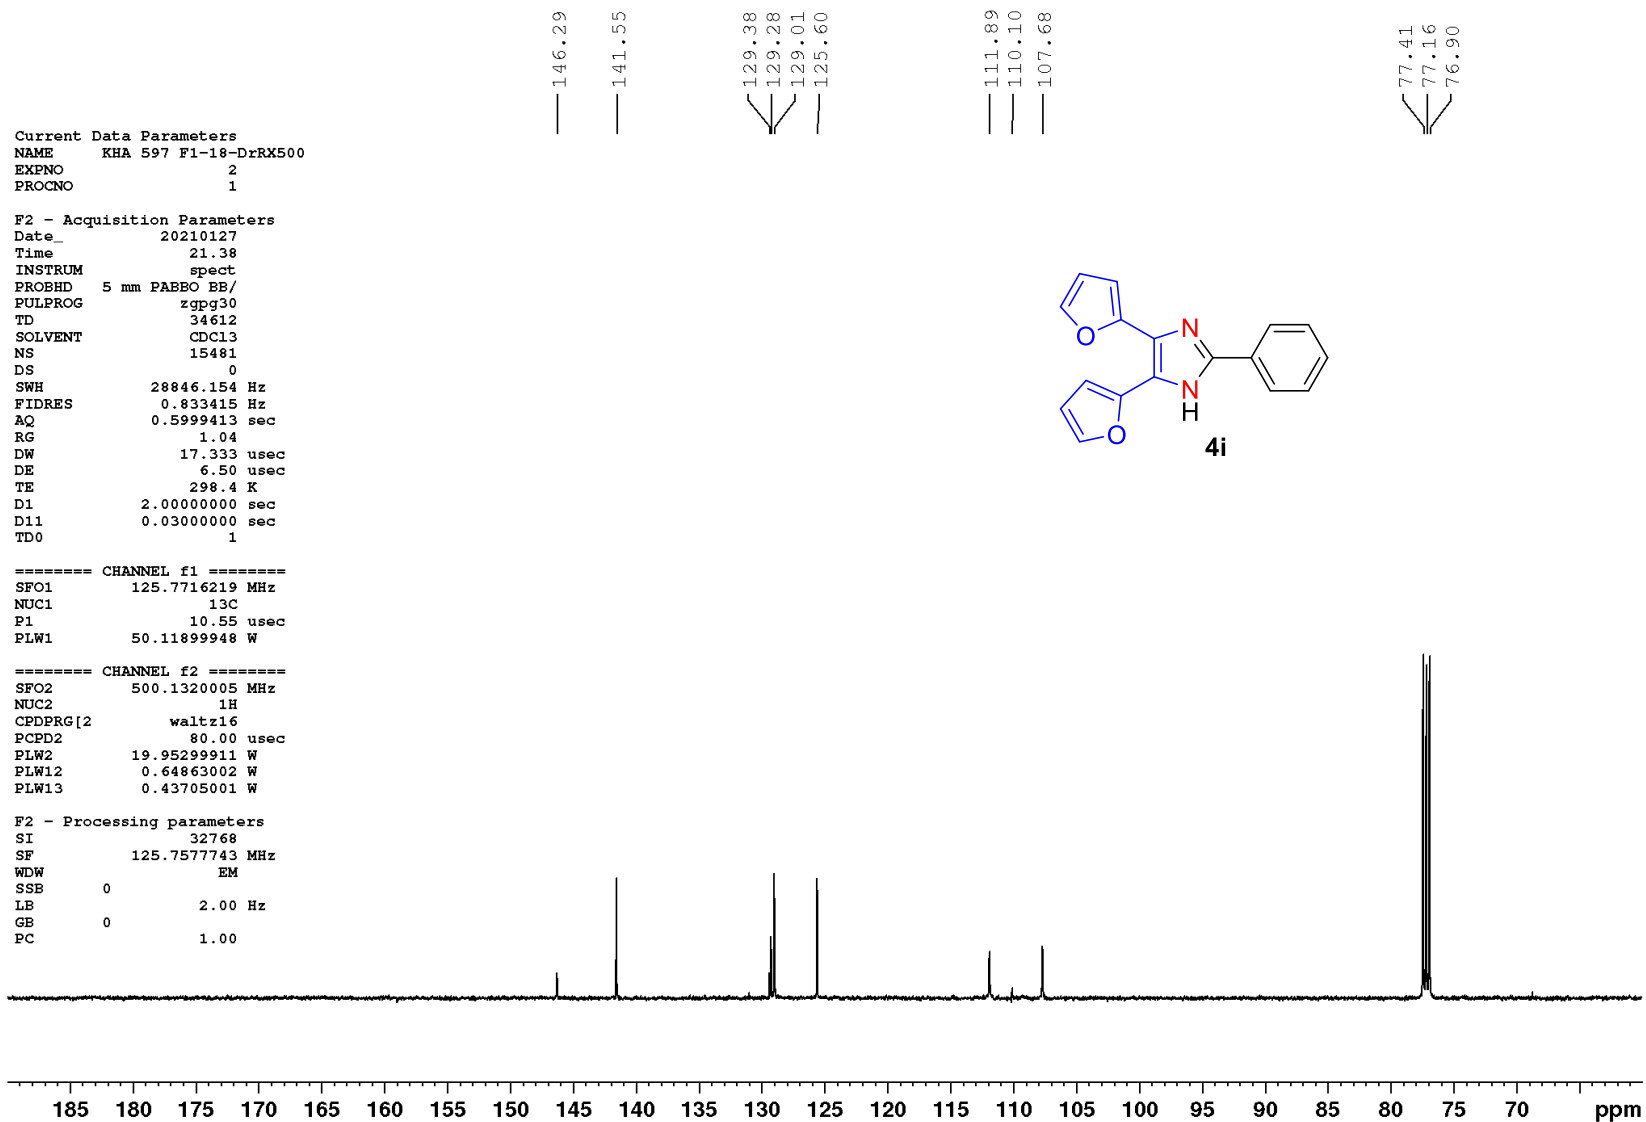

Figure S79.  $^{13}\text{C}$  NMR spectrum of compound **4i** (125 MHz,  $\text{CDCl}_3$ , 25 °C)

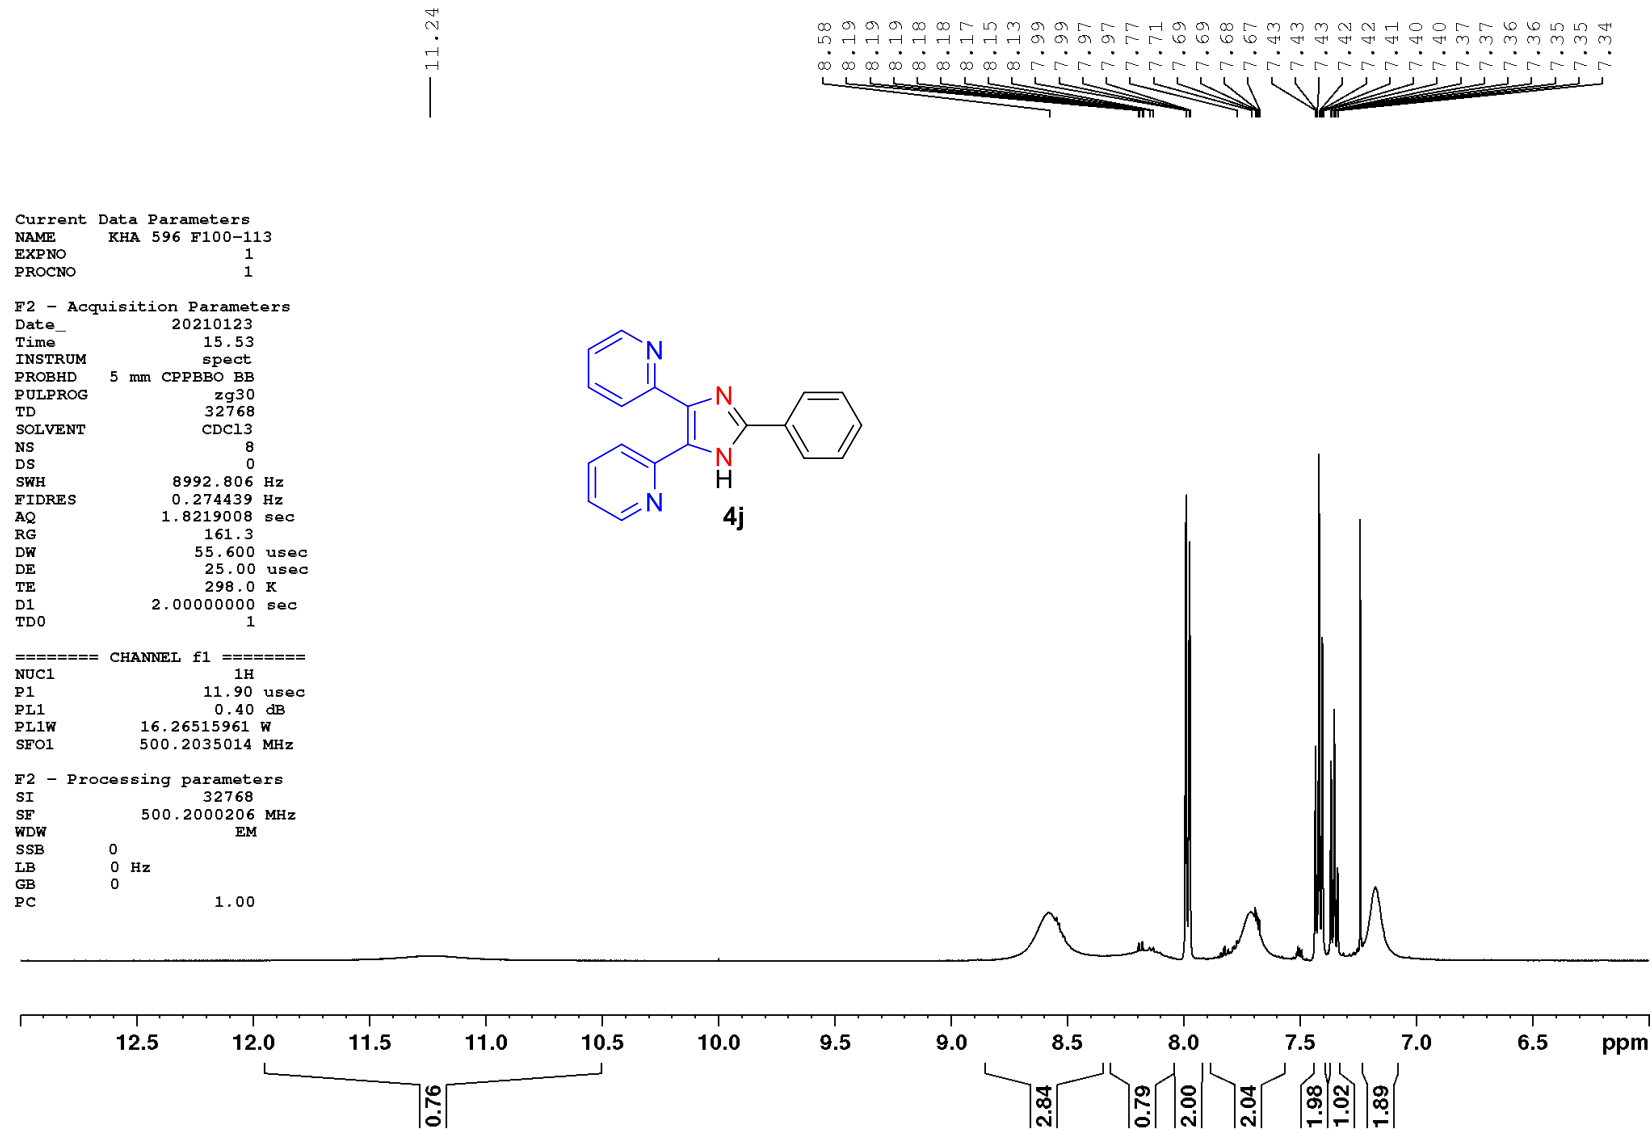

Figure S80. <sup>1</sup>H NMR spectrum of compound **4j** (500 MHz, CDCl<sub>3</sub>, 25 °C)

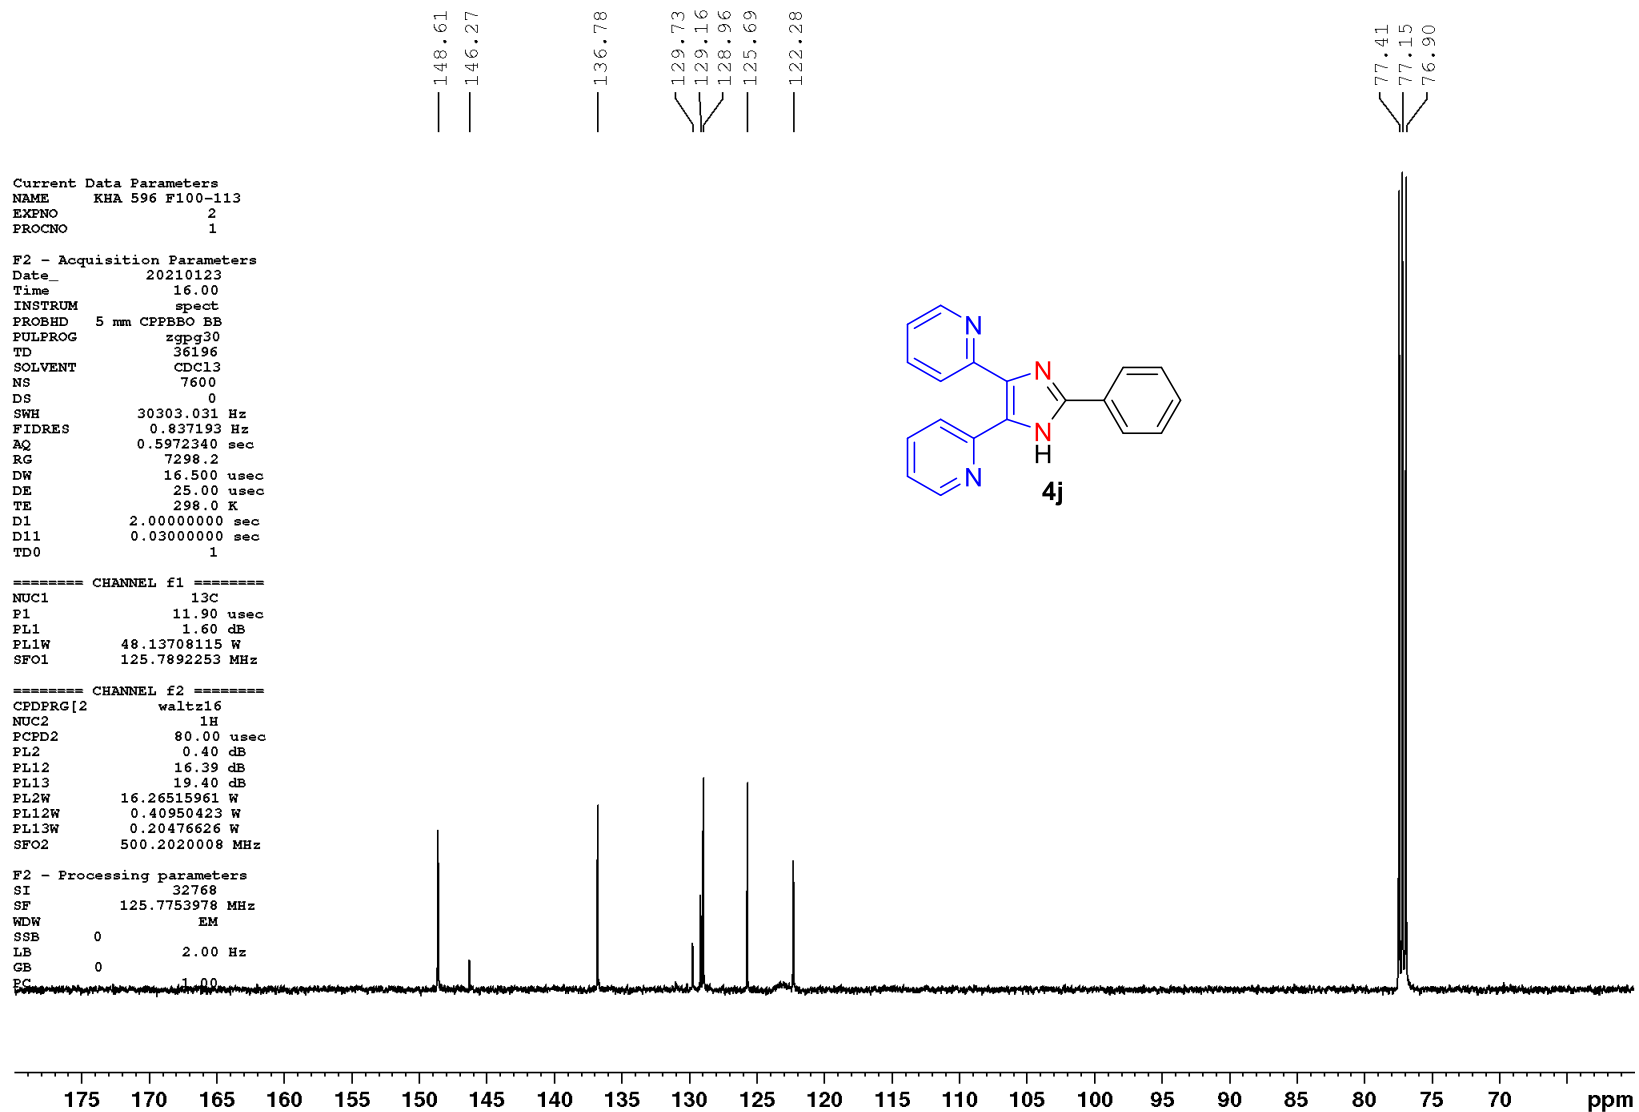

Figure S81.  $^{13}\text{C}$  NMR spectrum of compound **4j** (125 MHz,  $\text{CDCl}_3$ , 25  $^\circ\text{C}$ )

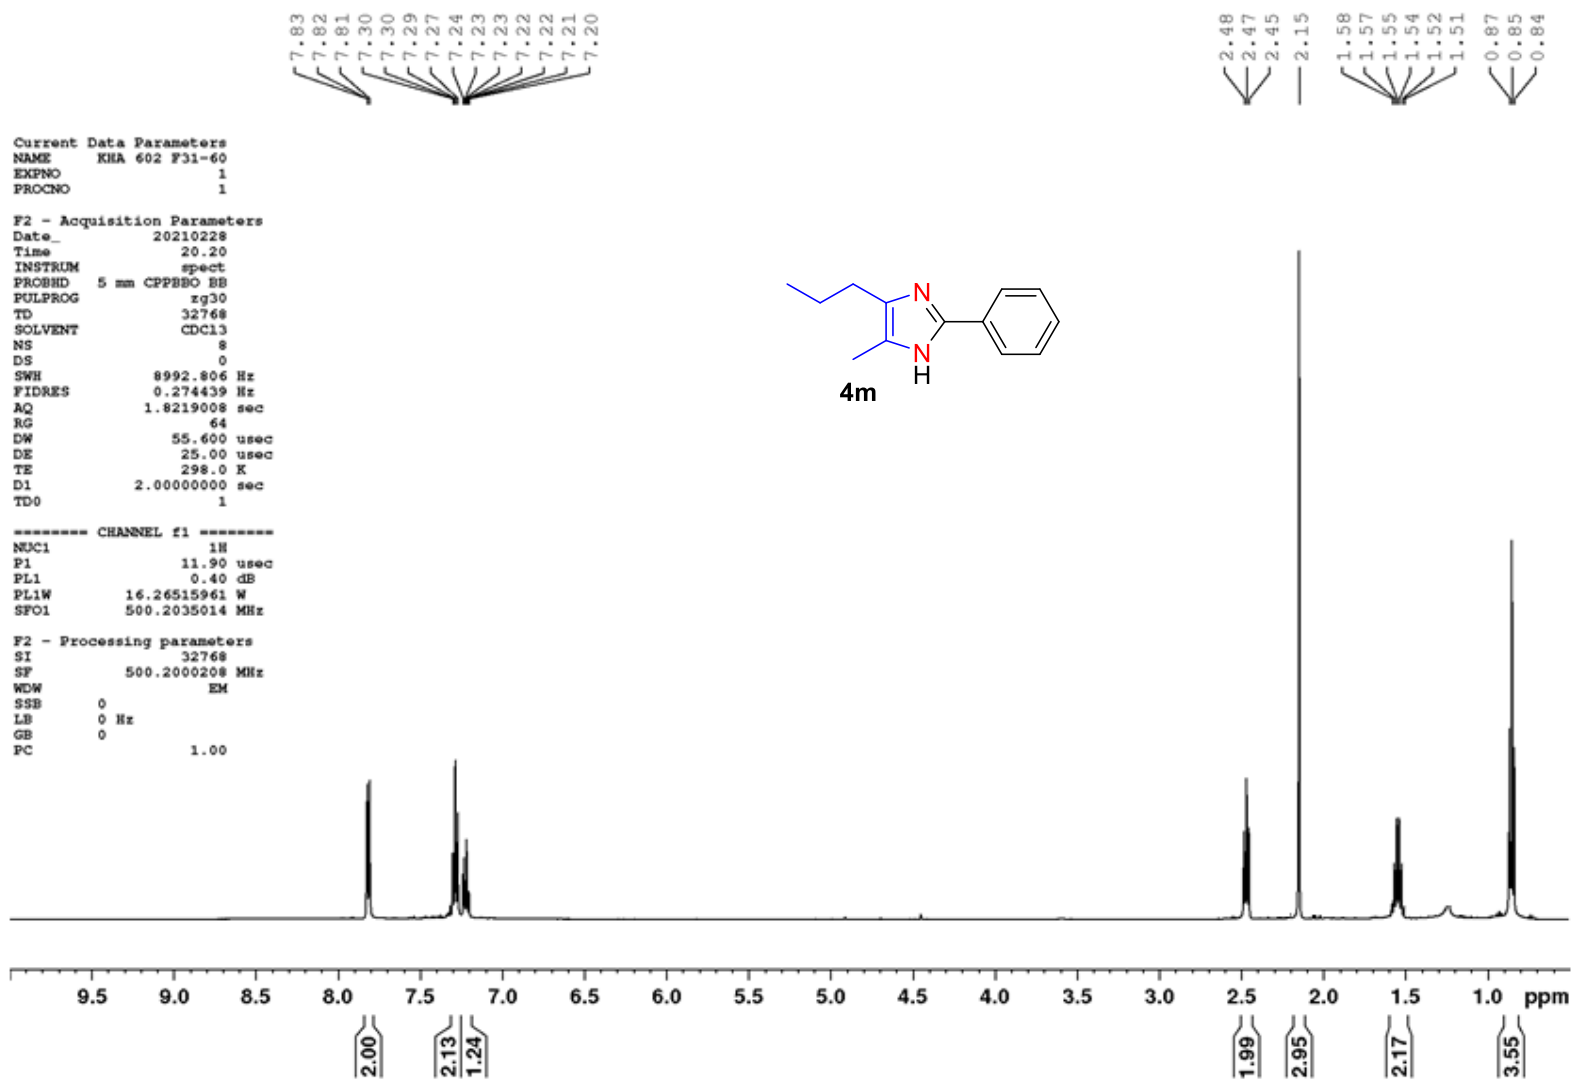

Figure S82.  $^1\text{H}$  NMR spectrum of compound **4m** (500 MHz,  $\text{CDCl}_3$ , 25  $^\circ\text{C}$ )

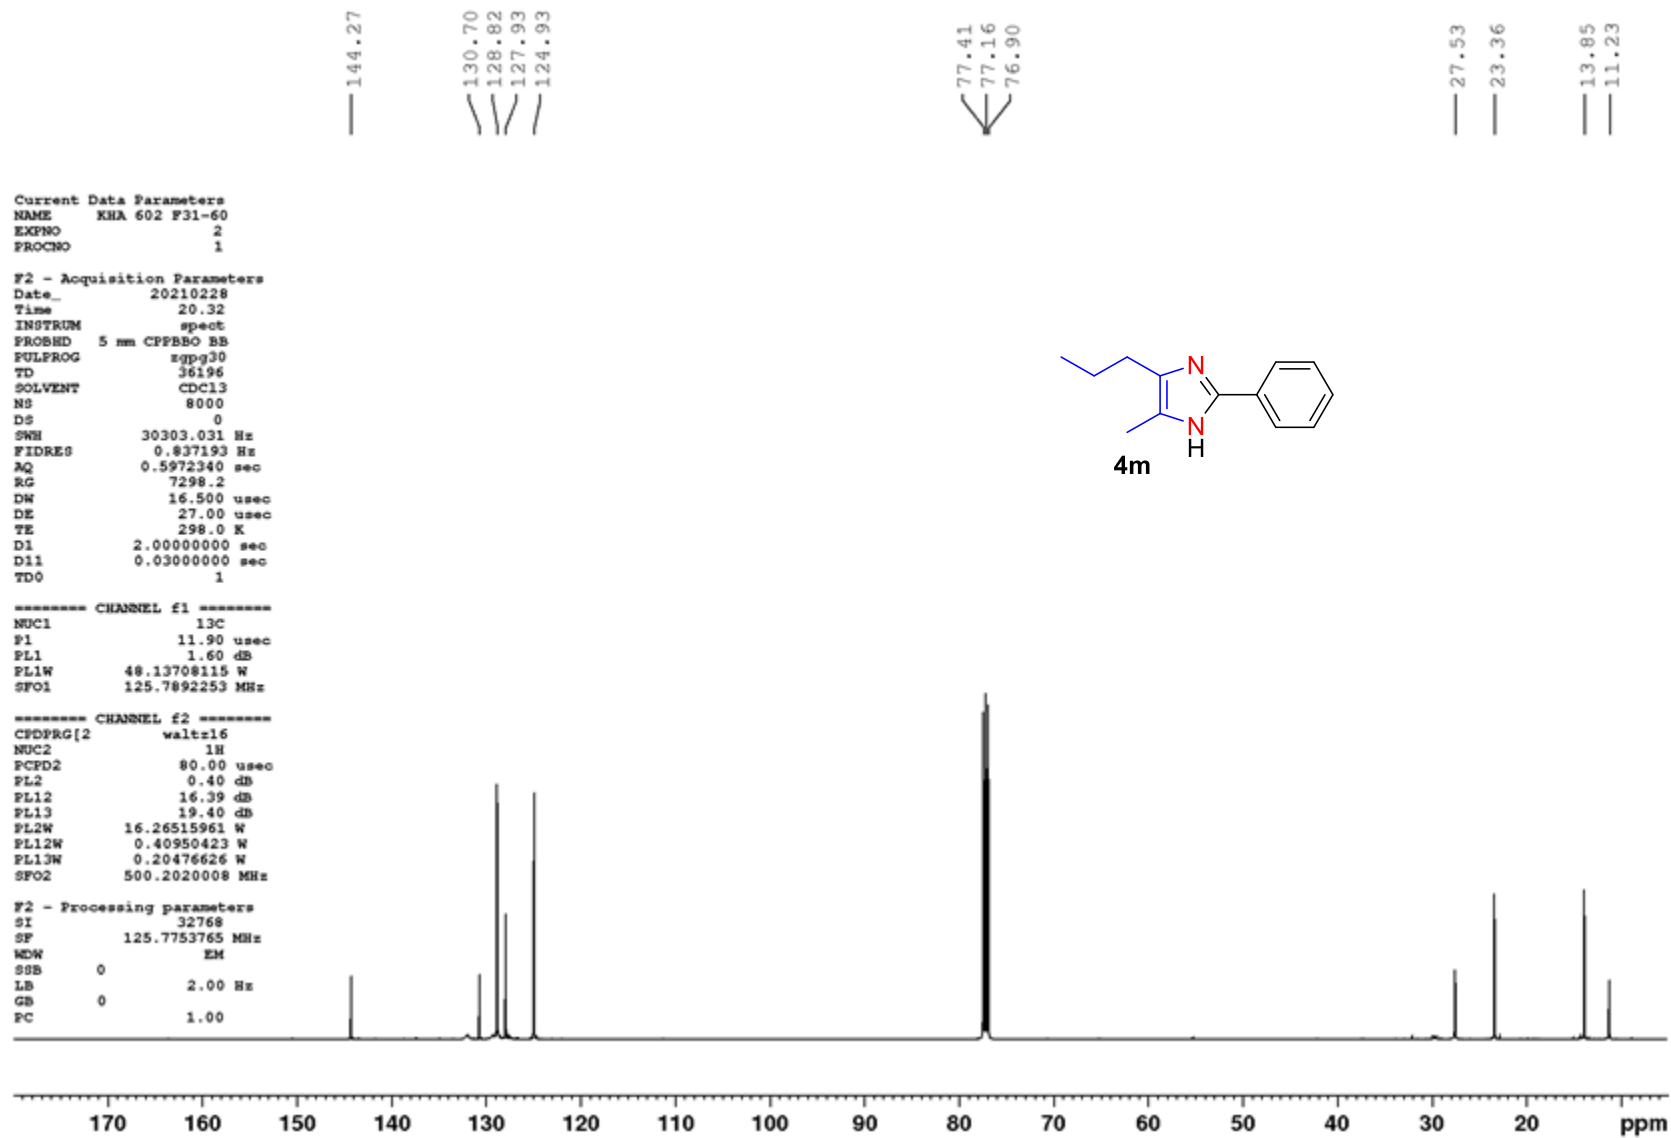

Figure S83.  $^{13}\text{C}$  NMR spectrum of compound **4m** (125 MHz,  $\text{CDCl}_3$ , 25  $^\circ\text{C}$ )



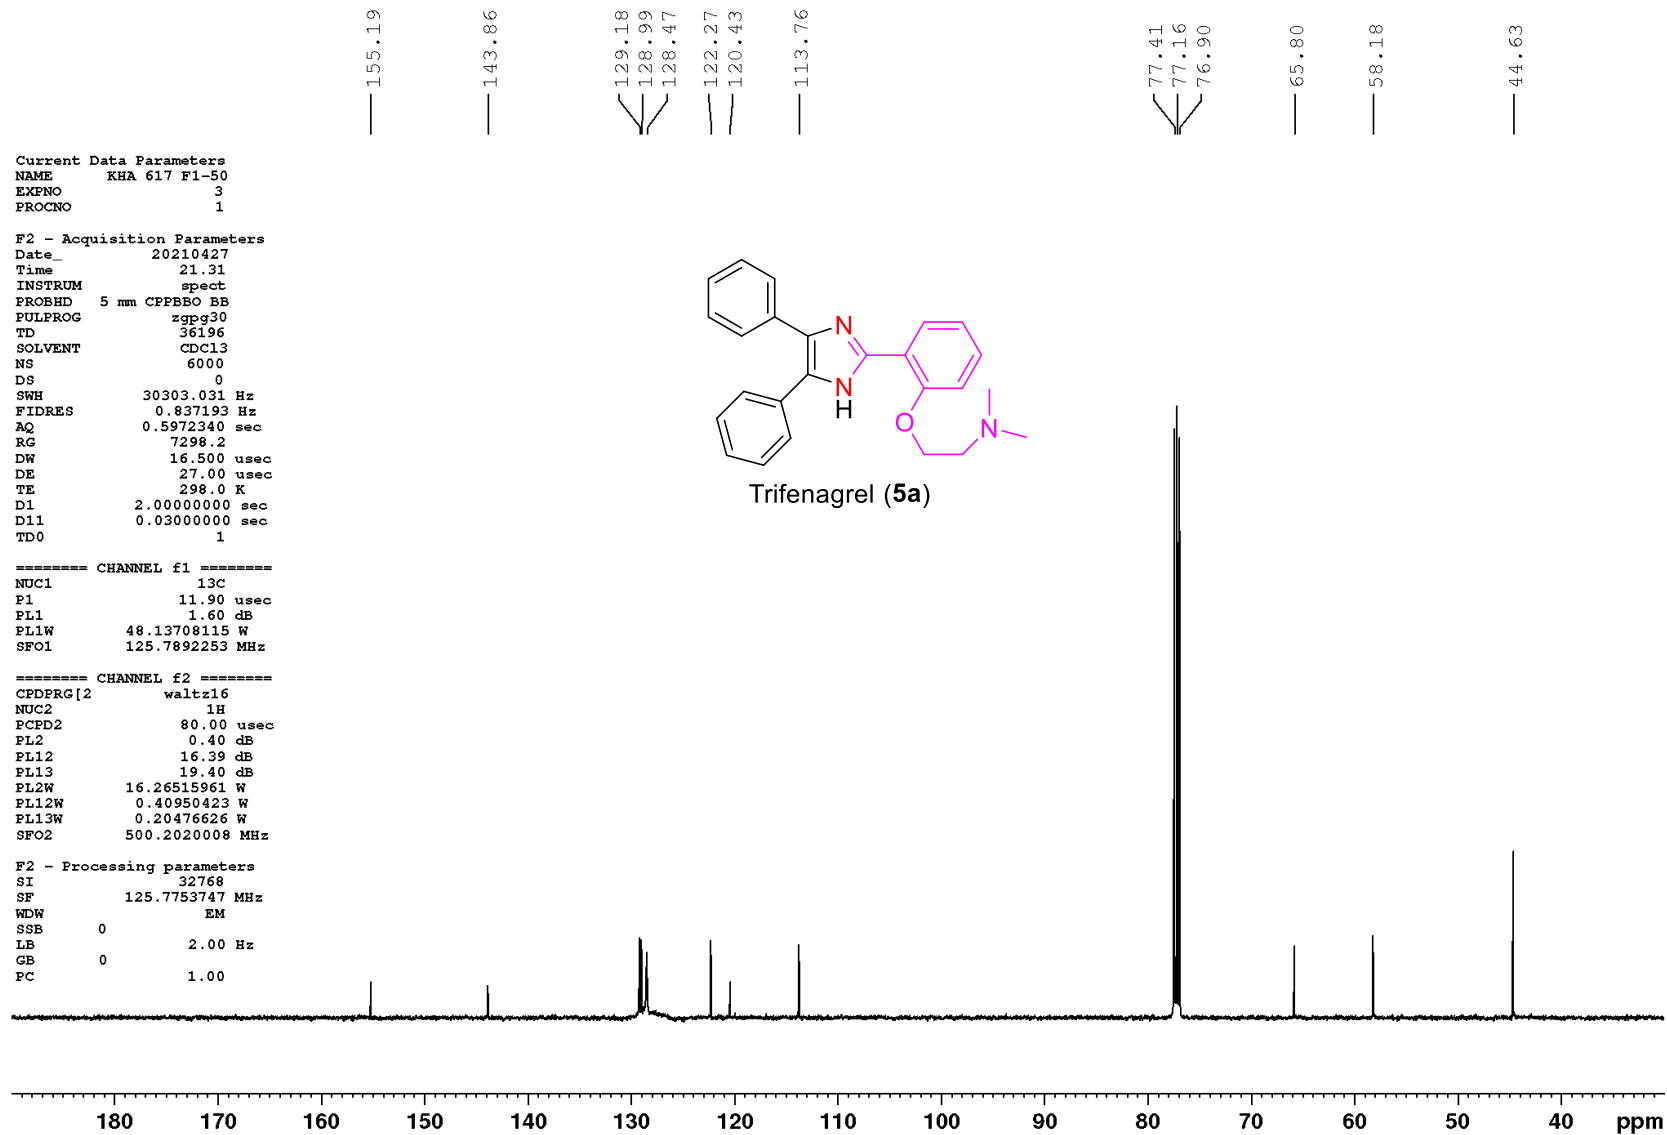

Figure S85. <sup>13</sup>C NMR spectrum of compound **5a** (125 MHz, CDCl<sub>3</sub>, 25 °C)

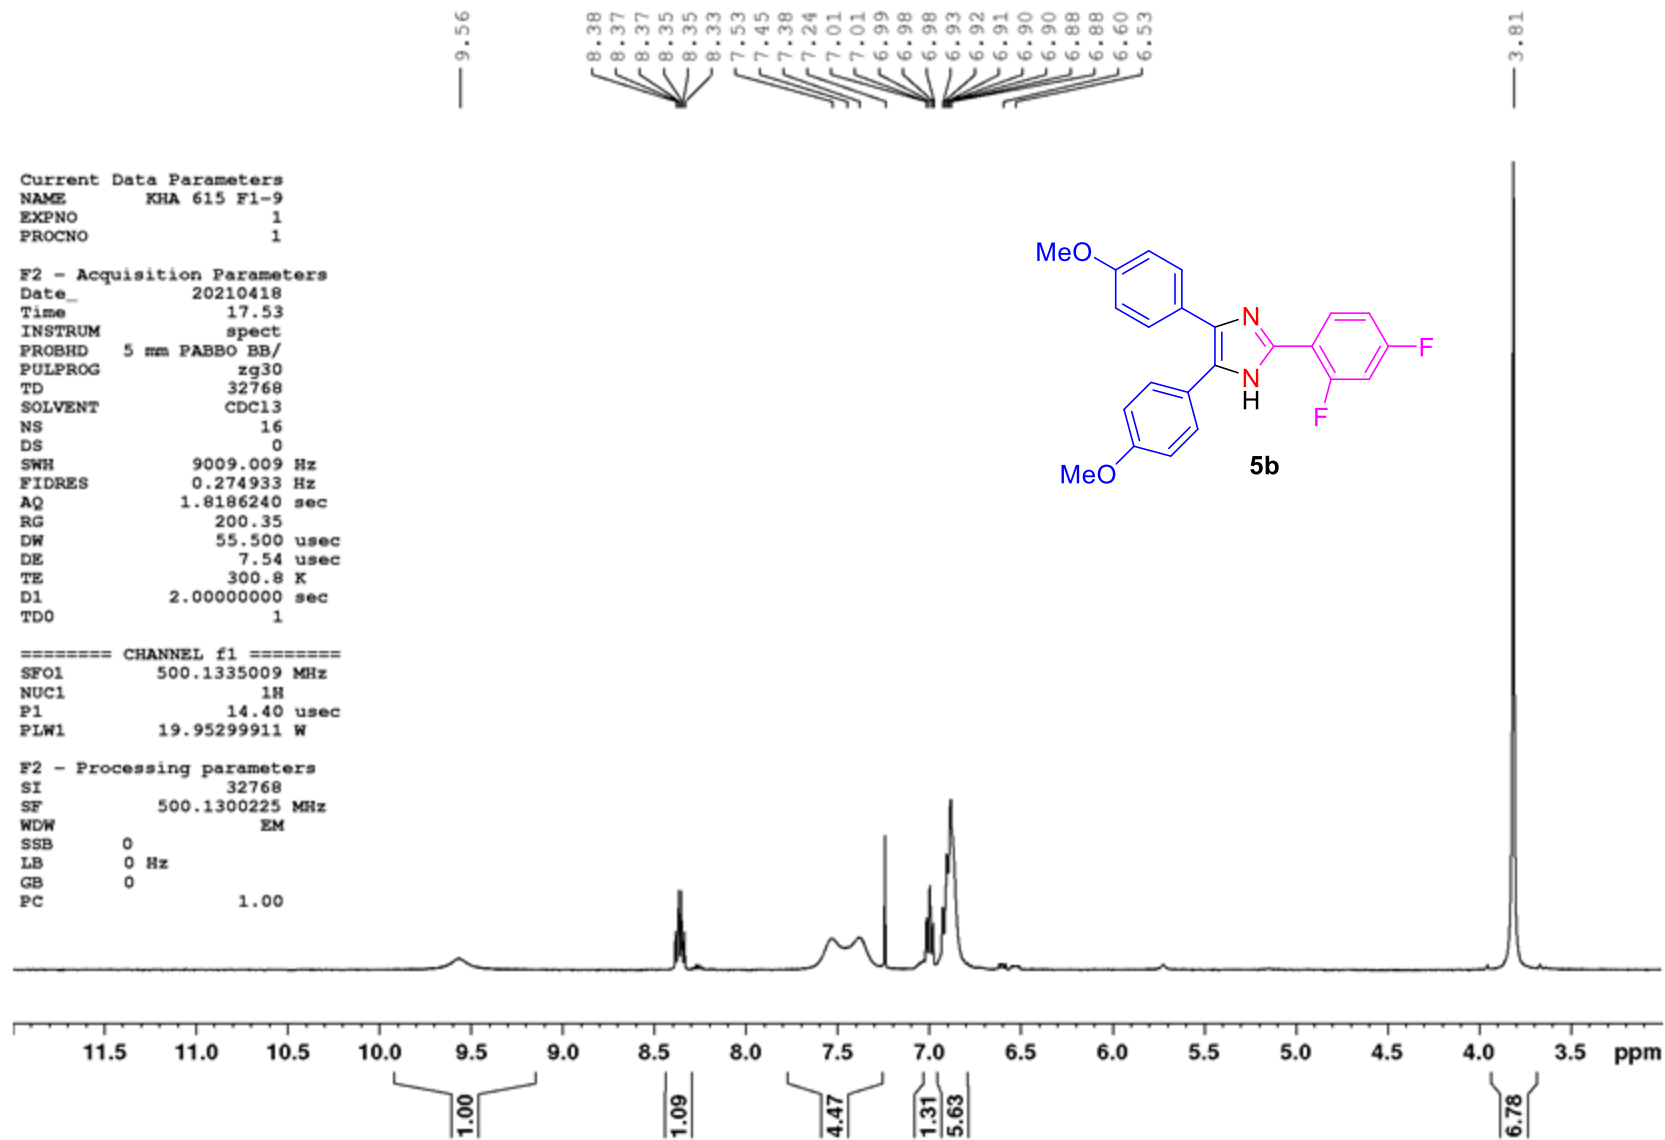

Figure S86. <sup>1</sup>H NMR spectrum of compound **5b** (500 MHz, CDCl<sub>3</sub>, 25 °C)



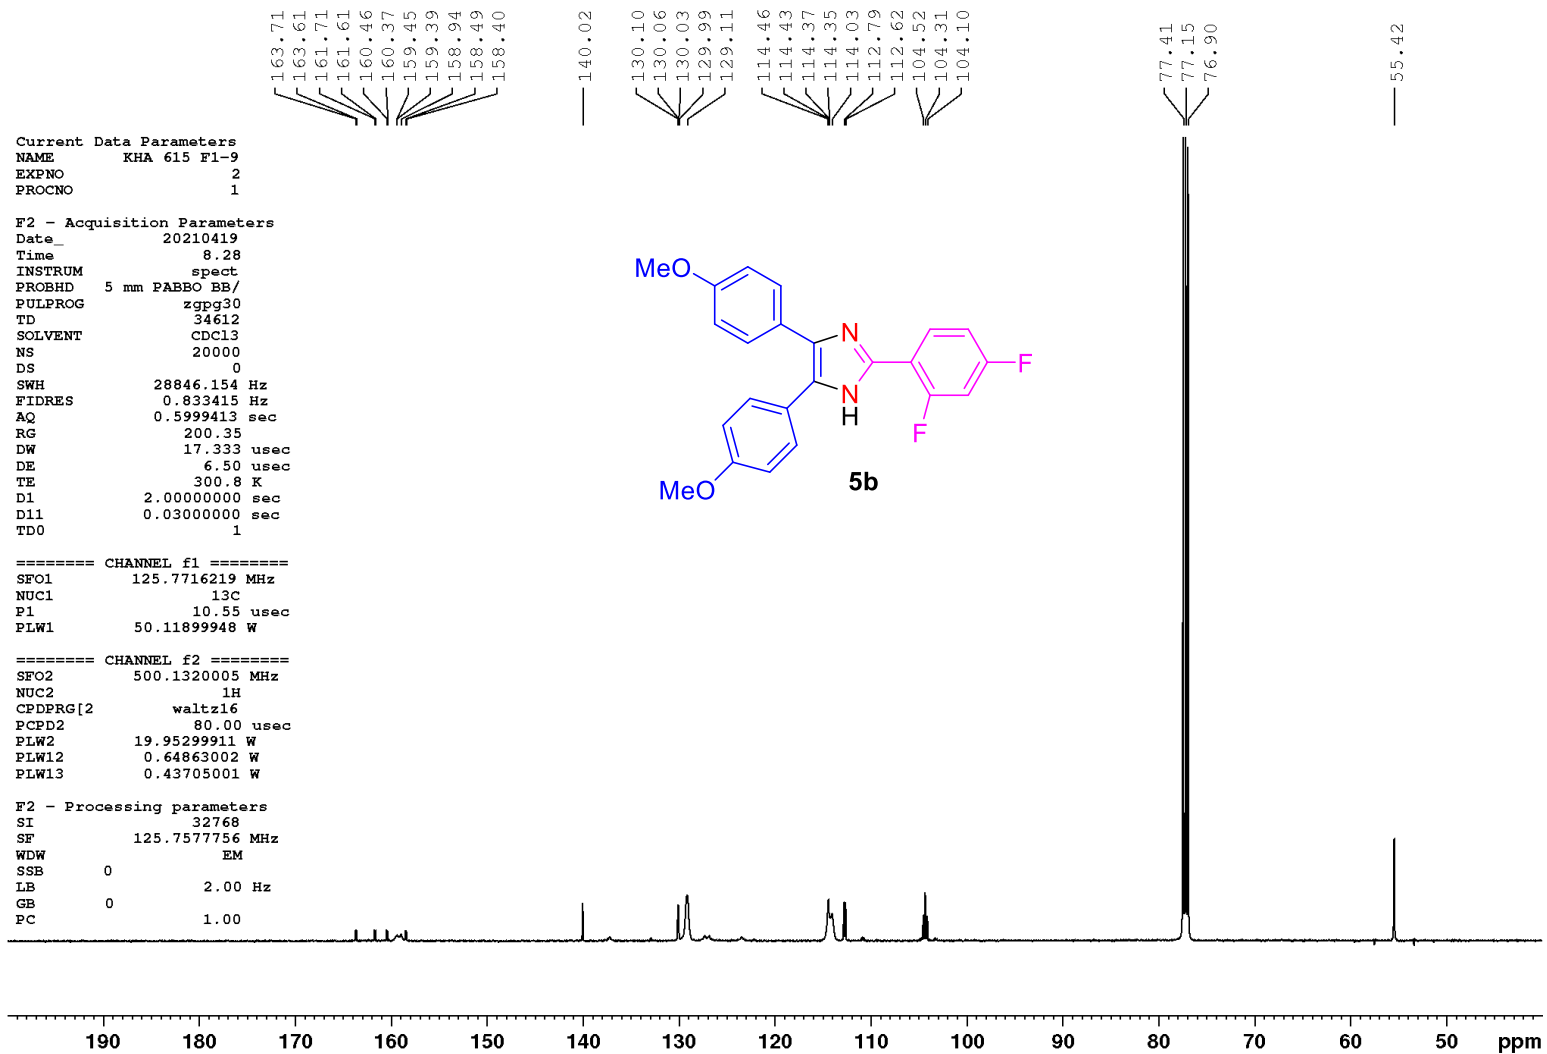

Figure S87. <sup>13</sup>C NMR spectrum of compound **5b** (125 MHz, CDCl<sub>3</sub>, 25 °C)

Spectrum

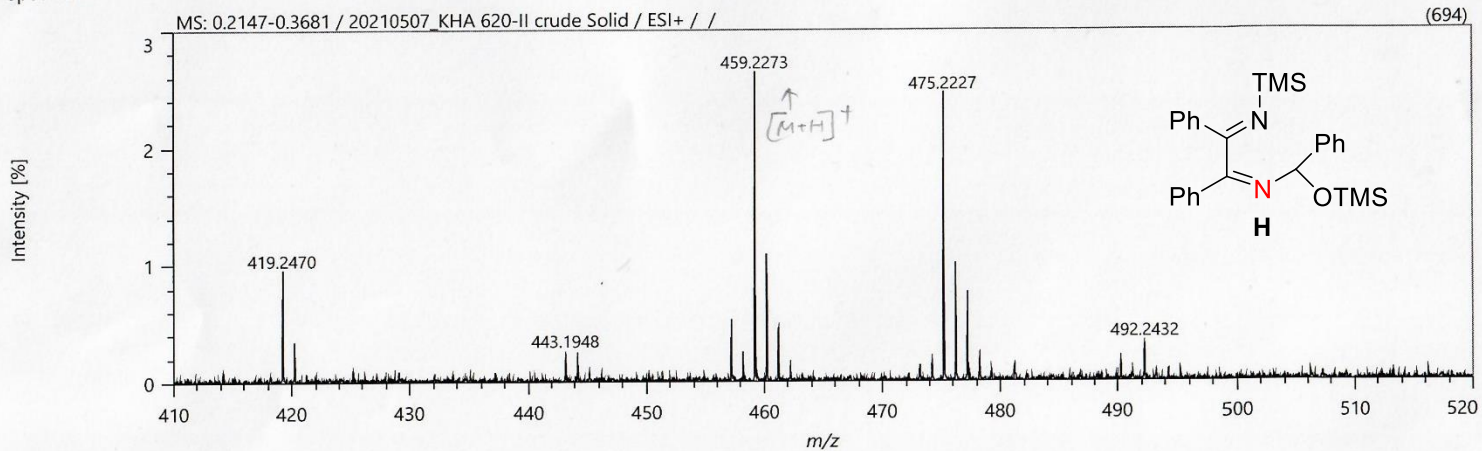

Elemental Composition

Parameters

Tolerance:  $\pm 3.00$  ppm  
 Electron: Odd/Even  
 Charge: +1  
 DBE: -99.0 - 999.0

Elements Set 1:

| Symbol | C   | H    | Si | O | N |
|--------|-----|------|----|---|---|
| Min    | 0   | 0    | 2  | 1 | 2 |
| Max    | 400 | 1000 | 2  | 1 | 2 |

Results

| Mass      | Formula                                                          | Calculated Mass | Mass Difference [mDa] | Mass Difference [ppm] | DBE  |
|-----------|------------------------------------------------------------------|-----------------|-----------------------|-----------------------|------|
| 459.22726 | C <sub>27</sub> H <sub>35</sub> N <sub>2</sub> O Si <sub>2</sub> | 459.22824       | -0.98                 | -2.14                 | 13.5 |

Figure S88. HRMS of ethane-1,2-diimine intermediate **H**
